# Supplementary material for: Proteogenomic Characterization of Pseudomonas veronii SM-20 Growing on Phenanthrene as Only Carbon and Energy Source
Source: MDPI journal article supplement (doi:10.3390/microorganisms12040753), 2024-04-08

# Chapter S1

## Supplementary materials

### Proteogenomic characterization of *Pseudomonas veronii* SM-20 growing on phenanthrene as only carbon and energy source

**Sofía G. Zavala-Meneses<sup>\*1,2</sup>, Andrea Firrincieli<sup>3</sup>, Petra Chalova<sup>4,5</sup>, Petr Pajer<sup>6</sup>, Alice Checcucci<sup>7</sup>, Ludovit Skultety<sup>\*1,4</sup>, Martina Cappelletti<sup>3</sup>**

<sup>1</sup> Institute of Microbiology, Czech Academy of Sciences, Videnska 1083, 14220, Prague, Czech Republic

<sup>2</sup> Charles University, Faculty of Science, Vinicna 5, 12844, Prague, Czech Republic

<sup>3</sup> Department of Pharmacy and Biotechnology, University of Bologna, 40126 Bologna, Italy; andrea.firrincieli3@unibo.it or andrea.firrincieli@unitus.it (A.F.); martina.cappelletti2@unibo.it (M.C.)

<sup>4</sup> Biomedical Research Center, Slovak Academy of Sciences, Dubravska c. 9, 845 05 Bratislava, Slovakia; petra.chalova@savba.sk

<sup>5</sup> Faculty of Pharmacy, Comenius University, Odbojarov 10, 832 32 Bratislava, Slovakia

<sup>6</sup> Military Health Institute, Military Medical Agency, U Vojenske nemocnice 1200, 169 02 Prague, Czech Republic; petr.pajer@img.cas.cz

<sup>7</sup> Department of Agriculture, Food, Environment and Forestry, University of Florence, 50100 Firenze, Italy; alice.checcucci@unifi.it

\* Correspondence: szavala.meneses@biomed.cas.cz (S.G.Z.-M.); viruludo@savba.sk (L.S.)

**Supplementary Table S1. GenIII microplate composition**

| well_id | chemical                    | category of metabolic source |
|---------|-----------------------------|------------------------------|
| A01     | Negative control            | C-Source, negative control   |
| A02     | Dextrin                     | C-Source, carbohydrate       |
| A03     | D-Maltose                   | C-Source, carbohydrate       |
| A04     | D-Trehalose                 | C-Source, carboxylic acid    |
| A05     | D-Cellobiose                | C-Source, carboxylic acid    |
| A06     | Gentobiose                  | C-Source, carbohydrate       |
| A07     | Sucrose                     | C-Source, amino acid         |
| A08     | D-turanose                  | C-Source, amino acid         |
| A09     | Stachyose                   | C-Source, amino acid         |
| A10     | Positive control            | Resistance                   |
| A11     | pH 6                        | Resistance                   |
| A12     | pH 5                        | Resistance                   |
| B01     | D-Raffinose                 | C-Source, amino acid         |
| B02     | $\alpha$ -D-Lactose         | C-Source, carbohydrate       |
| B03     | D-Melibiose                 | C-Source, carbohydrate       |
| B04     | $\beta$ -Methyl-D-Glucoside | C-Source, carbohydrate       |
| B05     | D-salicin                   | C-Source, carboxylic acid    |
| B06     | N-Acetyl-D-Glucosamine      | C-Source, carboxylic acid    |
| B07     | N-Acetyl-B-D-Mannosamine    | C-Source, carbohydrate       |
| B08     | N-Acetyl-D-Galactosamine    | C-Source, carbohydrate       |
| B09     | N-Acetyl Neuroaminic acid   | C-Source, carboxylic acid    |
| B10     | 1% NaCl                     | Resistance                   |
| B11     | 4% NaCl                     | Resistance                   |
| B12     | 8% NaCl                     | Resistance                   |
| C01     | A-D-Glucose                 | C-Source, carbohydrate       |
| C02     | D-Mannose                   | C-Source, carboxylic acid    |
| C03     | D-Fructose                  | C-Source, carboxylic acid    |
| C04     | D-Galactose                 | C-Source, carbohydrate       |
| C05     | 3-Methyl Glucose            | C-Source, fatty acid         |

|     |                     |                           |
|-----|---------------------|---------------------------|
| C06 | D-Fucose            | C-Source, carbohydrate    |
| C07 | L-Fucose            | C-Source, carbohydrate    |
| C08 | L-Rhamnose          | C-Source, carboxylic acid |
| C09 | Inosine             | C-Source, carbohydrate    |
| C10 | 1% Sodium Lactate   | Resistance                |
| C11 | D-Sorbitol          | Resistance                |
| C12 | D-Serine            | Resistance                |
| D01 | D-Sorbitol          | C-Source, amino acid      |
| D02 | D-Mannitol          | C-Source, amino acid      |
| D03 | D-Arabitol          | C-Source, carboxylic acid |
| D04 | myo-Inositol        | C-Source, alcohol         |
| D05 | Glycerol            | C-Source, fatty acid      |
| D06 | D-Glucose-6-PO4     | C-Source, carboxylic acid |
| D07 | D-Fructose-6-PO4    | C-Source, carboxylic acid |
| D08 | D-Asparic Acid      | C-Source, carbohydrate    |
| D09 | D-Serine            | C-Source, carbohydrate    |
| D10 | Troleandomycin      | Resistance                |
| D11 | Rifamycin SV        | Resistance                |
| D12 | Minocycline         | Resistance                |
| E01 | Gelatin             | C-Source, amino acid      |
| E02 | Glycil-L-Proline    | C-Source, carboxylic acid |
| E03 | L-Alanine           | C-Source, carbohydrate    |
| E04 | L-Arginine          | C-Source, carbohydrate    |
| E05 | L-Aspartic acid     | C-Source, fatty acid      |
| E06 | L-Glutamic acid     | C-Source, carboxylic acid |
| E07 | L-Histidine         | C-Source, carboxylic acid |
| E08 | L-Pyroglutamic acid | C-Source, carbohydrate    |
| E09 | L-Serine            | C-Source, carbohydrate    |
| E10 | Lincomycin          | Resistance                |
| E11 | Guanidine HCl       | Resistance                |
| E12 | Niaproof 4          | Resistance                |

|     |                                   |                           |
|-----|-----------------------------------|---------------------------|
| F01 | Pectin                            | C-Source, amino acid      |
| F02 | D-Galacturonic acid               | C-Source, carboxylic acid |
| F03 | L-galactonic acid lactone         | C-Source, carbohydrate    |
| F04 | D-gluconic acid                   | C-Source, amino acid      |
| F05 | D- glucuronic acid                | C-Source, carboxylic acid |
| F06 | Glucuronamide                     | C-Source, carboxylic acid |
| F07 | Mucic acid                        | C-Source, carboxylic acid |
| F08 | Quinic acid                       | C-Source, carboxylic acid |
| F09 | D-Saccharic acid                  | C-Source, carboxylic acid |
| F10 | Vancomycin                        | Resistance                |
| F11 | Tetrazolium violet                | Resistance                |
| F12 | Tetrazolium blue                  | Resistance                |
| G01 | p-Hydroxy-phenylacetic acid       | C-Source, amino acid      |
| G02 | Methyl pyruvate                   | C-Source, carboxylic acid |
| G03 | D-Lactic acid methyl ester        | C-Source, amino acid      |
| G04 | L-Lactic acid                     | C-Source, amino acid      |
| G05 | Citric acid                       | C-Source, amino acid      |
| G06 | $\alpha$ --Keto-glutaric acid     | C-Source, amino acid      |
| G07 | D-Malic acid                      | C-Source, carboxylic acid |
| G08 | L-Malic acid                      | C-Source, carbohydrate    |
| G09 | Bromo-succinic acid               | C-Source, carboxylic acid |
| G10 | Nalidixic acid                    | Resistance                |
| G11 | Lithium chloride                  | Resistance                |
| G12 | Potassium tellurite               | Resistance                |
| H01 | Tween 40                          | C-Source, amino acid      |
| H02 | G-amino-butyric acid              | C-Source, carboxylic acid |
| H03 | $\alpha$ -hydroxy-butyric acid    | C-Source, carboxylic acid |
| H04 | $\beta$ -hydroxy-D-L-Butyric acid | C-Source, amine           |
| H05 | $\alpha$ -keto-butyric acid       | C-Source, carbohydrate    |
| H06 | Acetoacetic acid                  | C-Source, carbohydrate    |
| H07 | Propionic acid                    | C-Source, amide           |

|     |                 |                           |
|-----|-----------------|---------------------------|
| H08 | Acetic acid     | C-Source, carboxylic acid |
| H09 | Formic acid     | C-Source, carboxylic acid |
| H10 | Aztreonam       | Resistance                |
| H11 | Sodium Butyrate | Resistance                |
| H12 | Sodium Bromate  | Resistance                |

**Supplementary Table S2.** Metabolic clusters and functions involved in aromatic hydrocarbon degradation in *Pseudomonas veronii* SM-20 from RAST annotation

| Feature ID            | Function                                                                                                               | Subsystem                                                                                          |
|-----------------------|------------------------------------------------------------------------------------------------------------------------|----------------------------------------------------------------------------------------------------|
| fig 76761.49.peg.970  | Possible 4-oxalocrotonate tautomerase                                                                                  |                                                                                                    |
| fig 76761.49.peg.971  | Putative short-chain dehydrogenase                                                                                     |                                                                                                    |
| fig 76761.49.peg.972  | 4-hydroxy-2-oxovalerate aldolase (EC 4.1.3.39)                                                                         | Cinnamic Acid Degradation                                                                          |
| fig 76761.49.peg.973  | Acetaldehyde dehydrogenase, acetylating, (EC 1.2.1.10) in gene cluster for degradation of phenols, cresols, catechol   |                                                                                                    |
| fig 76761.49.peg.974  | Oxaloacetate tautomerase ( EC:5.3.2.2 )                                                                                |                                                                                                    |
| fig 76761.49.peg.975  | 4-oxalocrotonate decarboxylase (EC 4.1.1.77)                                                                           |                                                                                                    |
| fig 76761.49.peg.976  | 2-hydroxyhexa-2,4-dienoate hydratase (EC 4.2.1.132)                                                                    |                                                                                                    |
| fig 76761.49.peg.977  | Putative 5-carboxymethyl-2-hydroxymuconate semialdehyde dehydrogenase oxidoreductase protein (EC 1.2.1.60)             | Aromatic Amino Acid Degradation                                                                    |
| fig 76761.49.peg.978  | Phenol hydroxylase, FAD- and [2Fe-2S]-containing reductase component dmpp                                              | Phenol Hydroxylase                                                                                 |
| fig 76761.49.peg.979  | Phenol hydroxylase, P4 oxygenase component dmpo (EC 1.14.13.7)                                                         | Phenol Hydroxylase                                                                                 |
| fig 76761.49.peg.983  | Phenol hydroxylase, assembly protein dmpk                                                                              | Phenol Hydroxylase                                                                                 |
| fig 76761.49.peg.984  | Catechol 2,3-dioxygenase (EC 1.13.11.2)                                                                                |                                                                                                    |
| fig 76761.49.peg.985  | Hypothetical protein                                                                                                   |                                                                                                    |
| fig 76761.49.peg.986  | Positive regulator of phenol hydroxylase                                                                               |                                                                                                    |
| fig 76761.49.peg.987  | Hypothetical protein                                                                                                   |                                                                                                    |
| fig 76761.49.peg.988  | Exporter protein, RND family                                                                                           |                                                                                                    |
| fig 76761.49.peg.989  | BNR repeat protein                                                                                                     |                                                                                                    |
| fig 76761.49.peg.990  | Hypothetical protein                                                                                                   |                                                                                                    |
| fig 76761.49.peg.991  | Hypothetical protein                                                                                                   |                                                                                                    |
| fig 76761.49.peg.992  | Aromatic hydrocarbon utilization transcriptional regulator CatR (LysR family)                                          | DNA-binding regulatory proteins, strays                                                            |
| fig 76761.49.peg.993  | Hypothetical protein                                                                                                   |                                                                                                    |
| fig 76761.49.peg.1044 | Methyl-accepting chemotaxis sensor/transducer protein                                                                  |                                                                                                    |
| fig 76761.49.peg.1045 | 2-polyprenylphenol hydroxylase and related flavodoxin oxidoreductases / CDP-6-deoxy-delta-3,4-glucoseen reductase-like |                                                                                                    |
| fig 76761.49.peg.1046 | 4-hydroxy-2-oxovalerate aldolase (EC 4.1.3.39)                                                                         | Cinammic Acid Degradation                                                                          |
| fig 76761.49.peg.1047 | Acetaldehyde dehydrogenase, acetylating, (EC 1.2.1.10) in gene cluster for degradation of phenols, cresols, catechol   |                                                                                                    |
| fig 76761.49.peg.1048 | Long-chain-fatty-acid--coa ligase (EC 6.2.1.3)                                                                         | n-phenyl Alkanoic Acid Degradation                                                                 |
| fig 76761.49.peg.1049 | Aromatic--coa ligase                                                                                                   |                                                                                                    |
| fig 76761.49.peg.1050 | 2-keto-4-pentenoate hydratase (EC 4.2.1.80)                                                                            | Cinammic Acid Degradation                                                                          |
| fig 76761.49.peg.1051 | Putative oxidoreductase, nitronate monooxygenase family                                                                |                                                                                                    |
| fig 76761.49.peg.1052 | 2,3-dihydroxy-2,3-dihydro-phenylpropionate dehydrogenase (EC 1.3.1.87)                                                 |                                                                                                    |
| fig 76761.49.peg.1053 | 3-phenylpropionate dioxygenase, beta subunit (EC 1.14.12.19)                                                           | Dioxygenases (EC 1.14.12.-), Aromatic dioxygenase mess, Phenylpropionate, cinamic acid degradation |

|                       |                                                                                                                                                                              |                                                                                                    |
|-----------------------|------------------------------------------------------------------------------------------------------------------------------------------------------------------------------|----------------------------------------------------------------------------------------------------|
| fig 76761.49.peg.1054 | 3-phenylpropionate dioxygenase, alpha subunit (EC 1.14.12.19)                                                                                                                | Dioxygenases (EC 1.14.12.-), Aromatic dioxygenase mess, Phenylpropionate, cinamic acid degradation |
| fig 76761.49.peg.1055 | 3-phenylpropionate dioxygenase ferredoxin subunit                                                                                                                            | Dioxygenases (EC 1.14.12.-), Aromatic dioxygenase mess, Phenylpropionate, cinamic acid degradation |
| fig 76761.49.peg.1056 | 3-carboxyethylcatechol 2,3-dioxygenase (EC 1.13.11.16)                                                                                                                       | Dioxygenases (EC 1.14.12.-), Aromatic dioxygenase mess, cinamic acid degradation                   |
| fig 76761.49.peg.1057 | Hypothetical protein                                                                                                                                                         |                                                                                                    |
| fig 76761.49.peg.1058 | 2-hydroxymuconic semialdehyde hydrolase (EC 3.7.1.9)                                                                                                                         |                                                                                                    |
| fig 76761.49.peg.1059 | Transcriptional regulator, acrr family                                                                                                                                       |                                                                                                    |
| fig 76761.49.peg.1060 | Hypothetical protein                                                                                                                                                         |                                                                                                    |
| fig 76761.49.peg.1061 | ABC transporter, permease protein 1 (cluster 4, leucine/isoleucine/valine/benzoate)                                                                                          |                                                                                                    |
| fig 76761.49.peg.1062 | ABC transporter, permease protein 2 (cluster 4, leucine/isoleucine/valine/benzoate) / ABC transporter, ATP-binding protein 1 (cluster 4, leucine/isoleucine/valine/benzoate) |                                                                                                    |
| fig 76761.49.peg.1063 | Branched-chain amino acid transport ATP-binding protein livf (TC 3.A.1.4.1)                                                                                                  |                                                                                                    |
| fig 76761.49.peg.1064 | ABC transporter, substrate-binding protein (cluster 4, leucine/isoleucine/valine/benzoate)                                                                                   |                                                                                                    |
| fig 76761.49.peg.1410 | Xenobiotic reductase A                                                                                                                                                       |                                                                                                    |
| fig 76761.49.peg.1411 | Transcriptional regulator, arsr family                                                                                                                                       |                                                                                                    |
| fig 76761.49.peg.1439 | 3-(3-hydroxyphenyl) propanoate hydroxylase (EC 1.14.13.127)                                                                                                                  |                                                                                                    |
| fig 76761.49.peg.1440 | 3-carboxyethylcatechol 2,3-dioxygenase (EC 1.13.11.16)                                                                                                                       | Dioxygenases (EC 1.14.12.-), Aromatic dioxygenase mess, cinamic acid degradation                   |
| fig 76761.49.peg.1441 | 2-hydroxy-6-oxonona-2,4-dienedioate hydrolase (EC 3.7.1.14)                                                                                                                  |                                                                                                    |
| fig 76761.49.peg.1442 | 2-keto-4-pentenoate hydratase (EC 4.2.1.80)                                                                                                                                  | Cinnamic Acid Degradation                                                                          |
| fig 76761.49.peg.1443 | Acetaldehyde dehydrogenase, acetylating, (EC 1.2.1.10) in gene cluster for degradation of phenols, cresols, catechol                                                         |                                                                                                    |
| fig 76761.49.peg.1444 | Acetaldehyde dehydrogenase, acetylating, (EC 1.2.1.10) in gene cluster for degradation of phenols, cresols, catechol                                                         |                                                                                                    |
| fig 76761.49.peg.1445 | 4-hydroxy-2-oxovalerate aldolase (EC 4.1.3.39)                                                                                                                               | Cinnamic Acid Degradation                                                                          |
| fig 76761.49.peg.1446 | 3-(3-hydroxyphenyl)propionate transporter, MFS-type                                                                                                                          |                                                                                                    |
| fig 76761.49.peg.1447 | Outer membrane low permeability porin, oprd family                                                                                                                           |                                                                                                    |
| fig 76761.49.peg.1460 | Protein involved in meta-pathway of phenol degradation                                                                                                                       |                                                                                                    |
| fig 76761.49.peg.1462 | Putative benzaldehyde dehydrogenase oxidoreductase protein (EC 1.2.1.28)                                                                                                     |                                                                                                    |
| fig 76761.49.peg.1673 | Protein involved in meta-pathway of phenol degradation                                                                                                                       |                                                                                                    |
| fig 76761.49.peg.1674 | Transcriptional regulator, arac family                                                                                                                                       |                                                                                                    |

|                       |                                                                                                                                                                              |                                                                                                 |
|-----------------------|------------------------------------------------------------------------------------------------------------------------------------------------------------------------------|-------------------------------------------------------------------------------------------------|
| fig 76761.49.peg.1720 | FMNH2-dependent alkanesulfonate monooxygenase (EC 1.14.14.5)                                                                                                                 |                                                                                                 |
| fig 76761.49.peg.1722 | Transcriptional regulator clustered with alkanesulfonate monooxygenase                                                                                                       |                                                                                                 |
| fig 76761.49.peg.1725 | Glyoxalase/bleomycin resistance protein/dioxygenase                                                                                                                          |                                                                                                 |
| fig 76761.49.peg.1813 | Oxidoreductase, short-chain dehydrogenase/reductase family                                                                                                                   |                                                                                                 |
| fig 76761.49.peg.1814 | Aromatic-ring-hydroxylating dioxygenase, beta subunit                                                                                                                        | Dioxygenases (1.14.12.-), Aromatic dioxygenase mess                                             |
| fig 76761.49.peg.1815 | Ring hydroxylating dioxygenase, alpha subunit/Rieske (2Fe-2S) protein (EC 1.14.12.18)                                                                                        | Dioxygenases (1.14.12.-), Aromatic dioxygenase mess                                             |
| fig 76761.49.peg.1821 | ABC transporter, substrate-binding protein (cluster 4, leucine/isoleucine/valine/benzoate)                                                                                   |                                                                                                 |
| fig 76761.49.peg.1822 | ABC transporter, permease protein 1 (cluster 4, leucine/isoleucine/valine/benzoate)                                                                                          |                                                                                                 |
| fig 76761.49.peg.1823 | ABC transporter, permease protein 2 (cluster 4, leucine/isoleucine/valine/benzoate) / ABC transporter, ATP-binding protein 1 (cluster 4, leucine/isoleucine/valine/benzoate) |                                                                                                 |
| fig 76761.49.peg.1824 | ABC transporter, ATP-binding protein 2 (cluster 4, leucine/isoleucine/valine/benzoate)                                                                                       |                                                                                                 |
| fig 76761.49.peg.1830 | Protein involved in meta-pathway of phenol degradation                                                                                                                       |                                                                                                 |
| fig 76761.49.peg.1831 | Phenylacetaldehyde dehydrogenase (EC 1.2.1.39)                                                                                                                               | Aromatic Aminoacid Catabolism                                                                   |
| fig 76761.49.peg.1832 | Transcriptional regulator, arac family                                                                                                                                       |                                                                                                 |
| fig 76761.49.peg.1833 | Putative ABC transporter, substrate binding protein                                                                                                                          |                                                                                                 |
| fig 76761.49.peg.1834 | Hypothetical protein                                                                                                                                                         |                                                                                                 |
| fig 76761.49.peg.1835 | Transcriptional regulator, marr family                                                                                                                                       |                                                                                                 |
| fig 76761.49.peg.1836 | Phage-related integrase                                                                                                                                                      |                                                                                                 |
| fig 76761.49.peg.1837 | Protocatechuate 3,4-dioxygenase alpha chain (EC 1.13.11.3)                                                                                                                   |                                                                                                 |
| fig 76761.49.peg.1838 | Protocatechuate 3,4-dioxygenase beta chain (EC 1.13.11.3)                                                                                                                    | Protocatechuate branch of beta-ketoadipate pathway                                              |
| fig 76761.49.peg.1839 | Pca operon transcriptional activator pcaq                                                                                                                                    | Protocatechuate branch of beta-ketoadipate pathway                                              |
| fig 76761.49.peg.2406 | 4-carboxymuconolactone decarboxylase (EC 4.1.1.44)                                                                                                                           |                                                                                                 |
| fig 76761.49.peg.2407 | Beta-ketoadipate enol-lactone hydrolase (EC 3.1.1.24)                                                                                                                        | Protocatechuate branch of beta-ketoadipate pathway                                              |
| fig 76761.49.peg.2408 | 3-carboxy-cis,cis-muconate cycloisomerase (EC 5.5.1.2)                                                                                                                       | Protocatechuate branch of beta-ketoadipate pathway                                              |
| fig 76761.49.peg.2409 | Dicarboxylic acid transporter pcat                                                                                                                                           | Protocatechuate branch of beta-ketoadipate pathway                                              |
| fig 76761.49.peg.2410 | Protocatechuate 3,4-dioxygenase alpha chain (EC 1.13.11.3)                                                                                                                   | Protocatechuate branch of beta-ketoadipate pathway                                              |
| fig 76761.49.peg.2411 | Protocatechuate 3,4-dioxygenase beta chain (EC 1.13.11.3)                                                                                                                    | Protocatechuate branch of beta-ketoadipate pathway                                              |
| fig 76761.49.peg.2412 | 3-oxoadipyl-coa thiolase (EC 2.3.1.174)                                                                                                                                      | Protocatechuate branch of beta-ketoadipate pathway                                              |
| fig 76761.49.peg.2413 | 3-oxoadipate coa-transferase subunit B (EC 2.8.3.6)                                                                                                                          |                                                                                                 |
| fig 76761.49.peg.2414 | 3-oxoadipate coa-transferase subunit A (EC 2.8.3.6)                                                                                                                          | Catechol branch of beta-ketoadipate pathway, Protocatechuate branch of beta-ketoadipate pathway |



|                       |                                                                                                                                         |                                                                                                 |
|-----------------------|-----------------------------------------------------------------------------------------------------------------------------------------|-------------------------------------------------------------------------------------------------|
| fig 76761.49.peg.2415 | Hypothetical protein                                                                                                                    | Catechol branch of beta-ketoadipate pathway, Protocatechuate branch of beta-ketoadipate pathway |
| fig 76761.49.peg.2416 | 4-hydroxybenzoate transporter                                                                                                           |                                                                                                 |
| fig 76761.49.peg.2417 | Pca regulon regulatory protein pcar                                                                                                     | Cinnamic Acid Degradation, Gentisate degradation, p-Hydroxybenzoate degradation                 |
| fig 76761.49.peg.2418 | Hypothetical protein                                                                                                                    | Cinnamic Acid Degradation, Gentisate degradation, p-Hydroxybenzoate degradation                 |
| fig 76761.49.peg.2742 | Fumarylacetoacetase (EC 3.7.1.2)                                                                                                        | Homogentisate pathway of aromatic compound degradation                                          |
| fig 76761.49.peg.2743 | Homogentisate 1,2-dioxygenase (EC 1.13.11.5)                                                                                            | Homogentisate pathway of aromatic compound degradation                                          |
| fig 76761.49.peg.2744 | Homogentisate pathway transcriptional regulator hmgr                                                                                    |                                                                                                 |
| fig 76761.49.peg.3077 | 4-oxalocrotonate tautomerase (EC 5.3.2.-)                                                                                               |                                                                                                 |
| fig 76761.49.peg.3078 | 4-oxalocrotonate decarboxylase (EC 4.1.1.77)                                                                                            |                                                                                                 |
| fig 76761.49.peg.3079 | 4-hydroxy-2-oxovalerate aldolase (EC 4.1.3.39)                                                                                          | Cinnamic Acid Degradation                                                                       |
| fig 76761.49.peg.3080 | Acetaldehyde dehydrogenase, acetylating, (EC 1.2.1.10) in gene cluster for degradation of phenols, cresols, catechol                    |                                                                                                 |
| fig 76761.49.peg.3081 | 2-hydroxyhexa-2,4-dienoate hydratase (EC 4.2.1.132)                                                                                     |                                                                                                 |
| fig 76761.49.peg.3082 | 2-hydroxymuconic semialdehyde hydrolase (EC 3.7.1.9)                                                                                    |                                                                                                 |
| fig 76761.49.peg.3083 | Putative 5-carboxymethyl-2-hydroxymuconate semialdehyde dehydrogenase oxidoreductase protein (EC 1.2.1.60)                              | Aromatic Amino Acid Degradation                                                                 |
| fig 76761.49.peg.3084 | Catechol 2,3-dioxygenase (EC 1.13.11.2)                                                                                                 |                                                                                                 |
| fig 76761.49.peg.3085 | Positive regulator of phenol hydroxylase, dmpr                                                                                          | Phenol Hydroxylase                                                                              |
| fig 76761.49.peg.3086 | Hypothetical protein                                                                                                                    |                                                                                                 |
| fig 76761.49.peg.3087 | Hypothetical protein                                                                                                                    |                                                                                                 |
| fig 76761.49.peg.3088 | Catechol 2,3-dioxygenase (EC 1.13.11.2)                                                                                                 |                                                                                                 |
| fig 76761.49.peg.3089 | Benzoate 1,2-dioxygenase alpha subunit (EC 1.14.12.10)                                                                                  | Dioxygenases (EC 1.14.12.-), Benzoate degradation, Aromatic dioxygenase mess                    |
| fig 76761.49.peg.3090 | Benzoate 1,2-dioxygenase beta subunit (EC 1.14.12.10)                                                                                   | Dioxygenases (EC 1.14.12.-), Benzoate degradation, Aromatic dioxygenase mess                    |
| fig 76761.49.peg.3091 | Hypothetical protein                                                                                                                    |                                                                                                 |
| fig 76761.49.peg.3092 | Putative benzaldehyde dehydrogenase oxidoreductase protein (EC 1.2.1.28)                                                                |                                                                                                 |
| fig 76761.49.peg.3294 | Anthranilate phosphoribosyltransferase (EC 2.4.2.18)                                                                                    | 3-hydroxyanthranilate, PAPA antibiotics                                                         |
| fig 76761.49.peg.3295 | Anthranilate synthase, amidotransferase component (EC 4.1.3.27) @ Para-aminobenzoate synthase, amidotransferase component (EC 2.6.1.85) | 3-hydroxyanthranilate, PAPA antibiotics                                                         |
| fig 76761.49.peg.3296 | Anthranilate synthase, aminase component (EC 4.1.3.27)                                                                                  | 3-hydroxyanthranilate, PAPA antibiotics                                                         |
| fig 76761.49.peg.3627 | 2-polyprenylphenol hydroxylase and related flavodoxin oxidoreductases / CDP-6-deoxy-delta-3,4-glucoseen reductase-like                  |                                                                                                 |
| fig 76761.49.peg.3628 | 3-polyprenyl-4-hydroxybenzoate carboxy-lyase                                                                                            |                                                                                                 |

(EC 4.1.1.98)

|                       |                                                                                                                      |                                                                                         |
|-----------------------|----------------------------------------------------------------------------------------------------------------------|-----------------------------------------------------------------------------------------|
| fig 76761.49.peg.3938 | Quinone oxidoreductase (EC 1.6.5.5)                                                                                  |                                                                                         |
| fig 76761.49.peg.3939 | Coproporphyrinogen III oxidase, aerobic (EC 1.3.3.3)                                                                 |                                                                                         |
| fig 76761.49.peg.3940 | Shikimate 5-dehydrogenase I alpha (EC 1.1.1.25)                                                                      |                                                                                         |
| fig 76761.49.peg.3941 | Sulfate permease                                                                                                     |                                                                                         |
| fig 76761.49.peg.4762 | 4-hydroxyphenylpyruvate dioxygenase (EC 1.13.11.27)                                                                  | Homogentisate pathway of aromatic compound degradation, Aromatic Amino Acid degradation |
| fig 76761.49.peg.4763 | Transcriptional regulator, acrr family                                                                               |                                                                                         |
| fig 76761.49.peg.4764 | Quinate/shikimate 5-dehydrogenase I delta (EC 1.1.1.25)                                                              | Common pathway for Synthesis of Aromatic Compounds                                      |
| fig 76761.49.peg.4765 | 3-dehydroquinate dehydratase II (EC 4.2.1.10)                                                                        | Common pathway for Synthesis of Aromatic Compounds, Quinate degradation                 |
| fig 76761.49.peg.4820 | 2-keto-4-pentenoate hydratase (EC 4.2.1.80)                                                                          | Cinnamic Acid Degradation                                                               |
| fig 76761.49.peg.4821 | Acetaldehyde dehydrogenase, acetylating, (EC 1.2.1.10) in gene cluster for degradation of phenols, cresols, catechol |                                                                                         |
| fig 76761.49.peg.4822 | 4-hydroxy-2-oxovalerate aldolase (EC 4.1.3.39)                                                                       | Cinnamic Acid Degradation                                                               |
| fig 76761.49.peg.4823 | Hypothetical protein                                                                                                 |                                                                                         |
| fig 76761.49.peg.4830 | Transcriptional regulator, arac family                                                                               |                                                                                         |
| fig 76761.49.peg.4831 | Rieske (2Fe-2S) domain protein                                                                                       |                                                                                         |
| fig 76761.49.peg.4834 | Putative arac-family transcriptional regulator                                                                       |                                                                                         |
| fig 76761.49.peg.4835 | Putative oxygenase subunit                                                                                           |                                                                                         |
| fig 76761.49.peg.4836 | Hypothetical protein                                                                                                 |                                                                                         |
| fig 76761.49.peg.4837 | Hypothetical protein                                                                                                 |                                                                                         |
| fig 76761.49.peg.4838 | 2-polyprenylphenol hydroxylase and related flavodoxin oxidoreductases                                                |                                                                                         |
| fig 76761.49.peg.4839 | Uncharacterized deacetylase                                                                                          |                                                                                         |
| fig 76761.49.peg.4840 | Hydantoin racemase (EC 5.1.99.5)                                                                                     |                                                                                         |
| fig 76761.49.peg.4842 | Oxidoreductase, short-chain dehydrogenase/reductase family                                                           |                                                                                         |
| fig 76761.49.peg.4843 | 2,3-dihydroxybiphenyl 1,2-dioxygenase                                                                                |                                                                                         |
| fig 76761.49.peg.4844 | 2-hydroxymuconic semialdehyde hydrolase (EC 3.7.1.9)                                                                 |                                                                                         |
| fig 76761.49.peg.4961 | Tryptophan 2,3-dioxygenase (EC 1.13.11.11)                                                                           | Aromatic Amino Acid Degradation                                                         |
| fig 76761.49.peg.4962 | Aromatic amino acid transport protein arop                                                                           | Aromatic Amino Acid Degradation                                                         |
| fig 76761.49.peg.4963 | Benzoate dioxygenase, ferredoxin reductase component; Anthranilate dioxygenase reductase                             | Dioxygenases (EC 1.14.12.-), Aromatic dioxygenase mess, Aromatic Amino Acid Degradation |
| fig 76761.49.peg.4964 | Benzoate 1,2-dioxygenase beta subunit (EC 1.14.12.10)                                                                | Dioxygenases (EC 1.14.12.-), Benzoate degradation, Aromatic dioxygenase mess            |
| fig 76761.49.peg.4965 | Benzoate 1,2-dioxygenase alpha subunit (EC 1.14.12.10)                                                               | Dioxygenases (EC 1.14.12.-), Benzoate degradation, Aromatic dioxygenase mess            |

|                       |                                                                                                                                          |                                                                                                                           |
|-----------------------|------------------------------------------------------------------------------------------------------------------------------------------|---------------------------------------------------------------------------------------------------------------------------|
| fig 76761.49.peg.4966 | Hypothetical protein                                                                                                                     |                                                                                                                           |
| fig 76761.49.peg.4967 | Benabc operon transcriptional activator benr                                                                                             | Benzoate degradation                                                                                                      |
| fig 76761.49.peg.4968 | Aromatic hydrocarbon utilization transcriptional regulator catr (lysr family)                                                            | DNA-binding regulatory proteins                                                                                           |
| fig 76761.49.peg.4969 | Muconate cycloisomerase (EC 5.5.1.1)                                                                                                     | Catechol branch of beta-ketoadipate pathway, Muconate lactonizing enzyme family                                           |
| fig 76761.49.peg.4970 | Muconolactone isomerase (EC 5.3.3.4)                                                                                                     | Catechol branch of beta-ketoadipate pathway                                                                               |
| fig 76761.49.peg.4971 | Catechol 1,2-dioxygenase (EC 1.13.11.1)                                                                                                  | Catechol branch of beta-ketoadipate pathway                                                                               |
| fig 76761.49.peg.4972 | Transcriptional regulator, asnc family                                                                                                   |                                                                                                                           |
| fig 76761.49.peg.4973 | Kynureninase (EC 3.7.1.3)                                                                                                                | NAD and NADP cofactor biosynthesis global                                                                                 |
| fig 76761.49.peg.4974 | Transcriptional regulator, lysr family                                                                                                   |                                                                                                                           |
| fig 76761.49.peg.4975 | Putative membrane protein                                                                                                                |                                                                                                                           |
| fig 76761.49.peg.6134 | Putative diheme cytochrome c-553                                                                                                         | Soluble cytochromes and functionally related electron carriers                                                            |
| fig 76761.49.peg.6135 | Transcriptional regulator, lysr family                                                                                                   |                                                                                                                           |
| fig 76761.49.peg.6136 | 2-hydroxychromene-2-carboxylate isomerase/dsba-like thioredoxin domain                                                                   |                                                                                                                           |
| fig 76761.49.peg.6137 | NADH:flavin oxidoreductases, Old Yellow Enzyme family                                                                                    |                                                                                                                           |
| fig 76761.49.peg.6138 | 2-polyprenyl-6-methoxyphenol hydroxylase and related FAD-dependent oxidoreductases                                                       |                                                                                                                           |
| fig 76761.49.peg.6139 | Hypothetical protein                                                                                                                     |                                                                                                                           |
| fig 76761.49.peg.6140 | 2-amino-3-carboxymuconate-6-semialdehyde decarboxylase (EC 4.1.1.45)                                                                     |                                                                                                                           |
| fig 76761.49.peg.6141 | Transcriptional regulator, lysr family                                                                                                   |                                                                                                                           |
| fig 76761.49.peg.412  | Alkane-1 monooxygenase (EC 1.14.15.3)                                                                                                    |                                                                                                                           |
| fig 76761.49.peg.842  | Cyclohexanone monooxygenase (EC 1.14.13.22)                                                                                              |                                                                                                                           |
| fig 76761.49.peg.1070 | L-lysine 6-monooxygenase [NADPH] (EC 1.14.13.59), aerobactin biosynthesis protein iucd @ Siderophore biosynthesis protein, monooxygenase |                                                                                                                           |
| fig 76761.49.peg.1305 | Putative monooxygenase PA5393                                                                                                            |                                                                                                                           |
| fig 76761.49.peg.1370 | Nitrilotriacetate monooxygenase component A (EC 1.14.13.-)                                                                               |                                                                                                                           |
| fig 76761.49.peg.1551 | Tryptophan 2-monooxygenase (EC 1.13.12.3)                                                                                                | Aromatic Amino Acid degradation                                                                                           |
| fig 76761.49.peg.1773 | Ammonia monooxygenase                                                                                                                    |                                                                                                                           |
| fig 76761.49.peg.2356 | Flavin-dependent monooxygenase arso associated with arsenic resistance                                                                   |                                                                                                                           |
| fig 76761.49.peg.3284 | Putative oxidoreductase, nitronate monooxygenase family                                                                                  |                                                                                                                           |
| fig 76761.49.peg.621  | Alpha-ketoglutarate-dependent dioxygenase alkb (EC 1.14.11.33)                                                                           |                                                                                                                           |
| fig 76761.49.peg.644  | 4-hydroxyphenylpyruvate dioxygenase (EC 1.13.11.27)                                                                                      | Aromatic amino acid degradation, homogentisate pathway of aromatic compound degradation, pterin carbinolamine dehydratase |
| fig 76761.49.peg.1104 | Fe(2+)/alpha-ketoglutarate-dependent dioxygenase lpxo                                                                                    |                                                                                                                           |

|                       |                                                                                                                                                     |                                                                           |  |
|-----------------------|-----------------------------------------------------------------------------------------------------------------------------------------------------|---------------------------------------------------------------------------|--|
| fig 76761.49.peg.1482 | Glyoxalase/bleomycin resistance protein/dioxygenase                                                                                                 |                                                                           |  |
| fig 76761.49.peg.5025 | Flavo-hemoglobin / Nitric oxide dioxygenase (EC 1.14.12.17)                                                                                         |                                                                           |  |
| fig 76761.49.peg.5955 | 1,2-dihydroxy-3-keto-5-methylthiopentene dioxygenase (EC 1.13.11.54)                                                                                |                                                                           |  |
| fig 76761.49.peg.338  | 4-carboxymuconolactone decarboxylase domain/alkylhydroperoxidase ahpD family core domain protein                                                    |                                                                           |  |
| fig 76761.49.peg.428  | 3-carboxymuconate cyclase                                                                                                                           |                                                                           |  |
| fig 76761.49.peg.514  | 3-demethylubiquinone-9 3-methyltransferase                                                                                                          |                                                                           |  |
| fig 76761.49.peg.688  | Putative cytochrome P450 hydroxylase                                                                                                                |                                                                           |  |
| fig 76761.49.peg.818  | 2,3-dihydroxybenzoate-AMP ligase (EC 2.7.7.58) [pyochelin] siderophore @ 2,3-dihydroxybenzoate-AMP ligase (EC 2.7.7.58) of siderophore biosynthesis | Siderophore pyochelin                                                     |  |
| fig 76761.49.peg.1278 | Transcriptional regulator, iclr family                                                                                                              | Homogentisate pathway of aromatic compound degradation                    |  |
| fig 76761.49.peg.1362 | Cysteine dioxygenase (EC 1.13.11.20)                                                                                                                | Aromatic dioxygenase mess, Dioxygenases (EC. 1.13.11.-)                   |  |
| fig 76761.49.peg.1541 | 2-keto-3-deoxy-D-arabino-heptulosonate-7-phosphate synthase I alpha (EC 2.5.1.54)                                                                   | Chorismate synthesis                                                      |  |
| fig 76761.49.peg.1594 | Shikimate 5-dehydrogenase I gamma (EC 1.1.1.25)                                                                                                     | Chorismate synthesis                                                      |  |
| fig 76761.49.peg.2002 | 2-keto-3-deoxy-D-arabino-heptulosonate-7-phosphate synthase II (EC 2.5.1.54)                                                                        | Chorismate synthesis                                                      |  |
| fig 76761.49.peg.2097 | 3-demethylubiquinol 3-O-methyltransferase (EC 2.1.1.64) @ 2-polyprenyl-6-hydroxyphenyl methylase (EC 2.1.1.222)                                     |                                                                           |  |
| fig 76761.49.peg.2248 | P-hydroxybenzoate hydroxylase (EC 1.14.13.2)                                                                                                        | P-hydroxybenzoate degradation                                             |  |
| fig 76761.49.peg.2258 | Transcriptional regulator, lysr family                                                                                                              |                                                                           |  |
| fig 76761.49.peg.2259 | Probable 5-carboxymethyl-2-hydroxymuconate delta isomerase                                                                                          | Aromatic amino acid degradation                                           |  |
| fig 76761.49.peg.2904 | 4-carboxymuconolactone decarboxylase (EC 4.1.1.44)                                                                                                  | Protochatechuate branch of beta-ketoadipate pathway                       |  |
| fig 76761.49.peg.3405 | Predicted hydrocarbon binding protein (contains V4R domain)                                                                                         |                                                                           |  |
| fig 76761.49.peg.3562 | Fumarylacetoacetate hydrolase family protein                                                                                                        | Gentisate degradation                                                     |  |
| fig 76761.49.peg.3611 | 2-polyprenylphenol hydroxylase                                                                                                                      |                                                                           |  |
| fig 76761.49.peg.3612 | 2-polyprenyl-6-methoxyphenol hydroxylase                                                                                                            |                                                                           |  |
| fig 76761.49.peg.3684 | Benzoate transport protein                                                                                                                          | Benzoate degradation                                                      |  |
| fig 76761.49.peg.3769 | 4-hydroxybenzoate polyprenyltransferase (EC 2.5.1.39)                                                                                               |                                                                           |  |
| fig 76761.49.peg.4167 | Uncharacterized protein, possibly involved in aromatic compounds catabolism                                                                         |                                                                           |  |
| fig 76761.49.peg.4183 | Putative 4-hydroxybenzoyl-coa thioesterase                                                                                                          | Gentisate degradation                                                     |  |
| fig 76761.49.peg.4339 | Shikimate kinase I (EC 2.7.1.71)                                                                                                                    | Chorismate synthesis, common pathway for synthesis of aromatic compounds) |  |
| fig 76761.49.peg.4340 | 3-dehydroquinate synthase (EC 4.2.3.4)                                                                                                              | Chorismate synthesis, common pathway for synthesis of aromatic compounds) |  |
| fig 76761.49.peg.4545 | 3-dehydroquinate dehydratase II (EC 4.2.1.10)                                                                                                       |                                                                           |  |
| fig 76761.49.peg.4847 | Inner membrane component of tripartite multidrug resistance system                                                                                  |                                                                           |  |
| fig 76761.49.peg.5641 | Para-aminobenzoate synthase, aminase component (EC 2.6.1.85)                                                                                        | Chorismate biosynthesis, 3-hydroxyanthranilate, tryptophan biosynthesis   |  |
| fig 76761.49.peg.6060 | Biosynthetic Aromatic amino acid aminotransferase alpha (EC 2.6.1.57) @ Aromatic-amino-acid aminotransferase (EC 2.6.1.57)                          | Homogentisate pathway of aromatic compound degradation, phenylalanine and |  |

fig|76761.49.peg.6367 ABC transporter, ATP-binding protein 2 (cluster 4,  
leucine/isoleucine/valine/benzoate)

---

tyrsine branches from chorismate, pterin  
carbinolamine dehydratase

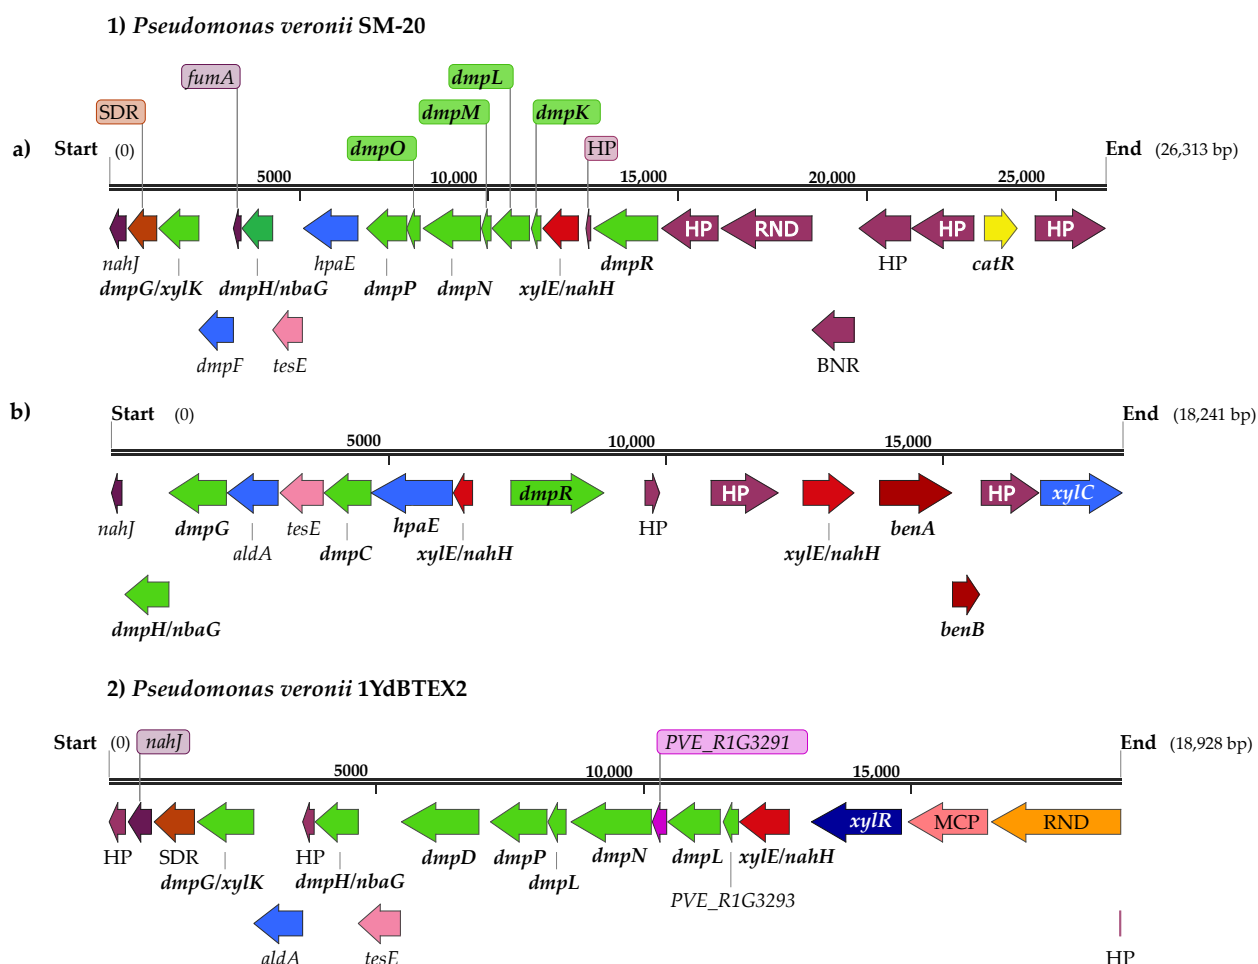

**Supplementary Figure S1.** Schematic representation of the gene clusters harboring the gene encoding the catechol 2,3-dioxygenase in *Pseudomonas veronii* SM-20 and *P. veronii* 1YdBTEX2. *nahJ*-4-oxalocrotonate tautomerase (EC 5.3.2.6); *SDR*-short chain dehydrogenase; *dmpG/xylK*- 4-hydroxy-2-oxovalerate aldolase (EC 4.1.3.39); *HP*- hypothetical protein; *dmpF/aldA*-acetaldehyde dehydrogenase (EC 1.2.1.10); *fumA*-oxaloacetate tautomerase (EC5.3.2.2); *dmpH/nbaG*- 4-oxalocrotonate decarboxylase (EC 4.1.1.77); *tesE*-2-hydroxyhexa-2,4-dienoate hydratase (EC 4.2.1.132); *dmpC*-2-hydroxymuconic semialdehyde hydrolase (EC 3.7.1.9); *dmpD*-2-hydroxymuconic semialdehyde dehydrogenase (EC 1.2.1.85); *hpaE*- 5-carboxymethyl-2-hydroxymuconate semialdehyde dehydrogenase oxidoreductase protein (EC1.2.1.60); *dmpP* - phenol hydroxylase P5 protein (EC 1.14.13.7); *dmpO*-phenol hydroxylase P4 oxygenase component (EC 1.14.13.7); *dmpN*-phenol hydroxylase P3 oxygenase component (EC 1.14.13.7); *dmpM* -phenol hydroxylase P2 oxygenase component (EC 1.14.13.7); *dmpL* - phenol hydroxylase P1 oxygenase component (EC 1.14.13.7); *dmpK*-phenol hydroxylase protein (EC 1.14.13.7); *xylE/ nahH* -catechol 2,3-dioxygenase (EC 1.13.11.2); *dmpR*-positive regulator of phenol hydroxylase; *RND*-Exporter protein RND family; *BNR*- BNR repeat protein; *catR*-Aromatic hydrocarbon utilization transcriptional regulator (LysR family); *benA*- benzoate 1,2-dioxygenase alpha subunit (EC 1.14.12.10); *benB*- benzoate 1,2-dioxygenase beta subunit; *xylC*- benzaldehyde dehydrogenase oxidoreductase protein (EC 1.2.1.28); *PVE\_R1G3291*- monooxygenase; *PVE\_R1G3293*-multi-component phenol hydroxylase; *xylR*-Transcriptional regulatory protein; *MCP*- methyl-accepting chemotaxis protein; *RND*-RND transporter.

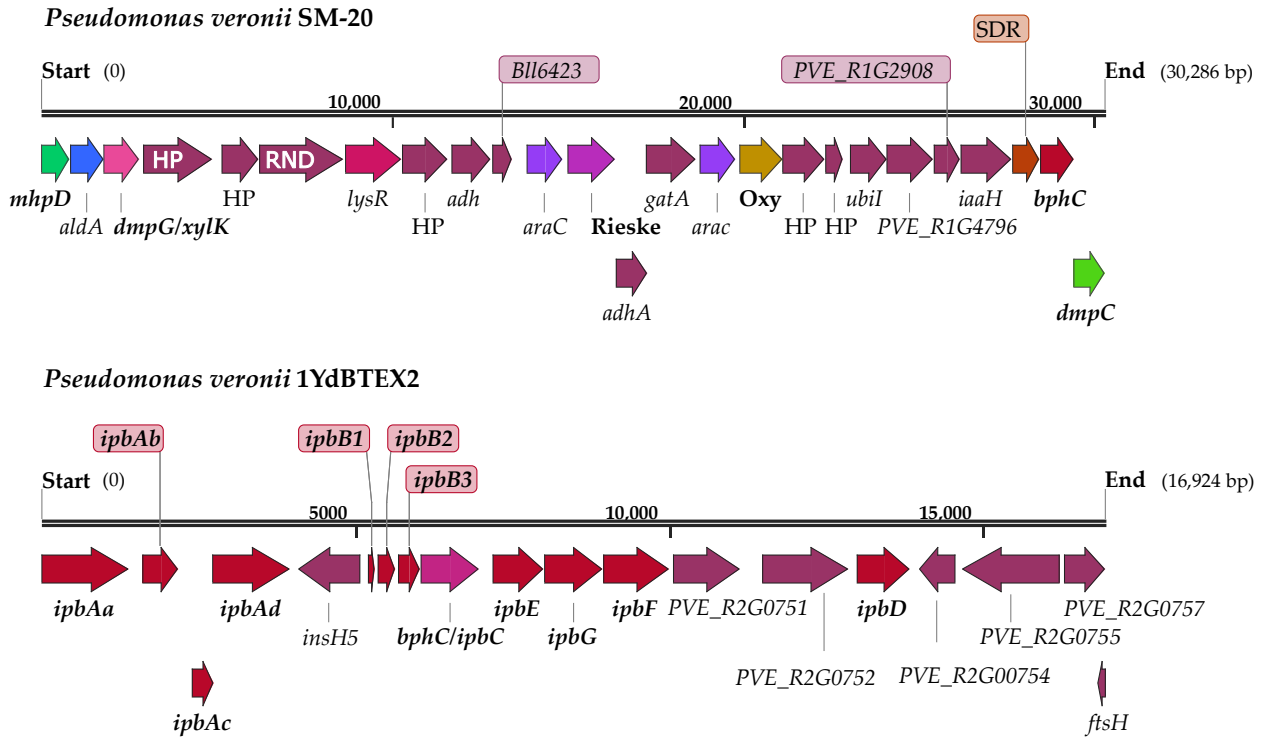

**Supplementary Figure S2.** Schematic representation of the gene clusters harboring the gene encoding the 2,3-hydroxybiphenyl 1,2-dioxygenase in *Pseudomonas veronii* SM-20 and *P. veronii* 1YdBTEX2. *mhpD*-2-keto-4-pentenoate hydratase (EC 4.2.1.80); *aldA*-acetaldehyde dehydrogenase (EC 1.2.1.10); *dmpG/xylK*-4-hydroxy-2-oxovalerate aldolase (EC 4.1.3.39); **HP**-hypothetical protein; **RND**-exporter protein, RND family; *lysR*-regulatory protein LysR; *adh*-Zn-containing alcohol dehydrogenase superfamily; *BII6423*-BII6423 protein; *araC*-transcriptional regulator, AraC family; *Rieske/PVE\_R1G5552*-Rieske (2Fe-2S) domain protein; *adhA*-hydrolase, alpha/beta fold family; *gatA*-glutamyl-tRNA (Gln) amidotransferase subunit A-like protein (EC 3.5.-); **Oxy**-oxygenase (EC 1.13.-/1.14.-); *ubil*-2-polyprenylphenol hydroxylase (EC 1.14.13.240); *PVE\_R1G4796*-uncharacterized deacetylase; *PVE\_G2908*-hydantoin racemase (EC 5.1.99.5); *iaaH*-indoleacetamide hydrolase (EC 3.5.1.-); **SDR**-short-chain dehydrogenase/reductase; *ipbC/bphC*-2,3-dihydroxybiphenyl 1,2-dioxygenase (EC1.13.11.39); *dmpC*-2-hydroxymuconic semialdehyde dehydrogenase (EC 3.7.1.9); *ipbAa*-isopropylbenzene dioxygenase, iron-sulfur protein, large subunit; *ipbAb*-isopropylbenzene dioxygenase, iron-sulfur protein, small subunit; *ipbAc*-isopropylbenzene dioxygenase, ferredoxin subunit; *ipbAd*-isopropylbenzene dioxygenase, ferredoxin reductase subunit; *PVE\_R2G0743/insH5*-transposase; *ipbB1*-cis-2,3-dihydroxy-2,3-dihydroisopropylbenzene dehydrogenase; *ipbB2*-cis-2,3-dihydroxy-2,3-dihydroisopropylbenzene dehydrogenase; *ipbB3*-cis-2,3-cis-2,3-dihydroxy-2,3-dihydroisopropylbenzene dehydrogenase-2,3-diol dehydrogenase; *ipbE*-2-hydroxypenta-2,4-dienoate hydratase (EC 4.2.1.132); *ipbG*-Acetaldehyde dehydrogenase (EC1.2.1.10); *ipbF*-4-hydroxy-2-oxovalerate aldolase (EC 4.1.3.39); *PVE\_R2G0751/PVE\_R2G0754*-endonuclease DDE; *PVE\_R2G0752*-outer membrane protein; *ipbD*-2-hydroxy-6-oxo-7-methylocta-2,4-dienoate hydrolase; *PVE\_R2G0755*-transposase for insertion sequence element IS1353; *PVE\_R2G0757*-integrase; *PVE\_R2G0756/ftsH*-ATP-dependent Zn protease.



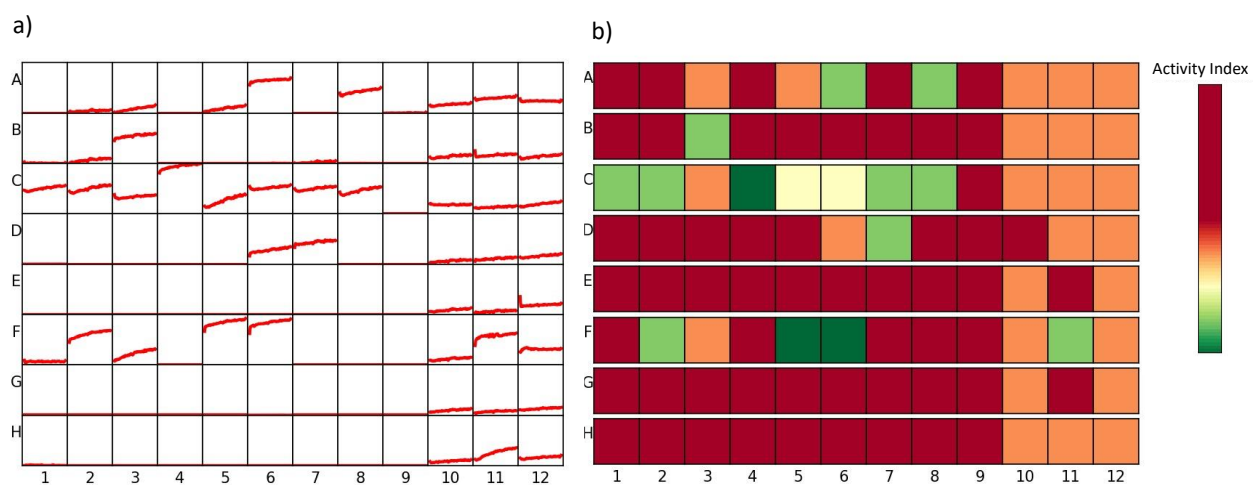

**Figure S3.** Metabolic profile of the strain: (a) Growth curves for every well and (b) heatmap of the activity indexes assigned for each substrate.

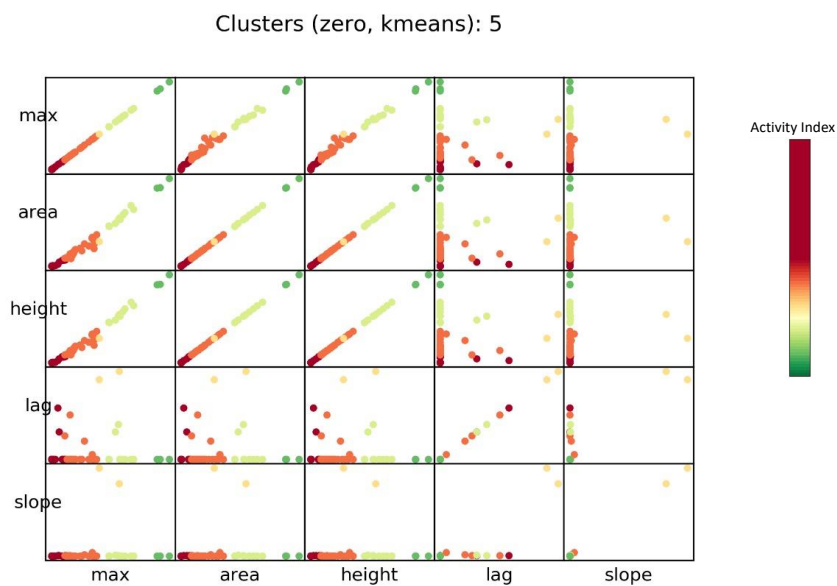

**Figure S4.** Scatter plot relationships between curve parameters and curve clusterization in *P. veronii* phenomic analysis. Each dot represents distinct curves and the colors referred to the assigned activity index. The clusters are ordered by the area parameter.



**Supplementary Figure S5.** Intermediates of the phenanthrene depletion by *P. veronii* isolate SM-20: **Phenanthrene 9,10-oxide**

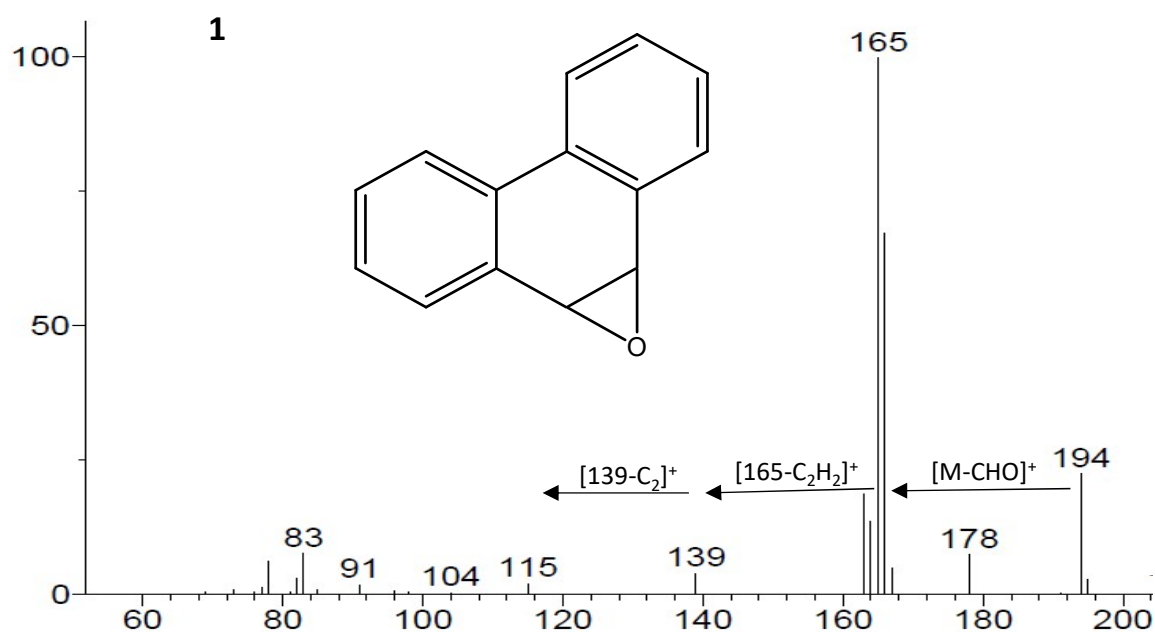

**Supplementary Figure S6.** Intermediates of the phenanthrene depletion by *P. veronii* isolate SM-20: **9,10-Phenanthrene-1,2-dione**

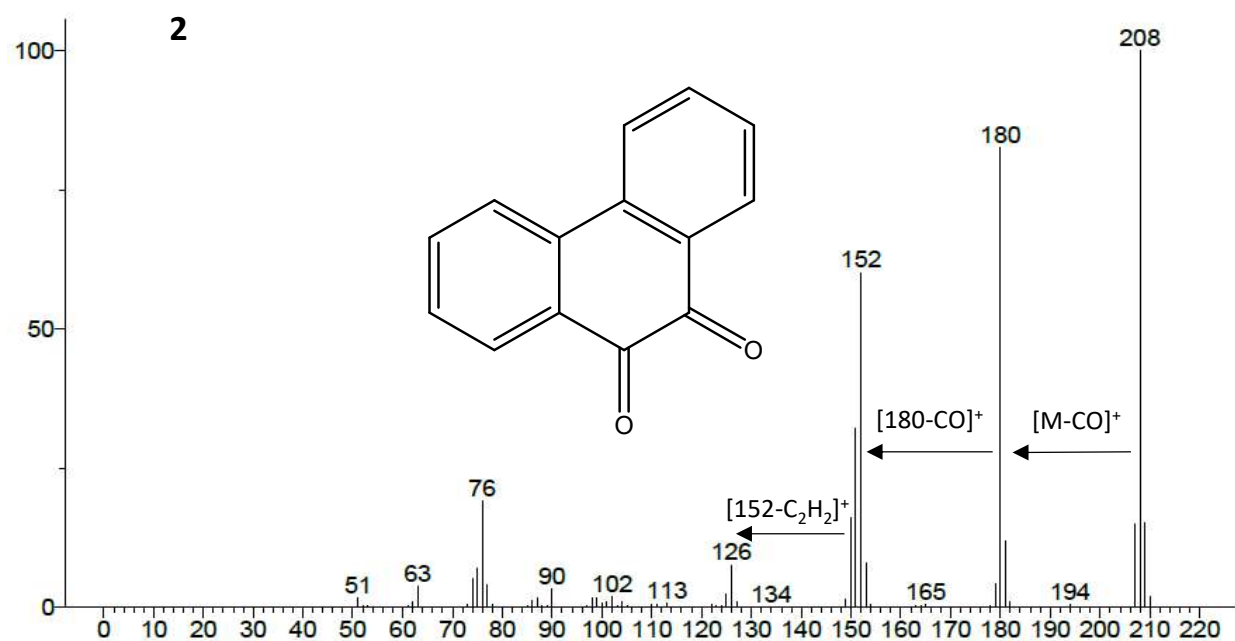

**Supplementary Figure S7.** Intermediates of the phenanthrene depletion by *P. veronii* isolate SM-20: **o-Hydroxybiphenyl**

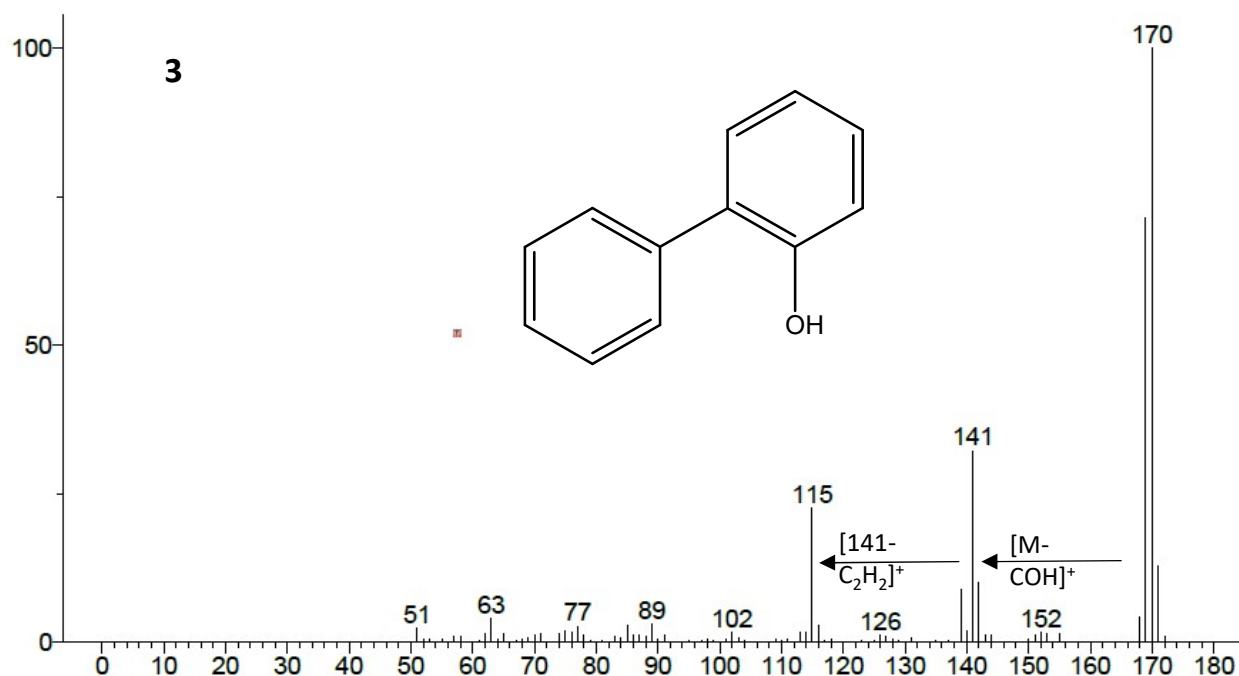

**Supplementary Figure S8.** Intermediates of the phenanthrene depletion by *P. veronii* isolate SM-20: **Phthalic anhydride**

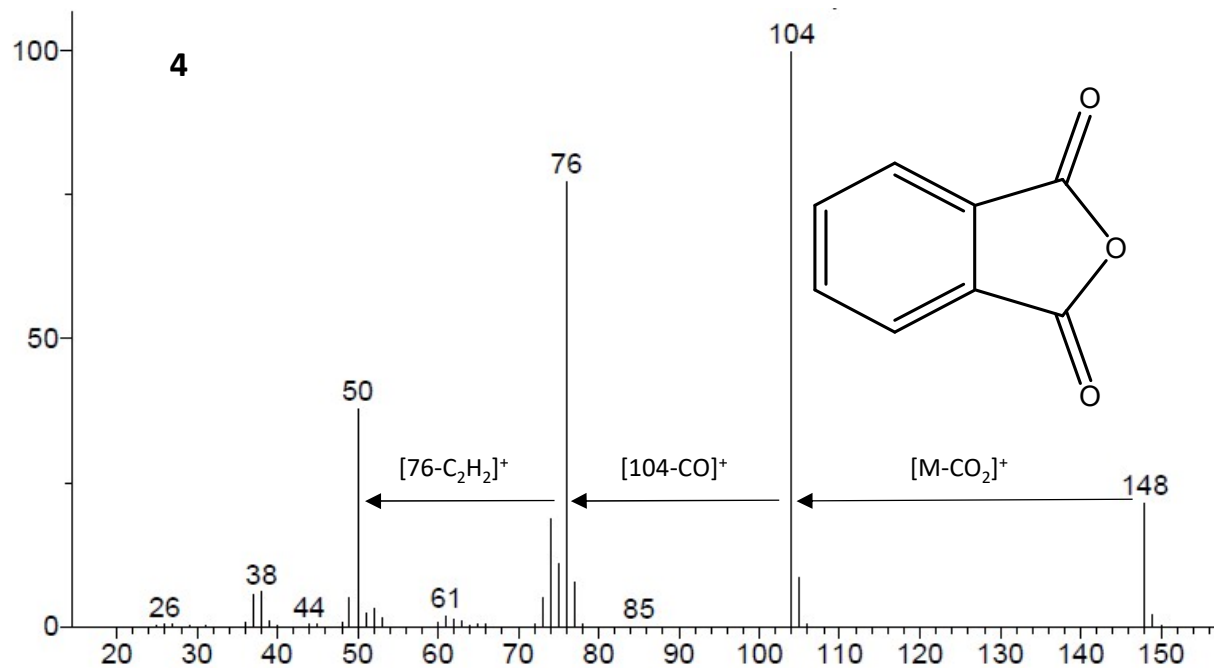

**Supplementary Figure S9.** Intermediates of the phenanthrene depletion by *P. veronii* isolate SM-20: **2-Coumaranone**

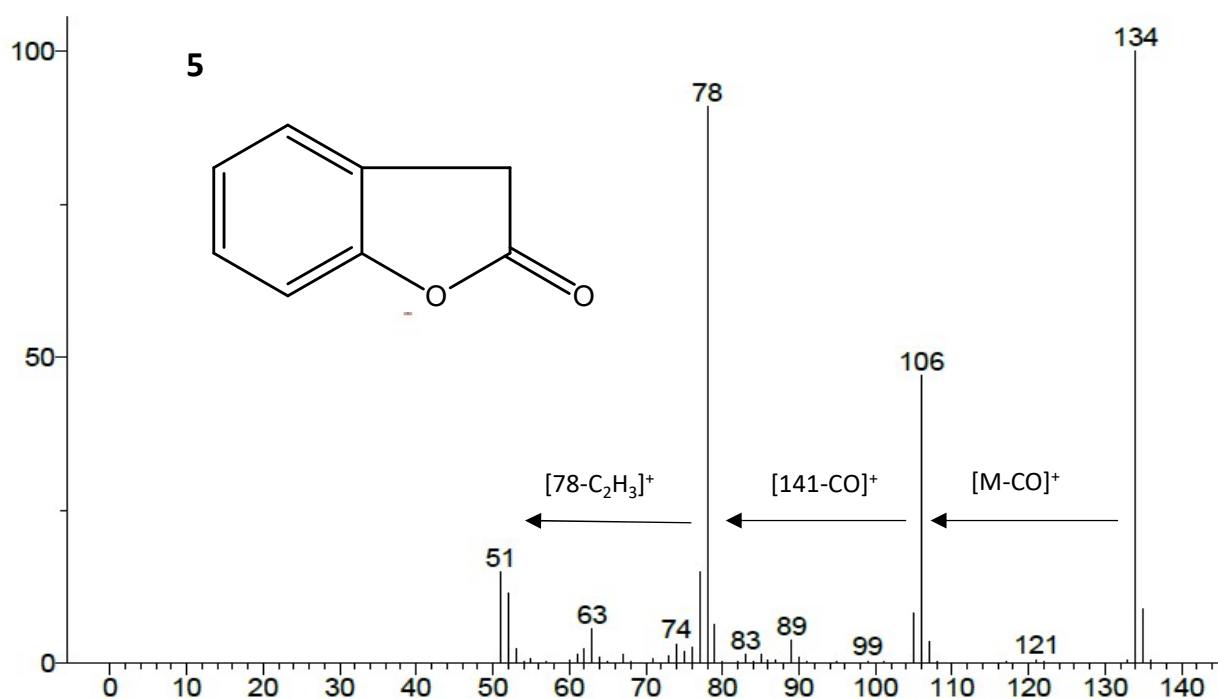

Supplement: s1 [file s1]
