# Supplementary material for: Proteogenomic Characterization of Pseudomonas veronii SM-20 Growing on Phenanthrene as Only Carbon and Energy Source
Source: MDPI journal article supplement (doi:10.3390/microorganisms12040753), 2024-04-08
Supplement: s1 [file s1]

## Chapter S2

### Supplementary materials

# Proteogenomic characterization of *Pseudomonas veronii* SM-20 growing on phenanthrene as only carbon and energy source

Sofía G. Zavala-Meneses<sup>\*1,2</sup>, Andrea Firrincieli<sup>3</sup>, Petra Chalova<sup>4,5</sup>, Petr Pajer<sup>6</sup>, Alice Checcucci<sup>7</sup>, Ludovit Skultety<sup>\*1,4</sup>, Martina Cappelletti<sup>3</sup>

<sup>1</sup> Institute of Microbiology, Czech Academy of Sciences, Videnska 1083, 14220, Prague, Czech Republic

<sup>2</sup> Charles University, Faculty of Science, Vinicna 5, 12844, Prague, Czech Republic

<sup>3</sup> Department of Pharmacy and Biotechnology, University of Bologna, 40126 Bologna, Italy; andrea.firrincieli3@unibo.it or andrea.firrincieli@unitus.it (A.F.); martina.cappelletti2@unibo.it (M.C.)

<sup>4</sup> Biomedical Research Center, Slovak Academy of Sciences, Dubravska c. 9, 845 05 Bratislava, Slovakia; petra.chalova@savba.sk

<sup>5</sup> Faculty of Pharmacy, Comenius University, Odbojarov 10, 832 32 Bratislava, Slovakia

<sup>6</sup> Military Health Institute, Military Medical Agency, U Vojenske nemocnice 1200, 169 02 Prague, Czech Republic; petr.pajer@img.cas.cz

<sup>7</sup> Department of Agriculture, Food, Environment and Forestry, University of Florence, 50100 Firenze, Italy; alice.checcucci@unifi.it

\* Correspondence: szavala.meneses@biomed.cas.cz (S.G.Z.-M.); viruludo@savba.sk (L.S.)

**Supplementary Table S3. Full list of *P. veronii* proteins identified and quantified using comprehensive reverse phase UHPLC profiling and label-free mass spectrometry.** It shows identification details, quantitative measures, and statistic scores. ANOVA and Tukey’s HSD that satisfied the thresholds are highlighted in green. Log2 transformed ratios of absolute fold change above 1.8 and Accessions, which fitted the Tukey’s HSD thresholds and the fold chane ratio are highlighted in orange)

| UNIPROT<br>Accession | Peptides<br>(unique) | Confidence<br>score | Anova (p)* | Normalised abundance |          |          |                |          |          |               |          |          | Turkey's HSD test |              |               | Fold change (log2) Ratios |          |           |
|----------------------|----------------------|---------------------|------------|----------------------|----------|----------|----------------|----------|----------|---------------|----------|----------|-------------------|--------------|---------------|---------------------------|----------|-----------|
|                      |                      |                     |            | Control              |          |          | Exposed_15days |          |          | Exposed_30dpi |          |          | 15days vs. C      | 30days vs. C | 15 vs. 30days | 15days/C                  | 30days/C | 15/30days |
|                      |                      |                     |            | R1                   | R2       | R3       | R1             | R2       | R3       | R1            | R2       | R3       |                   |              |               |                           |          |           |
| AOA1D3JPF4           | 12 (4)               | 78.8                | 1.90E-01   | 3.49E+05             | 4.37E+05 | 4.44E+05 | 2.84E+05       | 3.37E+05 | 3.88E+05 | 3.52E+05      | 3.76E+05 | 3.67E+05 | 1.72E-01          | 4.60E-01     | 7.06E-01      | -0.29                     | -0.17    | 0.12      |
| AOA1D3JP11           | 10 (2)               | 50.6                | NA         | NA                   | NA       | NA       | NA             | NA       | NA       | NA            | NA       | NA       | NA                | NA           | NA            | NA                        | NA       | NA        |
| AOA1D3JPJ0           | 7 (2)                | 51.2                | 9.56E-01   | 1.65E+05             | 1.42E+05 | 1.72E+05 | 1.39E+05       | 1.43E+05 | 1.11E+05 | 3.97E+05      | 0.00E+00 | 0.00E+00 | 9.62E-01          | 9.65E-01     | 1.00E+00      | -0.29                     | -0.27    | 0.01      |
| AOA1D3JPK6           | 3 (1)                | 10.8                | 1.31E-01   | 4.41E+03             | 4.38E+03 | 5.21E+03 | 5.18E+03       | 5.41E+03 | 6.63E+03 | 4.97E+03      | 5.25E+03 | 5.43E+03 | 1.14E-01          | 4.77E-01     | 5.07E-01      | 0.30                      | 0.16     | -0.14     |
| AOA1D3JPL1           | 4 (1)                | 32.9                | 4.47E-03   | 1.65E+04             | 1.16E+04 | 1.33E+04 | 2.29E+04       | 1.98E+04 | 2.39E+04 | 2.18E+04      | 2.24E+04 | 1.99E+04 | 5.88E-03          | 9.56E-03     | 8.83E-01      | 0.69                      | 0.63     | -0.05     |
| AOA1D3JPL2           | 10 (1)               | 52.0                | 7.07E-04   | 4.92E+03             | 5.04E+03 | 5.75E+03 | 4.74E+03       | 4.62E+03 | 4.06E+03 | 1.77E+03      | 2.56E+03 | 9.55E+02 | 3.00E-01          | 7.35E-04     | 2.76E-03      | -0.23                     | -1.57    | -1.34     |
| AOA1D3JPL6           | 4 (1)                | 24.2                | 7.09E-01   | 1.82E+04             | 3.09E+04 | 2.57E+04 | 2.67E+04       | 2.29E+04 | 4.03E+04 | 1.56E+04      | 3.47E+04 | 2.41E+04 | 7.57E-01          | 1.00E+00     | 7.45E-01      | 0.27                      | -0.01    | -0.27     |
| AOA1D3JPN3           | 6 (1)                | 37.9                | NA         | NA                   | NA       | NA       | NA             | NA       | NA       | NA            | NA       | NA       | NA                | NA           | NA            | NA                        | NA       | NA        |
| AOA1D3JPP4           | 7 (3)                | 44.4                | 9.90E-03   | 3.32E+04             | 3.60E+04 | 3.43E+04 | 8.10E+04       | 7.89E+04 | 1.15E+05 | 4.10E+04      | 4.64E+04 | 7.22E+04 | 8.86E-03          | 3.55E-01     | 4.85E-02      | 1.41                      | 0.62     | -0.79     |
| AOA1D3JPP9           | 2 (0)                | 11.8                | NA         | NA                   | NA       | NA       | NA             | NA       | NA       | NA            | NA       | NA       | NA                | NA           | NA            | NA                        | NA       | NA        |
| AOA1D3JPQ0           | 5 (1)                | 34.9                | NA         | NA                   | NA       | NA       | NA             | NA       | NA       | NA            | NA       | NA       | NA                | NA           | NA            | NA                        | NA       | NA        |
| AOA1D3JPQ1           | 4 (1)                | 58.6                | 2.04E-03   | 6.63E+04             | 5.86E+04 | 8.54E+04 | 1.39E+05       | 1.33E+05 | 1.18E+05 | 9.10E+04      | 1.08E+05 | 9.34E+04 | 1.64E-03          | 5.89E-02     | 3.03E-02      | 0.89                      | 0.48     | -0.42     |
| AOA1D3JPQ6           | 2 (1)                | 65.7                | NA         | NA                   | NA       | NA       | NA             | NA       | NA       | NA            | NA       | NA       | NA                | NA           | NA            | NA                        | NA       | NA        |
| AOA1D3JPR1           | 2 (1)                | 12.1                | 1.82E-02   | 4.37E+04             | 2.92E+04 | 3.54E+04 | 4.94E+04       | 5.32E+04 | 4.31E+04 | 5.34E+04      | 5.20E+04 | 5.24E+04 | 5.60E-02          | 1.81E-02     | 6.29E-01      | 0.43                      | 0.54     | 0.11      |
| AOA1D3JPR5           | 4 (0)                | 24.9                | NA         | NA                   | NA       | NA       | NA             | NA       | NA       | NA            | NA       | NA       | NA                | NA           | NA            | NA                        | NA       | NA        |
| AOA1D3JPS1           | 3 (1)                | 14.4                | 1.01E-01   | 5.90E+02             | 3.67E+02 | 0.00E+00 | 0.00E+00       | 0.00E+00 | 0.00E+00 | 0.00E+00      | 0.00E+00 | 0.00E+00 | 1.37E-01          | 1.37E-01     | 1.00E+00      | 0.00                      | 0.00     | 0.00      |
| AOA1D3JPS8           | 3 (1)                | 43.7                | NA         | NA                   | NA       | NA       | NA             | NA       | NA       | NA            | NA       | NA       | NA                | NA           | NA            | NA                        | NA       | NA        |
| AOA1D3JPT2           | 6 (1)                | 39.1                | 3.94E-01   | 2.05E+02             | 1.63E+03 | 7.43E+02 | 4.38E+02       | 6.89E+02 | 3.58E+03 | 7.25E-01      | 5.52E+02 | 1.64E+02 | 7.24E-01          | 7.77E-01     | 3.65E-01      | 0.87                      | -1.85    | -2.72     |
| AOA1D3JPT7           | 20 (3)               | 85.7                | NA         | NA                   | NA       | NA       | NA             | NA       | NA       | NA            | NA       | NA       | NA                | NA           | NA            | NA                        | NA       | NA        |
| AOA1D3JPT9           | 4 (1)                | 21.0                | 3.28E-05   | 1.47E+02             | 1.67E+02 | 1.22E+02 | 2.18E+02       | 1.37E+02 | 1.78E+02 | 6.33E+02      | 6.95E+02 | 8.09E+02 | 7.85E-01          | 5.04E-05     | 7.05E-05      | -0.35                     | 2.80     | 3.15      |
| AOA1D3JPU4           | 13 (4)               | 85.9                | 5.86E-02   | 4.58E+05             | 4.00E+05 | 4.20E+05 | 2.86E+05       | 3.06E+05 | 1.99E+05 | 4.04E+05      | 2.96E+05 | 2.09E+05 | 5.83E-02          | 1.43E-01     | 7.69E-01      | -0.69                     | -0.49    | 0.20      |
| AOA1D3JPU5           | 15 (3)               | 85.9                | 7.27E-01   | 1.93E+03             | 1.04E+04 | 4.50E+03 | 4.45E+03       | 3.28E+03 | 1.19E+04 | 0.00E+00      | 3.29E+03 | 7.82E+03 | 9.63E-01          | 8.54E-01     | 7.15E-01      | 0.22                      | -0.60    | -0.82     |
| AOA1D3JPU8           | 2 (1)                | 9.9                 | 6.90E-01   | 9.88E+03             | 8.24E+03 | 9.22E+03 | 8.94E+03       | 8.71E+03 | 7.15E+03 | 8.41E+03      | 7.57E+03 | 1.20E+04 | 7.90E-01          | 9.83E-01     | 6.93E-01      | -0.14                     | 0.03     | 0.17      |
| AOA1D3JPX3           | 31 (7)               | 200.5               | 1.86E-01   | 2.22E+05             | 1.80E+05 | 2.16E+05 | 1.73E+05       | 1.96E+05 | 1.58E+05 | 2.27E+05      | 2.01E+05 | 1.91E+05 | 2.37E-01          | 1.00E+00     | 2.35E-01      | -0.23                     | 0.00     | 0.23      |
| AOA1D3JPY5           | 3 (2)                | 10.7                | 8.78E-01   | 5.99E+03             | 1.13E+04 | 8.93E+03 | 6.33E+03       | 5.08E+03 | 1.38E+04 | 4.22E+03      | 8.31E+03 | 9.46E+03 | 9.93E-01          | 8.77E-01     | 9.26E-01      | -0.06                     | -0.25    | -0.20     |
| AOA1D3JPY6           | 6 (2)                | 23.9                | 3.59E-03   | 1.58E+05             | 1.34E+05 | 1.64E+05 | 2.50E+05       | 2.56E+05 | 2.18E+05 | 2.08E+05      | 2.28E+05 | 2.57E+05 | 4.56E-03          | 8.29E-03     | 8.22E-01      | 0.67                      | 0.60     | -0.06     |
| AOA1D3JPY9           | 16 (7)               | 136.2               | 4.14E-01   | 1.33E+06             | 1.22E+06 | 1.11E+06 | 1.26E+06       | 0.00E+00 | 1.25E+06 | 8.47E+05      | 7.84E+05 | 6.16E+05 | 5.50E-01          | 4.24E-01     | 9.67E-01      | -0.55                     | -0.70    | -0.16     |
| AOA1D3JPZ3           | 9 (3)                | 45.3                | 5.59E-02   | 1.82E+05             | 1.60E+05 | 1.68E+05 | 1.21E+05       | 1.30E+05 | 1.07E+05 | 1.70E+05      | 1.19E+05 | 1.13E+05 | 5.27E-02          | 1.60E-01     | 6.71E-01      | -0.51                     | -0.34    | 0.17      |
| AOA1D3JPZ6           | 7 (2)                | 47.0                | 2.36E-01   | 1.45E+03             | 7.18E+03 | 5.49E+03 | 1.23E+03       | 1.18E+03 | 4.41E+03 | 2.40E+03      | 3.77E+02 | 1.91E+03 | 3.90E-01          | 2.37E-01     | 9.10E-01      | -1.05                     | -1.59    | -0.54     |
| AOA1D3JQ04           | 4 (1)                | 26.6                | 2.49E-01   | 9.75E+03             | 1.23E+04 | 1.37E+04 | 8.41E+03       | 8.94E+03 | 5.81E+03 | 0.00E+00      | 1.20E+04 | 7.00E+03 | 4.18E-01          | 2.46E-01     | 8.96E-01      | -0.63                     | -0.91    | -0.29     |
| AOA1D3JQ11           | 6 (1)                | 44.1                | 2.29E-02   | 2.42E+03             | 3.41E+03 | 2.43E+03 | 4.14E+03       | 3.07E+03 | 4.20E+03 | 8.50E+03      | 5.81E+03 | 4.90E+03 | 5.54E-01          | 2.15E-02     | 8.04E-02      | 1.93                      | 0.72     | -1.21     |
| AOA1D3JQ20           | 4 (1)                | 22.9                | 8.64E-01   | 3.02E+03             | 6.19E+03 | 5.18E+03 | 3.88E+03       | 4.08E+03 | 1.07E+04 | 1.73E+02      | 6.24E+03 | 8.51E+03 | 8.73E-01          | 9.98E-01     | 9.01E-01      | 0.37                      | 0.05     | -0.32     |
| AOA1D3JQ23           | 2 (2)                | 10.5                | 2.84E-02   | 8.02E+04             | 6.43E+04 | 6.93E+04 | 4.95E+04       | 5.01E+04 | 3.62E+04 | 6.07E+04      | 3.79E+04 | 4.91E+04 | 3.22E-02          | 6.12E-02     | 8.62E-01      | -0.65                     | -0.53    | 0.12      |
| AOA1D3JQ27           | 17 (4)               | 134.6               | 3.83E-03   | 5.22E+04             | 4.90E+04 | 4.70E+04 | 1.21E+05       | 1.42E+05 | 1.98E+05 | 6.51E+04      | 6.63E+04 | 8.23E+04 | 4.03E-03          | 5.31E-01     | 1.26E-02      | 1.64                      | 0.53     | -1.11     |
| AOA1D3JQ35           | 7 (1)                | 31.2                | 5.20E-01   | 2.02E+04             | 1.57E+04 | 2.08E+04 | 1.66E+04       | 1.75E+04 | 1.18E+04 | 2.22E+04      | 1.28E+04 | 9.86E+03 | 6.09E-01          | 5.51E-01     | 9.94E-01      | -0.30                     | -0.34    | -0.04     |
| AOA1D3JQ49           | 2 (1)                | 9.1                 | 6.57E-03   | 3.11E+04             | 2.22E+04 | 2.71E+04 | 3.30E+04       | 3.28E+04 | 2.99E+04 | 4.51E+04      | 4.48E+04 | 3.71E+04 | 3.00E-01          | 5.85E-03     | 3.51E-02      | 0.25                      | 0.66     | 0.41      |
| AOA1D3JQ52           | 41 (6)               | 86.5                | NA         | NA                   | NA       | NA       | NA             | NA       | NA       | NA            | NA       | NA       | NA                | NA           | NA            | NA                        | NA       | NA        |
| AOA1D3JQ54           | 3 (0)                | 14.5                | NA         | NA                   | NA       | NA       | NA             | NA       | NA       | NA            | NA       | NA       | NA                | NA           | NA            | NA                        | NA       | NA        |
| AOA1D3JQ60           | 2 (0)                | 9.5                 | NA         | NA                   | NA       | NA       | NA             | NA       | NA       | NA            | NA       | NA       | NA                | NA           | NA            | NA                        | NA       | NA        |
| AOA1D3JQ61           | 3 (2)                | 21.1                | 6.86E-01   | 1.43E+04             | 1.62E+04 | 1.94E+04 | 1.46E+04       | 1.85E+04 | 1.31E+04 | 2.71E+04      | 1.81E+04 | 1.17E+04 | 9.50E-01          | 8.37E-01     | 6.70E-01      | -0.11                     | 0.19     | 0.30      |
| AOA1D3JQ62           | 15 (6)               | 111.9               | 1.82E-01   | 1.57E+06             | 1.21E+06 | 1.54E+06 | 1.07E+06       | 1.23E+06 | 9.09E+05 | 1.53E+06      | 1.33E+06 | 1.01E+06 | 1.64E-01          | 6.84E-01     | 4.60E-01      | -0.43                     | -0.16    | 0.27      |
| AOA1D3JQ68           | 27 (12)              | 212.4               | 3.10E-03   | 1.48E+06             | 1.22E+06 | 1.35E+06 | 8.97E+05       | 9.89E+05 | 8.13E+05 | 9.78E+05      | 8.21E+05 | 7.45E+05 | 6.92E-03          | 4.05E-03     | 8.48E-01      | -0.59                     | -0.67    | -0.09     |
| AOA1D3JQ71           | 4 (1)                | 21.9                | 1.46E-01   | 2.23E+04             | 2.03E+04 | 2.53E+04 | 1.67E+04       | 1.71E+04 | 1.57E+04 | 2.30E+04      | 1.61E+04 | 1.18E+04 | 1.73E-01          | 2.10E-01     | 9.87E-01      | -0.46                     | -0.42    | 0.04      |
| AOA1D3JQ78           | 3 (1)                | 15.5                | 2.36E-03   | 4.14E+03             | 4.36E+03 | 4.46E+03 | 1.07E+04       | 9.47E+03 | 1.25E+04 | 8.16E+03      | 9.55E+03 | 1.18E+04 | 2.71E-03          | 6.68E-03     | 6.26E-01      | 1.34                      | 1.19     | -0.15     |
| AOA1D3JQ85           | 20 (6)               | 170.4               | 3.39E-04   | 2.65E+05             | 2.12E+05 | 2.37E+05 | 3.56E+05       | 3.90E+05 | 3.51E+05 | 2.01E+05      | 1.96E+05 | 2.32E+05 | 1.13E-03          | 3.52E-01     | 3.83E-04      | 0.62                      | -0.18    | -0.80     |

|            |         |       |          |          |          |          |          |          |          |          |          |          |          |          |          |       |       |       |
|------------|---------|-------|----------|----------|----------|----------|----------|----------|----------|----------|----------|----------|----------|----------|----------|-------|-------|-------|
| A0A1D3JQ86 | 2 (0)   | 10.2  | NA       | NA    | NA    | NA    |
| A0A1D3JQ87 | 15 (2)  | 77.9  | 9.32E-01 | 7.73E+04 | 7.23E+04 | 8.24E+04 | 8.79E+04 | 9.02E+04 | 8.43E+04 | 1.37E+05 | 1.36E+05 | 0.00E+00 | 9.60E-01 | 9.30E-01 | 9.95E-01 | 0.18  | 0.23  | 0.06  |
| A0A1D3JQA3 | 8 (0)   | 51.5  | NA       | NA    | NA    | NA    |
| A0A1D3JQA5 | 9 (1)   | 76.9  | NA       | NA    | NA    | NA    |
| A0A1D3JQA7 | 11 (1)  | 56.5  | 4.55E-01 | 3.89E+03 | 6.77E+03 | 3.59E+03 | 3.27E+03 | 4.54E+03 | 5.88E+03 | 0.00E+00 | 5.61E+03 | 2.53E+03 | 9.93E-01 | 4.88E-01 | 5.46E-01 | -0.06 | -0.81 | -0.75 |
| A0A1D3JQB0 | 21 (7)  | 119.1 | 2.85E-01 | 4.32E+05 | 4.37E+05 | 4.07E+05 | 7.07E+05 | 5.90E+05 | 3.78E+05 | 5.36E+05 | 5.75E+05 | 5.01E+05 | 3.00E-01 | 4.06E-01 | 9.64E-01 | 0.39  | 0.34  | -0.06 |
| A0A1D3JQB2 | 59 (25) | 338.4 | 8.50E-04 | 2.31E+06 | 1.80E+06 | 2.16E+06 | 2.50E+06 | 2.69E+06 | 2.27E+06 | 4.79E+06 | 4.45E+06 | 6.07E+06 | 6.49E-01 | 1.06E-03 | 2.24E-03 | 0.25  | 1.29  | 1.04  |
| A0A1D3JQC6 | 37 (7)  | 145.7 | 2.44E-04 | 5.56E+03 | 3.05E+03 | 3.91E+03 | 8.94E+03 | 7.77E+03 | 7.58E+03 | 1.22E+04 | 1.07E+04 | 1.18E+04 | 5.70E-03 | 1.93E-04 | 1.03E-02 | 0.96  | 0.94  | -0.02 |
| A0A1D3JQD1 | 14 (7)  | 76.7  | 4.48E-01 | 3.18E+05 | 2.74E+05 | 2.96E+05 | 3.51E+05 | 3.64E+05 | 3.09E+05 | 3.76E+05 | 3.36E+05 | 2.55E+05 | 4.22E-01 | 7.24E-01 | 8.44E-01 | 0.21  | 0.12  | -0.08 |
| A0A1D3JQD4 | 2 (1)   | 19.5  | 2.22E-01 | 1.35E+03 | 1.70E+03 | 1.23E+03 | 2.04E+03 | 1.83E+03 | 4.69E+03 | 1.39E+03 | 1.93E+03 | 1.68E+03 | 2.34E-01 | 9.50E-01 | 3.40E-01 | 1.00  | 0.22  | -0.78 |
| A0A1D3JQE3 | 14 (3)  | 72.8  | 9.73E-01 | 4.40E+04 | 5.06E+04 | 5.19E+04 | 5.43E+04 | 5.34E+04 | 6.52E+04 | 0.00E+00 | 0.00E+00 | 1.50E+05 | 9.75E-01 | 1.00E+00 | 9.81E-01 | 0.24  | 0.03  | -0.21 |
| A0A1D3JQE4 | 17 (3)  | 100.2 | 1.83E-01 | 5.11E+05 | 3.75E+05 | 4.94E+05 | 3.66E+05 | 4.07E+05 | 2.65E+05 | 4.34E+05 | 3.64E+05 | 3.26E+05 | 1.81E-01 | 3.39E-01 | 8.69E-01 | -0.41 | -0.30 | 0.11  |
| A0A1D3JQE6 | 12 (3)  | 74.5  | 6.93E-01 | 2.56E+05 | 2.04E+05 | 2.27E+05 | 2.58E+05 | 2.77E+05 | 1.94E+05 | 2.85E+05 | 2.31E+05 | 2.44E+05 | 8.67E-01 | 6.72E-01 | 9.31E-01 | 0.59  | 0.50  | -0.09 |
| A0A1D3JQE9 | 9 (1)   | 53.6  | 6.82E-01 | 1.15E+04 | 8.76E+03 | 1.39E+04 | 7.49E+03 | 6.94E+03 | 3.38E+03 | 0.00E+00 | 2.33E+04 | 4.04E+03 | 6.60E-01 | 9.25E-01 | 8.64E-01 | -0.94 | -0.32 | 0.62  |
| A0A1D3JQG4 | 5 (2)   | 28.6  | 9.84E-01 | 8.50E+04 | 7.63E+04 | 8.95E+04 | 7.95E+04 | 8.82E+04 | 4.90E+04 | 0.00E+00 | 2.46E+05 | 0.00E+00 | 9.85E-01 | 1.00E+00 | 9.88E-01 | -0.21 | -0.03 | 0.18  |
| A0A1D3JQH2 | 3 (1)   | 20.5  | 6.89E-01 | 3.58E+03 | 3.85E+03 | 4.06E+03 | 2.71E+03 | 2.44E+03 | 3.19E+03 | 6.30E+02 | 5.38E+03 | 4.69E+03 | 6.85E-01 | 9.75E-01 | 8.04E-01 | -0.46 | -0.10 | 0.36  |
| A0A1D3JQH4 | 14 (2)  | 84.9  | 1.73E-03 | 4.94E+03 | 5.66E+03 | 7.99E+03 | 5.29E+03 | 4.93E+03 | 4.34E+03 | 1.15E+03 | 1.10E+03 | 1.24E+03 | 2.75E-01 | 1.66E-03 | 8.01E-03 | -0.35 | -2.41 | -2.06 |
| A0A1D3JQJ5 | 4 (0)   | 21.0  | NA       | NA    | NA    | NA    |
| A0A1D3JQK4 | 15 (4)  | 85.6  | 7.28E-01 | 1.16E+05 | 9.21E+04 | 1.19E+05 | 1.13E+05 | 1.20E+05 | 9.23E+04 | 1.39E+05 | 1.12E+05 | 1.03E+05 | 9.99E-01 | 7.77E-01 | 7.59E-01 | -0.01 | 0.12  | 0.12  |
| A0A1D3JQK6 | 4 (0)   | 18.7  | NA       | NA    | NA    | NA    |
| A0A1D3JQL2 | 15 (8)  | 101.3 | 3.85E-01 | 1.24E+05 | 1.65E+05 | 1.47E+05 | 1.38E+05 | 1.31E+05 | 2.09E+05 | 1.07E+05 | 1.49E+05 | 1.09E+05 | 8.43E-01 | 6.49E-01 | 3.62E-01 | 0.13  | -0.25 | -0.38 |
| A0A1D3JQL3 | 6 (2)   | 46.8  | 4.06E-01 | 9.06E+02 | 1.93E+03 | 1.12E+03 | 2.18E+03 | 9.71E+02 | 4.65E+03 | 5.25E+02 | 2.25E+03 | 1.30E+03 | 4.57E-01 | 9.99E-01 | 4.77E-01 | 0.98  | 0.04  | -0.94 |
| A0A1D3JQM4 | 9 (1)   | 47.6  | 1.15E-05 | 3.26E+03 | 2.82E+03 | 3.79E+03 | 0.00E+00 | 8.91E+01 | 0.00E+00 | 1.09E+02 | 9.72E+01 | 0.00E+00 | 1.99E-05 | 2.14E-05 | 9.85E-01 | -6.79 | -5.58 | 1.21  |
| A0A1D3JQM5 | 21 (2)  | 115.1 | 7.97E-01 | 5.19E+04 | 4.88E+04 | 4.86E+04 | 3.83E+04 | 4.18E+04 | 3.38E+04 | 7.37E+04 | 4.97E+04 | 0.00E+00 | 7.92E-01 | 8.81E-01 | 9.83E-01 | -0.39 | -0.28 | 0.12  |
| A0A1D3JQN4 | 7 (3)   | 45.3  | 1.48E-02 | 4.59E+04 | 3.37E+04 | 3.82E+04 | 2.47E+04 | 2.60E+04 | 1.89E+04 | 2.81E+04 | 2.17E+04 | 1.54E+04 | 2.81E-02 | 1.93E-02 | 9.44E-01 | -0.76 | -0.85 | -0.09 |
| A0A1D3JQP1 | 6 (2)   | 55.9  | 5.06E-01 | 3.44E+04 | 2.90E+04 | 3.41E+04 | 5.85E+04 | 5.77E+04 | 5.57E+04 | 9.97E+04 | 0.00E+00 | 8.56E+04 | 6.18E-01 | 5.23E-01 | 9.84E-01 | 0.82  | 0.93  | 0.11  |
| A0A1D3JQP4 | 51 (11) | 311.9 | 3.39E-01 | 2.84E+05 | 2.37E+05 | 2.67E+05 | 3.38E+05 | 3.53E+05 | 2.85E+05 | 3.62E+05 | 2.54E+05 | 2.19E+05 | 3.36E-01 | 9.23E-01 | 5.13E-01 | 0.31  | 0.08  | -0.23 |
| A0A1D3JQP5 | 28 (8)  | 218.3 | 3.38E-02 | 4.07E+05 | 4.09E+05 | 4.56E+05 | 4.70E+05 | 4.67E+05 | 4.83E+05 | 3.65E+05 | 4.37E+05 | 3.74E+05 | 1.65E-01 | 4.02E-01 | 2.91E-02 | 0.16  | -0.11 | -0.27 |
| A0A1D3JQQ0 | 22 (3)  | 114.8 | 6.87E-01 | 1.94E+04 | 1.58E+04 | 1.58E+04 | 1.40E+04 | 1.47E+04 | 1.05E+04 | 2.07E+04 | 1.70E+04 | 0.00E+00 | 7.60E-01 | 7.07E-01 | 9.95E-01 | -0.38 | -0.43 | -0.06 |
| A0A1D3JQR5 | 8 (1)   | 40.7  | 6.47E-01 | 6.56E+01 | 1.79E+03 | 1.10E+02 | 2.08E+02 | 3.26E+01 | 2.41E+03 | 0.00E+00 | 0.00E+00 | 4.21E+02 | 9.55E-01 | 7.96E-01 | 6.34E-01 | 0.43  | -2.23 | -2.66 |
| A0A1D3JQT2 | 18 (3)  | 104.9 | 4.98E-02 | 2.49E+04 | 4.04E+04 | 2.93E+04 | 1.22E+04 | 1.15E+04 | 2.76E+04 | 1.24E+04 | 1.65E+04 | 1.33E+04 | 1.04E-01 | 5.41E-02 | 8.64E-01 | -0.88 | -1.16 | -0.28 |
| A0A1D3JQT8 | 7 (3)   | 43.5  | 1.91E-01 | 1.72E+05 | 1.29E+05 | 1.55E+05 | 1.16E+05 | 1.36E+05 | 7.67E+04 | 2.25E+05 | 1.64E+05 | 1.22E+05 | 3.85E-01 | 8.16E-01 | 1.82E-01 | -0.47 | 0.16  | 0.64  |
| A0A1D3JQU0 | 2 (0)   | 11.8  | NA       | NA    | NA    | NA    |
| A0A1D3JQU3 | 8 (1)   | 12.5  | 5.39E-01 | 1.09E+04 | 6.45E+03 | 6.95E+03 | 7.08E+03 | 5.70E+03 | 6.65E+03 | 5.24E+03 | 7.64E+03 | 8.21E+03 | 5.20E-01 | 7.39E-01 | 9.20E-01 | -0.32 | -0.20 | 0.12  |
| A0A1D3JQU4 | 16 (6)  | 98.3  | 3.00E-02 | 3.19E+05 | 2.69E+05 | 3.09E+05 | 3.41E+05 | 3.47E+05 | 3.26E+05 | 4.30E+05 | 3.48E+05 | 3.77E+05 | 2.98E-01 | 2.51E-02 | 1.94E-01 | 0.18  | 0.37  | 0.19  |
| A0A1D3JQU6 | 6 (2)   | 19.2  | 1.75E-01 | 5.88E+04 | 4.86E+04 | 6.63E+04 | 4.56E+04 | 5.12E+04 | 3.27E+04 | 5.49E+04 | 4.70E+04 | 4.10E+04 | 1.66E-01 | 3.65E-01 | 8.03E-01 | -0.42 | -0.28 | 0.14  |
| A0A1D3JQU8 | 5 (1)   | 36.0  | 3.44E-01 | 3.01E+02 | 9.19E+02 | 6.34E+02 | 4.76E+02 | 3.24E+02 | 1.00E+03 | 0.00E+00 | 4.53E+02 | 3.42E+02 | 9.97E-01 | 3.90E-01 | 4.21E-01 | -0.04 | -1.22 | -1.18 |
| A0A1D3JQV8 | 18 (3)  | 67.9  | NA       | NA    | NA    | NA    |
| A0A1D3JQW0 | 2 (0)   | 9.5   | NA       | NA    | NA    | NA    |
| A0A1D3JQW6 | 2 (0)   | 14.3  | NA       | NA    | NA    | NA    |
| A0A1D3JQW8 | 2 (0)   | 11.3  | NA       | NA    | NA    | NA    |
| A0A1D3JQX6 | 10 (6)  | 62.6  | 8.18E-01 | 6.81E+05 | 5.12E+05 | 6.40E+05 | 5.80E+05 | 4.71E+05 | 5.24E+05 | 3.56E+05 | 5.21E+05 | 9.56E+05 | 8.46E-01 | 1.00E+00 | 8.46E-01 | -0.22 | 0.00  | 0.22  |
| A0A1D3JQX8 | 18 (5)  | 124.2 | 5.52E-02 | 3.55E+04 | 3.58E+04 | 3.92E+04 | 4.42E+04 | 4.53E+04 | 5.82E+04 | 4.38E+04 | 5.15E+04 | 5.69E+04 | 9.70E-02 | 6.60E-02 | 9.50E-01 | 0.42  | 0.46  | 0.04  |
| A0A1D3JQZ1 | 5 (2)   | 30.7  | 8.26E-01 | 2.96E+03 | 3.35E+03 | 3.57E+03 | 3.24E+03 | 2.83E+03 | 5.60E+03 | 0.00E+00 | 5.15E+03 | 3.83E+03 | 9.12E-01 | 9.77E-01 | 8.16E-01 | 0.24  | -0.14 | -0.38 |
| A0A1D3JQZ2 | 13 (3)  | 70.5  | 1.51E-01 | 1.10E+05 | 9.41E+04 | 9.88E+04 | 7.54E+04 | 8.31E+04 | 6.83E+04 | 9.84E+04 | 5.95E+04 | 9.36E+04 | 1.41E-01 | 3.47E-01 | 7.57E-01 | -0.42 | -0.27 | 0.15  |
| A0A1D3JQZ5 | 28 (9)  | 262.9 | 1.31E-03 | 8.15E+05 | 6.45E+05 | 7.14E+05 | 1.25E+06 | 1.37E+06 | 1.09E+06 | 1.12E+06 | 1.19E+06 | 1.14E+06 | 1.51E-03 | 3.87E-03 | 5.58E-01 | 0.77  | 0.67  | -0.10 |
| A0A1D3JR00 | 29 (8)  | 167.8 | 7.59E-01 | 2.30E+05 | 1.83E+05 | 2.05E+05 | 2.19E+05 | 2.19E+05 | 2.08E+05 | 2.42E+05 | 1.85E+05 | 1.71E+05 | 9.00E-01 | 9.47E-01 | 7.41E-01 | 0.06  | -0.05 | -0.11 |
| A0A1D3JR12 | 17 (7)  | 106.5 | 5.21E-01 | 2.44E+05 | 1.77E+05 | 2.42E+05 | 1.99E+05 | 2.24E+05 | 2.13E+05 | 2.40E+05 | 2.21E+05 | 2.47E+05 | 8.97E-01 | 7.47E-01 | 4.98E-01 | -0.06 | 0.09  | 0.15  |
| A0A1D3JR13 | 4 (0)   | 29.4  | NA       | NA    | NA    | NA    |
| A0A1D3JR14 | 17 (6)  | 130.9 | 1.01E-01 | 3.00E+05 | 3.00E+05 | 3.06E+05 | 3.45E+05 | 3.32E+05 | 4.13E+05 | 3.26E+05 | 4.18E+05 | 3.83E+05 | 1.84E-01 | 1.08E-01 | 9.10E-01 | 0.27  | 0.32  | 0.05  |
| A0A1D3JR17 | 4 (2)   | 18.2  | 6.88E-01 | 1.49E+05 | 1.66E+05 | 1.39E+05 | 1.36E+05 | 1.36E+05 | 1.85E+05 | 1.65E+05 | 1.65E+05 | 1.44E+05 | 9.77E-01 | 6.85E-01 | 8.00E-01 | -0.03 | -0.15 | -0.11 |
| A0A1D3JR22 | 5 (2)   | 43.1  | 3.03E-01 | 2.05E+04 | 3.24E+04 | 1.81E+04 | 1.41E+04 | 2.51E+04 | 2.96E+04 | 1.75E+04 | 0.00E+00 | 2.00E+04 | 9.94E-01 | 3.42E-01 | 3.85E-01 | -0.05 | -0.92 | -0.88 |

|             |         |       |          |          |          |          |          |          |          |          |          |          |          |          |          |       |       |       |
|-------------|---------|-------|----------|----------|----------|----------|----------|----------|----------|----------|----------|----------|----------|----------|----------|-------|-------|-------|
| AOA1D3JR26  | 24 (9)  | 123.1 | 5.60E-02 | 2.92E+05 | 2.79E+05 | 3.06E+05 | 2.85E+05 | 2.95E+05 | 3.30E+05 | 2.80E+05 | 2.40E+05 | 2.24E+05 | 8.21E-01 | 1.25E-01 | 5.80E-02 | 0.06  | -0.23 | -0.29 |
| AOA1D3JR27  | 10 (1)  | 59.7  | 4.49E-01 | 9.59E+01 | 5.17E+01 | 3.90E+03 | 2.46E+01 | 1.32E+01 | 2.47E+01 | 4.38E+02 | 1.51E+01 | 3.16E+02 | 4.60E-01 | 5.79E-01 | 9.73E-01 | -6.02 | -2.40 | 3.62  |
| AOA1D3JR37  | 5 (2)   | 25.8  | 5.67E-03 | 2.83E+05 | 2.30E+05 | 2.64E+05 | 1.35E+05 | 1.52E+05 | 9.06E+04 | 2.33E+05 | 1.80E+05 | 1.69E+05 | 4.58E-03 | 9.51E-02 | 7.90E-02 | -1.04 | -0.41 | 0.63  |
| AOA1D3JR39  | 12 (3)  | 64.0  | 3.61E-01 | 1.68E+05 | 1.13E+05 | 1.30E+05 | 1.44E+05 | 1.65E+05 | 1.09E+05 | 2.04E+05 | 1.41E+05 | 1.66E+05 | 9.95E-01 | 4.02E-01 | 4.45E-01 | 0.02  | 0.31  | 0.29  |
| AOA1D3JR45  | 3 (2)   | 16.1  | 5.40E-01 | 4.42E+04 | 3.41E+04 | 4.69E+04 | 3.47E+04 | 3.95E+04 | 2.72E+04 | 4.95E+04 | 3.30E+04 | 2.81E+04 | 5.16E-01 | 7.68E-01 | 8.95E-01 | -0.30 | -0.18 | 0.13  |
| AOA1D3JR46  | 5 (0)   | 31.7  | NA       | NA    | NA    | NA    |
| AOA1D3JR49  | 10 (2)  | 62.6  | 4.76E-02 | 1.66E+05 | 1.37E+05 | 1.43E+05 | 1.63E+05 | 1.64E+05 | 1.35E+05 | 2.33E+05 | 1.72E+05 | 1.98E+05 | 9.53E-01 | 5.78E-02 | 8.39E-02 | 0.05  | 0.43  | 0.38  |
| AOA1D3JR62  | 4 (1)   | 22.6  | 5.06E-01 | 3.05E+03 | 2.30E+04 | 3.17E+03 | 7.48E+03 | 7.66E+03 | 3.70E+04 | 7.94E+01 | 6.44E+03 | 9.20E+03 | 7.34E-01 | 8.94E-01 | 4.83E-01 | 0.83  | -0.90 | -1.73 |
| AOA1D3JR63  | 14 (2)  | 115.9 | 7.64E-01 | 2.18E+03 | 7.15E+03 | 3.66E+03 | 4.77E+03 | 3.00E+03 | 1.19E+04 | 5.23E+02 | 8.49E+03 | 5.27E+03 | 7.68E-01 | 9.90E-01 | 8.40E-01 | 0.60  | 0.14  | -0.46 |
| AOA1D3JR74  | 5 (1)   | 56.9  | NA       | NA    | NA    | NA    |
| AOA1D3JR75  | 2 (0)   | 13.4  | NA       | NA    | NA    | NA    |
| AOA1D3JR76  | 3 (2)   | 21.2  | 8.12E-03 | 3.90E+05 | 3.31E+05 | 4.01E+05 | 3.05E+05 | 3.09E+05 | 2.57E+05 | 2.76E+05 | 2.21E+05 | 2.53E+05 | 4.16E-02 | 7.25E-03 | 3.28E-01 | -0.36 | -0.58 | -0.22 |
| AOA1D3JR85  | 6 (1)   | 63.9  | NA       | NA    | NA    | NA    |
| AOA1D3JR88  | 45 (13) | 291.1 | 2.05E-05 | 6.16E+05 | 5.57E+05 | 6.43E+05 | 6.98E+05 | 7.03E+05 | 7.15E+05 | 9.09E+05 | 9.43E+05 | 9.23E+05 | 1.01E-02 | 1.80E-05 | 1.60E-04 | 0.22  | 0.61  | 0.39  |
| AOA1D3JR94  | 4 (1)   | 24.0  | 1.73E-05 | 1.59E+05 | 1.53E+05 | 1.87E+05 | 2.90E+05 | 3.12E+05 | 2.88E+05 | 1.10E+05 | 1.30E+05 | 1.02E+05 | 1.12E-04 | 1.41E-02 | 1.58E-05 | 0.84  | -0.54 | -1.38 |
| AOA1D3JRA5  | 3 (0)   | 9.9   | NA       | NA    | NA    | NA    |
| AOA1D3JRA8  | 12 (1)  | 34.8  | NA       | NA    | NA    | NA    |
| AOA1D3JRA9  | 9 (0)   | 49.6  | NA       | NA    | NA    | NA    |
| AOA1D3JRB0  | 2 (0)   | 8.5   | NA       | NA    | NA    | NA    |
| AOA1D3JRB1  | 16 (8)  | 125.7 | 1.40E-01 | 2.55E+05 | 1.92E+05 | 1.85E+05 | 2.92E+05 | 3.06E+05 | 2.80E+05 | 2.61E+05 | 2.75E+05 | 4.36E+05 | 3.00E-01 | 1.34E-01 | 8.04E-01 | 0.47  | 0.62  | 0.15  |
| AOA1D3JRB2  | 8 (2)   | 44.7  | 6.82E-01 | 2.65E+02 | 6.47E+03 | 2.93E+02 | 3.03E+02 | 1.72E+02 | 5.72E+03 | 1.01E+02 | 9.59E+02 | 2.94E+02 | 9.92E-01 | 6.96E-01 | 7.65E-01 | -0.18 | -2.38 | -2.19 |
| AOA1D3JRB4  | 2 (1)   | 20.0  | 3.12E-04 | 1.67E+02 | 1.40E+02 | 1.51E+02 | 4.48E+02 | 4.80E+02 | 5.61E+02 | 3.07E+02 | 4.02E+02 | 3.10E+02 | 2.48E-04 | 6.21E-03 | 1.46E-02 | 1.70  | 1.16  | -0.55 |
| AOA1D3JRB5  | 10 (4)  | 50.9  | 7.35E-01 | 6.76E+04 | 6.04E+04 | 6.64E+04 | 7.34E+04 | 7.60E+04 | 7.90E+04 | 0.00E+00 | 1.02E+05 | 6.66E+04 | 8.91E-01 | 9.38E-01 | 7.15E-01 | 0.23  | -0.20 | -0.43 |
| AOA1D3JRB8  | 13 (5)  | 91.4  | 4.08E-01 | 2.49E+05 | 2.76E+05 | 2.89E+05 | 2.37E+05 | 2.22E+05 | 3.08E+05 | 2.18E+05 | 3.71E+05 | 3.81E+05 | 9.48E-01 | 5.68E-01 | 4.08E-01 | -0.08 | 0.25  | 0.34  |
| AOA1D3JRC4  | 11 (1)  | 45.8  | NA       | NA    | NA    | NA    |
| AOA1D3JRC8  | 5 (2)   | 27.0  | 1.39E-01 | 6.05E+04 | 6.07E+04 | 6.15E+04 | 7.46E+04 | 6.88E+04 | 1.07E+05 | 6.78E+04 | 1.07E+05 | 1.15E+05 | 3.68E-01 | 1.25E-01 | 6.77E-01 | 0.45  | 0.67  | 0.21  |
| AOA1D3JRD8  | 15 (1)  | 65.9  | 8.07E-03 | 1.47E+04 | 1.71E+04 | 1.14E+04 | 2.08E+04 | 2.39E+04 | 2.31E+04 | 2.05E+04 | 2.61E+04 | 2.39E+04 | 1.68E-02 | 1.04E-02 | 9.01E-01 | 0.65  | 0.71  | 0.06  |
| AOA1D3JRE5  | 3 (2)   | 9.6   | 1.33E-02 | 1.09E+05 | 7.59E+04 | 9.13E+04 | 2.31E+05 | 2.63E+05 | 1.62E+05 | 2.00E+05 | 1.65E+05 | 1.43E+05 | 1.13E-02 | 8.37E-02 | 2.80E-01 | 1.24  | 0.88  | -0.37 |
| AOA1D3JRF7  | 4 (1)   | 24.7  | 2.22E-01 | 1.21E+04 | 1.61E+04 | 1.57E+04 | 1.88E+04 | 1.83E+04 | 2.07E+04 | 1.19E+04 | 2.07E+04 | 1.32E+04 | 2.39E-01 | 9.61E-01 | 3.31E-01 | 0.40  | 0.07  | -0.33 |
| AOA1D3JRI0  | 11 (3)  | 77.3  | 4.08E-03 | 1.02E+05 | 1.20E+05 | 1.21E+05 | 9.48E+04 | 9.50E+04 | 1.09E+05 | 8.06E+04 | 7.49E+04 | 6.60E+04 | 1.93E-01 | 3.50E-03 | 2.82E-02 | -0.20 | -0.63 | -0.43 |
| AOA1D3JRI3  | 2 (0)   | 9.4   | NA       | NA    | NA    | NA    |
| AOA1D3JRI4  | 2 (0)   | 9.4   | NA       | NA    | NA    | NA    |
| AOA1D3JRL0  | 3 (0)   | 23.0  | NA       | NA    | NA    | NA    |
| AOA1D3JRL1  | 6 (5)   | 23.3  | 1.24E-01 | 3.33E+05 | 2.32E+05 | 7.40E+04 | 7.28E+04 | 1.01E+05 | 5.27E+04 | 1.05E+05 | 8.06E+04 | 4.69E+04 | 1.61E-01 | 1.67E-01 | 9.99E-01 | -1.50 | -1.46 | 0.04  |
| AOA1D3JRL2  | 4 (1)   | 45.9  | NA       | NA    | NA    | NA    |
| AOA1D3JRL7  | 15 (5)  | 110.8 | 5.84E-01 | 2.73E+05 | 2.14E+05 | 2.38E+05 | 2.20E+05 | 2.55E+05 | 2.00E+05 | 2.77E+05 | 1.37E+05 | 1.87E+05 | 9.01E-01 | 5.59E-01 | 8.03E-01 | -0.10 | -0.27 | -0.17 |
| AOA1D3JRM3  | 11 (5)  | 61.0  | 1.40E-01 | 8.45E+04 | 1.09E+05 | 1.02E+05 | 1.34E+05 | 1.26E+05 | 1.82E+05 | 9.88E+04 | 1.58E+05 | 1.32E+05 | 1.28E-01 | 3.56E-01 | 7.04E-01 | 0.58  | 0.40  | -0.18 |
| AOA1D3JRM8  | 6 (1)   | 38.3  | 6.74E-02 | 6.57E+03 | 7.40E+03 | 7.01E+03 | 2.04E+04 | 1.58E+04 | 3.10E+04 | 9.99E+03 | 2.63E+04 | 2.56E+04 | 7.93E-02 | 1.17E-01 | 9.51E-01 | 1.68  | 1.56  | -0.12 |
| AOA1D3JRN4  | 54 (16) | 438.4 | 5.26E-05 | 1.96E+06 | 1.72E+06 | 1.77E+06 | 1.60E+06 | 1.64E+06 | 1.65E+06 | 1.08E+06 | 1.02E+06 | 9.58E+05 | 6.98E-02 | 5.33E-05 | 2.47E-04 | -0.16 | -0.83 | -0.68 |
| AOA1D3JRP9  | 2 (1)   | 5.2   | 7.49E-03 | 1.47E+03 | 1.49E+03 | 2.35E+03 | 8.09E+02 | 5.78E+02 | 1.62E+02 | 6.41E+02 | 5.48E+01 | 0.00E+00 | 2.09E-02 | 8.20E-03 | 6.80E-01 | -1.78 | -2.93 | -1.16 |
| AOA1D3JREQ8 | 4 (2)   | 19.7  | 2.11E-03 | 7.20E+04 | 6.74E+04 | 6.70E+04 | 9.63E+04 | 9.68E+04 | 1.03E+05 | 8.78E+04 | 1.08E+05 | 1.04E+05 | 3.97E-03 | 3.20E-03 | 9.70E-01 | 0.52  | 0.54  | 0.02  |
| AOA1D3JRR2  | 6 (0)   | 41.3  | NA       | NA    | NA    | NA    |
| AOA1D3JRS0  | 11 (3)  | 79.6  | 2.60E-01 | 2.48E+04 | 2.00E+04 | 2.20E+04 | 3.05E+04 | 3.18E+04 | 1.91E+04 | 2.67E+04 | 2.92E+04 | 2.98E+04 | 4.20E-01 | 2.60E-01 | 9.15E-01 | 0.28  | 0.36  | 0.08  |
| AOA1D3JRS4  | 16 (6)  | 97.2  | 1.60E-02 | 6.92E+04 | 7.50E+04 | 7.28E+04 | 1.37E+05 | 1.29E+05 | 1.60E+05 | 1.53E+05 | 2.21E+05 | 3.05E+05 | 2.18E-01 | 1.33E-02 | 1.31E-01 | 0.97  | 1.65  | 0.67  |
| AOA1D3JRS8  | 19 (8)  | 149.7 | 2.13E-03 | 6.50E+05 | 5.95E+05 | 6.63E+05 | 8.45E+05 | 8.86E+05 | 8.57E+05 | 6.63E+05 | 7.65E+05 | 7.79E+05 | 1.72E-03 | 7.06E-02 | 2.74E-02 | 0.44  | 0.21  | -0.23 |
| AOA1D3JRT8  | 11 (1)  | 70.2  | 9.80E-02 | 6.26E+03 | 9.55E+03 | 8.45E+03 | 7.09E+03 | 6.29E+03 | 8.11E+03 | 9.02E+03 | 9.47E+03 | 1.12E+04 | 6.74E-01 | 2.71E-01 | 8.96E-02 | -0.17 | 0.29  | 0.47  |
| AOA1D3JRT9  | 4 (2)   | 21.7  | 3.33E-03 | 3.83E+04 | 4.41E+04 | 4.39E+04 | 2.29E+04 | 2.20E+04 | 2.84E+04 | 2.51E+04 | 2.77E+04 | 1.60E+04 | 6.88E-03 | 4.58E-03 | 9.10E-01 | -0.78 | -0.88 | -0.09 |
| AOA1D3JRU4  | 5 (1)   | 29.3  | 5.55E-02 | 1.48E+05 | 1.14E+05 | 1.36E+05 | 1.27E+05 | 1.40E+05 | 1.13E+05 | 1.80E+05 | 1.44E+05 | 1.77E+05 | 8.95E-01 | 1.09E-01 | 6.17E-02 | -0.07 | 0.33  | 0.40  |
| AOA1D3JRU5  | 8 (2)   | 55.6  | 1.16E-02 | 1.37E+05 | 1.39E+05 | 1.50E+05 | 1.96E+05 | 2.11E+05 | 1.75E+05 | 1.32E+05 | 1.38E+05 | 8.13E+04 | 5.44E-02 | 3.82E-01 | 1.04E-02 | 0.45  | -0.28 | -0.73 |
| AOA1D3JRW1  | 13 (7)  | 116.7 | 5.36E-03 | 1.02E+05 | 6.23E+04 | 6.43E+04 | 1.06E+05 | 1.18E+05 | 1.07E+05 | 1.92E+05 | 1.63E+05 | 2.56E+05 | 4.08E-01 | 5.14E-03 | 2.20E-02 | 0.54  | 1.42  | 0.88  |
| AOA1D3JRW6  | 15 (4)  | 116.6 | 3.58E-01 | 2.34E+05 | 1.23E+05 | 2.39E+05 | 1.88E+05 | 2.12E+05 | 1.57E+05 | 2.38E+05 | 1.70E+05 | 1.65E+05 | 3.77E-01 | 4.76E-01 | 9.76E-01 | -0.26 | -0.22 | 0.04  |
| AOA1D3JRW8  | 3 (2)   | 15.1  | 2.74E-02 | 5.02E+04 | 4.25E+04 | 5.07E+04 | 5.76E+04 | 5.87E+04 | 5.41E+04 | 5.43E+04 | 6.27E+04 | 6.29E+04 | 8.32E-02 | 2.66E-02 | 6.42E-01 | 0.25  | 0.33  | 0.08  |

|            |          |       |          |          |          |          |          |          |          |          |          |          |          |          |          |       |       |       |
|------------|----------|-------|----------|----------|----------|----------|----------|----------|----------|----------|----------|----------|----------|----------|----------|-------|-------|-------|
| AOA1D3JRX0 | 4 (2)    | 22.4  | 6.12E-02 | 5.72E+04 | 5.51E+04 | 5.87E+04 | 7.13E+04 | 7.49E+04 | 6.60E+04 | 7.96E+04 | 7.31E+04 | 1.14E+05 | 4.41E-01 | 5.25E-02 | 2.74E-01 | 0.31  | 0.64  | 0.33  |
| AOA1D3JRX2 | 11 (2)   | 60.7  | 5.12E-02 | 8.11E+04 | 6.08E+04 | 6.88E+04 | 9.91E+04 | 1.03E+05 | 9.03E+04 | 9.29E+04 | 7.75E+04 | 6.48E+04 | 4.78E-02 | 6.42E-01 | 1.55E-01 | 0.47  | 0.16  | -0.31 |
| AOA1D3JRX5 | 5 (1)    | 89.7  | NA       | NA    | NA    | NA    |
| AOA1D3JRX9 | 12 (3)   | 79.0  | NA       | NA    | NA    | NA    |
| AOA1D3JRZ9 | 11 (1)   | 75.5  | 3.70E-04 | 3.70E+04 | 2.73E+04 | 3.26E+04 | 5.26E+04 | 5.09E+04 | 5.01E+04 | 5.79E+04 | 5.53E+04 | 5.19E+04 | 1.17E-03 | 4.28E-04 | 4.07E-01 | 0.67  | 0.77  | 0.10  |
| AOA1D3JS01 | 12 (3)   | 63.1  | 3.68E-03 | 2.97E+04 | 3.12E+04 | 3.30E+04 | 4.01E+04 | 3.84E+04 | 3.89E+04 | 4.79E+04 | 4.12E+04 | 5.22E+04 | 6.69E-02 | 2.96E-03 | 6.17E-02 | 0.32  | 0.59  | 0.27  |
| AOA1D3JS08 | 4 (0)    | 20.9  | NA       | NA    | NA    | NA    |
| AOA1D3JS14 | 10 (3)   | 62.6  | 2.20E-03 | 2.21E+05 | 1.69E+05 | 2.16E+05 | 3.36E+05 | 3.71E+05 | 3.09E+05 | 2.51E+05 | 2.04E+05 | 2.11E+05 | 2.63E-03 | 6.81E-01 | 5.87E-03 | 0.75  | 0.14  | -0.61 |
| AOA1D3JS15 | 23 (8)   | 173.3 | 8.78E-04 | 4.87E+05 | 3.99E+05 | 4.73E+05 | 5.83E+05 | 6.23E+05 | 5.54E+05 | 8.32E+05 | 8.04E+05 | 1.00E+06 | 1.31E-01 | 7.89E-04 | 5.57E-03 | 0.37  | 0.96  | 0.59  |
| AOA1D3JS16 | 3 (0)    | 15.9  | NA       | NA    | NA    | NA    |
| AOA1D3JS21 | 3 (0)    | 15.3  | NA       | NA    | NA    | NA    |
| AOA1D3JS27 | 2 (1)    | 10.4  | 5.49E-03 | 2.77E+03 | 3.37E+03 | 2.99E+03 | 2.41E+03 | 3.18E+03 | 2.29E+03 | 1.11E+03 | 1.75E+03 | 6.78E+02 | 5.32E-01 | 5.64E-03 | 1.85E-02 | -0.21 | -1.37 | -1.16 |
| AOA1D3JS30 | 26 (10)  | 174.6 | 5.96E-02 | 1.13E+05 | 1.25E+05 | 1.16E+05 | 2.22E+05 | 2.22E+05 | 3.76E+05 | 1.38E+05 | 2.50E+05 | 2.38E+05 | 5.15E-02 | 2.55E-01 | 4.60E-01 | 1.21  | 0.82  | -0.39 |
| AOA1D3JS31 | 9 (0)    | 59.8  | NA       | NA    | NA    | NA    |
| AOA1D3JS34 | 5 (0)    | 41.7  | NA       | NA    | NA    | NA    |
| AOA1D3JS35 | 2 (1)    | 11.5  | 7.42E-01 | 2.41E+04 | 2.20E+04 | 2.60E+04 | 2.14E+04 | 2.17E+04 | 2.06E+04 | 3.04E+04 | 2.15E+04 | 1.63E+04 | 7.21E-01 | 9.32E-01 | 9.04E-01 | -0.18 | -0.08 | 0.10  |
| AOA1D3JS37 | 5 (2)    | 49.5  | 2.05E-01 | 6.06E+05 | 4.53E+05 | 5.34E+05 | 4.26E+05 | 4.63E+05 | 3.44E+05 | 6.14E+05 | 4.59E+05 | 4.59E+05 | 2.16E-01 | 9.45E-01 | 3.21E-01 | -0.37 | -0.06 | 0.31  |
| AOA1D3JS38 | 4 (0)    | 22.9  | NA       | NA    | NA    | NA    |
| AOA1D3JS41 | 16 (4)   | 97.2  | 5.19E-02 | 8.37E+04 | 8.72E+04 | 8.51E+04 | 8.25E+04 | 9.07E+04 | 9.33E+04 | 7.67E+04 | 8.19E+04 | 6.77E+04 | 7.13E-01 | 1.39E-01 | 5.03E-02 | 0.06  | -0.18 | -0.24 |
| AOA1D3JS51 | 3 (1)    | 15.4  | 4.76E-03 | 6.40E+03 | 4.76E+03 | 7.42E+03 | 2.13E+03 | 1.61E+03 | 1.60E+03 | 3.13E+03 | 3.77E+02 | 4.02E+02 | 1.02E-02 | 6.24E-03 | 8.83E-01 | -1.80 | -2.25 | -0.45 |
| AOA1D3JS52 | 12 (3)   | 83.9  | 3.90E-04 | 5.66E+04 | 5.58E+04 | 6.46E+04 | 7.89E+04 | 8.09E+04 | 7.75E+04 | 4.28E+04 | 5.34E+04 | 5.01E+04 | 3.08E-03 | 6.27E-02 | 3.40E-04 | 0.42  | -0.27 | -0.70 |
| AOA1D3JS54 | 7 (2)    | 49.8  | 1.28E-03 | 1.39E+04 | 1.69E+04 | 1.27E+04 | 4.95E+03 | 4.45E+03 | 5.21E+03 | 5.36E+03 | 9.30E+03 | 5.74E+03 | 1.38E-03 | 4.39E-03 | 4.31E-01 | -1.57 | -1.09 | 0.48  |
| AOA1D3JS77 | 2 (1)    | 11.1  | 7.42E-02 | 1.43E+03 | 1.37E+03 | 1.35E+03 | 2.74E+03 | 2.83E+03 | 1.49E+03 | 2.71E+03 | 4.05E+03 | 2.24E+03 | 2.75E-01 | 6.49E-02 | 5.26E-01 | 0.77  | 1.12  | 0.35  |
| AOA1D3JS79 | 5 (1)    | 56.8  | NA       | NA    | NA    | NA    |
| AOA1D3JSA4 | 2 (0)    | 10.0  | NA       | NA    | NA    | NA    |
| AOA1D3JSA5 | 20 (10)  | 171.4 | 2.70E-02 | 3.89E+05 | 3.22E+05 | 3.84E+05 | 5.65E+05 | 5.59E+05 | 5.29E+05 | 5.87E+05 | 5.12E+05 | 3.89E+05 | 2.51E-02 | 9.47E-02 | 5.57E-01 | 0.59  | 0.44  | -0.15 |
| AOA1D3JSB3 | 3 (0)    | 14.4  | NA       | NA    | NA    | NA    |
| AOA1D3JSC3 | 12 (7)   | 109.9 | 1.11E-03 | 1.44E+05 | 1.53E+05 | 1.41E+05 | 2.21E+05 | 2.36E+05 | 2.66E+05 | 3.64E+05 | 3.57E+05 | 4.86E+05 | 8.50E-02 | 9.34E-04 | 9.89E-03 | 0.72  | 1.46  | 0.74  |
| AOA1D3JSC7 | 4 (1)    | 45.8  | NA       | NA    | NA    | NA    |
| AOA1D3JSD1 | 10 (2)   | 68.9  | 4.35E-01 | 6.27E+04 | 5.35E+04 | 5.72E+04 | 6.59E+04 | 6.38E+04 | 6.07E+04 | 5.36E+04 | 6.72E+04 | 6.44E+04 | 4.22E-01 | 6.34E-01 | 9.16E-01 | 0.14  | 0.10  | -0.04 |
| AOA1D3JSD2 | 16 (7)   | 155.8 | 4.88E-02 | 3.39E+05 | 3.37E+05 | 3.74E+05 | 5.23E+05 | 4.93E+05 | 5.27E+05 | 3.85E+05 | 5.53E+05 | 6.29E+05 | 7.65E-02 | 6.49E-02 | 9.91E-01 | 0.55  | 0.58  | 0.02  |
| AOA1D3JSD5 | 7 (3)    | 44.1  | 5.07E-01 | 3.21E+05 | 2.38E+05 | 2.56E+05 | 2.29E+05 | 2.53E+05 | 2.09E+05 | 3.47E+05 | 2.40E+05 | 2.28E+05 | 5.63E-01 | 1.00E+00 | 5.68E-01 | -0.24 | 0.00  | 0.24  |
| AOA1D3JSE9 | 4 (0)    | 21.6  | NA       | NA    | NA    | NA    |
| AOA1D3JSF1 | 23 (10)  | 175.2 | 3.61E-01 | 3.68E+05 | 4.32E+05 | 3.10E+05 | 4.39E+05 | 4.15E+05 | 4.51E+05 | 5.08E+05 | 4.38E+05 | 3.53E+05 | 4.12E-01 | 4.32E-01 | 9.99E-01 | 0.23  | 0.23  | -0.01 |
| AOA1D3JSF6 | 2 (0)    | 10.8  | NA       | NA    | NA    | NA    |
| AOA1D3JSF8 | 123 (11) | 543.7 | NA       | NA    | NA    | NA    |
| AOA1D3JSG1 | 4 (1)    | 22.4  | 1.43E-02 | 8.78E+03 | 1.18E+04 | 7.50E+03 | 3.56E+03 | 2.73E+03 | 5.90E+03 | 4.48E+03 | 4.98E+03 | 2.67E+03 | 2.24E-02 | 2.20E-02 | 1.00E+00 | -1.20 | -1.21 | -0.01 |
| AOA1D3JSG8 | 3 (0)    | 18.6  | NA       | NA    | NA    | NA    |
| AOA1D3JSG9 | 5 (1)    | 25.6  | 5.06E-02 | 4.92E+04 | 4.05E+04 | 5.07E+04 | 7.30E+04 | 7.95E+04 | 5.98E+04 | 7.08E+04 | 4.87E+04 | 5.85E+04 | 4.28E-02 | 2.90E-01 | 3.46E-01 | 0.60  | 0.34  | -0.25 |
| AOA1D3JSH2 | 7 (2)    | 30.8  | 1.20E-02 | 7.62E+04 | 7.58E+04 | 8.47E+04 | 5.09E+04 | 4.85E+04 | 5.66E+04 | 5.86E+04 | 6.59E+04 | 4.22E+04 | 1.44E-02 | 2.66E-02 | 8.55E-01 | -0.60 | -0.51 | 0.09  |
| AOA1D3JSJ1 | 31 (4)   | 123.7 | NA       | NA    | NA    | NA    |
| AOA1D3JSJ6 | 8 (1)    | 56.8  | NA       | NA    | NA    | NA    |
| AOA1D3JSK7 | 9 (4)    | 59.4  | 2.29E-01 | 3.31E+04 | 4.90E+04 | 3.70E+04 | 3.27E+04 | 3.54E+04 | 5.47E+04 | 2.61E+04 | 3.31E+04 | 2.57E+04 | 9.84E-01 | 3.17E-01 | 2.57E-01 | 0.04  | -0.49 | -0.53 |
| AOA1D3JSM2 | 3 (1)    | 15.5  | 1.03E-01 | 8.51E+03 | 5.57E+03 | 7.87E+03 | 6.42E+03 | 5.53E+03 | 5.48E+03 | 5.66E+03 | 5.35E+03 | 5.14E+03 | 2.09E-01 | 1.04E-01 | 8.52E-01 | -0.33 | -0.44 | -0.11 |
| AOA1D3JSM7 | 16 (4)   | 96.8  | 3.33E-01 | 1.86E+05 | 1.85E+05 | 1.99E+05 | 1.74E+05 | 1.79E+05 | 1.65E+05 | 2.08E+05 | 1.85E+05 | 1.66E+05 | 3.34E-01 | 9.34E-01 | 4.95E-01 | -0.14 | -0.03 | 0.11  |
| AOA1D3JSM9 | 3 (0)    | 16.3  | NA       | NA    | NA    | NA    |
| AOA1D3JSP6 | 28 (8)   | 206.4 | 5.61E-03 | 9.70E+05 | 1.19E+06 | 8.65E+05 | 7.58E+05 | 7.92E+05 | 7.36E+05 | 5.21E+05 | 5.87E+05 | 6.08E+05 | 5.61E-02 | 4.60E-03 | 1.35E-01 | -0.41 | -0.82 | -0.41 |
| AOA1D3JSP7 | 8 (2)    | 67.9  | 1.19E-01 | 1.79E+04 | 1.16E+04 | 3.15E+04 | 1.09E+04 | 1.14E+04 | 8.49E+03 | 1.30E+04 | 5.13E+03 | 6.56E+03 | 2.10E-01 | 1.28E-01 | 9.21E-01 | -0.99 | -1.31 | -0.32 |
| AOA1D3JSR6 | 2 (1)    | 9.9   | 2.16E-01 | 2.60E+03 | 5.41E+03 | 3.44E+03 | 3.61E+03 | 2.90E+03 | 6.80E+03 | 3.19E+01 | 2.37E+03 | 2.91E+03 | 9.00E-01 | 3.68E-01 | 2.16E-01 | 0.22  | -1.11 | -1.32 |
| AOA1D3JSR8 | 18 (6)   | 113.2 | 1.36E-02 | 2.38E+05 | 2.07E+05 | 2.36E+05 | 2.85E+05 | 2.85E+05 | 2.64E+05 | 2.37E+05 | 1.86E+05 | 2.17E+05 | 3.93E-02 | 6.67E-01 | 1.41E-02 | 0.29  | -0.09 | -0.39 |
| AOA1D3JSR9 | 14 (4)   | 86.8  | 6.26E-01 | 4.00E+04 | 4.74E+04 | 3.52E+04 | 3.83E+04 | 4.59E+04 | 6.14E+04 | 3.63E+04 | 4.28E+04 | 5.43E+04 | 6.00E-01 | 8.88E-01 | 8.57E-01 | 0.25  | 0.12  | -0.13 |
| AOA1D3JSV2 | 12 (3)   | 90.6  | 8.75E-02 | 5.07E+04 | 5.87E+04 | 5.66E+04 | 4.82E+04 | 4.89E+04 | 5.14E+04 | 5.26E+04 | 3.99E+04 | 3.73E+04 | 4.34E-01 | 7.52E-02 | 3.91E-01 | -0.16 | -0.36 | -0.19 |

|            |         |       |          |          |          |          |          |          |          |          |          |          |          |          |          |       |       |       |
|------------|---------|-------|----------|----------|----------|----------|----------|----------|----------|----------|----------|----------|----------|----------|----------|-------|-------|-------|
| AOA1D3JSV4 | 8 (2)   | 38.1  | 3.21E-02 | 1.42E+04 | 1.02E+04 | 1.37E+04 | 1.72E+04 | 2.15E+04 | 1.41E+04 | 2.68E+04 | 1.84E+04 | 2.35E+04 | 2.70E-01 | 2.68E-02 | 2.31E-01 | 0.47  | 0.85  | 0.38  |
| AOA1D3JSV7 | 16 (5)  | 113.4 | 3.33E-01 | 1.10E+05 | 1.13E+05 | 1.19E+05 | 9.74E+04 | 9.24E+04 | 1.29E+05 | 7.58E+04 | 1.05E+05 | 1.02E+05 | 8.17E-01 | 3.10E-01 | 6.04E-01 | -0.10 | -0.28 | -0.18 |
| AOA1D3JSW3 | 3 (1)   | 22.0  | 2.89E-01 | 2.42E+03 | 1.02E+04 | 2.76E+03 | 5.02E+03 | 6.98E+03 | 2.27E+04 | 0.00E+00 | 5.56E+03 | 2.78E+03 | 4.76E-01 | 8.94E-01 | 2.83E-01 | 1.17  | -0.89 | -2.06 |
| AOA1D3JSW4 | 2 (1)   | 10.3  | 1.94E-01 | 4.72E+03 | 3.75E+03 | 3.94E+03 | 3.90E+03 | 3.41E+03 | 3.32E+03 | 3.81E+03 | 4.20E+03 | 4.83E+03 | 3.21E-01 | 9.23E-01 | 2.00E-01 | -0.22 | 0.05  | 0.27  |
| AOA1D3JSW6 | 27 (8)  | 250.3 | 9.97E-04 | 6.87E+05 | 5.54E+05 | 6.27E+05 | 1.12E+06 | 1.20E+06 | 1.08E+06 | 7.29E+05 | 7.84E+05 | 9.59E+05 | 8.24E-04 | 6.31E-02 | 1.06E-02 | 0.86  | 0.40  | -0.46 |
| AOA1D3JSX5 | 7 (2)   | 56.0  | 4.89E-02 | 6.73E+04 | 7.96E+04 | 7.70E+04 | 1.41E+05 | 1.21E+05 | 2.02E+05 | 1.17E+05 | 2.19E+05 | 2.42E+05 | 1.61E-01 | 4.47E-02 | 5.95E-01 | 1.05  | 1.37  | 0.32  |
| AOA1D3JSX6 | 15 (3)  | 82.9  | 3.27E-01 | 2.83E+04 | 1.30E+04 | 2.31E+04 | 2.49E+04 | 3.45E+04 | 2.40E+04 | 3.24E+04 | 2.22E+04 | 4.16E+04 | 6.17E-01 | 3.03E-01 | 7.94E-01 | 0.37  | 0.58  | 0.21  |
| AOA1D3JSY3 | 12 (3)  | 102.2 | 1.96E-01 | 5.98E+04 | 4.16E+04 | 6.24E+04 | 2.82E+04 | 3.79E+04 | 2.88E+04 | 6.12E+04 | 2.18E+04 | 4.50E+04 | 1.75E-01 | 5.59E-01 | 6.05E-01 | -0.79 | -0.36 | 0.43  |
| AOA1D3JSY5 | 28 (1)  | 101.6 | 8.70E-01 | 1.45E+04 | 1.15E+04 | 1.15E+04 | 1.93E+04 | 2.16E+04 | 1.79E+04 | 0.00E+00 | 6.36E+04 | 0.00E+00 | 9.13E-01 | 8.73E-01 | 9.95E-01 | 0.65  | 0.76  | 0.11  |
| AOA1D3JSZ2 | 3 (2)   | 15.7  | 5.19E-01 | 1.25E+04 | 1.68E+04 | 1.54E+04 | 1.65E+04 | 1.47E+04 | 2.52E+04 | 9.40E+03 | 1.96E+04 | 1.57E+04 | 5.78E-01 | 1.00E+00 | 5.74E-01 | 0.34  | 0.00  | -0.34 |
| AOA1D3JSZ5 | 2 (0)   | 13.0  | NA       | NA    | NA    | NA    |
| AOA1D3JSZ7 | 2 (0)   | 13.4  | NA       | NA    | NA    | NA    |
| AOA1D3JT01 | 3 (1)   | 17.0  | 3.77E-01 | 2.06E+03 | 6.55E+03 | 1.72E+03 | 6.03E+03 | 3.77E+03 | 1.72E+04 | 2.36E+02 | 3.50E+03 | 7.99E+03 | 4.13E-01 | 9.93E-01 | 4.68E-01 | 1.38  | 0.18  | -1.20 |
| AOA1D3JT07 | 5 (1)   | 28.5  | 1.29E-03 | 8.86E+03 | 6.80E+03 | 9.37E+03 | 4.23E+03 | 4.20E+03 | 4.57E+03 | 9.78E+03 | 8.33E+03 | 9.37E+03 | 3.85E-03 | 5.44E-01 | 1.47E-03 | -0.95 | 0.13  | 1.08  |
| AOA1D3JT12 | 14 (6)  | 96.8  | 6.92E-02 | 1.66E+05 | 1.64E+05 | 2.38E+05 | 1.22E+05 | 1.25E+05 | 1.19E+05 | 1.63E+05 | 1.25E+05 | 9.63E+04 | 8.36E-02 | 1.15E-01 | 9.66E-01 | -0.63 | -0.56 | 0.07  |
| AOA1D3JT19 | 8 (1)   | 48.1  | 6.41E-01 | 1.81E+03 | 1.00E+04 | 3.25E+03 | 2.73E+03 | 1.77E+03 | 1.41E+04 | 1.44E+02 | 3.34E+03 | 3.78E+03 | 9.53E-01 | 7.94E-01 | 6.28E-01 | 0.30  | -1.05 | -1.35 |
| AOA1D3JT24 | 3 (0)   | 14.9  | NA       | NA    | NA    | NA    |
| AOA1D3JT28 | 16 (2)  | 88.6  | 7.27E-01 | 7.72E+04 | 6.38E+04 | 8.34E+04 | 7.03E+04 | 7.41E+04 | 6.68E+04 | 8.58E+04 | 6.87E+04 | 7.16E+04 | 7.90E-01 | 9.97E-01 | 7.46E-01 | -0.09 | 0.01  | 0.10  |
| AOA1D3JT33 | 5 (2)   | 44.8  | 2.39E-02 | 8.15E+04 | 6.53E+04 | 7.27E+04 | 7.24E+04 | 8.36E+04 | 6.58E+04 | 5.87E+04 | 3.19E+04 | 4.48E+04 | 9.96E-01 | 3.82E-02 | 3.43E-02 | 0.02  | -0.70 | -0.71 |
| AOA1D3JT34 | 10 (6)  | 60.4  | 3.83E-01 | 9.34E+04 | 1.15E+05 | 1.01E+05 | 8.17E+04 | 8.76E+04 | 1.13E+05 | 9.65E+04 | 8.83E+04 | 7.82E+04 | 6.69E-01 | 3.57E-01 | 8.19E-01 | -0.13 | -0.23 | -0.10 |
| AOA1D3JT35 | 10 (5)  | 74.4  | 4.13E-01 | 3.16E+05 | 2.38E+05 | 2.68E+05 | 2.93E+05 | 3.14E+05 | 2.44E+05 | 3.29E+05 | 2.89E+05 | 3.15E+05 | 9.29E-01 | 4.05E-01 | 5.94E-01 | 0.05  | 0.18  | 0.13  |
| AOA1D3JT43 | 16 (7)  | 113.0 | 4.33E-03 | 3.54E+05 | 3.68E+05 | 3.31E+05 | 2.89E+05 | 2.71E+05 | 2.48E+05 | 2.88E+05 | 2.79E+05 | 2.46E+05 | 6.71E-03 | 7.56E-03 | 9.92E-01 | -0.38 | -0.37 | 0.01  |
| AOA1D3JT44 | 6 (0)   | 25.9  | NA       | NA    | NA    | NA    |
| AOA1D3JT50 | 2 (0)   | 10.3  | NA       | NA    | NA    | NA    |
| AOA1D3JT61 | 16 (6)  | 102.4 | 9.56E-01 | 3.88E+05 | 3.50E+05 | 4.53E+05 | 1.73E+05 | 3.37E+04 | 1.00E+06 | 5.42E+05 | 4.60E+05 | 3.93E+05 | 1.00E+00 | 9.60E-01 | 9.67E-01 | 0.02  | 0.23  | 0.21  |
| AOA1D3JT64 | 6 (1)   | 44.0  | 2.24E-03 | 8.35E+03 | 6.06E+03 | 5.82E+03 | 2.61E+04 | 2.81E+04 | 2.12E+04 | 1.98E+04 | 2.90E+04 | 3.23E+04 | 4.96E-03 | 2.99E-03 | 8.52E-01 | 1.90  | 2.00  | 0.11  |
| AOA1D3JT65 | 25 (10) | 225.5 | 3.26E-03 | 1.90E+06 | 1.46E+06 | 1.75E+06 | 1.04E+06 | 1.08E+06 | 8.49E+05 | 1.22E+06 | 1.22E+06 | 1.29E+06 | 2.82E-03 | 2.23E-02 | 1.84E-01 | -0.78 | -0.46 | 0.33  |
| AOA1D3JT69 | 4 (3)   | 23.2  | 1.23E-01 | 3.16E+04 | 2.73E+04 | 2.84E+04 | 1.98E+04 | 1.97E+04 | 2.07E+04 | 2.95E+04 | 1.91E+04 | 1.27E+04 | 1.54E-01 | 1.73E-01 | 9.95E-01 | -0.54 | -0.51 | 0.03  |
| AOA1D3JT71 | 28 (8)  | 173.8 | 1.43E-01 | 1.31E+05 | 1.32E+05 | 1.18E+05 | 1.42E+05 | 1.58E+05 | 1.77E+05 | 1.24E+05 | 1.67E+05 | 1.38E+05 | 1.25E-01 | 5.09E-01 | 5.14E-01 | 0.32  | 0.17  | -0.15 |
| AOA1D3JT78 | 14 (5)  | 74.4  | 4.56E-01 | 1.72E+05 | 1.43E+05 | 1.86E+05 | 1.77E+05 | 1.89E+05 | 1.82E+05 | 1.88E+05 | 1.60E+05 | 1.56E+05 | 4.97E-01 | 9.97E-01 | 5.38E-01 | 0.13  | 0.01  | -0.12 |
| AOA1D3JT86 | 2 (0)   | 11.7  | NA       | NA    | NA    | NA    |
| AOA1D3JT88 | 12 (2)  | 82.6  | 1.23E-03 | 9.13E+05 | 7.63E+05 | 9.34E+05 | 1.69E+06 | 1.80E+06 | 1.58E+06 | 2.14E+06 | 2.42E+06 | 3.08E+06 | 3.18E-02 | 9.81E-04 | 2.57E-02 | 0.96  | 1.55  | 0.59  |
| AOA1D3JT92 | 31 (12) | 247.7 | 1.48E-05 | 1.70E+06 | 1.54E+06 | 1.65E+06 | 3.85E+06 | 4.22E+06 | 4.22E+06 | 2.18E+06 | 2.61E+06 | 2.64E+06 | 1.23E-05 | 4.74E-03 | 1.45E-04 | 1.33  | 0.60  | -0.73 |
| AOA1D3JTA1 | 2 (0)   | 89.7  | NA       | NA    | NA    | NA    |
| AOA1D3JTA7 | 21 (4)  | 121.5 | 3.52E-03 | 3.60E+04 | 3.50E+04 | 5.94E+04 | 7.88E+04 | 8.05E+04 | 7.77E+04 | 7.34E+04 | 7.27E+04 | 7.16E+04 | 3.91E-03 | 1.03E-02 | 6.13E-01 | 0.85  | 0.79  | -0.06 |
| AOA1D3JTC1 | 2 (0)   | 11.5  | NA       | NA    | NA    | NA    |
| AOA1D3JTE0 | 13 (5)  | 86.3  | 6.95E-04 | 2.13E+05 | 1.86E+05 | 2.10E+05 | 2.72E+05 | 2.86E+05 | 2.41E+05 | 3.15E+05 | 3.46E+05 | 3.65E+05 | 2.70E-02 | 5.54E-04 | 1.25E-02 | 0.39  | 0.75  | 0.36  |
| AOA1D3JTE5 | 15 (5)  | 82.5  | 8.96E-01 | 2.89E+05 | 2.30E+05 | 2.58E+05 | 2.69E+05 | 3.04E+05 | 2.03E+05 | 3.54E+05 | 2.26E+05 | 2.48E+05 | 1.00E+00 | 9.13E-01 | 9.13E-01 | 0.00  | 0.09  | 0.09  |
| AOA1D3JTF4 | 23 (10) | 149.5 | 7.55E-01 | 7.01E+05 | 5.95E+05 | 6.68E+05 | 7.10E+05 | 8.15E+05 | 6.17E+05 | 8.17E+05 | 6.32E+05 | 5.13E+05 | 7.94E-01 | 1.00E+00 | 7.88E-01 | 0.13  | 0.00  | -0.13 |
| AOA1D3JTF9 | 4 (1)   | 54.7  | NA       | NA    | NA    | NA    |
| AOA1D3JTG6 | 4 (2)   | 21.6  | 7.62E-01 | 2.02E+04 | 1.36E+04 | 2.14E+04 | 1.86E+04 | 2.04E+04 | 2.00E+04 | 1.28E+04 | 2.05E+04 | 1.94E+04 | 8.94E-01 | 9.54E-01 | 7.46E-01 | 0.10  | -0.07 | -0.16 |
| AOA1D3JTI3 | 2 (0)   | 9.4   | NA       | NA    | NA    | NA    |
| AOA1D3JTI5 | 5 (1)   | 24.7  | 3.09E-03 | 4.37E+03 | 4.71E+03 | 4.78E+03 | 8.34E+03 | 7.65E+03 | 1.13E+04 | 9.35E+03 | 9.92E+03 | 1.05E+04 | 8.30E-03 | 3.61E-03 | 6.85E-01 | 0.98  | 0.89  | -0.09 |
| AOA1D3JTK4 | 2 (1)   | 10.0  | 3.84E-02 | 9.18E+04 | 8.07E+04 | 1.00E+05 | 7.27E+04 | 7.67E+04 | 6.83E+04 | 7.88E+04 | 5.41E+04 | 5.21E+04 | 1.63E-01 | 3.36E-02 | 4.62E-01 | -0.33 | -0.56 | -0.23 |
| AOA1D3JTK8 | 14 (7)  | 107.6 | 8.86E-03 | 2.36E+05 | 2.58E+05 | 2.51E+05 | 2.36E+05 | 2.34E+05 | 2.68E+05 | 3.55E+05 | 4.19E+05 | 5.42E+05 | 9.99E-01 | 1.45E-02 | 1.38E-02 | -0.01 | 0.82  | 0.83  |
| AOA1D3JTL2 | 12 (4)  | 87.1  | 4.43E-01 | 9.60E+04 | 6.44E+04 | 7.12E+04 | 6.18E+04 | 7.09E+04 | 4.94E+04 | 8.57E+04 | 5.00E+04 | 4.94E+04 | 4.85E-01 | 5.24E-01 | 9.97E-01 | -0.35 | -0.32 | 0.02  |
| AOA1D3JTM0 | 2 (0)   | 9.2   | NA       | NA    | NA    | NA    |
| AOA1D3JTP0 | 5 (1)   | 26.8  | 4.49E-01 | 0.00E+00 | 4.56E+01 | 0.00E+00 | 0.00E+00 | 0.00E+00 | 0.00E+00 | 5.55E+02 | 0.00E+00 | 0.00E+00 | 9.94E-01 | 5.37E-01 | 4.85E-01 | 0.00  | 3.61  | 0.00  |
| AOA1D3JTP5 | 9 (2)   | 51.8  | 4.98E-01 | 3.94E+04 | 4.49E+04 | 4.39E+04 | 2.99E+04 | 2.92E+04 | 4.25E+04 | 2.21E+04 | 4.20E+04 | 4.64E+04 | 4.80E-01 | 7.05E-01 | 9.13E-01 | -0.33 | -0.21 | 0.12  |
| AOA1D3JTR0 | 5 (0)   | 24.0  | NA       | NA    | NA    | NA    |
| AOA1D3JTS7 | 4 (0)   | 24.6  | NA       | NA    | NA    | NA    |
| AOA1D3JTT2 | 4 (0)   | 20.3  | NA       | NA    | NA    | NA    |

|            |         |       |          |          |          |          |          |          |          |          |          |          |          |          |          |       |       |       |
|------------|---------|-------|----------|----------|----------|----------|----------|----------|----------|----------|----------|----------|----------|----------|----------|-------|-------|-------|
| AOA1D3JTT4 | 5 (1)   | 32.8  | 4.00E-01 | 8.32E+03 | 1.28E+04 | 1.22E+04 | 1.37E+04 | 1.15E+04 | 1.42E+04 | 4.26E+03 | 1.05E+04 | 1.34E+04 | 7.20E-01 | 7.90E-01 | 3.72E-01 | 0.24  | -0.24 | -0.49 |
| AOA1D3JTT6 | 2 (0)   | 11.1  | NA       | NA    | NA    | NA    |
| AOA1D3JTU6 | 5 (1)   | 23.3  | 9.67E-02 | 1.98E+04 | 1.30E+04 | 1.51E+04 | 1.90E+04 | 2.05E+04 | 1.15E+04 | 2.82E+04 | 3.49E+04 | 1.88E+04 | 9.74E-01 | 1.15E-01 | 1.52E-01 | 0.09  | 0.77  | 0.68  |
| AOA1D3JTU9 | 12 (1)  | 56.8  | NA       | NA    | NA    | NA    |
| AOA1D3JTV5 | 3 (2)   | 7.9   | 7.21E-02 | 1.55E+05 | 1.14E+05 | 1.48E+05 | 1.88E+05 | 2.10E+05 | 1.63E+05 | 1.71E+05 | 1.38E+05 | 1.47E+05 | 6.92E-02 | 7.34E-01 | 1.84E-01 | 0.43  | 0.13  | -0.30 |
| AOA1D3JTV9 | 5 (1)   | 19.9  | 6.60E-01 | 2.50E+05 | 2.02E+05 | 2.44E+05 | 2.60E+05 | 2.88E+05 | 1.92E+05 | 2.80E+05 | 2.50E+05 | 2.45E+05 | 8.63E-01 | 6.36E-01 | 9.10E-01 | 0.09  | 0.15  | 0.07  |
| AOA1D3JTW0 | 18 (5)  | 106.1 | 2.04E-01 | 1.20E+05 | 1.01E+05 | 1.06E+05 | 8.77E+04 | 8.80E+04 | 1.00E+05 | 7.17E+04 | 1.06E+05 | 9.33E+04 | 2.83E-01 | 2.35E-01 | 9.88E-01 | -0.25 | -0.27 | -0.02 |
| AOA1D3JTW1 | 2 (0)   | 8.6   | NA       | NA    | NA    | NA    |
| AOA1D3JTX7 | 3 (0)   | 14.6  | NA       | NA    | NA    | NA    |
| AOA1D3JTY1 | 3 (0)   | 20.0  | NA       | NA    | NA    | NA    |
| AOA1D3JTY9 | 2 (0)   | 14.5  | NA       | NA    | NA    | NA    |
| AOA1D3JTZ0 | 5 (0)   | 24.4  | NA       | NA    | NA    | NA    |
| AOA1D3JTZ7 | 2 (0)   | 4.9   | NA       | NA    | NA    | NA    |
| AOA1D3JTZ9 | 6 (1)   | 41.6  | 7.04E-01 | 1.86E+03 | 4.55E+03 | 2.59E+03 | 1.80E+03 | 1.55E+03 | 4.48E+03 | 1.06E+03 | 2.47E+03 | 2.66E+03 | 9.33E-01 | 6.84E-01 | 8.74E-01 | -0.20 | -0.54 | -0.34 |
| AOA1D3JU04 | 5 (1)   | 41.2  | 7.87E-02 | 1.71E+05 | 1.20E+05 | 1.35E+05 | 1.56E+05 | 1.71E+05 | 1.22E+05 | 2.10E+05 | 1.67E+05 | 2.11E+05 | 9.27E-01 | 8.83E-02 | 1.42E-01 | 0.08  | 0.47  | 0.39  |
| AOA1D3JU12 | 6 (3)   | 31.6  | 2.45E-01 | 4.66E+03 | 1.27E+04 | 5.96E+03 | 1.14E+04 | 1.35E+04 | 3.50E+04 | 2.51E+03 | 1.19E+04 | 1.34E+04 | 2.68E-01 | 9.75E-01 | 3.46E-01 | 1.37  | 0.26  | -1.11 |
| AOA1D3JU16 | 2 (0)   | 10.5  | NA       | NA    | NA    | NA    |
| AOA1D3JU17 | 17 (2)  | 119.6 | 9.01E-03 | 3.07E+05 | 2.77E+05 | 3.56E+05 | 2.48E+05 | 2.49E+05 | 2.61E+05 | 2.23E+05 | 2.27E+05 | 1.96E+05 | 5.93E-02 | 7.67E-03 | 2.47E-01 | -0.31 | -0.54 | -0.23 |
| AOA1D3JU31 | 7 (5)   | 38.7  | 8.55E-03 | 7.21E+05 | 5.84E+05 | 6.62E+05 | 1.23E+06 | 1.37E+06 | 9.38E+05 | 1.09E+06 | 1.01E+06 | 9.91E+05 | 8.02E-03 | 3.54E-02 | 4.28E-01 | 0.85  | 0.65  | -0.20 |
| AOA1D3JU39 | 9 (2)   | 59.7  | 1.41E-02 | 3.70E+05 | 2.96E+05 | 3.68E+05 | 2.29E+05 | 2.42E+05 | 2.03E+05 | 3.28E+05 | 2.79E+05 | 2.58E+05 | 1.16E-02 | 1.81E-01 | 1.33E-01 | -0.62 | -0.26 | 0.36  |
| AOA1D3JU43 | 7 (3)   | 53.9  | 1.56E-01 | 4.26E+04 | 4.08E+04 | 3.25E+04 | 2.44E+04 | 3.46E+04 | 2.32E+04 | 3.72E+04 | 2.16E+04 | 1.67E+04 | 2.59E-01 | 1.66E-01 | 9.33E-01 | -0.49 | -0.62 | -0.12 |
| AOA1D3JU50 | 8 (2)   | 54.2  | 1.58E-02 | 6.96E+04 | 6.04E+04 | 7.37E+04 | 8.87E+04 | 8.88E+04 | 9.69E+04 | 1.07E+05 | 8.69E+04 | 8.64E+04 | 2.89E-02 | 2.11E-02 | 9.61E-01 | 0.43  | 0.46  | 0.03  |
| AOA1D3JU53 | 6 (2)   | 33.4  | 2.19E-01 | 3.76E+04 | 2.88E+04 | 4.81E+04 | 2.24E+04 | 2.54E+04 | 1.58E+04 | 5.29E+04 | 2.21E+04 | 3.05E+04 | 2.30E-01 | 9.44E-01 | 3.41E-01 | -0.85 | -0.12 | 0.73  |
| AOA1D3JU60 | 2 (1)   | 34.7  | NA       | NA    | NA    | NA    |
| AOA1D3JU80 | 26 (3)  | 182.3 | 3.65E-01 | 2.24E+04 | 3.03E+04 | 1.63E+04 | 2.11E+04 | 2.97E+04 | 6.39E+04 | 1.20E+04 | 3.17E+04 | 1.99E+04 | 4.65E-01 | 9.88E-01 | 3.94E-01 | 0.73  | -0.12 | -0.85 |
| AOA1D3JU98 | 38 (9)  | 139.9 | 9.02E-02 | 3.15E+06 | 2.42E+06 | 3.01E+06 | 3.64E+06 | 3.92E+06 | 3.22E+06 | 6.62E+06 | 3.13E+06 | 6.33E+06 | 7.30E-01 | 8.52E-02 | 2.28E-01 | 0.33  | 0.91  | 0.58  |
| AOA1D3JUA2 | 4 (1)   | 21.7  | 1.47E-01 | 3.20E+03 | 1.95E+03 | 1.52E+03 | 2.14E+03 | 1.77E+03 | 2.27E+03 | 2.69E+03 | 2.96E+03 | 4.28E+03 | 9.58E-01 | 2.31E-01 | 1.63E-01 | -0.11 | 0.58  | 0.69  |
| AOA1D3JUB3 | 35 (10) | 227.6 | 1.62E-01 | 4.73E+05 | 4.26E+05 | 4.66E+05 | 3.53E+05 | 3.66E+05 | 3.56E+05 | 5.09E+05 | 3.61E+05 | 3.53E+05 | 1.43E-01 | 5.50E-01 | 5.27E-01 | -0.34 | -0.16 | 0.19  |
| AOA1D3JUB5 | 12 (3)  | 81.7  | 7.61E-01 | 1.50E+05 | 1.37E+05 | 1.51E+05 | 1.38E+05 | 1.35E+05 | 1.23E+05 | 1.78E+05 | 1.29E+05 | 8.72E+04 | 8.05E-01 | 7.89E-01 | 9.99E-01 | -0.15 | -0.15 | -0.01 |
| AOA1D3JUB6 | 12 (4)  | 62.5  | 2.40E-01 | 3.36E+05 | 2.79E+05 | 3.26E+05 | 2.66E+05 | 2.74E+05 | 2.14E+05 | 3.29E+05 | 2.21E+05 | 2.14E+05 | 2.81E-01 | 3.11E-01 | 9.96E-01 | -0.32 | -0.30 | 0.02  |
| AOA1D3JUC7 | 2 (0)   | 5.0   | NA       | NA    | NA    | NA    |
| AOA1D3JUD1 | 9 (4)   | 48.4  | 5.53E-05 | 2.09E+05 | 1.85E+05 | 2.04E+05 | 2.42E+05 | 2.59E+05 | 2.54E+05 | 3.04E+05 | 3.07E+05 | 2.91E+05 | 1.68E-03 | 4.33E-05 | 2.53E-03 | 0.34  | 0.60  | 0.26  |
| AOA1D3JUF4 | 4 (1)   | 25.0  | 2.34E-02 | 1.38E+04 | 1.48E+04 | 1.58E+04 | 3.17E+04 | 3.03E+04 | 3.68E+04 | 2.47E+04 | 4.78E+04 | 5.08E+04 | 8.95E-02 | 2.14E-02 | 5.07E-01 | 1.15  | 1.47  | 0.32  |
| AOA1D3JUH6 | 2 (0)   | 11.5  | NA       | NA    | NA    | NA    |
| AOA1D3JUH9 | 7 (0)   | 36.8  | NA       | NA    | NA    | NA    |
| AOA1D3JUJ4 | 5 (1)   | 29.1  | 2.25E-01 | 3.53E+04 | 2.17E+04 | 2.42E+04 | 4.18E+04 | 5.03E+04 | 3.47E+04 | 6.26E+04 | 3.59E+04 | 3.20E+04 | 3.04E-01 | 2.58E-01 | 9.90E-01 | 0.64  | 0.68  | 0.04  |
| AOA1D3JUJ8 | 5 (2)   | 30.5  | 1.52E-02 | 6.94E+04 | 4.16E+04 | 5.99E+04 | 3.92E+04 | 4.96E+04 | 3.30E+04 | 2.93E+04 | 1.48E+04 | 1.69E+04 | 2.18E-01 | 1.26E-02 | 1.23E-01 | -0.49 | -1.49 | -1.00 |
| AOA1D3JUN6 | 9 (1)   | 51.5  | NA       | NA    | NA    | NA    |
| AOA1D3JUP1 | 3 (0)   | 17.6  | NA       | NA    | NA    | NA    |
| AOA1D3JUP9 | 2 (0)   | 10.4  | NA       | NA    | NA    | NA    |
| AOA1D3JUR6 | 2 (0)   | 9.5   | NA       | NA    | NA    | NA    |
| AOA1D3JUR8 | 2 (2)   | 6.0   | 2.04E-04 | 2.59E+03 | 2.54E+03 | 3.14E+03 | 1.02E+04 | 9.46E+03 | 1.01E+04 | 8.74E+03 | 5.99E+03 | 8.43E+03 | 1.85E-04 | 1.37E-03 | 6.07E-02 | 1.84  | 1.49  | -0.36 |
| AOA1D3JUR9 | 2 (0)   | 10.7  | NA       | NA    | NA    | NA    |
| AOA1D3JUS2 | 3 (0)   | 19.3  | NA       | NA    | NA    | NA    |
| AOA1D3JUS8 | 13 (3)  | 94.1  | 8.60E-01 | 3.55E+05 | 1.57E+05 | 2.20E+05 | 2.16E+05 | 2.24E+05 | 2.13E+05 | 2.32E+05 | 2.05E+05 | 2.89E+05 | 8.74E-01 | 9.99E-01 | 8.91E-01 | -0.16 | -0.01 | 0.15  |
| AOA1D3JUT5 | 5 (1)   | 23.4  | 4.70E-02 | 1.20E+05 | 8.63E+04 | 9.98E+04 | 1.05E+05 | 1.33E+05 | 7.75E+04 | 7.40E+04 | 4.09E+04 | 5.01E+04 | 9.84E-01 | 7.61E-02 | 6.12E-02 | 0.04  | -0.89 | -0.93 |
| AOA1D3JUT7 | 6 (3)   | 48.3  | 1.78E-01 | 3.76E+05 | 3.01E+05 | 4.04E+05 | 2.69E+05 | 2.87E+05 | 2.05E+05 | 3.97E+05 | 2.92E+05 | 2.43E+05 | 1.58E-01 | 6.00E-01 | 5.22E-01 | -0.50 | -0.21 | 0.29  |
| AOA1D3JUT9 | 9 (0)   | 57.9  | NA       | NA    | NA    | NA    |
| AOA1D3JUJ2 | 4 (0)   | 30.4  | NA       | NA    | NA    | NA    |
| AOA1D3JUJ1 | 13 (2)  | 78.6  | 5.35E-02 | 3.11E+04 | 2.49E+04 | 3.22E+04 | 1.51E+04 | 1.86E+04 | 1.31E+04 | 2.74E+04 | 1.14E+04 | 1.23E+04 | 6.44E-02 | 9.38E-02 | 9.53E-01 | -0.91 | -0.79 | 0.13  |
| AOA1D3JUW4 | 9 (1)   | 54.1  | 6.89E-01 | 3.37E+04 | 5.56E+04 | 4.57E+04 | 4.50E+04 | 3.96E+04 | 7.30E+04 | 3.01E+04 | 5.80E+04 | 3.85E+04 | 8.13E-01 | 9.69E-01 | 6.81E-01 | 0.22  | -0.09 | -0.32 |
| AOA1D3JUJ1 | 2 (0)   | 21.4  | NA       | NA    | NA    | NA    |

|            |          |       |          |          |          |          |          |          |          |          |          |          |          |          |          |       |       |       |
|------------|----------|-------|----------|----------|----------|----------|----------|----------|----------|----------|----------|----------|----------|----------|----------|-------|-------|-------|
| A0A1D3JUY3 | 2 (1)    | 10.2  | 2.38E-01 | 9.34E+03 | 5.19E+03 | 5.13E+03 | 9.52E+03 | 9.82E+03 | 7.56E+03 | 8.48E+03 | 1.01E+04 | 7.73E+03 | 2.70E-01 | 3.21E-01 | 9.89E-01 | 0.45  | 0.42  | -0.03 |
| A0A1D3JV13 | 16 (4)   | 88.9  | 7.77E-03 | 3.41E+05 | 2.86E+05 | 2.93E+05 | 5.51E+05 | 6.59E+05 | 3.46E+05 | 1.55E+06 | 1.17E+06 | 8.29E+05 | 5.26E-01 | 7.75E-03 | 2.70E-02 | 0.76  | 1.95  | 1.19  |
| A0A1D3JV15 | 3 (1)    | 34.7  | NA       | NA    | NA    | NA    |
| A0A1D3JV23 | 3 (0)    | 14.4  | NA       | NA    | NA    | NA    |
| A0A1D3JV29 | 4 (0)    | 20.5  | NA       | NA    | NA    | NA    |
| A0A1D3JV34 | 11 (1)   | 69.6  | 1.08E-04 | 8.83E+03 | 5.79E+03 | 7.38E+03 | 1.08E+03 | 1.23E+03 | 1.10E+03 | 5.56E+00 | 1.03E+02 | 0.00E+00 | 3.29E-04 | 1.31E-04 | 3.41E-01 | -2.69 | -7.67 | -4.98 |
| A0A1D3JV37 | 2 (0)    | 8.0   | NA       | NA    | NA    | NA    |
| A0A1D3JV41 | 17 (1)   | 85.0  | 6.60E-01 | 1.68E+05 | 1.28E+05 | 1.54E+05 | 1.34E+05 | 1.50E+05 | 1.11E+05 | 1.89E+05 | 1.40E+05 | 1.19E+05 | 6.98E-01 | 9.99E-01 | 7.17E-01 | -0.18 | -0.01 | 0.18  |
| A0A1D3JV48 | 3 (0)    | 17.8  | NA       | NA    | NA    | NA    |
| A0A1D3JV62 | 5 (0)    | 25.2  | NA       | NA    | NA    | NA    |
| A0A1D3JV63 | 3 (0)    | 14.7  | NA       | NA    | NA    | NA    |
| A0A1D3JV75 | 23 (8)   | 217.5 | 2.28E-03 | 7.25E+05 | 8.02E+05 | 8.59E+05 | 9.63E+05 | 9.74E+05 | 1.13E+06 | 5.49E+05 | 6.97E+05 | 5.71E+05 | 3.23E-02 | 6.54E-02 | 1.84E-03 | 0.36  | -0.39 | -0.76 |
| A0A1D3JV78 | 4 (0)    | 16.9  | NA       | NA    | NA    | NA    |
| A0A1D3JV86 | 19 (8)   | 127.1 | 4.01E-02 | 7.50E+05 | 6.80E+05 | 7.57E+05 | 5.87E+05 | 5.98E+05 | 6.01E+05 | 7.10E+05 | 6.34E+05 | 5.62E+05 | 3.73E-02 | 1.29E-01 | 6.08E-01 | -0.29 | -0.20 | 0.09  |
| A0A1D3JV89 | 3 (0)    | 17.2  | NA       | NA    | NA    | NA    |
| A0A1D3JV93 | 3 (0)    | 18.9  | NA       | NA    | NA    | NA    |
| A0A1D3JVA1 | 26 (10)  | 166.4 | 5.11E-04 | 4.39E+05 | 3.67E+05 | 3.94E+05 | 1.31E+06 | 1.40E+06 | 1.45E+06 | 2.52E+06 | 2.92E+06 | 3.87E+06 | 5.43E-02 | 4.32E-04 | 4.80E-03 | 1.80  | 2.96  | 1.16  |
| A0A1D3JVA7 | 25 (11)  | 165.5 | 8.43E-02 | 1.70E+06 | 1.53E+06 | 1.82E+06 | 1.84E+06 | 1.97E+06 | 1.69E+06 | 2.79E+06 | 2.74E+06 | 1.77E+06 | 8.63E-01 | 8.77E-02 | 1.71E-01 | 0.12  | 0.53  | 0.41  |
| A0A1D3JVA8 | 14 (8)   | 96.9  | 5.98E-05 | 1.88E+05 | 1.94E+05 | 2.06E+05 | 5.40E+05 | 5.40E+05 | 6.73E+05 | 6.14E+05 | 6.19E+05 | 6.74E+05 | 1.59E-04 | 7.86E-05 | 4.52E-01 | 1.58  | 1.70  | 0.12  |
| A0A1D3JVA9 | 4 (0)    | 19.4  | NA       | NA    | NA    | NA    |
| A0A1D3JVB2 | 8 (2)    | 65.1  | 9.48E-01 | 1.20E+04 | 1.97E+04 | 1.36E+04 | 1.22E+04 | 1.39E+04 | 1.49E+04 | 2.36E+04 | 7.62E+03 | 1.27E+04 | 9.45E-01 | 9.94E-01 | 9.75E-01 | -0.14 | -0.05 | 0.09  |
| A0A1D3JVB3 | 8 (1)    | 41.7  | 2.39E-03 | 1.09E+04 | 1.15E+04 | 1.15E+04 | 2.11E+04 | 2.02E+04 | 2.58E+04 | 2.16E+04 | 2.81E+04 | 3.01E+04 | 1.11E-02 | 2.27E-03 | 2.96E-01 | 0.99  | 1.23  | 0.25  |
| A0A1D3JVC4 | 2 (1)    | 12.5  | 6.91E-01 | 1.33E+04 | 5.64E+03 | 6.78E+03 | 1.05E+04 | 1.24E+04 | 8.54E+03 | 1.09E+04 | 1.02E+04 | 8.76E+03 | 6.84E-01 | 8.13E-01 | 9.71E-01 | 0.29  | 0.22  | -0.07 |
| A0A1D3JVC5 | 6 (2)    | 37.8  | 3.95E-02 | 1.39E+04 | 1.12E+04 | 1.08E+04 | 3.00E+04 | 2.54E+04 | 2.28E+04 | 2.73E+04 | 3.49E+04 | 6.10E+04 | 2.99E-01 | 3.31E-02 | 2.60E-01 | 1.12  | 1.78  | 0.66  |
| A0A1D3JVD0 | 7 (5)    | 66.6  | 4.48E-03 | 1.02E+05 | 1.10E+05 | 1.13E+05 | 4.07E+05 | 4.13E+05 | 4.53E+05 | 1.99E+05 | 4.41E+05 | 3.51E+05 | 4.14E-03 | 2.16E-02 | 3.19E-01 | 1.97  | 1.61  | -0.36 |
| A0A1D3JVD1 | 105 (28) | 588.2 | 1.04E-02 | 1.13E+06 | 9.13E+05 | 1.04E+06 | 3.14E+06 | 3.35E+06 | 4.21E+06 | 4.57E+06 | 7.18E+06 | 1.03E+07 | 2.33E-01 | 8.75E-03 | 7.40E-02 | 1.79  | 2.83  | 1.04  |
| A0A1D3JVD3 | 30 (6)   | 214.3 | 3.20E-06 | 4.29E+04 | 4.69E+04 | 4.73E+04 | 2.65E+05 | 2.51E+05 | 2.49E+05 | 2.86E+05 | 2.51E+05 | 2.40E+05 | 5.71E-06 | 5.07E-06 | 9.43E-01 | 2.48  | 2.50  | 0.02  |
| A0A1D3JVD5 | 4 (0)    | 22.2  | NA       | NA    | NA    | NA    |
| A0A1D3JVF7 | 3 (1)    | 14.2  | 7.32E-01 | 8.13E+01 | 1.52E+03 | 9.01E+02 | 4.44E+02 | 2.30E+02 | 1.09E+03 | 0.00E+00 | 4.84E+02 | 9.27E+02 | 8.58E-01 | 7.19E-01 | 9.63E-01 | -0.50 | -0.82 | -0.33 |
| A0A1D3JVI5 | 19 (6)   | 152.3 | 3.12E-03 | 8.28E+05 | 8.09E+05 | 9.32E+05 | 6.42E+05 | 6.53E+05 | 5.95E+05 | 5.92E+05 | 4.44E+05 | 3.52E+05 | 3.36E-02 | 2.55E-03 | 1.02E-01 | -0.44 | -0.89 | -0.44 |
| A0A1D3JVK4 | 23 (7)   | 147.8 | 8.91E-04 | 6.63E+05 | 5.68E+05 | 6.72E+05 | 9.08E+05 | 9.98E+05 | 8.36E+05 | 1.06E+06 | 1.28E+06 | 1.26E+06 | 2.30E-02 | 7.07E-04 | 2.12E-02 | 0.53  | 0.92  | 0.39  |
| A0A1D3JVL2 | 15 (6)   | 109.4 | 1.35E-04 | 3.40E+05 | 4.04E+05 | 3.99E+05 | 2.25E+05 | 2.24E+05 | 2.06E+05 | 2.17E+05 | 2.24E+05 | 2.19E+05 | 2.32E-04 | 2.49E-04 | 9.93E-01 | -0.81 | -0.79 | 0.01  |
| A0A1D3JVM1 | 28 (9)   | 146.2 | 1.29E-01 | 2.39E+05 | 2.02E+05 | 2.37E+05 | 2.44E+05 | 2.50E+05 | 2.42E+05 | 2.72E+05 | 2.36E+05 | 2.95E+05 | 5.39E-01 | 1.13E-01 | 4.43E-01 | 0.12  | 0.25  | 0.13  |
| A0A1D3JVM7 | 2 (0)    | 54.7  | NA       | NA    | NA    | NA    |
| A0A1D3JVN9 | 18 (3)   | 113.3 | 2.36E-01 | 2.43E+03 | 9.54E+03 | 2.43E+03 | 1.33E+04 | 7.41E+03 | 4.85E+04 | 4.23E+03 | 6.34E+03 | 6.96E+03 | 2.75E-01 | 9.95E-01 | 3.10E-01 | 2.27  | 0.28  | -1.98 |
| A0A1D3JVP1 | 15 (1)   | 94.5  | 5.31E-01 | 6.22E+04 | 4.53E+04 | 5.44E+04 | 5.33E+04 | 6.51E+04 | 4.39E+04 | 9.54E+04 | 4.14E+04 | 6.93E+04 | 1.00E+00 | 5.85E-01 | 5.90E-01 | 0.00  | 0.35  | 0.34  |
| A0A1D3JVP7 | 16 (3)   | 74.2  | 3.21E-01 | 1.62E+05 | 1.31E+05 | 1.54E+05 | 1.78E+05 | 1.76E+05 | 1.55E+05 | 1.79E+05 | 1.60E+05 | 1.44E+05 | 2.96E-01 | 6.27E-01 | 7.74E-01 | 0.19  | 0.11  | -0.08 |
| A0A1D3JVQ0 | 6 (1)    | 38.1  | 6.28E-01 | 3.17E+02 | 4.76E+03 | 5.72E+02 | 6.35E+02 | 3.46E+02 | 1.34E+04 | 3.05E+02 | 9.16E+02 | 2.61E+03 | 7.31E-01 | 9.86E-01 | 6.39E-01 | 1.34  | -0.56 | -1.91 |
| A0A1D3JVQ9 | 6 (1)    | 38.7  | 2.80E-03 | 1.43E+03 | 1.30E+03 | 1.02E+03 | 6.28E+03 | 7.59E+03 | 1.28E+04 | 1.86E+04 | 1.19E+04 | 1.45E+04 | 3.52E-02 | 2.27E-03 | 8.17E-02 | 3.24  | 3.37  | 0.13  |
| A0A1D3JVR7 | 7 (3)    | 52.5  | 2.52E-01 | 1.53E+05 | 1.25E+05 | 1.39E+05 | 1.25E+05 | 1.39E+05 | 1.29E+05 | 1.71E+05 | 1.40E+05 | 1.42E+05 | 7.43E-01 | 5.45E-01 | 2.30E-01 | -0.09 | 0.12  | 0.21  |
| A0A1D3JVR8 | 3 (0)    | 19.2  | NA       | NA    | NA    | NA    |
| A0A1D3JVS3 | 18 (4)   | 111.8 | 5.31E-02 | 2.54E+05 | 2.29E+05 | 2.60E+05 | 1.95E+05 | 1.93E+05 | 1.90E+05 | 2.47E+05 | 2.06E+05 | 1.80E+05 | 4.80E-02 | 1.78E-01 | 5.83E-01 | -0.36 | -0.23 | 0.13  |
| A0A1D3JVS5 | 2 (1)    | 10.0  | 8.56E-02 | 0.00E+00 | 0.00E+00 | 0.00E+00 | 3.26E+02 | 2.75E+02 | 3.62E+02 | 1.12E+03 | 2.65E+03 | 7.03E+03 | 9.73E-01 | 1.03E-01 | 1.37E-01 | 3.65  | 6.40  | 3.49  |
| A0A1D3JVS6 | 21 (7)   | 117.6 | 4.41E-02 | 3.60E+05 | 2.92E+05 | 3.50E+05 | 2.46E+05 | 2.55E+05 | 1.98E+05 | 3.40E+05 | 2.72E+05 | 2.59E+05 | 3.75E-02 | 3.85E-01 | 2.26E-01 | -0.52 | -0.20 | 0.32  |
| A0A1D3JVT4 | 6 (2)    | 20.4  | 3.54E-01 | 1.47E+04 | 2.23E+04 | 1.35E+04 | 1.55E+04 | 2.06E+04 | 4.42E+04 | 1.62E+04 | 3.95E+04 | 4.19E+04 | 6.11E-01 | 3.32E-01 | 8.40E-01 | 0.67  | 0.95  | 0.28  |
| A0A1D3JVT8 | 3 (0)    | 14.4  | NA       | NA    | NA    | NA    |
| A0A1D3JVV1 | 3 (1)    | 25.0  | 2.87E-06 | 3.62E+03 | 3.41E+03 | 3.43E+03 | 2.05E+03 | 2.39E+03 | 2.20E+03 | 1.42E+03 | 1.32E+03 | 1.22E+03 | 5.17E-05 | 2.15E-06 | 3.90E-04 | -0.66 | -1.40 | -0.74 |
| A0A1D3JVV7 | 7 (1)    | 34.2  | 4.75E-01 | 3.93E+04 | 5.59E+04 | 4.85E+04 | 3.65E+04 | 4.42E+04 | 2.08E+04 | 5.91E+04 | 2.97E+04 | 2.38E+04 | 4.69E-01 | 6.46E-01 | 9.43E-01 | -0.50 | -0.35 | 0.15  |
| A0A1D3JVV0 | 5 (1)    | 37.4  | 5.81E-01 | 2.87E+02 | 6.40E+03 | 6.98E+02 | 1.06E+03 | 6.89E+02 | 7.85E+03 | 0.00E+00 | 3.13E+02 | 1.32E+03 | 9.54E-01 | 7.37E-01 | 5.72E-01 | 0.38  | -2.18 | -2.56 |
| A0A1D3JVV9 | 13 (6)   | 81.9  | 6.70E-03 | 1.04E+05 | 1.12E+05 | 1.08E+05 | 1.66E+05 | 1.61E+05 | 1.88E+05 | 1.43E+05 | 1.94E+05 | 1.70E+05 | 9.86E-03 | 1.20E-02 | 9.81E-01 | 0.67  | 0.65  | -0.02 |
| A0A1D3JVV1 | 7 (1)    | 44.3  | 3.63E-02 | 1.77E+05 | 1.46E+05 | 1.93E+05 | 1.68E+05 | 1.19E+05 | 8.99E+04 | 2.15E+05 | 1.67E+05 | 1.38E+05 | 5.53E-02 | 9.98E-01 | 5.17E-02 | -0.71 | 0.01  | 0.72  |
| A0A1D3JVV6 | 3 (1)    | 11.1  | 5.45E-02 | 6.83E+03 | 4.79E+03 | 5.66E+03 | 3.83E+03 | 3.75E+03 | 2.44E+03 | 4.77E+03 | 1.73E+03 | 2.32E+03 | 1.04E-01 | 6.19E-02 | 9.13E-01 | -0.79 | -0.97 | -0.18 |

[illegible]

|            |         |       |          |          |          |          |          |          |          |          |          |          |          |          |          |       |       |       |
|------------|---------|-------|----------|----------|----------|----------|----------|----------|----------|----------|----------|----------|----------|----------|----------|-------|-------|-------|
| A0A1D3JWY7 | 3 (2)   | 15.0  | 4.41E-01 | 9.46E+04 | 8.38E+04 | 1.06E+05 | 8.53E+04 | 8.33E+04 | 6.35E+04 | 1.52E+05 | 8.11E+04 | 8.28E+04 | 6.88E-01 | 8.71E-01 | 4.18E-01 | -0.29 | 0.15  | 0.44  |
| A0A1D3JWZ7 | 12 (4)  | 80.3  | 5.97E-02 | 3.16E+04 | 3.37E+04 | 3.16E+04 | 3.50E+04 | 3.40E+04 | 4.07E+04 | 4.70E+04 | 4.12E+04 | 6.75E+04 | 8.10E-01 | 6.11E-02 | 1.36E-01 | 0.18  | 0.69  | 0.51  |
| A0A1D3JX08 | 12 (0)  | 70.4  | NA       | NA    | NA    | NA    |
| A0A1D3JX27 | 3 (0)   | 16.5  | NA       | NA    | NA    | NA    |
| A0A1D3JX36 | 12 (2)  | 101.5 | NA       | NA    | NA    | NA    |
| A0A1D3JX42 | 3 (1)   | 9.2   | 1.54E-03 | 1.05E+04 | 7.75E+03 | 1.05E+04 | 1.04E+04 | 1.07E+04 | 8.16E+03 | 2.74E+04 | 3.30E+04 | 2.11E+04 | 9.99E-01 | 2.56E-03 | 2.67E-03 | 0.02  | 1.50  | 1.48  |
| A0A1D3JX46 | 53 (15) | 310.2 | 5.94E-01 | 1.02E+06 | 8.50E+05 | 9.98E+05 | 8.88E+05 | 9.20E+05 | 8.34E+05 | 1.03E+06 | 9.69E+05 | 8.08E+05 | 5.85E-01 | 9.58E-01 | 7.44E-01 | -0.12 | -0.03 | 0.09  |
| A0A1D3JX49 | 35 (12) | 264.2 | 2.36E-02 | 6.72E+05 | 6.12E+05 | 6.99E+05 | 5.79E+05 | 5.80E+05 | 5.41E+05 | 5.87E+05 | 4.83E+05 | 4.61E+05 | 1.17E-01 | 2.04E-02 | 3.85E-01 | -0.22 | -0.37 | -0.15 |
| A0A1D3JX53 | 3 (2)   | 11.3  | 9.31E-01 | 6.10E+04 | 8.93E+04 | 6.88E+04 | 6.93E+04 | 6.12E+04 | 1.06E+05 | 5.96E+04 | 9.43E+04 | 7.36E+04 | 9.25E-01 | 9.82E-01 | 9.78E-01 | 0.11  | 0.05  | -0.06 |
| A0A1D3JX55 | 2 (0)   | 5.7   | NA       | NA    | NA    | NA    |
| A0A1D3JXE2 | 11 (4)  | 53.5  | 2.55E-02 | 1.06E+05 | 8.24E+04 | 1.05E+05 | 5.38E+04 | 5.69E+04 | 4.43E+04 | 8.67E+04 | 5.09E+04 | 8.80E+04 | 2.12E-02 | 2.29E-01 | 2.11E-01 | -0.92 | -0.38 | 0.54  |
| A0A1D3JXE5 | 2 (0)   | 10.2  | NA       | NA    | NA    | NA    |
| A0A1D3JXF1 | 3 (0)   | 11.2  | NA       | NA    | NA    | NA    |
| A0A1D3JXF4 | 12 (4)  | 69.1  | 3.48E-03 | 2.01E+04 | 8.68E+03 | 1.44E+04 | 2.32E+04 | 2.70E+04 | 1.67E+04 | 5.07E+04 | 3.76E+04 | 5.92E+04 | 4.66E-01 | 3.56E-03 | 1.25E-02 | 0.63  | 1.77  | 1.14  |
| A0A1D3JXG1 | 13 (10) | 85.7  | 9.99E-04 | 4.14E+05 | 3.47E+05 | 4.06E+05 | 5.34E+05 | 6.12E+05 | 4.56E+05 | 8.88E+05 | 7.21E+05 | 9.02E+05 | 1.26E-01 | 8.86E-04 | 6.69E-03 | 0.46  | 1.11  | 0.65  |
| A0A1D3JXG4 | 3 (0)   | 16.3  | NA       | NA    | NA    | NA    |
| A0A1D3JXH4 | 2 (0)   | 16.2  | NA       | NA    | NA    | NA    |
| A0A1D3JXH6 | 6 (1)   | 56.8  | NA       | NA    | NA    | NA    |
| A0A1D3JXK1 | 5 (1)   | 19.8  | 2.22E-03 | 6.80E+04 | 6.93E+04 | 7.55E+04 | 2.94E+04 | 2.94E+04 | 2.46E+04 | 4.68E+04 | 3.35E+04 | 1.66E+04 | 2.90E-03 | 5.06E-03 | 8.25E-01 | -1.35 | -1.13 | 0.22  |
| A0A1D3JXK8 | 2 (1)   | 9.7   | 1.16E-01 | 6.32E+03 | 1.50E+04 | 7.26E+03 | 1.63E+04 | 1.16E+04 | 2.99E+04 | 3.81E+03 | 7.20E+03 | 9.62E+03 | 2.27E-01 | 8.69E-01 | 1.19E-01 | 1.02  | -0.47 | -1.49 |
| A0A1D3JXL3 | 4 (1)   | 39.0  | 5.51E-03 | 5.81E+03 | 3.72E+03 | 3.93E+03 | 7.44E+03 | 8.39E+03 | 5.44E+03 | 9.28E+03 | 9.07E+03 | 9.31E+03 | 6.14E-02 | 4.48E-03 | 1.19E-01 | 0.66  | 1.04  | 0.38  |
| A0A1D3JXM3 | 12 (6)  | 123.5 | 4.27E-03 | 2.39E+06 | 2.49E+06 | 2.08E+06 | 2.08E+06 | 2.45E+06 | 1.95E+06 | 1.51E+06 | 1.14E+06 | 1.45E+06 | 6.74E-01 | 4.85E-03 | 1.18E-02 | -0.10 | -0.76 | -0.66 |
| A0A1D3JXN6 | 38 (5)  | 247.2 | 4.12E-03 | 1.09E+06 | 9.08E+05 | 9.90E+05 | 6.65E+05 | 7.46E+05 | 5.64E+05 | 6.81E+05 | 5.29E+05 | 4.48E+05 | 1.51E-02 | 4.14E-03 | 4.58E-01 | -0.60 | -0.85 | -0.25 |
| A0A1D3JXQ1 | 13 (6)  | 93.6  | 1.67E-01 | 5.35E+05 | 4.03E+05 | 4.50E+05 | 5.48E+05 | 6.31E+05 | 4.84E+05 | 6.12E+05 | 5.13E+05 | 5.88E+05 | 2.67E-01 | 1.80E-01 | 9.47E-01 | 0.26  | 0.30  | 0.04  |
| A0A1D3JXQ3 | 2 (1)   | 12.0  | 7.96E-01 | 1.74E+03 | 5.90E+03 | 2.80E+03 | 3.45E+03 | 2.20E+03 | 1.04E+04 | 6.70E+01 | 7.59E+03 | 3.66E+03 | 8.05E-01 | 9.95E-01 | 8.55E-01 | 0.62  | 0.12  | -0.50 |
| A0A1D3JXQ4 | 6 (2)   | 39.8  | 4.16E-01 | 6.59E+03 | 7.12E+03 | 8.32E+03 | 9.49E+03 | 8.56E+03 | 8.96E+03 | 1.05E+04 | 6.87E+03 | 6.15E+03 | 4.03E-01 | 9.12E-01 | 6.16E-01 | 0.29  | 0.09  | -0.20 |
| A0A1D3JXR9 | 7 (3)   | 48.3  | 2.18E-02 | 1.68E+05 | 1.70E+05 | 1.72E+05 | 2.53E+05 | 2.43E+05 | 2.92E+05 | 2.07E+05 | 2.53E+05 | 3.04E+05 | 2.81E-02 | 4.02E-02 | 9.51E-01 | 0.63  | 0.58  | -0.04 |
| A0A1D3JXS0 | 12 (6)  | 76.0  | 2.21E-04 | 2.64E+05 | 2.64E+05 | 2.97E+05 | 1.78E+05 | 1.83E+05 | 1.68E+05 | 1.55E+05 | 1.32E+05 | 1.04E+05 | 1.61E-03 | 1.97E-04 | 5.42E-02 | -0.64 | -1.08 | -0.44 |
| A0A1D3JXT0 | 14 (3)  | 56.9  | NA       | NA    | NA    | NA    |
| A0A1D3JXT3 | 11 (3)  | 54.7  | NA       | NA    | NA    | NA    |
| A0A1D3JXT7 | 15 (2)  | 89.5  | 4.40E-02 | 6.71E+04 | 5.80E+04 | 6.73E+04 | 3.78E+04 | 4.20E+04 | 2.60E+04 | 6.01E+04 | 3.42E+04 | 2.83E+04 | 4.64E-02 | 1.00E-01 | 8.18E-01 | -0.86 | -0.65 | 0.21  |
| A0A1D3JXU0 | 8 (2)   | 40.5  | 1.56E-01 | 7.04E+04 | 5.25E+04 | 6.22E+04 | 5.16E+04 | 5.64E+04 | 3.40E+04 | 7.98E+04 | 7.95E+04 | 5.19E+04 | 4.00E-01 | 6.89E-01 | 1.41E-01 | -0.38 | 0.19  | 0.57  |
| A0A1D3JXW0 | 12 (1)  | 45.7  | NA       | NA    | NA    | NA    |
| A0A1D3JXW3 | 24 (6)  | 148.7 | 1.10E-01 | 3.13E+05 | 2.75E+05 | 3.15E+05 | 2.56E+05 | 2.76E+05 | 2.15E+05 | 3.68E+05 | 3.01E+05 | 2.83E+05 | 2.29E-01 | 8.33E-01 | 1.09E-01 | -0.27 | 0.08  | 0.35  |
| A0A1D3JXX3 | 2 (0)   | 10.4  | NA       | NA    | NA    | NA    |
| A0A1D3JXY5 | 2 (1)   | 11.1  | 3.57E-03 | 4.10E+03 | 5.30E+03 | 3.49E+03 | 1.29E+03 | 2.18E+03 | 3.16E+03 | 2.44E+01 | 9.49E+02 | 5.94E+02 | 4.32E-02 | 2.89E-03 | 9.34E-02 | -0.96 | -3.04 | -2.08 |
| A0A1D3JY00 | 10 (1)  | 65.4  | 7.44E-01 | 5.36E+03 | 6.15E+02 | 4.70E+02 | 1.23E+03 | 4.66E+03 | 1.14E+03 | 1.17E+03 | 1.44E+03 | 8.39E+02 | 9.92E-01 | 8.17E-01 | 7.53E-01 | 0.12  | -0.90 | -1.03 |
| A0A1D3JY17 | 7 (2)   | 53.6  | 1.03E-01 | 9.18E+03 | 1.01E+04 | 1.22E+04 | 1.29E+04 | 1.33E+04 | 1.56E+04 | 1.15E+04 | 1.36E+04 | 1.60E+04 | 1.25E-01 | 1.57E-01 | 9.82E-01 | 0.41  | 0.38  | -0.03 |
| A0A1D3JY18 | 10 (4)  | 65.8  | 6.87E-02 | 8.32E+05 | 6.53E+05 | 7.68E+05 | 6.00E+05 | 2.75E+05 | 5.55E+05 | 6.06E+05 | 5.51E+05 | 5.23E+05 | 6.41E-02 | 1.93E-01 | 6.78E-01 | -0.65 | -0.42 | 0.23  |
| A0A1D3JY20 | 10 (1)  | 67.8  | NA       | NA    | NA    | NA    |
| A0A1D3JY28 | 15 (7)  | 102.0 | 2.03E-04 | 1.82E+05 | 1.70E+05 | 1.82E+05 | 1.61E+05 | 1.73E+05 | 1.55E+05 | 3.06E+05 | 3.22E+05 | 3.82E+05 | 7.32E-01 | 4.73E-04 | 2.84E-04 | -0.13 | 0.92  | 1.05  |
| A0A1D3JY32 | 9 (1)   | 34.8  | NA       | NA    | NA    | NA    |
| A0A1D3JY35 | 2 (0)   | 11.9  | NA       | NA    | NA    | NA    |
| A0A1D3JY37 | 24 (7)  | 161.9 | 7.35E-02 | 4.38E+05 | 3.56E+05 | 4.35E+05 | 4.81E+05 | 5.40E+05 | 4.32E+05 | 4.02E+05 | 3.09E+05 | 3.90E+05 | 2.45E-01 | 5.79E-01 | 6.55E-02 | 0.24  | -0.16 | -0.40 |
| A0A1D3JY38 | 2 (0)   | 16.5  | NA       | NA    | NA    | NA    |
| A0A1D3JY39 | 49 (11) | 412.3 | 1.20E-02 | 1.31E+06 | 1.05E+06 | 1.21E+06 | 1.29E+06 | 1.30E+06 | 1.32E+06 | 1.60E+06 | 1.81E+06 | 2.25E+06 | 7.85E-01 | 1.36E-02 | 2.93E-02 | 0.13  | 0.67  | 0.54  |
| A0A1D3JY42 | 2 (1)   | 11.9  | 6.53E-02 | 6.28E+03 | 3.26E+03 | 3.23E+03 | 1.60E+03 | 4.40E+02 | 1.36E+03 | 3.44E+03 | 1.42E+03 | 7.29E+02 | 6.55E-02 | 1.52E-01 | 7.91E-01 | -1.91 | -1.19 | 0.72  |
| A0A1D3JY45 | 12 (3)  | 74.2  | 3.16E-01 | 1.03E+04 | 9.54E+03 | 1.25E+04 | 8.68E+03 | 8.35E+03 | 9.46E+03 | 8.84E+03 | 1.06E+04 | 1.44E+04 | 4.58E-01 | 9.50E-01 | 3.24E-01 | -0.29 | 0.06  | 0.35  |
| A0A1D3JY51 | 4 (1)   | 21.7  | 3.97E-01 | 2.67E+04 | 2.17E+04 | 2.84E+04 | 2.56E+04 | 2.74E+04 | 2.12E+04 | 2.74E+04 | 1.67E+04 | 1.81E+04 | 9.66E-01 | 4.07E-01 | 5.32E-01 | -0.05 | -0.30 | -0.25 |
| A0A1D3JY52 | 4 (1)   | 27.0  | 2.45E-04 | 9.34E+03 | 8.70E+03 | 1.02E+04 | 1.00E+03 | 9.77E+02 | 9.92E+02 | 5.47E+03 | 2.34E+03 | 2.38E+03 | 2.28E-04 | 1.45E-03 | 8.60E-02 | -3.25 | -1.47 | 1.78  |
| A0A1D3JY58 | 5 (1)   | 21.9  | 7.41E-02 | 2.45E+02 | 1.12E+03 | 1.35E+03 | 1.99E+03 | 1.81E+03 | 1.27E+03 | 0.00E+00 | 1.15E+03 | 1.87E+02 | 2.47E-01 | 5.79E-01 | 6.60E-02 | 0.91  | -1.02 | -1.92 |
| A0A1D3JY66 | 23 (7)  | 146.8 | 1.54E-03 | 4.58E+05 | 4.61E+05 | 4.34E+05 | 2.74E+05 | 3.24E+05 | 2.98E+05 | 1.86E+05 | 2.94E+05 | 1.66E+05 | 1.18E-02 | 1.32E-03 | 1.21E-01 | -0.59 | -1.07 | -0.47 |

|            |         |       |          |          |          |          |          |          |          |          |          |          |          |          |          |       |       |       |
|------------|---------|-------|----------|----------|----------|----------|----------|----------|----------|----------|----------|----------|----------|----------|----------|-------|-------|-------|
| A0A1D3JY68 | 5 (1)   | 35.4  | 2.36E-03 | 1.16E+05 | 8.93E+04 | 9.47E+04 | 1.32E+05 | 1.33E+05 | 1.04E+05 | 3.96E+05 | 2.36E+05 | 3.49E+05 | 8.34E-01 | 3.09E-03 | 5.33E-03 | 0.30  | 1.71  | 1.41  |
| A0A1D3JY71 | 5 (3)   | 29.4  | 1.82E-01 | 8.09E+03 | 1.27E+04 | 1.19E+04 | 1.95E+04 | 1.51E+04 | 3.40E+04 | 3.48E+03 | 1.67E+04 | 1.72E+04 | 2.00E-01 | 9.65E-01 | 2.75E-01 | 1.06  | 0.19  | -0.87 |
| A0A1D3JY75 | 7 (1)   | 58.0  | 1.63E-04 | 1.75E+05 | 1.19E+05 | 1.44E+05 | 6.19E+05 | 7.34E+05 | 5.14E+05 | 1.42E+05 | 1.43E+05 | 1.62E+05 | 2.85E-04 | 9.98E-01 | 2.95E-04 | 2.09  | 0.03  | -2.06 |
| A0A1D3JY85 | 2 (2)   | 12.0  | 1.49E-01 | 7.52E+03 | 1.45E+04 | 7.89E+03 | 5.32E+03 | 6.57E+03 | 1.11E+04 | 5.00E+03 | 1.20E+03 | 5.81E+03 | 6.65E-01 | 1.34E-01 | 4.01E-01 | -0.38 | -1.32 | -0.94 |
| A0A1D3JY92 | 13 (6)  | 92.9  | 8.88E-03 | 9.79E+04 | 1.65E+05 | 1.43E+05 | 1.49E+05 | 1.42E+05 | 1.91E+05 | 5.75E+04 | 7.56E+04 | 5.63E+04 | 4.93E-01 | 3.28E-02 | 8.62E-03 | 0.25  | -1.10 | -1.35 |
| A0A1D3JYA8 | 5 (1)   | 36.3  | 4.58E-02 | 3.98E+05 | 2.74E+05 | 3.48E+05 | 4.70E+05 | 6.46E+05 | 4.03E+05 | 7.57E+05 | 5.60E+05 | 5.48E+05 | 2.12E-01 | 3.94E-02 | 4.28E-01 | 0.57  | 0.87  | 0.30  |
| A0A1D3JYB7 | 10 (4)  | 50.7  | 9.19E-03 | 9.82E+04 | 8.74E+04 | 9.64E+04 | 6.25E+04 | 6.23E+04 | 6.06E+04 | 6.99E+04 | 4.37E+04 | 3.01E+04 | 4.04E-02 | 8.45E-03 | 4.00E-01 | -0.61 | -0.97 | -0.37 |
| A0A1D3JYC9 | 10 (2)  | 49.8  | 2.32E-01 | 1.37E+05 | 1.36E+05 | 1.57E+05 | 1.32E+05 | 1.35E+05 | 1.43E+05 | 1.47E+05 | 1.08E+05 | 9.03E+04 | 9.13E-01 | 2.33E-01 | 3.81E-01 | -0.06 | -0.31 | -0.25 |
| A0A1D3JYD7 | 7 (1)   | 45.3  | NA       | NA    | NA    | NA    |
| A0A1D3JYG5 | 8 (1)   | 67.5  | 2.05E-03 | 3.54E+04 | 3.47E+04 | 3.64E+04 | 3.71E+04 | 4.27E+04 | 4.12E+04 | 4.98E+04 | 6.35E+04 | 5.83E+04 | 4.20E-01 | 2.12E-03 | 7.45E-03 | 0.18  | 0.69  | 0.51  |
| A0A1D3JYH3 | 5 (0)   | 21.7  | NA       | NA    | NA    | NA    |
| A0A1D3JYH4 | 2 (0)   | 10.1  | NA       | NA    | NA    | NA    |
| A0A1D3JYJ0 | 2 (0)   | 10.7  | NA       | NA    | NA    | NA    |
| A0A1D3JYJ6 | 2 (1)   | 9.9   | 6.63E-01 | 5.39E+02 | 1.97E+03 | 3.80E+02 | 5.95E+02 | 8.47E+02 | 6.74E+02 | 5.37E+02 | 5.03E+02 | 3.72E+03 | 9.62E-01 | 8.01E-01 | 6.52E-01 | -0.45 | 0.72  | 1.17  |
| A0A1D3JYN7 | 5 (1)   | 78.4  | NA       | NA    | NA    | NA    |
| A0A1D3JYP8 | 19 (5)  | 138.2 | 1.42E-02 | 7.31E+04 | 6.97E+04 | 7.80E+04 | 5.90E+04 | 5.99E+04 | 4.67E+04 | 6.17E+04 | 5.08E+04 | 4.98E+04 | 2.51E-02 | 1.98E-02 | 9.77E-01 | -0.42 | -0.44 | -0.03 |
| A0A1D3JYP9 | 6 (1)   | 31.0  | 1.88E-01 | 3.44E+03 | 1.21E+04 | 9.95E+03 | 7.90E+03 | 8.94E+03 | 1.71E+04 | 0.00E+00 | 4.61E+03 | 6.84E+03 | 7.22E-01 | 4.44E-01 | 1.71E-01 | 0.42  | -1.15 | -1.57 |
| A0A1D3JYR3 | 32 (4)  | 78.3  | NA       | NA    | NA    | NA    |
| A0A1D3JYR4 | 13 (2)  | 98.5  | 3.02E-02 | 8.23E+02 | 9.41E+02 | 1.39E+03 | 1.15E+03 | 1.04E+03 | 1.13E+03 | 1.65E+03 | 1.41E+03 | 1.91E+03 | 9.51E-01 | 3.79E-02 | 5.48E-02 | 0.05  | 0.63  | 0.58  |
| A0A1D3JYS7 | 2 (1)   | 10.4  | 4.57E-01 | 1.39E+03 | 1.56E+03 | 1.53E+03 | 0.00E+00 | 1.72E+02 | 1.26E+02 | 7.62E+02 | 0.00E+00 | 1.41E+04 | 9.27E-01 | 6.45E-01 | 4.46E-01 | -3.91 | 1.73  | 5.64  |
| A0A1D3JYS9 | 4 (2)   | 20.3  | 4.52E-01 | 5.81E+04 | 3.93E+04 | 4.55E+04 | 5.55E+04 | 6.47E+04 | 4.54E+04 | 8.58E+04 | 4.74E+04 | 5.61E+04 | 7.95E-01 | 4.23E-01 | 7.77E-01 | 0.21  | 0.40  | 0.19  |
| A0A1D3JYX3 | 13 (3)  | 74.3  | 5.69E-01 | 8.23E+04 | 6.91E+04 | 8.35E+04 | 8.71E+04 | 7.24E+04 | 8.41E+04 | 6.42E+04 | 6.78E+04 | 9.86E-01 | 6.75E-01 | 5.84E-01 | 0.02     | -0.12 | -0.14 |       |
| A0A1D3JYX6 | 2 (1)   | 17.6  | 4.87E-01 | 9.43E+04 | 6.12E+04 | 7.68E+04 | 8.77E+04 | 9.12E+04 | 7.35E+04 | 7.55E+04 | 7.61E+04 | 6.48E+04 | 7.67E-01 | 8.45E-01 | 4.59E-01 | 0.12  | -0.10 | -0.22 |
| A0A1D3JYY5 | 39 (9)  | 103.6 | NA       | NA    | NA    | NA    |
| A0A1D3JYZ2 | 2 (1)   | 11.0  | 1.51E-02 | 2.14E+05 | 1.73E+05 | 2.01E+05 | 3.40E+05 | 3.55E+05 | 3.20E+05 | 6.39E+05 | 3.97E+05 | 4.03E+05 | 1.61E-01 | 1.24E-02 | 1.63E-01 | 0.79  | 1.29  | 0.50  |
| A0A1D3JYZ4 | 8 (1)   | 89.5  | 6.65E-01 | 0.00E+00 | 1.06E+04 | 1.18E+04 | 7.21E+03 | 8.63E+03 | 7.21E+03 | 1.09E+04 | 1.02E+04 | 9.22E+03 | 9.98E-01 | 6.94E-01 | 7.31E-01 | 0.04  | 0.43  | 0.39  |
| A0A1D3JYZ7 | 15 (7)  | 75.3  | 5.22E-02 | 1.55E+05 | 1.28E+05 | 1.36E+05 | 1.68E+05 | 1.73E+05 | 1.43E+05 | 1.99E+05 | 1.62E+05 | 1.85E+05 | 3.03E-01 | 4.42E-02 | 3.41E-01 | 0.21  | 0.38  | 0.17  |
| A0A1D3JYZ8 | 21 (4)  | 67.8  | NA       | NA    | NA    | NA    |
| A0A1D3JZ06 | 5 (1)   | 30.0  | 2.86E-03 | 4.91E+04 | 4.09E+04 | 4.56E+04 | 7.42E+04 | 7.35E+04 | 7.04E+04 | 5.41E+04 | 6.81E+04 | 7.02E+04 | 2.58E-03 | 1.58E-02 | 2.38E-01 | 0.69  | 0.51  | -0.18 |
| A0A1D3JZ09 | 2 (0)   | 10.7  | NA       | NA    | NA    | NA    |
| A0A1D3JZ13 | 4 (1)   | 18.9  | 4.22E-01 | 7.51E+03 | 8.40E+03 | 7.13E+03 | 5.43E+03 | 4.85E+03 | 7.78E+03 | 5.08E+03 | 7.80E+03 | 8.88E+03 | 4.16E-01 | 9.36E-01 | 5.96E-01 | -0.35 | -0.08 | 0.27  |
| A0A1D3JZ21 | 4 (1)   | 46.2  | 3.42E-01 | 9.33E+04 | 1.09E+05 | 1.37E+05 | 1.17E+05 | 1.25E+05 | 1.22E+05 | 9.68E+04 | 1.15E+05 | 9.38E+04 | 7.87E-01 | 6.45E-01 | 3.16E-01 | 0.10  | -0.15 | -0.25 |
| A0A1D3JZ23 | 14 (5)  | 84.1  | 4.08E-02 | 4.48E+04 | 4.93E+04 | 5.06E+04 | 8.67E+04 | 8.13E+04 | 1.17E+05 | 5.35E+04 | 9.33E+04 | 9.22E+04 | 3.70E-02 | 1.44E-01 | 5.56E-01 | 0.98  | 0.72  | -0.25 |
| A0A1D3JZ40 | 3 (1)   | 21.2  | 2.57E-01 | 2.56E+01 | 0.00E+00 | 7.60E+01 | 8.49E+01 | 3.45E+02 | 5.99E+02 | 0.00E+00 | 9.98E+01 | 4.57E+02 | 2.32E-01 | 6.55E-01 | 6.35E-01 | 3.34  | 2.45  | -0.89 |
| A0A1D3JZ43 | 17 (1)  | 5.0   | NA       | NA    | NA    | NA    |
| A0A1D3JZ60 | 4 (1)   | 25.1  | 5.11E-01 | 2.27E+03 | 1.41E+03 | 1.77E+03 | 3.08E+03 | 3.26E+03 | 4.69E+03 | 8.08E+01 | 3.62E+03 | 7.07E+03 | 5.55E-01 | 5.83E-01 | 9.99E-01 | 1.02  | 0.98  | -0.03 |
| A0A1D3JZ66 | 7 (0)   | 40.5  | NA       | NA    | NA    | NA    |
| A0A1D3JZ78 | 2 (0)   | 10.8  | NA       | NA    | NA    | NA    |
| A0A1D3JZ92 | 2 (1)   | 49.5  | NA       | NA    | NA    | NA    |
| A0A1D3JZA0 | 6 (1)   | 26.6  | 7.36E-03 | 5.78E+01 | 0.00E+00 | 2.20E+02 | 2.24E+02 | 4.62E+01 | 1.22E+02 | 7.31E+03 | 4.19E+03 | 1.16E+04 | 1.00E+00 | 1.17E-02 | 1.20E-02 | 0.50  | 6.38  | 5.88  |
| A0A1D3JZE2 | 31 (13) | 257.0 | 3.07E-02 | 8.05E+05 | 7.63E+05 | 7.61E+05 | 9.75E+05 | 9.14E+05 | 4.41E+05 | 4.14E+06 | 2.11E+06 | 1.83E+06 | 1.00E+00 | 4.56E-02 | 4.57E-02 | 0.00  | 1.79  | 1.79  |
| A0A1D3JZG0 | 2 (1)   | 38.9  | NA       | NA    | NA    | NA    |
| A0A1D3JZG1 | 9 (1)   | 58.5  | NA       | NA    | NA    | NA    |
| A0A1D3JZI1 | 4 (1)   | 84.2  | NA       | NA    | NA    | NA    |
| A0A1D3JZI9 | 6 (0)   | 36.5  | NA       | NA    | NA    | NA    |
| A0A1D3JZJ4 | 5 (1)   | 24.7  | 1.94E-01 | 3.84E+03 | 4.04E+03 | 4.88E+03 | 7.78E+03 | 7.71E+03 | 9.02E+03 | 3.02E+03 | 1.09E+04 | 6.58E+03 | 1.80E-01 | 4.20E-01 | 7.70E-01 | 0.94  | 0.68  | -0.26 |
| A0A1D3JZL5 | 8 (1)   | 55.7  | 1.23E-01 | 1.03E+05 | 7.47E+04 | 9.20E+04 | 8.02E+04 | 9.97E+04 | 6.38E+04 | 1.31E+05 | 9.89E+04 | 1.09E+05 | 7.93E-01 | 2.72E-01 | 1.18E-01 | -0.15 | 0.33  | 0.48  |
| A0A1D3JZN3 | 4 (2)   | 27.7  | 9.07E-01 | 8.98E+04 | 7.62E+04 | 9.08E+04 | 9.43E+04 | 1.03E+05 | 7.14E+04 | 1.02E+05 | 8.59E+04 | 8.00E+04 | 9.17E-01 | 9.29E-01 | 9.99E-01 | 0.07  | 0.06  | -0.01 |
| A0A1D3JZN4 | 2 (0)   | 10.4  | NA       | NA    | NA    | NA    |
| A0A1D3JZR0 | 8 (1)   | 44.3  | 9.82E-01 | 8.16E+03 | 7.05E+03 | 8.47E+03 | 8.17E+03 | 9.61E+03 | 5.64E+03 | 1.03E+04 | 7.45E+03 | 6.42E+03 | 9.98E-01 | 9.91E-01 | 9.81E-01 | -0.02 | 0.03  | 0.05  |
| A0A1D3JZS8 | 9 (1)   | 45.7  | NA       | NA    | NA    | NA    |
| A0A1D3JZT1 | 6 (1)   | 56.3  | NA       | NA    | NA    | NA    |

|            |         |       |          |          |          |          |          |          |          |          |          |          |          |          |          |       |       |       |
|------------|---------|-------|----------|----------|----------|----------|----------|----------|----------|----------|----------|----------|----------|----------|----------|-------|-------|-------|
| A0A1D3JZT7 | 12 (3)  | 65.8  | 1.42E-02 | 1.55E+04 | 1.34E+04 | 1.04E+04 | 1.58E+04 | 1.36E+04 | 1.65E+04 | 2.00E+04 | 2.15E+04 | 1.82E+04 | 4.10E-01 | 1.28E-02 | 6.37E-02 | 0.22  | 0.60  | 0.38  |
| A0A1D3JZV6 | 42 (5)  | 67.4  | NA       | NA    | NA    | NA    |
| A0A1D3JZV9 | 4 (0)   | 18.1  | NA       | NA    | NA    | NA    |
| A0A1D3JZX4 | 34 (5)  | 56.8  | NA       | NA    | NA    | NA    |
| A0A1D3JZX8 | 4 (0)   | 13.5  | NA       | NA    | NA    | NA    |
| A0A1D3JZZ0 | 9 (1)   | 45.0  | 6.11E-02 | 1.09E+04 | 2.39E+04 | 2.11E+04 | 1.56E+04 | 1.38E+04 | 2.20E+04 | 2.69E+04 | 3.16E+04 | 2.67E+04 | 9.28E-01 | 1.12E-01 | 7.00E-02 | -0.12 | 0.61  | 0.73  |
| A0A1D3JZZ6 | 11 (3)  | 73.7  | 5.32E-03 | 5.66E+04 | 5.64E+04 | 3.56E+04 | 6.63E+04 | 7.47E+04 | 9.88E+04 | 2.71E+04 | 3.07E+04 | 2.47E+04 | 4.95E-02 | 1.45E-01 | 4.39E-03 | 0.69  | -0.85 | -1.54 |
| A0A1D3K008 | 22 (3)  | 67.4  | NA       | NA    | NA    | NA    |
| A0A1D3K015 | 13 (2)  | 59.4  | NA       | NA    | NA    | NA    |
| A0A1D3K049 | 10 (2)  | 63.7  | 1.40E-03 | 1.03E+04 | 5.89E+03 | 5.23E+03 | 1.92E+04 | 1.74E+04 | 1.65E+04 | 1.14E+04 | 1.34E+04 | 1.26E+04 | 1.11E-03 | 2.96E-02 | 3.35E-02 | 1.31  | 0.81  | -0.50 |
| A0A1D3K060 | 15 (2)  | 106.4 | 1.20E-01 | 1.56E+04 | 2.09E+04 | 1.66E+04 | 1.24E+04 | 1.29E+04 | 2.26E+04 | 1.12E+04 | 1.01E+04 | 1.02E+04 | 8.37E-01 | 1.19E-01 | 2.47E-01 | -0.15 | -0.75 | -0.60 |
| A0A1D3K076 | 10 (2)  | 59.8  | 1.77E-03 | 2.32E+03 | 2.37E+03 | 2.07E+03 | 1.94E+03 | 1.90E+03 | 2.38E+03 | 8.44E+02 | 1.35E+03 | 1.10E+03 | 6.41E-01 | 2.09E-03 | 4.87E-03 | -0.12 | -1.04 | -0.92 |
| A0A1D3K077 | 9 (4)   | 57.9  | 1.01E-01 | 7.82E+05 | 7.39E+05 | 8.52E+05 | 7.16E+05 | 7.43E+05 | 6.53E+05 | 7.20E+05 | 7.11E+05 | 6.19E+05 | 1.93E-01 | 1.05E-01 | 8.86E-01 | -0.17 | -0.21 | -0.04 |
| A0A1D3K079 | 5 (1)   | 33.4  | 8.44E-03 | 1.86E+02 | 1.11E+03 | 9.05E+02 | 1.41E+03 | 1.32E+03 | 1.34E+03 | 3.84E+03 | 2.82E+03 | 5.82E+03 | 7.01E-01 | 9.29E-03 | 2.30E-02 | 0.89  | 2.50  | 1.62  |
| A0A1D3K096 | 20 (5)  | 53.7  | NA       | NA    | NA    | NA    |
| A0A1D3K097 | 5 (3)   | 34.4  | 8.43E-02 | 3.14E+04 | 3.57E+04 | 2.55E+04 | 2.60E+04 | 4.02E+04 | 3.69E+04 | 2.05E+04 | 2.67E+04 | 1.70E+04 | 7.63E-01 | 2.03E-01 | 8.15E-02 | 0.15  | -0.53 | -0.68 |
| A0A1D3K0A2 | 8 (2)   | 63.8  | 1.21E-01 | 3.81E+05 | 3.39E+05 | 3.90E+05 | 3.42E+05 | 3.44E+05 | 4.51E+05 | 3.02E+05 | 3.05E+05 | 3.11E+05 | 9.60E-01 | 1.95E-01 | 1.38E-01 | 0.03  | -0.27 | -0.31 |
| A0A1D3K0A7 | 3 (0)   | 20.3  | NA       | NA    | NA    | NA    |
| A0A1D3K0C0 | 2 (0)   | 10.3  | NA       | NA    | NA    | NA    |
| A0A1D3K0C8 | 10 (3)  | 58.6  | NA       | NA    | NA    | NA    |
| A0A1D3K0D4 | 2 (0)   | 10.1  | NA       | NA    | NA    | NA    |
| A0A1D3K0E9 | 21 (3)  | 112.8 | 4.45E-01 | 1.21E+05 | 1.12E+05 | 1.21E+05 | 1.14E+05 | 1.29E+05 | 1.00E+05 | 1.40E+05 | 1.26E+05 | 1.14E+05 | 9.31E-01 | 6.27E-01 | 4.36E-01 | -0.04 | 0.11  | 0.15  |
| A0A1D3K0F0 | 3 (1)   | 23.6  | 6.28E-01 | 8.79E+03 | 5.48E+03 | 6.71E+03 | 8.38E+03 | 9.58E+03 | 5.62E+03 | 8.76E+03 | 8.11E+03 | 7.82E+03 | 7.81E-01 | 6.16E-01 | 9.54E-01 | 0.17  | 0.23  | 0.07  |
| A0A1D3K0G0 | 2 (0)   | 10.6  | NA       | NA    | NA    | NA    |
| A0A1D3K0I8 | 3 (1)   | 15.8  | 5.49E-01 | 4.51E+04 | 2.92E+04 | 3.18E+04 | 3.41E+04 | 4.14E+04 | 2.51E+04 | 5.80E+04 | 3.55E+04 | 3.45E+04 | 9.75E-01 | 6.76E-01 | 5.55E-01 | -0.08 | 0.27  | 0.35  |
| A0A1D3K0K8 | 4 (0)   | 18.4  | NA       | NA    | NA    | NA    |
| A0A1D3K0L5 | 16 (9)  | 75.1  | 1.68E-02 | 1.48E+05 | 1.58E+05 | 1.66E+05 | 1.46E+05 | 1.53E+05 | 1.44E+05 | 1.23E+05 | 1.36E+05 | 1.38E+05 | 3.33E-01 | 1.45E-02 | 9.26E-02 | -0.09 | -0.25 | -0.16 |
| A0A1D3K0M4 | 3 (1)   | 17.5  | 1.13E-01 | 5.89E+03 | 5.67E+03 | 6.72E+03 | 5.09E+03 | 5.20E+03 | 3.94E+03 | 5.72E+03 | 2.59E+03 | 1.44E+03 | 4.93E-01 | 9.81E-02 | 4.33E-01 | -0.36 | -0.91 | -0.54 |
| A0A1D3K0N5 | 9 (2)   | 45.8  | NA       | NA    | NA    | NA    |
| A0A1D3K0N9 | 2 (0)   | 10.9  | NA       | NA    | NA    | NA    |
| A0A1D3K0P5 | 16 (6)  | 115.1 | 1.15E-01 | 1.50E+05 | 1.96E+05 | 1.97E+05 | 3.01E+05 | 2.80E+05 | 3.36E+05 | 1.35E+05 | 2.71E+05 | 3.24E+05 | 1.00E-01 | 4.67E-01 | 4.65E-01 | 0.76  | 0.43  | -0.33 |
| A0A1D3K0P6 | 19 (6)  | 58.7  | NA       | NA    | NA    | NA    |
| A0A1D3K0Q4 | 18 (11) | 128.0 | 5.96E-03 | 1.60E+05 | 1.52E+05 | 1.58E+05 | 3.00E+05 | 3.00E+05 | 3.70E+05 | 2.49E+05 | 2.89E+05 | 3.70E+05 | 7.36E-03 | 1.37E-02 | 8.30E-01 | 1.04  | 0.95  | -0.09 |
| A0A1D3K0Q5 | 2 (0)   | 10.4  | NA       | NA    | NA    | NA    |
| A0A1D3K0Q8 | 2 (0)   | 15.7  | NA       | NA    | NA    | NA    |
| A0A1D3K0Q9 | 3 (1)   | 16.2  | 5.52E-03 | 9.86E+01 | 8.99E+01 | 8.11E+01 | 2.03E+02 | 2.41E+02 | 2.90E+02 | 2.08E+02 | 1.94E+02 | 2.90E+02 | 7.35E-03 | 1.14E-02 | 9.07E-01 | 1.63  | 1.13  | -0.49 |
| A0A1D3K0S4 | 6 (2)   | 58.6  | NA       | NA    | NA    | NA    |
| A0A1D3K0T2 | 4 (1)   | 69.5  | NA       | NA    | NA    | NA    |
| A0A1D3K0T9 | 2 (1)   | 10.4  | 4.73E-02 | 4.04E+03 | 1.82E+03 | 2.99E+03 | 6.48E+03 | 6.50E+03 | 3.77E+03 | 3.25E+03 | 1.89E+03 | 3.10E+03 | 7.85E-02 | 9.76E-01 | 6.03E-02 | 0.92  | -0.10 | -1.02 |
| A0A1D3K0V2 | 4 (2)   | 17.9  | 7.10E-02 | 6.85E+04 | 8.61E+04 | 8.71E+04 | 7.00E+04 | 7.34E+04 | 6.49E+04 | 8.01E+04 | 8.91E+04 | 9.11E+04 | 2.35E-01 | 5.86E-01 | 6.35E-02 | -0.21 | 0.11  | 0.32  |
| A0A1D3K0W5 | 2 (0)   | 6.0   | NA       | NA    | NA    | NA    |
| A0A1D3K0Y3 | 2 (1)   | 11.3  | 7.80E-01 | 1.40E+04 | 6.03E+03 | 7.28E+03 | 7.28E+03 | 8.90E+03 | 4.39E+03 | 1.86E+04 | 3.00E+03 | 8.11E+03 | 8.70E-01 | 9.81E-01 | 7.75E-01 | -0.41 | 0.12  | 0.53  |
| A0A1D3K0Y4 | 7 (1)   | 57.5  | 5.08E-02 | 1.84E+03 | 1.63E+03 | 1.47E+03 | 3.09E+03 | 2.21E+03 | 4.90E+03 | 7.33E+02 | 1.89E+03 | 1.25E+03 | 1.05E-01 | 8.71E-01 | 5.55E-02 | 1.04  | -0.35 | -1.40 |
| A0A1D3K0Y9 | 3 (1)   | 17.1  | 5.80E-01 | 2.00E+01 | 6.47E+02 | 7.78E+01 | 7.83E+02 | 2.59E+02 | 3.90E+03 | 0.00E+00 | 5.21E+02 | 4.37E+03 | 6.30E-01 | 6.36E-01 | 1.00E+00 | 2.73  | 2.72  | -0.01 |
| A0A1D3K0Z6 | 3 (1)   | 17.2  | 1.17E-01 | 2.22E+04 | 2.18E+04 | 2.44E+04 | 2.69E+04 | 2.59E+04 | 3.16E+04 | 2.36E+04 | 2.78E+04 | 2.12E+04 | 1.14E-01 | 8.10E-01 | 2.53E-01 | 0.30  | 0.09  | -0.22 |
| A0A1D3K106 | 2 (0)   | 9.2   | NA       | NA    | NA    | NA    |
| A0A1D3K109 | 7 (1)   | 43.7  | 5.79E-03 | 4.46E+04 | 4.27E+04 | 4.47E+04 | 6.64E+04 | 6.11E+04 | 6.65E+04 | 3.22E+04 | 4.94E+04 | 4.72E+04 | 1.06E-02 | 9.73E-01 | 8.41E-03 | 0.56  | -0.03 | -0.59 |
| A0A1D3K115 | 8 (2)   | 61.6  | NA       | NA    | NA    | NA    |
| A0A1D3K116 | 14 (5)  | 100.7 | 7.81E-01 | 1.98E+04 | 1.98E+04 | 2.67E+04 | 2.32E+04 | 1.97E+04 | 2.07E+04 | 2.56E+04 | 3.52E+04 | 1.40E+04 | 9.85E-01 | 8.64E-01 | 7.79E-01 | -0.06 | 0.17  | 0.23  |
| A0A1D3K117 | 7 (5)   | 54.3  | 1.34E-02 | 2.13E+05 | 1.46E+05 | 1.93E+05 | 1.91E+05 | 2.34E+05 | 1.89E+05 | 3.18E+05 | 2.52E+05 | 3.15E+05 | 7.40E-01 | 1.46E-02 | 3.49E-02 | 0.15  | 0.68  | 0.53  |
| A0A1D3K119 | 8 (3)   | 57.2  | 3.41E-01 | 5.70E+03 | 1.68E+04 | 8.47E+03 | 1.46E+04 | 1.17E+04 | 3.22E+04 | 1.03E+04 | 2.50E+04 | 3.26E+04 | 5.18E-01 | 3.36E-01 | 9.20E-01 | 0.92  | 1.13  | 0.21  |
| A0A1D3K120 | 15 (3)  | 98.2  | 4.10E-02 | 5.81E+05 | 4.90E+05 | 5.55E+05 | 4.23E+05 | 4.43E+05 | 3.96E+05 | 4.85E+05 | 3.54E+05 | 3.14E+05 | 1.05E-01 | 4.13E-02 | 7.48E-01 | -0.36 | -0.49 | -0.13 |

|            |         |       |          |          |          |          |          |          |          |          |          |          |          |          |          |       |       |       |
|------------|---------|-------|----------|----------|----------|----------|----------|----------|----------|----------|----------|----------|----------|----------|----------|-------|-------|-------|
| A0A1D3K125 | 21 (1)  | 155.6 | 7.70E-01 | 3.41E+04 | 2.39E+04 | 2.72E+04 | 2.74E+04 | 3.50E+04 | 2.65E+04 | 4.97E+04 | 1.24E+04 | 4.38E+04 | 9.91E-01 | 7.76E-01 | 8.42E-01 | 0.06  | 0.32  | 0.25  |
| A0A1D3K127 | 2 (0)   | 11.3  | NA       | NA    | NA    | NA    |
| A0A1D3K130 | 10 (2)  | 67.4  | 2.66E-01 | 2.05E+04 | 1.23E+04 | 1.73E+04 | 1.84E+04 | 1.86E+04 | 1.20E+04 | 2.45E+04 | 1.56E+04 | 3.01E+04 | 9.97E-01 | 3.39E-01 | 3.10E-01 | -0.03 | 0.49  | 0.52  |
| A0A1D3K133 | 25 (8)  | 161.4 | 6.39E-01 | 8.50E+05 | 6.99E+05 | 7.99E+05 | 7.00E+05 | 7.77E+05 | 6.46E+05 | 8.97E+05 | 6.90E+05 | 6.62E+05 | 6.15E-01 | 9.05E-01 | 8.50E-01 | -0.15 | -0.06 | 0.08  |
| A0A1D3K135 | 19 (4)  | 133.7 | 5.44E-03 | 3.26E+05 | 3.44E+05 | 3.32E+05 | 2.25E+05 | 2.16E+05 | 2.63E+05 | 2.33E+05 | 2.29E+05 | 1.48E+05 | 1.96E-02 | 5.44E-03 | 4.84E-01 | -0.51 | -0.72 | -0.21 |
| A0A1D3K138 | 8 (0)   | 46.5  | NA       | NA    | NA    | NA    |
| A0A1D3K160 | 2 (1)   | 17.2  | 4.34E-01 | 2.06E+03 | 1.61E+03 | 3.51E+04 | 1.50E+03 | 2.54E+03 | 1.04E+03 | 3.13E+03 | 1.70E+03 | 2.35E+03 | 4.76E-01 | 5.16E-01 | 9.97E-01 | -2.93 | -2.43 | 0.50  |
| A0A1D3K167 | 8 (1)   | 42.7  | 2.74E-03 | 2.90E+03 | 3.78E+03 | 3.95E+03 | 1.76E+03 | 1.58E+03 | 2.18E+03 | 1.74E+03 | 1.23E+03 | 6.48E+02 | 1.22E-02 | 2.62E-03 | 3.24E-01 | -0.95 | -1.55 | -0.60 |
| A0A1D3K174 | 2 (0)   | 11.9  | NA       | NA    | NA    | NA    |
| A0A1D3K181 | 5 (1)   | 58.5  | 6.53E-05 | 6.70E+03 | 7.02E+03 | 6.47E+03 | 7.12E+03 | 7.48E+03 | 8.55E+03 | 1.24E+04 | 1.35E+04 | 1.19E+04 | 2.23E-01 | 7.59E-05 | 2.17E-04 | 0.20  | 0.91  | 0.71  |
| A0A1D3K184 | 23 (7)  | 207.4 | 1.52E-02 | 1.02E+06 | 8.85E+05 | 1.13E+06 | 5.70E+05 | 6.16E+05 | 4.88E+05 | 8.04E+05 | 7.48E+05 | 4.52E+05 | 1.51E-02 | 4.83E-02 | 6.06E-01 | -0.86 | -0.60 | 0.26  |
| A0A1D3K197 | 52 (16) | 408.3 | 1.94E-02 | 1.38E+06 | 1.20E+06 | 1.35E+06 | 1.08E+06 | 1.09E+06 | 1.01E+06 | 1.12E+06 | 1.01E+06 | 8.52E+05 | 5.14E-02 | 2.04E-02 | 7.29E-01 | -0.31 | -0.40 | -0.09 |
| A0A1D3K1A4 | 44 (12) | 228.1 | 2.67E-01 | 3.56E+05 | 3.04E+05 | 3.44E+05 | 2.97E+05 | 3.25E+05 | 2.65E+05 | 3.35E+05 | 3.00E+05 | 2.90E+05 | 2.53E-01 | 4.88E-01 | 8.41E-01 | -0.18 | -0.12 | 0.06  |
| A0A1D3K1B1 | 3 (1)   | 17.1  | 2.22E-02 | 2.50E+04 | 1.97E+04 | 2.54E+04 | 3.29E+04 | 3.66E+04 | 2.93E+04 | 3.60E+04 | 4.96E+04 | 6.29E+04 | 3.91E-01 | 1.93E-02 | 1.08E-01 | 0.49  | 1.08  | 0.59  |
| A0A1D3K1B4 | 17 (6)  | 103.1 | 1.60E-02 | 1.20E+05 | 1.17E+05 | 1.27E+05 | 1.51E+05 | 1.47E+05 | 1.73E+05 | 1.60E+05 | 2.20E+05 | 1.84E+05 | 1.36E-01 | 1.32E-02 | 2.08E-01 | 0.38  | 0.63  | 0.26  |
| A0A1D3K1B5 | 3 (0)   | 10.9  | NA       | NA    | NA    | NA    |
| A0A1D3K1D3 | 6 (3)   | 48.8  | 7.43E-01 | 2.75E+04 | 5.56E+04 | 4.18E+04 | 4.57E+04 | 3.63E+04 | 8.86E+04 | 1.49E+04 | 5.89E+04 | 6.58E+04 | 7.31E-01 | 9.67E-01 | 8.62E-01 | 0.45  | 0.16  | -0.29 |
| A0A1D3K1E0 | 2 (1)   | 10.9  | 2.70E-02 | 3.49E+04 | 3.45E+04 | 3.92E+04 | 3.47E+04 | 3.48E+04 | 3.76E+04 | 5.08E+04 | 4.88E+04 | 3.95E+04 | 9.87E-01 | 4.48E-02 | 3.70E-02 | -0.02 | 0.36  | 0.38  |
| A0A1D3K1E4 | 15 (3)  | 136.3 | 7.72E-01 | 3.05E+05 | 1.69E+05 | 1.32E+05 | 1.73E+05 | 1.78E+05 | 1.60E+05 | 1.65E+05 | 1.67E+05 | 2.08E+05 | 7.62E-01 | 8.76E-01 | 9.73E-01 | -0.25 | -0.17 | 0.08  |
| A0A1D3K1E8 | 9 (1)   | 51.7  | NA       | NA    | NA    | NA    |
| A0A1D3K1F0 | 6 (1)   | 36.4  | 2.82E-01 | 3.08E+03 | 1.42E+03 | 2.61E+03 | 3.00E+03 | 3.74E+03 | 3.78E+03 | 1.05E+04 | 0.00E+00 | 1.42E+04 | 9.44E-01 | 2.89E-01 | 4.22E-01 | 0.57  | 1.80  | 1.23  |
| A0A1D3K1G9 | 28 (5)  | 67.4  | NA       | NA    | NA    | NA    |
| A0A1D3K1I0 | 7 (1)   | 39.0  | 5.86E-01 | 5.70E+01 | 7.04E+03 | 3.35E+01 | 9.04E+01 | 2.94E+01 | 3.14E+03 | 0.00E+00 | 0.00E+00 | 4.02E+02 | 8.15E-01 | 5.61E-01 | 8.93E-01 | -1.13 | -4.15 | -3.02 |
| A0A1D3K1J8 | 12 (4)  | 48.3  | NA       | NA    | NA    | NA    |
| A0A1D3K1J2 | 2 (0)   | 9.7   | NA       | NA    | NA    | NA    |
| A0A1D3K1J5 | 11 (6)  | 87.5  | 1.61E-01 | 3.58E+05 | 2.95E+05 | 3.33E+05 | 2.73E+05 | 2.91E+05 | 2.26E+05 | 4.52E+05 | 3.06E+05 | 3.20E+05 | 3.57E-01 | 7.75E-01 | 1.51E-01 | -0.32 | 0.13  | 0.45  |
| A0A1D3K1K2 | 7 (2)   | 49.3  | 8.06E-02 | 6.57E+04 | 6.72E+04 | 6.45E+04 | 4.35E+04 | 4.66E+04 | 6.16E+04 | 5.61E+04 | 6.00E+04 | 4.63E+04 | 8.08E-02 | 1.79E-01 | 8.12E-01 | -0.38 | -0.28 | 0.10  |
| A0A1D3K1K6 | 9 (3)   | 79.4  | 8.16E-02 | 1.92E+05 | 1.80E+05 | 2.01E+05 | 1.58E+05 | 1.76E+05 | 1.72E+05 | 1.89E+05 | 1.74E+05 | 1.74E+05 | 7.03E-02 | 3.45E-01 | 4.60E-01 | -0.18 | -0.09 | 0.08  |
| A0A1D3K1L8 | 3 (1)   | 56.3  | NA       | NA    | NA    | NA    |
| A0A1D3K1P0 | 4 (1)   | 20.7  | 3.01E-02 | 1.18E+03 | 1.34E+03 | 3.85E+02 | 6.19E+00 | 5.14E-01 | 1.66E-01 | 5.39E+02 | 2.70E-01 | 0.00E+00 | 3.25E-02 | 7.03E-02 | 8.10E-01 | -8.72 | -2.43 | 6.29  |
| A0A1D3K1Q3 | 2 (1)   | 9.6   | 5.42E-04 | 1.43E+03 | 2.08E+03 | 1.78E+03 | 9.00E+02 | 7.39E+02 | 1.12E+03 | 6.59E+01 | 3.62E+02 | 7.65E+01 | 1.14E-02 | 4.30E-04 | 1.95E-02 | -0.94 | -3.39 | -2.45 |
| A0A1D3K1R8 | 2 (1)   | 10.8  | 3.19E-02 | 1.20E+04 | 1.55E+04 | 1.48E+04 | 1.37E+04 | 1.33E+04 | 1.71E+04 | 5.24E+03 | 9.75E+03 | 1.07E+04 | 9.45E-01 | 5.86E-02 | 3.95E-02 | 0.06  | -0.72 | -0.78 |
| A0A1D3K1T5 | 3 (1)   | 20.4  | 2.90E-02 | 2.74E+04 | 2.62E+04 | 3.23E+04 | 5.07E+04 | 5.10E+04 | 4.60E+04 | 6.03E+04 | 5.26E+04 | 3.49E+04 | 4.34E-02 | 4.31E-02 | 1.00E+00 | 0.78  | 0.78  | 0.00  |
| A0A1D3K1U5 | 26 (6)  | 167.6 | 4.24E-04 | 3.75E+04 | 3.13E+04 | 3.10E+04 | 3.68E+04 | 4.09E+04 | 2.88E+04 | 6.34E+04 | 7.82E+04 | 7.76E+04 | 9.05E-01 | 6.39E-04 | 8.75E-04 | 0.09  | 1.13  | 1.04  |
| A0A1D3K1V3 | 6 (1)   | 37.3  | 8.80E-05 | 3.91E+04 | 3.60E+04 | 4.50E+04 | 1.00E+05 | 1.04E+05 | 8.99E+04 | 5.96E+04 | 6.93E+04 | 7.19E+04 | 6.94E-05 | 4.57E-03 | 2.18E-03 | 1.29  | 0.74  | -0.55 |
| A0A1D3K1V5 | 7 (1)   | 63.9  | 4.42E-04 | 2.67E+04 | 2.51E+04 | 2.44E+04 | 3.58E+04 | 3.24E+04 | 3.74E+04 | 4.33E+04 | 5.07E+04 | 4.33E+04 | 1.50E-02 | 3.49E-04 | 1.05E-02 | 0.47  | 0.85  | 0.38  |
| A0A1D3K1V7 | 7 (1)   | 62.6  | 2.70E-02 | 6.02E+04 | 7.19E+04 | 6.78E+04 | 1.15E+05 | 1.17E+05 | 1.39E+05 | 9.77E+04 | 1.61E+05 | 1.85E+05 | 9.55E-02 | 2.50E-02 | 5.52E-01 | 0.89  | 1.15  | 0.26  |
| A0A1D3K1V9 | 10 (1)  | 64.7  | 3.79E-01 | 1.95E+03 | 3.61E+03 | 3.60E+03 | 1.80E+03 | 1.95E+03 | 2.38E+03 | 9.64E+02 | 5.61E+03 | 5.79E+03 | 7.52E-01 | 7.30E-01 | 3.50E-01 | -0.58 | 0.43  | 1.01  |
| A0A1D3K1W1 | 4 (1)   | 45.0  | 1.15E-01 | 1.97E+03 | 5.24E+03 | 2.94E+03 | 8.56E+03 | 6.10E+03 | 1.81E+04 | 7.92E+02 | 5.93E+03 | 4.94E+03 | 1.40E-01 | 9.88E-01 | 1.70E-01 | 1.69  | 0.20  | -1.49 |
| A0A1D3K1Y7 | 44 (7)  | 218.7 | 7.90E-02 | 1.73E+07 | 1.35E+07 | 1.70E+07 | 1.11E+07 | 1.28E+07 | 9.64E+06 | 2.15E+07 | 1.87E+07 | 1.30E+07 | 1.99E-01 | 7.37E-01 | 7.55E-02 | -0.51 | 0.16  | 0.67  |
| A0A1D3K1Y8 | 10 (1)  | 55.3  | 1.07E-02 | 2.21E+03 | 1.46E+03 | 2.43E+03 | 1.45E+03 | 1.46E+03 | 1.06E+03 | 2.88E+03 | 3.26E+03 | 2.40E+03 | 1.60E-01 | 1.08E-01 | 8.76E-03 | -0.62 | 0.49  | 1.11  |
| A0A1D3K202 | 5 (0)   | 34.6  | NA       | NA    | NA    | NA    |
| A0A1D3K205 | 15 (5)  | 56.0  | NA       | NA    | NA    | NA    |
| A0A1D3K207 | 12 (3)  | 60.1  | 8.45E-02 | 3.19E+04 | 2.64E+04 | 3.35E+04 | 2.20E+04 | 2.26E+04 | 1.78E+04 | 3.17E+04 | 1.97E+04 | 2.67E+04 | 7.27E-02 | 4.48E-01 | 3.67E-01 | -0.56 | -0.23 | 0.32  |
| A0A1D3K218 | 39 (12) | 260.2 | 2.24E-03 | 3.05E+05 | 3.32E+05 | 3.12E+05 | 2.62E+05 | 2.68E+05 | 3.00E+05 | 2.30E+05 | 2.32E+05 | 1.93E+05 | 9.66E-02 | 1.85E-03 | 2.27E-02 | -0.19 | -0.53 | -0.34 |
| A0A1D3K222 | 13 (2)  | 71.6  | 2.03E-01 | 1.99E+05 | 1.78E+05 | 1.99E+05 | 1.74E+05 | 1.72E+05 | 1.67E+05 | 1.92E+05 | 1.69E+05 | 1.46E+05 | 2.81E-01 | 2.33E-01 | 9.87E-01 | -0.17 | -0.18 | -0.02 |
| A0A1D3K227 | 6 (3)   | 28.4  | NA       | NA    | NA    | NA    |
| A0A1D3K228 | 19 (6)  | 134.2 | 1.51E-01 | 4.53E+05 | 3.61E+05 | 4.01E+05 | 2.93E+05 | 3.24E+05 | 2.12E+05 | 3.96E+05 | 3.02E+05 | 1.86E+05 | 1.65E-01 | 2.43E-01 | 9.50E-01 | -0.55 | -0.46 | 0.09  |
| A0A1D3K241 | 2 (1)   | 13.7  | 1.38E-01 | 1.22E+05 | 1.14E+05 | 1.34E+05 | 1.04E+05 | 1.02E+05 | 9.29E+04 | 1.24E+05 | 9.53E+04 | 8.43E+04 | 1.67E-01 | 1.99E-01 | 9.89E-01 | -0.30 | -0.28 | 0.02  |
| A0A1D3K244 | 3 (2)   | 20.9  | 1.01E-01 | 2.89E+04 | 1.77E+04 | 2.11E+04 | 3.12E+04 | 3.64E+04 | 3.24E+04 | 4.48E+04 | 2.55E+04 | 3.89E+04 | 2.08E-01 | 1.03E-01 | 8.47E-01 | 0.56  | 0.69  | 0.13  |
| A0A1D3K251 | 2 (1)   | 10.9  | 3.62E-03 | 3.36E+04 | 2.83E+04 | 3.36E+04 | 7.00E+04 | 7.08E+04 | 6.73E+04 | 5.08E+04 | 6.00E+04 | 7.91E+04 | 4.18E-03 | 9.80E-03 | 6.82E-01 | 1.12  | 0.99  | -0.13 |
| A0A1D3K261 | 11 (2)  | 68.4  | 3.74E-01 | 6.96E+04 | 1.19E+05 | 6.43E+04 | 6.66E+04 | 7.70E+04 | 1.25E+05 | 3.18E+04 | 7.54E+04 | 6.33E+04 | 9.71E-01 | 5.01E-01 | 3.89E-01 | 0.09  | -0.57 | -0.66 |

|            |         |       |          |          |          |          |          |          |          |          |          |          |          |          |          |       |       |       |
|------------|---------|-------|----------|----------|----------|----------|----------|----------|----------|----------|----------|----------|----------|----------|----------|-------|-------|-------|
| AOA1D3K275 | 8 (2)   | 54.8  | 7.55E-01 | 3.36E+04 | 3.52E+04 | 4.37E+04 | 3.17E+04 | 2.99E+04 | 4.68E+04 | 3.04E+04 | 3.84E+04 | 3.14E+04 | 9.64E-01 | 7.41E-01 | 8.76E-01 | -0.06 | -0.17 | -0.11 |
| AOA1D3K278 | 21 (5)  | 69.4  | NA       | NA    | NA    | NA    |
| AOA1D3K280 | 18 (7)  | 118.7 | 1.45E-01 | 2.18E+05 | 2.46E+05 | 2.20E+05 | 2.49E+05 | 2.39E+05 | 3.20E+05 | 2.49E+05 | 3.13E+05 | 3.22E+05 | 3.83E-01 | 1.31E-01 | 6.77E-01 | 0.24  | 0.37  | 0.13  |
| AOA1D3K286 | 3 (0)   | 24.1  | NA       | NA    | NA    | NA    |
| AOA1D3K290 | 9 (3)   | 51.5  | NA       | NA    | NA    | NA    |
| AOA1D3K298 | 6 (1)   | 63.6  | NA       | NA    | NA    | NA    |
| AOA1D3K2A7 | 5 (0)   | 25.3  | NA       | NA    | NA    | NA    |
| AOA1D3K2A9 | 2 (1)   | 11.2  | 5.62E-03 | 4.74E+03 | 3.62E+03 | 4.31E+03 | 6.35E+03 | 5.19E+03 | 6.06E+03 | 6.49E+03 | 7.44E+03 | 6.29E+03 | 3.40E-02 | 4.90E-03 | 2.47E-01 | 0.47  | 0.67  | 0.20  |
| AOA1D3K2B2 | 8 (4)   | 61.6  | 2.76E-05 | 4.00E+05 | 4.09E+05 | 3.76E+05 | 2.90E+05 | 2.59E+05 | 2.96E+05 | 2.00E+05 | 2.21E+05 | 1.97E+05 | 4.23E-04 | 2.22E-05 | 3.51E-03 | -0.49 | -0.94 | -0.45 |
| AOA1D3K2B6 | 2 (0)   | 14.3  | NA       | NA    | NA    | NA    |
| AOA1D3K2B9 | 4 (1)   | 15.2  | 6.70E-01 | 2.36E+05 | 1.89E+05 | 2.19E+05 | 1.93E+05 | 2.24E+05 | 1.43E+05 | 2.74E+05 | 1.73E+05 | 1.90E+05 | 6.95E-01 | 9.97E-01 | 7.39E-01 | -0.20 | -0.02 | 0.19  |
| AOA1D3K2C5 | 6 (0)   | 44.4  | NA       | NA    | NA    | NA    |
| AOA1D3K2C8 | 8 (1)   | 64.7  | NA       | NA    | NA    | NA    |
| AOA1D3K2E2 | 2 (0)   | 17.8  | NA       | NA    | NA    | NA    |
| AOA1D3K2F0 | 2 (1)   | 29.2  | 5.48E-01 | 1.18E+05 | 3.41E+05 | 1.78E+05 | 1.91E+05 | 2.67E+05 | 5.07E+05 | 4.16E+04 | 3.48E+05 | 1.93E+05 | 6.50E-01 | 9.88E-01 | 5.67E-01 | 0.60  | -0.13 | -0.73 |
| AOA1D3K2F3 | 3 (1)   | 17.1  | 1.05E-01 | 3.88E+02 | 1.90E+03 | 1.33E+03 | 8.57E+01 | 1.29E+02 | 1.05E+03 | 0.00E+00 | 2.30E+02 | 0.00E+00 | 2.61E-01 | 9.81E-02 | 7.32E-01 | -1.52 | -3.97 | -2.46 |
| AOA1D3K2F5 | 10 (3)  | 45.9  | NA       | NA    | NA    | NA    |
| AOA1D3K2G0 | 12 (5)  | 99.4  | 3.71E-01 | 3.57E+05 | 2.18E+05 | 3.04E+05 | 4.62E+05 | 5.00E+05 | 3.88E+05 | 1.00E+06 | 2.06E+05 | 5.57E+05 | 7.09E-01 | 3.42E-01 | 7.62E-01 | 0.62  | 1.01  | 0.39  |
| AOA1D3K2G3 | 6 (1)   | 26.0  | 2.10E-03 | 1.76E+04 | 1.31E+04 | 1.87E+04 | 4.89E+03 | 5.57E+03 | 2.50E+03 | 9.29E+03 | 4.13E+03 | 7.13E+03 | 2.23E-03 | 7.17E-03 | 4.67E-01 | -1.93 | -1.27 | 0.66  |
| AOA1D3K2G8 | 6 (0)   | 33.4  | NA       | NA    | NA    | NA    |
| AOA1D3K2H4 | 15 (2)  | 56.8  | NA       | NA    | NA    | NA    |
| AOA1D3K2H8 | 11 (3)  | 64.6  | 9.83E-01 | 5.78E+04 | 5.49E+04 | 6.53E+04 | 5.30E+04 | 5.55E+04 | 6.76E+04 | 6.76E+04 | 5.51E+04 | 5.66E+04 | 9.93E-01 | 9.97E-01 | 9.81E-01 | -0.02 | 0.01  | 0.03  |
| AOA1D3K2I0 | 21 (5)  | 132.6 | 9.52E-01 | 2.35E+05 | 1.65E+05 | 1.99E+05 | 1.94E+05 | 2.26E+05 | 1.56E+05 | 2.57E+05 | 1.47E+05 | 2.02E+05 | 9.71E-01 | 9.98E-01 | 9.52E-01 | -0.06 | 0.02  | 0.08  |
| AOA1D3K2I2 | 8 (3)   | 42.6  | 4.15E-02 | 1.11E+05 | 8.66E+04 | 1.02E+05 | 8.88E+04 | 9.48E+04 | 6.35E+04 | 1.47E+05 | 1.06E+05 | 1.34E+05 | 4.67E-01 | 1.75E-01 | 3.63E-02 | -0.28 | 0.37  | 0.65  |
| AOA1D3K2I7 | 13 (6)  | 128.9 | 3.61E-02 | 2.12E+05 | 2.58E+05 | 2.53E+05 | 4.52E+05 | 4.35E+05 | 7.43E+05 | 2.66E+05 | 3.69E+05 | 3.90E+05 | 3.26E-02 | 5.28E-01 | 1.34E-01 | 1.17  | 0.50  | -0.67 |
| AOA1D3K2J8 | 5 (0)   | 30.8  | NA       | NA    | NA    | NA    |
| AOA1D3K2J9 | 7 (3)   | 44.0  | 1.13E-03 | 4.05E+04 | 3.95E+04 | 4.30E+04 | 3.08E+04 | 2.93E+04 | 3.32E+04 | 4.58E+04 | 4.38E+04 | 4.03E+04 | 3.70E-03 | 4.55E-01 | 1.24E-03 | -0.40 | 0.08  | 0.48  |
| AOA1D3K2K2 | 9 (1)   | 62.5  | NA       | NA    | NA    | NA    |
| AOA1D3K2K3 | 35 (10) | 203.0 | 1.98E-04 | 8.82E+04 | 7.98E+04 | 8.22E+04 | 9.75E+04 | 1.00E+05 | 9.12E+04 | 1.49E+05 | 1.28E+05 | 1.37E+05 | 1.44E-01 | 2.00E-04 | 8.91E-04 | 0.21  | 0.73  | 0.52  |
| AOA1D3K2K5 | 8 (4)   | 38.4  | 1.05E-01 | 7.49E+04 | 6.13E+04 | 6.88E+04 | 8.31E+04 | 8.90E+04 | 6.75E+04 | 9.50E+04 | 8.13E+04 | 8.32E+04 | 3.09E-01 | 9.41E-02 | 6.35E-01 | 0.22  | 0.34  | 0.12  |
| AOA1D3K2K7 | 11 (3)  | 54.4  | 1.55E-01 | 5.40E+04 | 5.30E+04 | 4.47E+04 | 6.06E+04 | 6.99E+04 | 4.29E+04 | 6.39E+04 | 9.28E+04 | 6.44E+04 | 7.75E-01 | 1.45E-01 | 3.45E-01 | 0.19  | 0.54  | 0.35  |
| AOA1D3K2L3 | 2 (0)   | 10.1  | NA       | NA    | NA    | NA    |
| AOA1D3K2L4 | 21 (6)  | 137.6 | 2.51E-01 | 4.43E+05 | 4.26E+05 | 5.27E+05 | 5.07E+05 | 5.68E+05 | 4.22E+05 | 6.82E+05 | 5.81E+05 | 4.81E+05 | 8.63E-01 | 2.42E-01 | 4.48E-01 | 0.10  | 0.32  | 0.22  |
| AOA1D3K2N2 | 6 (1)   | 30.7  | 1.69E-02 | 5.38E+03 | 6.20E+03 | 6.27E+03 | 5.58E+03 | 4.84E+03 | 4.85E+03 | 4.88E+03 | 3.81E+03 | 3.65E+03 | 2.06E-01 | 1.40E-02 | 1.47E-01 | -0.22 | -0.53 | -0.31 |
| AOA1D3K2P8 | 5 (0)   | 35.0  | NA       | NA    | NA    | NA    |
| AOA1D3K2Q8 | 12 (2)  | 63.6  | NA       | NA    | NA    | NA    |
| AOA1D3K2S6 | 8 (0)   | 57.3  | NA       | NA    | NA    | NA    |
| AOA1D3K2S7 | 12 (3)  | 69.0  | 3.48E-01 | 3.90E+02 | 6.02E+03 | 9.50E+02 | 3.76E+03 | 3.84E+03 | 2.96E+04 | 0.00E+00 | 2.20E+03 | 4.84E+03 | 4.13E-01 | 1.00E+00 | 4.06E-01 | 2.34  | -0.06 | -2.40 |
| AOA1D3K2S8 | 4 (2)   | 27.9  | 2.81E-01 | 7.12E+03 | 1.16E+04 | 9.73E+03 | 1.37E+04 | 1.13E+04 | 2.43E+04 | 7.17E+03 | 1.24E+04 | 1.58E+04 | 2.65E-01 | 8.39E-01 | 5.10E-01 | 0.79  | 0.31  | -0.48 |
| AOA1D3K2T8 | 5 (2)   | 20.1  | 7.43E-04 | 8.06E+04 | 5.94E+04 | 7.02E+04 | 1.37E+05 | 1.28E+05 | 1.25E+05 | 7.65E+04 | 8.62E+04 | 9.96E+04 | 6.90E-04 | 1.53E-01 | 4.17E-03 | 0.89  | 0.32  | -0.57 |
| AOA1D3K2T9 | 3 (1)   | 15.4  | 2.03E-01 | 7.95E+03 | 1.93E+03 | 1.50E+03 | 5.02E+02 | 7.48E+02 | 4.44E+02 | 2.00E+03 | 0.00E+00 | 1.04E+02 | 2.44E-01 | 2.68E-01 | 9.97E-01 | -2.75 | -2.44 | 0.31  |
| AOA1D3K2U2 | 26 (5)  | 201.3 | 3.73E-03 | 2.35E+05 | 2.16E+05 | 2.33E+05 | 2.29E+05 | 2.78E+05 | 1.82E+05 | 3.98E+05 | 3.41E+05 | 3.51E+05 | 9.98E-01 | 5.98E-03 | 6.37E-03 | 0.01  | 0.67  | 0.66  |
| AOA1D3K2U3 | 12 (5)  | 60.2  | 1.11E-01 | 4.44E+05 | 3.66E+05 | 4.11E+05 | 3.08E+05 | 3.29E+05 | 2.22E+05 | 4.18E+05 | 3.19E+05 | 2.75E+05 | 9.69E-02 | 3.72E-01 | 5.59E-01 | -0.51 | -0.27 | 0.24  |
| AOA1D3K2U4 | 7 (1)   | 41.4  | 1.12E-02 | 2.18E+04 | 2.04E+04 | 2.57E+04 | 1.36E+04 | 1.27E+04 | 1.69E+04 | 2.15E+04 | 2.70E+04 | 2.20E+04 | 2.27E-02 | 9.16E-01 | 1.44E-02 | -0.65 | 0.06  | 0.71  |
| AOA1D3K2U5 | 18 (1)  | 94.8  | 2.63E-01 | 1.02E+05 | 8.79E+04 | 1.05E+05 | 1.07E+05 | 1.10E+05 | 9.14E+04 | 1.22E+05 | 1.07E+05 | 1.06E+05 | 8.46E-01 | 2.50E-01 | 4.78E-01 | 0.06  | 0.19  | 0.13  |
| AOA1D3K2U9 | 15 (5)  | 81.0  | 9.55E-01 | 3.92E+05 | 3.01E+05 | 2.40E+05 | 0.00E+00 | 1.02E+06 | 0.00E+00 | 3.28E+05 | 3.31E+05 | 5.30E+05 | 9.95E-01 | 9.52E-01 | 9.78E-01 | 0.12  | 0.35  | 0.22  |
| AOA1D3K2V0 | 14 (6)  | 121.8 | 9.71E-01 | 2.12E+06 | 2.22E+06 | 3.28E+06 | 3.05E+06 | 3.25E+06 | 2.94E+06 | 0.00E+00 | 0.00E+00 | 9.21E+06 | 9.75E-01 | 9.76E-01 | 1.00E+00 | 0.28  | 0.27  | 0.00  |
| AOA1D3K2V5 | 24 (4)  | 151.5 | 7.54E-02 | 1.21E+05 | 1.42E+05 | 1.48E+05 | 1.74E+05 | 1.74E+05 | 2.23E+05 | 1.45E+05 | 1.90E+05 | 1.89E+05 | 7.14E-02 | 1.98E-01 | 7.15E-01 | 0.47  | 0.35  | -0.12 |
| AOA1D3K2V8 | 2 (0)   | 9.2   | NA       | NA    | NA    | NA    |
| AOA1D3K2W1 | 6 (0)   | 31.3  | NA       | NA    | NA    | NA    |
| AOA1D3K2W4 | 13 (4)  | 74.1  | 1.08E-01 | 4.01E+05 | 3.18E+05 | 3.86E+05 | 2.90E+05 | 3.15E+05 | 2.57E+05 | 3.55E+05 | 2.72E+05 | 2.65E+05 | 1.23E-01 | 1.78E-01 | 9.55E-01 | -0.36 | -0.31 | 0.05  |
| AOA1D3K2W7 | 23 (6)  | 136.3 | 1.70E-01 | 2.78E+05 | 2.30E+05 | 2.32E+05 | 1.79E+05 | 2.07E+05 | 1.54E+05 | 2.64E+05 | 1.84E+05 | 1.62E+05 | 1.56E-01 | 3.97E-01 | 7.38E-01 | -0.46 | -0.28 | 0.18  |

|            |         |       |          |          |          |          |          |          |          |          |          |          |          |          |          |       |       |       |
|------------|---------|-------|----------|----------|----------|----------|----------|----------|----------|----------|----------|----------|----------|----------|----------|-------|-------|-------|
| A0A1D3K2X0 | 4 (1)   | 21.6  | 8.56E-05 | 1.94E+04 | 1.76E+04 | 2.09E+04 | 7.48E+03 | 8.94E+03 | 6.06E+03 | 1.04E+04 | 9.68E+03 | 1.11E+04 | 8.51E-05 | 4.19E-04 | 7.99E-02 | -1.37 | -0.89 | 0.47  |
| A0A1D3K2X4 | 3 (0)   | 19.0  | NA       | NA    | NA    | NA    |
| A0A1D3K2Y0 | 3 (1)   | 15.6  | 2.82E-02 | 1.14E+05 | 1.14E+05 | 9.25E+04 | 1.23E+05 | 1.47E+05 | 1.46E+05 | 1.57E+05 | 3.22E+05 | 3.18E+05 | 7.71E-01 | 2.98E-02 | 7.01E-02 | 0.38  | 1.31  | 0.94  |
| A0A1D3K2Y2 | 12 (2)  | 78.8  | 4.46E-03 | 3.06E+04 | 2.01E+04 | 2.45E+04 | 6.42E+04 | 6.93E+04 | 6.03E+04 | 7.46E+04 | 9.70E+04 | 1.31E+05 | 6.32E-02 | 3.60E-03 | 8.59E-02 | 1.37  | 2.01  | 0.64  |
| A0A1D3K2Y3 | 36 (12) | 196.0 | 1.42E-01 | 2.25E+06 | 1.03E+06 | 2.08E+06 | 2.23E+06 | 2.03E+06 | 1.92E+06 | 1.37E+06 | 1.36E+06 | 1.20E+06 | 6.98E-01 | 3.63E-01 | 1.29E-01 | 0.20  | -0.45 | -0.65 |
| A0A1D3K2Z9 | 14 (6)  | 86.7  | 5.27E-02 | 9.42E+04 | 9.23E+04 | 9.37E+04 | 6.77E+04 | 6.74E+04 | 6.78E+04 | 9.38E+04 | 6.81E+04 | 5.90E+04 | 5.29E-02 | 1.28E-01 | 7.71E-01 | -0.47 | -0.34 | 0.12  |
| A0A1D3K314 | 2 (1)   | 11.8  | 8.01E-05 | 3.31E+03 | 4.23E+03 | 3.63E+03 | 1.77E+03 | 1.48E+03 | 1.91E+03 | 6.97E+02 | 9.17E+02 | 9.95E+02 | 5.37E-04 | 7.32E-05 | 3.57E-02 | -1.11 | -2.10 | -0.98 |
| A0A1D3K322 | 3 (0)   | 19.9  | NA       | NA    | NA    | NA    |
| A0A1D3K323 | 4 (0)   | 20.5  | NA       | NA    | NA    | NA    |
| A0A1D3K332 | 32 (10) | 250.1 | 3.87E-04 | 6.31E+05 | 7.42E+05 | 7.46E+05 | 5.51E+05 | 5.30E+05 | 5.94E+05 | 3.39E+05 | 3.84E+05 | 2.74E+05 | 3.22E-02 | 3.18E-04 | 4.65E-03 | -0.34 | -1.09 | -0.75 |
| A0A1D3K334 | 9 (4)   | 83.4  | 1.79E-02 | 4.29E+05 | 5.38E+05 | 4.53E+05 | 3.62E+05 | 3.77E+05 | 3.11E+05 | 3.84E+05 | 3.35E+05 | 3.41E+05 | 2.61E-02 | 2.90E-02 | 9.96E-01 | -0.43 | -0.42 | 0.01  |
| A0A1D3K335 | 74 (21) | 480.5 | 5.27E-01 | 1.77E+06 | 4.93E+06 | 1.56E+06 | 2.00E+06 | 3.11E+06 | 1.67E+06 | 1.38E+06 | 2.02E+06 | 1.37E+06 | 8.73E-01 | 5.00E-01 | 7.79E-01 | -0.28 | -0.79 | -0.51 |
| A0A1D3K342 | 30 (11) | 176.0 | 1.61E-03 | 1.08E+06 | 1.16E+06 | 1.10E+06 | 1.38E+06 | 1.42E+06 | 2.30E+06 | 2.65E+06 | 2.92E+06 | 3.14E+06 | 1.54E-01 | 1.42E-03 | 1.06E-02 | 0.62  | 1.16  | 0.54  |
| A0A1D3K345 | 12 (3)  | 53.4  | 2.18E-03 | 1.67E+05 | 1.20E+05 | 1.36E+05 | 2.01E+05 | 2.81E+05 | 1.61E+05 | 3.28E+05 | 3.36E+05 | 3.58E+05 | 1.29E-01 | 1.85E-03 | 1.75E-02 | 0.61  | 1.27  | 0.67  |
| A0A1D3K353 | 6 (2)   | 31.0  | 8.99E-04 | 1.40E+04 | 1.38E+04 | 1.27E+04 | 7.72E+03 | 1.01E+04 | 8.58E+03 | 2.06E+04 | 2.48E+04 | 2.96E+04 | 1.67E-01 | 4.99E-03 | 8.32E-04 | -0.62 | 0.89  | 1.51  |
| A0A1D3K358 | 3 (0)   | 13.8  | NA       | NA    | NA    | NA    |
| A0A1D3K362 | 20 (5)  | 124.5 | 6.03E-01 | 6.87E+05 | 1.06E+06 | 4.47E+05 | 9.50E+05 | 9.26E+05 | 7.88E+05 | 7.84E+05 | 8.23E+05 | 9.41E+05 | 5.99E-01 | 7.41E-01 | 9.66E-01 | 0.28  | 0.22  | -0.06 |
| A0A1D3K366 | 13 (4)  | 56.7  | NA       | NA    | NA    | NA    |
| A0A1D3K367 | 10 (1)  | 59.0  | 5.19E-01 | 1.27E+02 | 6.26E+01 | 3.94E+03 | 1.03E+02 | 1.35E+02 | 3.05E+01 | 6.15E+02 | 5.61E+01 | 1.06E+03 | 4.96E-01 | 7.48E-01 | 8.94E-01 | -3.95 | -1.25 | 2.69  |
| A0A1D3K371 | 2 (1)   | 12.2  | 5.53E-06 | 2.34E+04 | 2.09E+04 | 2.28E+04 | 9.78E+03 | 8.75E+03 | 9.56E+03 | 9.76E+03 | 9.87E+03 | 8.07E+03 | 9.89E-06 | 9.32E-06 | 9.88E-01 | -1.26 | -1.28 | -0.02 |
| A0A1D3K372 | 5 (0)   | 29.9  | NA       | NA    | NA    | NA    |
| A0A1D3K378 | 6 (2)   | 31.2  | 9.87E-01 | 7.66E+04 | 5.59E+04 | 5.78E+04 | 5.16E+04 | 9.02E+04 | 5.99E+04 | 7.43E+04 | 1.55E+04 | 1.05E+05 | 9.86E-01 | 9.98E-01 | 9.95E-01 | 0.08  | 0.03  | -0.05 |
| A0A1D3K382 | 11 (4)  | 62.2  | 2.03E-01 | 1.81E+05 | 1.37E+05 | 1.59E+05 | 1.67E+05 | 1.74E+05 | 1.67E+05 | 1.51E+05 | 1.18E+05 | 1.53E+05 | 7.46E-01 | 4.55E-01 | 1.86E-01 | 0.09  | -0.17 | -0.26 |
| A0A1D3K388 | 12 (2)  | 73.8  | 3.52E-03 | 1.23E+05 | 1.00E+05 | 1.28E+05 | 1.48E+05 | 1.48E+05 | 1.19E+05 | 1.73E+05 | 1.80E+05 | 1.84E+05 | 2.07E-01 | 3.08E-03 | 2.24E-02 | 0.24  | 0.61  | 0.37  |
| A0A1D3K395 | 5 (0)   | 28.5  | NA       | NA    | NA    | NA    |
| A0A1D3K397 | 9 (0)   | 77.5  | NA       | NA    | NA    | NA    |
| A0A1D3K398 | 2 (1)   | 10.5  | 1.40E-01 | 5.56E+04 | 4.49E+04 | 5.87E+04 | 4.61E+04 | 4.51E+04 | 4.66E+04 | 4.93E+04 | 4.23E+04 | 3.97E+04 | 2.71E-01 | 1.40E-01 | 8.62E-01 | -0.21 | -0.28 | -0.07 |
| A0A1D3K399 | 6 (0)   | 44.6  | NA       | NA    | NA    | NA    |
| A0A1D3K3A4 | 48 (20) | 378.2 | 9.22E-05 | 6.25E+05 | 5.12E+05 | 5.67E+05 | 7.14E+05 | 7.58E+05 | 6.56E+05 | 1.19E+06 | 1.22E+06 | 1.40E+06 | 1.60E-01 | 9.98E-05 | 3.57E-04 | 0.32  | 1.16  | 0.84  |
| A0A1D3K3A7 | 6 (1)   | 47.5  | NA       | NA    | NA    | NA    |
| A0A1D3K3B1 | 23 (6)  | 158.5 | 4.34E-01 | 3.28E+05 | 1.83E+05 | 1.85E+05 | 2.16E+05 | 1.81E+05 | 1.70E+05 | 1.71E+05 | 1.34E+05 | 2.10E+05 | 6.24E-01 | 4.24E-01 | 9.24E-01 | -0.30 | -0.43 | -0.14 |
| A0A1D3K3B3 | 2 (0)   | 4.8   | NA       | NA    | NA    | NA    |
| A0A1D3K3C7 | 12 (4)  | 82.2  | 2.56E-01 | 2.77E+05 | 2.31E+05 | 2.60E+05 | 3.05E+05 | 3.28E+05 | 2.59E+05 | 3.77E+05 | 3.07E+05 | 2.65E+05 | 4.75E-01 | 2.43E-01 | 8.37E-01 | 0.22  | 0.31  | 0.09  |
| A0A1D3K3D5 | 6 (1)   | 38.3  | 1.65E-02 | 4.62E+03 | 4.25E+03 | 4.78E+03 | 2.85E+03 | 2.60E+03 | 2.00E+03 | 4.20E+03 | 3.08E+03 | 2.36E+03 | 1.45E-02 | 8.22E-02 | 3.72E-01 | -0.87 | -0.50 | 0.37  |
| A0A1D3K3F7 | 9 (1)   | 56.3  | NA       | NA    | NA    | NA    |
| A0A1D3K3F8 | 3 (0)   | 15.9  | NA       | NA    | NA    | NA    |
| A0A1D3K3G0 | 3 (0)   | 14.1  | NA       | NA    | NA    | NA    |
| A0A1D3K3G5 | 3 (0)   | 15.9  | NA       | NA    | NA    | NA    |
| A0A1D3K3G8 | 2 (0)   | 11.6  | NA       | NA    | NA    | NA    |
| A0A1D3K3H2 | 14 (5)  | 94.7  | 3.87E-01 | 1.77E+05 | 1.57E+05 | 1.80E+05 | 1.65E+05 | 1.69E+05 | 1.68E+05 | 2.42E+05 | 1.90E+05 | 1.57E+05 | 9.83E-01 | 4.97E-01 | 4.10E-01 | -0.03 | 0.20  | 0.23  |
| A0A1D3K3I7 | 2 (1)   | 11.2  | 3.01E-03 | 3.81E+03 | 2.41E+03 | 2.84E+03 | 9.12E+02 | 8.00E+02 | 5.89E+02 | 1.20E+03 | 1.36E+03 | 1.90E+03 | 2.70E-03 | 1.71E-02 | 2.32E-01 | -1.98 | -1.03 | 0.95  |
| A0A1D3K3J3 | 9 (2)   | 48.6  | NA       | NA    | NA    | NA    |
| A0A1D3K3K1 | 18 (9)  | 117.3 | 5.51E-01 | 1.40E+05 | 1.50E+05 | 1.48E+05 | 1.46E+05 | 1.38E+05 | 2.07E+05 | 1.47E+05 | 1.50E+05 | 1.38E+05 | 6.23E-01 | 9.98E-01 | 5.92E-01 | 0.16  | -0.01 | -0.17 |
| A0A1D3K3K8 | 5 (3)   | 46.0  | 2.11E-03 | 4.12E+04 | 4.93E+04 | 4.96E+04 | 2.91E+04 | 2.65E+04 | 3.45E+04 | 2.12E+04 | 2.85E+04 | 2.70E+04 | 7.33E-03 | 2.22E-03 | 4.54E-01 | -0.64 | -0.87 | -0.23 |
| A0A1D3K3K9 | 7 (1)   | 84.3  | NA       | NA    | NA    | NA    |
| A0A1D3K3L5 | 3 (0)   | 15.8  | NA       | NA    | NA    | NA    |
| A0A1D3K3L8 | 3 (1)   | 68.4  | 2.02E-02 | 7.51E+04 | 1.46E+05 | 1.05E+05 | 1.68E+05 | 1.81E+05 | 1.67E+05 | 1.79E+05 | 1.57E+05 | 1.71E+05 | 2.81E-02 | 3.43E-02 | 9.85E-01 | 0.68  | 0.66  | -0.03 |
| A0A1D3K3M6 | 4 (1)   | 22.6  | 8.45E-04 | 8.77E+03 | 6.82E+03 | 9.84E+03 | 3.35E+03 | 2.45E+03 | 1.61E+03 | 3.04E+03 | 1.28E+03 | 1.17E+03 | 1.95E-03 | 1.14E-03 | 7.94E-01 | -1.78 | -2.21 | -0.43 |
| A0A1D3K3M8 | 4 (0)   | 15.3  | NA       | NA    | NA    | NA    |
| A0A1D3K3P0 | 7 (3)   | 41.2  | 3.81E-03 | 6.93E+04 | 7.21E+04 | 9.07E+04 | 4.02E+04 | 4.38E+04 | 3.25E+04 | 4.96E+04 | 5.64E+04 | 4.22E+04 | 3.62E-03 | 1.68E-02 | 3.51E-01 | -0.99 | -0.65 | 0.35  |
| A0A1D3K3P2 | 13 (3)  | 56.7  | NA       | NA    | NA    | NA    |
| A0A1D3K3P7 | 7 (2)   | 40.9  | 3.85E-02 | 8.00E+04 | 6.85E+04 | 7.58E+04 | 1.06E+05 | 1.07E+05 | 1.03E+05 | 9.55E+04 | 5.43E+04 | 5.25E+04 | 8.85E-02 | 8.15E-01 | 4.09E-02 | 0.50  | -0.15 | -0.65 |

|            |         |       |          |          |          |          |          |          |          |          |          |          |          |          |          |       |       |       |
|------------|---------|-------|----------|----------|----------|----------|----------|----------|----------|----------|----------|----------|----------|----------|----------|-------|-------|-------|
| A0A1D3K3P9 | 13 (2)  | 64.6  | 5.85E-03 | 1.57E+04 | 1.49E+04 | 1.78E+04 | 3.11E+04 | 2.94E+04 | 4.82E+04 | 5.40E+04 | 3.96E+04 | 5.58E+04 | 4.82E-02 | 4.87E-03 | 1.71E-01 | 0.75  | 0.99  | 0.24  |
| A0A1D3K3Q9 | 36 (11) | 250.2 | 7.78E-01 | 1.01E+06 | 9.64E+05 | 9.55E+05 | 8.78E+05 | 9.29E+05 | 6.95E+05 | 1.58E+06 | 7.87E+05 | 6.30E+05 | 8.39E-01 | 9.95E-01 | 7.88E-01 | -0.23 | 0.04  | 0.26  |
| A0A1D3K3R3 | 5 (0)   | 25.7  | NA       | NA    | NA    | NA    |
| A0A1D3K3R6 | 20 (4)  | 102.5 | 1.11E-04 | 2.17E+05 | 2.45E+05 | 2.31E+05 | 3.21E+05 | 3.36E+05 | 2.88E+05 | 4.52E+05 | 4.00E+05 | 4.32E+05 | 8.52E-03 | 8.92E-05 | 1.92E-03 | 0.45  | 0.89  | 0.44  |
| A0A1D3K3S6 | 14 (5)  | 77.6  | 7.91E-03 | 2.16E+05 | 1.70E+05 | 1.99E+05 | 3.37E+05 | 3.64E+05 | 2.91E+05 | 2.89E+05 | 2.11E+05 | 2.39E+05 | 6.74E-03 | 2.37E-01 | 5.27E-02 | 0.76  | 0.34  | -0.43 |
| A0A1D3K3T4 | 5 (2)   | 40.5  | 9.12E-01 | 3.41E+04 | 5.54E+04 | 3.80E+04 | 3.57E+04 | 3.23E+04 | 5.10E+04 | 3.64E+04 | 4.62E+04 | 4.45E+04 | 9.24E-01 | 1.00E+00 | 9.30E-01 | -0.10 | 0.00  | 0.10  |
| A0A1D3K3T6 | 5 (1)   | 56.7  | NA       | NA    | NA    | NA    |
| A0A1D3K3U5 | 3 (1)   | 48.6  | NA       | NA    | NA    | NA    |
| A0A1D3K3U7 | 64 (17) | 454.4 | 9.00E-02 | 2.27E+06 | 1.60E+06 | 1.02E+06 | 1.11E+06 | 1.00E+06 | 1.16E+06 | 7.85E+05 | 9.18E+05 | 7.85E+05 | 2.49E-01 | 8.28E-02 | 6.78E-01 | -0.58 | -0.98 | -0.39 |
| A0A1D3K3U9 | 6 (1)   | 41.3  | 9.53E-01 | 1.61E+05 | 1.94E+05 | 2.75E+05 | 1.90E+05 | 2.06E+05 | 2.10E+05 | 2.18E+05 | 2.25E+05 | 1.87E+05 | 9.61E-01 | 1.00E+00 | 9.61E-01 | -0.06 | 0.00  | 0.06  |
| A0A1D3K3V1 | 7 (3)   | 48.0  | 9.77E-02 | 1.39E+05 | 1.70E+05 | 1.65E+05 | 1.28E+05 | 1.26E+05 | 1.45E+05 | 1.31E+05 | 1.48E+05 | 1.32E+05 | 1.07E-01 | 1.74E-01 | 9.24E-01 | -0.25 | -0.21 | 0.04  |
| A0A1D3K3V4 | 13 (2)  | 77.9  | 1.11E-02 | 1.83E+05 | 1.40E+05 | 1.63E+05 | 8.44E+04 | 8.90E+04 | 5.18E+04 | 1.21E+05 | 7.47E+04 | 5.67E+04 | 1.41E-02 | 2.29E-02 | 9.06E-01 | -1.11 | -0.95 | 0.16  |
| A0A1D3K3W3 | 24 (11) | 225.8 | 4.83E-01 | 1.61E+06 | 1.36E+06 | 1.56E+06 | 1.49E+06 | 1.54E+06 | 1.29E+06 | 1.43E+06 | 1.52E+06 | 9.61E+05 | 9.05E-01 | 4.64E-01 | 6.99E-01 | -0.07 | -0.21 | -0.14 |
| A0A1D3K3W6 | 9 (2)   | 50.0  | 1.09E-01 | 1.45E+04 | 1.08E+04 | 1.37E+04 | 7.51E+03 | 9.50E+03 | 5.58E+03 | 1.35E+04 | 6.75E+03 | 7.24E+03 | 1.03E-01 | 2.62E-01 | 7.51E-01 | -0.79 | -0.51 | 0.28  |
| A0A1D3K3X1 | 8 (5)   | 43.5  | 3.89E-02 | 1.83E+04 | 2.16E+04 | 1.89E+04 | 3.47E+04 | 3.17E+04 | 5.49E+04 | 5.34E+04 | 6.64E+04 | 1.22E+05 | 5.20E-01 | 3.48E-02 | 1.47E-01 | 1.04  | 2.04  | 0.99  |
| A0A1D3K3Z2 | 6 (1)   | 59.4  | NA       | NA    | NA    | NA    |
| A0A1D3K3Z6 | 20 (5)  | 142.2 | 5.83E-02 | 1.83E+05 | 1.81E+05 | 2.06E+05 | 2.81E+05 | 2.86E+05 | 2.79E+05 | 2.45E+05 | 3.09E+05 | 1.85E+05 | 5.09E-02 | 2.28E-01 | 5.02E-01 | 0.57  | 0.37  | -0.20 |
| A0A1D3K402 | 21 (7)  | 122.7 | 4.30E-04 | 1.39E+05 | 1.34E+05 | 1.56E+05 | 2.00E+05 | 2.06E+05 | 1.76E+05 | 3.98E+05 | 3.24E+05 | 4.45E+05 | 2.83E-01 | 4.58E-04 | 1.62E-03 | 0.44  | 1.44  | 1.00  |
| A0A1D3K403 | 9 (1)   | 46.7  | 6.02E-01 | 5.55E+02 | 3.19E+03 | 9.07E+02 | 1.83E+03 | 6.71E+02 | 3.94E+03 | 0.00E+00 | 2.13E+03 | 6.73E+02 | 8.66E-01 | 8.57E-01 | 5.75E-01 | 0.47  | -0.73 | -1.20 |
| A0A1D3K406 | 9 (0)   | 43.4  | NA       | NA    | NA    | NA    |
| A0A1D3K408 | 16 (1)  | 85.8  | 5.52E-01 | 1.50E+03 | 5.46E+01 | 2.90E+03 | 1.74E+03 | 4.66E+03 | 4.68E+03 | 1.02E+03 | 0.00E+00 | 6.42E+03 | 5.25E-01 | 8.66E-01 | 8.11E-01 | 1.32  | 0.74  | -0.57 |
| A0A1D3K427 | 3 (2)   | 15.8  | 1.47E-01 | 8.61E+04 | 8.66E+04 | 9.37E+04 | 1.13E+05 | 1.12E+05 | 1.09E+05 | 7.74E+04 | 1.02E+05 | 1.17E+05 | 1.29E-01 | 5.77E-01 | 4.62E-01 | 0.33  | 0.16  | -0.17 |
| A0A1D3K431 | 7 (3)   | 41.3  | 1.33E-01 | 1.10E+05 | 1.36E+05 | 1.24E+05 | 1.77E+05 | 1.61E+05 | 2.34E+05 | 7.88E+04 | 1.75E+05 | 1.48E+05 | 1.44E-01 | 9.34E-01 | 2.25E-01 | 0.63  | 0.12  | -0.51 |
| A0A1D3K434 | 16 (4)  | 75.3  | 3.99E-01 | 3.27E+05 | 2.59E+05 | 3.08E+05 | 2.90E+05 | 3.18E+05 | 2.19E+05 | 3.74E+05 | 3.34E+05 | 2.80E+05 | 8.24E-01 | 6.85E-01 | 3.73E-01 | -0.11 | 0.14  | 0.26  |
| A0A1D3K439 | 2 (0)   | 10.5  | NA       | NA    | NA    | NA    |
| A0A1D3K442 | 8 (1)   | 38.0  | 1.11E-01 | 9.94E+04 | 8.16E+04 | 9.50E+04 | 8.45E+04 | 8.20E+04 | 7.95E+04 | 8.40E+04 | 8.12E+04 | 7.85E+04 | 1.67E-01 | 1.34E-01 | 9.84E-01 | -0.17 | -0.18 | -0.01 |
| A0A1D3K443 | 28 (10) | 184.6 | 2.41E-01 | 1.44E+05 | 1.34E+05 | 1.36E+05 | 1.30E+05 | 1.47E+05 | 1.87E+05 | 1.29E+05 | 1.23E+05 | 1.31E+05 | 5.02E-01 | 7.72E-01 | 2.22E-01 | 0.17  | -0.11 | -0.28 |
| A0A1D3K444 | 2 (0)   | 11.3  | NA       | NA    | NA    | NA    |
| A0A1D3K451 | 30 (9)  | 169.0 | 3.09E-02 | 2.05E+05 | 1.55E+05 | 1.79E+05 | 2.01E+05 | 2.21E+05 | 1.47E+05 | 4.33E+05 | 2.42E+05 | 3.48E+05 | 9.80E-01 | 4.12E-02 | 5.20E-02 | 0.07  | 0.92  | 0.85  |
| A0A1D3K459 | 8 (2)   | 59.5  | NA       | NA    | NA    | NA    |
| A0A1D3K465 | 8 (4)   | 65.4  | 3.69E-01 | 2.37E+05 | 1.83E+05 | 2.07E+05 | 1.75E+05 | 1.95E+05 | 1.24E+05 | 2.26E+05 | 1.46E+05 | 1.36E+05 | 3.98E-01 | 4.70E-01 | 9.87E-01 | -0.34 | -0.30 | 0.04  |
| A0A1D3K476 | 3 (1)   | 58.4  | 9.66E-03 | 1.87E+04 | 2.03E+04 | 1.86E+04 | 2.95E+04 | 2.59E+04 | 3.43E+04 | 2.93E+04 | 2.79E+04 | 2.44E+04 | 9.48E-03 | 3.40E-02 | 5.26E-01 | 0.64  | 0.50  | -0.14 |
| A0A1D3K477 | 6 (0)   | 39.6  | NA       | NA    | NA    | NA    |
| A0A1D3K478 | 15 (4)  | 112.7 | 3.01E-02 | 1.62E+05 | 1.12E+05 | 1.46E+05 | 1.65E+05 | 1.74E+05 | 1.46E+05 | 2.53E+05 | 1.87E+05 | 2.05E+05 | 5.88E-01 | 2.82E-02 | 1.00E-01 | 0.21  | 0.62  | 0.41  |
| A0A1D3K486 | 6 (2)   | 53.9  | NA       | NA    | NA    | NA    |
| A0A1D3K488 | 11 (3)  | 50.1  | 1.05E-01 | 2.30E+04 | 2.24E+04 | 2.14E+04 | 2.56E+04 | 2.26E+04 | 2.71E+04 | 2.36E+04 | 3.72E+04 | 4.57E+04 | 8.63E-01 | 1.07E-01 | 2.09E-01 | 0.17  | 0.67  | 0.50  |
| A0A1D3K496 | 20 (4)  | 61.4  | NA       | NA    | NA    | NA    |
| A0A1D3K4A0 | 3 (1)   | 16.2  | 6.66E-02 | 4.14E+03 | 4.05E+03 | 3.80E+03 | 3.04E+03 | 3.84E+03 | 2.82E+03 | 2.69E+03 | 3.54E+03 | 2.37E+03 | 2.02E-01 | 6.10E-02 | 6.36E-01 | -0.31 | -0.48 | -0.17 |
| A0A1D3K4A8 | 4 (1)   | 23.4  | 1.18E-03 | 3.97E+04 | 2.77E+04 | 3.36E+04 | 4.11E+04 | 4.61E+04 | 3.54E+04 | 1.30E+05 | 8.59E+04 | 1.02E+05 | 8.05E-01 | 1.58E-03 | 2.72E-03 | 0.28  | 1.66  | 1.38  |
| A0A1D3K4B7 | 2 (1)   | 48.4  | NA       | NA    | NA    | NA    |
| A0A1D3K4C4 | 2 (0)   | 9.3   | NA       | NA    | NA    | NA    |
| A0A1D3K4D2 | 4 (0)   | 25.0  | NA       | NA    | NA    | NA    |
| A0A1D3K4D7 | 3 (0)   | 9.2   | NA       | NA    | NA    | NA    |
| A0A1D3K4G0 | 3 (1)   | 11.0  | 5.29E-01 | 3.35E+04 | 2.14E+04 | 2.82E+04 | 1.98E+04 | 3.75E+04 | 2.55E+04 | 3.35E+04 | 3.14E+03 | 1.90E+04 | 1.00E+00 | 5.82E-01 | 5.89E-01 | -0.01 | -0.58 | -0.57 |
| A0A1D3K4G6 | 20 (7)  | 149.4 | 1.42E-03 | 8.94E+05 | 7.08E+05 | 8.33E+05 | 1.18E+06 | 1.27E+06 | 1.28E+06 | 1.12E+06 | 9.71E+05 | 1.06E+06 | 1.14E-03 | 2.12E-02 | 4.94E-02 | 0.62  | 0.37  | -0.24 |
| A0A1D3K4H2 | 3 (0)   | 15.2  | NA       | NA    | NA    | NA    |
| A0A1D3K4H5 | 6 (3)   | 38.3  | 3.07E-04 | 1.74E+05 | 1.95E+05 | 1.77E+05 | 3.39E+05 | 3.20E+05 | 2.50E+05 | 4.83E+05 | 4.10E+05 | 4.33E+05 | 1.29E-02 | 2.43E-04 | 6.72E-03 | 0.74  | 1.28  | 0.54  |
| A0A1D3K4H8 | 3 (0)   | 17.9  | NA       | NA    | NA    | NA    |
| A0A1D3K4I6 | 14 (4)  | 123.2 | 7.34E-01 | 3.38E+05 | 2.66E+05 | 3.17E+05 | 3.14E+05 | 3.16E+05 | 2.54E+05 | 3.63E+05 | 2.26E+05 | 2.25E+05 | 9.59E-01 | 7.19E-01 | 8.65E-01 | -0.06 | -0.18 | -0.12 |
| A0A1D3K4I7 | 8 (1)   | 51.6  | 2.77E-01 | 1.76E+04 | 1.55E+04 | 1.94E+04 | 2.77E+04 | 3.05E+04 | 8.30E+03 | 1.19E+04 | 1.04E+04 | 1.31E+04 | 7.15E-01 | 6.13E-01 | 2.52E-01 | 0.34  | -0.57 | -0.91 |
| A0A1D3K4J2 | 28 (8)  | 155.2 | 1.43E-01 | 1.52E+05 | 1.10E+05 | 1.31E+05 | 1.65E+05 | 1.81E+05 | 1.29E+05 | 1.72E+05 | 1.68E+05 | 1.61E+05 | 2.80E-01 | 1.42E-01 | 8.54E-01 | 0.27  | 0.35  | 0.08  |
| A0A1D3K4J6 | 6 (1)   | 41.2  | 6.45E-02 | 9.74E+03 | 1.17E+04 | 1.13E+04 | 9.03E+03 | 7.90E+03 | 1.02E+04 | 7.45E+03 | 9.57E+03 | 6.75E+03 | 2.35E-01 | 5.69E-02 | 5.37E-01 | -0.27 | -0.46 | -0.19 |

|            |         |       |          |          |          |          |          |          |          |          |          |          |          |          |          |       |       |       |
|------------|---------|-------|----------|----------|----------|----------|----------|----------|----------|----------|----------|----------|----------|----------|----------|-------|-------|-------|
| A0A1D3K4K1 | 8 (2)   | 69.2  | 7.84E-03 | 2.98E+05 | 3.35E+05 | 2.97E+05 | 4.00E+05 | 3.89E+05 | 4.26E+05 | 3.45E+05 | 3.61E+05 | 3.02E+05 | 7.47E-03 | 4.44E-01 | 3.13E-02 | 0.39  | 0.12  | -0.27 |
| A0A1D3K4K4 | 9 (1)   | 69.9  | 5.24E-01 | 1.08E+05 | 8.71E+04 | 1.03E+05 | 9.46E+04 | 9.68E+04 | 7.29E+04 | 1.12E+05 | 6.43E+04 | 6.87E+04 | 7.40E-01 | 5.03E-01 | 9.06E-01 | -0.17 | -0.28 | -0.11 |
| A0A1D3K4K6 | 6 (0)   | 35.2  | NA       | NA    | NA    | NA    |
| A0A1D3K4K8 | 4 (2)   | 28.6  | 2.07E-03 | 6.00E+04 | 4.49E+04 | 4.80E+04 | 8.44E+04 | 9.68E+04 | 8.00E+04 | 7.40E+04 | 7.21E+04 | 7.77E+04 | 1.79E-03 | 1.45E-02 | 1.54E-01 | 0.77  | 0.55  | -0.22 |
| A0A1D3K4L0 | 3 (0)   | 15.9  | NA       | NA    | NA    | NA    |
| A0A1D3K4L2 | 8 (4)   | 63.5  | 3.41E-02 | 2.21E+05 | 3.20E+05 | 2.41E+05 | 3.45E+05 | 3.01E+05 | 3.23E+05 | 2.03E+05 | 2.34E+05 | 2.38E+05 | 1.48E-01 | 4.53E-01 | 2.99E-02 | 0.31  | -0.21 | -0.52 |
| A0A1D3K4L5 | 20 (6)  | 152.6 | 2.46E-02 | 5.65E+05 | 5.29E+05 | 5.80E+05 | 3.96E+05 | 4.29E+05 | 3.61E+05 | 4.97E+05 | 3.65E+05 | 3.09E+05 | 3.94E-02 | 3.52E-02 | 9.95E-01 | -0.50 | -0.51 | -0.02 |
| A0A1D3K4M1 | 60 (15) | 359.2 | 1.50E-01 | 4.36E+05 | 5.93E+05 | 4.44E+05 | 3.39E+05 | 3.39E+05 | 4.90E+05 | 3.36E+05 | 4.08E+05 | 2.97E+05 | 3.24E-01 | 1.43E-01 | 7.95E-01 | -0.33 | -0.50 | -0.17 |
| A0A1D3K4M2 | 7 (1)   | 59.7  | 3.44E-02 | 1.24E+04 | 7.56E+03 | 6.46E+03 | 9.81E+03 | 1.19E+04 | 7.64E+03 | 1.46E+04 | 1.65E+04 | 1.39E+04 | 8.67E-01 | 3.86E-02 | 7.29E-02 | 0.15  | 0.77  | 0.62  |
| A0A1D3K4M3 | 5 (0)   | 27.1  | NA       | NA    | NA    | NA    |
| A0A1D3K4M5 | 11 (2)  | 76.3  | 4.84E-03 | 3.28E+03 | 4.76E+03 | 5.08E+03 | 9.89E+03 | 9.59E+03 | 1.35E+04 | 7.58E+03 | 9.60E+03 | 8.15E+03 | 4.08E-03 | 3.76E-02 | 1.75E-01 | 1.33  | 0.95  | -0.38 |
| A0A1D3K4M9 | 13 (5)  | 82.8  | 2.50E-02 | 3.58E+05 | 2.65E+05 | 3.06E+05 | 4.56E+05 | 5.08E+05 | 3.47E+05 | 3.08E+05 | 1.97E+05 | 1.84E+05 | 1.29E-01 | 3.71E-01 | 2.15E-02 | 0.50  | -0.43 | -0.93 |
| A0A1D3K4N2 | 8 (4)   | 61.1  | 3.25E-02 | 3.73E+05 | 2.93E+05 | 3.57E+05 | 2.49E+05 | 2.70E+05 | 2.06E+05 | 2.87E+05 | 2.11E+05 | 2.05E+05 | 5.55E-02 | 4.23E-02 | 9.74E-01 | -0.50 | -0.54 | -0.04 |
| A0A1D3K4N4 | 8 (3)   | 74.9  | 7.73E-01 | 3.86E+05 | 3.79E+05 | 4.02E+05 | 4.10E+05 | 3.98E+05 | 4.11E+05 | 4.18E+05 | 4.23E+05 | 3.25E+05 | 8.07E-01 | 1.00E+00 | 8.07E-01 | 0.06  | 0.00  | -0.06 |
| A0A1D3K4N7 | 24 (7)  | 211.9 | 3.82E-01 | 6.25E+05 | 6.21E+05 | 6.80E+05 | 7.35E+05 | 7.23E+05 | 7.64E+05 | 8.03E+05 | 8.32E+05 | 5.61E+05 | 4.16E-01 | 4.76E-01 | 9.92E-01 | 0.21  | 0.19  | -0.02 |
| A0A1D3K4N8 | 3 (2)   | 32.1  | 5.45E-05 | 9.40E+04 | 9.96E+04 | 8.95E+04 | 1.42E+05 | 1.53E+05 | 1.78E+05 | 4.39E+04 | 3.79E+04 | 3.05E+04 | 1.55E-03 | 2.68E-03 | 4.27E-05 | 0.74  | -1.33 | -2.07 |
| A0A1D3K4N9 | 2 (1)   | 10.3  | 6.66E-01 | 9.90E+04 | 1.10E+05 | 1.03E+05 | 1.15E+05 | 9.84E+04 | 1.50E+05 | 1.00E+05 | 1.49E+05 | 9.58E+04 | 6.47E-01 | 8.34E-01 | 9.39E-01 | 0.22  | 0.15  | -0.08 |
| A0A1D3K4P2 | 3 (1)   | 20.9  | 2.62E-02 | 5.26E+03 | 9.18E+03 | 8.43E+03 | 3.47E+04 | 3.76E+04 | 8.69E+04 | 8.19E+03 | 5.93E+03 | 9.14E+03 | 3.91E-02 | 1.00E+00 | 3.96E-02 | 2.80  | 0.02  | -2.77 |
| A0A1D3K4P3 | 17 (8)  | 130.9 | 1.73E-02 | 4.72E+05 | 4.50E+05 | 3.23E+05 | 5.94E+05 | 6.65E+05 | 5.47E+05 | 4.63E+05 | 4.50E+05 | 4.13E+05 | 2.01E-02 | 8.48E-01 | 3.85E-02 | 0.54  | 0.09  | -0.45 |
| A0A1D3K4P6 | 5 (1)   | 32.1  | 5.72E-01 | 4.08E+01 | 3.62E+03 | 3.45E+02 | 6.15E+02 | 5.17E+02 | 1.47E+04 | 2.39E+01 | 9.73E+02 | 3.39E+03 | 6.18E-01 | 9.99E-01 | 6.36E-01 | 1.98  | 0.13  | -1.85 |
| A0A1D3K4P8 | 6 (2)   | 37.1  | 1.15E-01 | 3.18E+05 | 2.59E+05 | 2.95E+05 | 3.11E+05 | 3.11E+05 | 2.31E+05 | 2.70E+05 | 1.88E+05 | 1.61E+05 | 9.82E-01 | 1.37E-01 | 1.73E-01 | -0.03 | -0.50 | -0.46 |
| A0A1D3K4Q0 | 7 (3)   | 26.1  | 1.06E-02 | 8.41E+04 | 7.88E+04 | 8.94E+04 | 1.04E+05 | 9.53E+04 | 1.12E+05 | 7.34E+04 | 7.54E+04 | 8.67E+04 | 3.23E-02 | 6.23E-01 | 1.09E-02 | 0.31  | -0.10 | -0.41 |
| A0A1D3K4Q1 | 10 (5)  | 35.5  | 3.25E-01 | 4.99E+05 | 4.23E+05 | 4.88E+05 | 4.46E+05 | 4.71E+05 | 4.29E+05 | 4.96E+05 | 3.56E+05 | 3.32E+05 | 8.95E-01 | 3.15E-01 | 5.21E-01 | -0.07 | -0.25 | -0.19 |
| A0A1D3K4Q3 | 13 (4)  | 91.8  | 1.04E-01 | 1.02E+05 | 7.50E+04 | 9.09E+04 | 5.52E+04 | 6.10E+04 | 4.36E+04 | 9.10E+04 | 5.18E+04 | 4.11E+04 | 1.05E-01 | 2.12E-01 | 8.50E-01 | -0.74 | -0.54 | 0.20  |
| A0A1D3K4Q4 | 6 (3)   | 34.7  | 3.13E-02 | 1.27E+05 | 2.06E+05 | 1.30E+05 | 5.13E+04 | 4.40E+04 | 6.43E+04 | 4.75E+04 | 1.11E+05 | 1.16E+05 | 2.71E-02 | 1.47E-01 | 4.16E-01 | -1.53 | -0.75 | 0.78  |
| A0A1D3K4Q5 | 5 (1)   | 48.6  | NA       | NA    | NA    | NA    |
| A0A1D3K4Q7 | 15 (7)  | 98.7  | 1.98E-02 | 5.97E+05 | 5.59E+05 | 6.17E+05 | 4.68E+05 | 4.85E+05 | 4.69E+05 | 5.06E+05 | 4.49E+05 | 3.48E+05 | 6.19E-02 | 1.94E-02 | 6.19E-01 | -0.32 | -0.44 | -0.13 |
| A0A1D3K4Q9 | 11 (4)  | 67.7  | 8.73E-02 | 1.15E+05 | 1.36E+05 | 1.22E+05 | 9.51E+04 | 1.03E+05 | 1.32E+05 | 1.06E+05 | 8.34E+04 | 8.47E+04 | 5.07E-01 | 7.58E-02 | 3.33E-01 | -0.17 | -0.44 | -0.27 |
| A0A1D3K4R1 | 9 (4)   | 62.0  | 1.73E-01 | 3.24E+05 | 2.81E+05 | 3.35E+05 | 3.27E+05 | 3.54E+05 | 2.64E+05 | 5.77E+05 | 2.93E+05 | 4.87E+05 | 1.00E+00 | 2.18E-01 | 2.26E-01 | 0.01  | 0.53  | 0.52  |
| A0A1D3K4R6 | 5 (1)   | 37.5  | 5.33E-03 | 2.73E+04 | 3.12E+04 | 2.64E+04 | 3.49E+04 | 3.08E+04 | 3.85E+04 | 1.58E+04 | 2.38E+04 | 1.85E+04 | 1.45E-01 | 4.94E-02 | 4.40E-03 | 0.30  | -0.55 | -0.84 |
| A0A1D3K4R7 | 7 (2)   | 54.9  | 2.99E-01 | 1.91E+04 | 2.29E+04 | 2.11E+04 | 2.88E+04 | 2.70E+04 | 6.16E+04 | 2.05E+04 | 4.30E+04 | 3.59E+04 | 2.83E-01 | 5.31E-01 | 8.46E-01 | 0.90  | 0.66  | -0.24 |
| A0A1D3K4R8 | 11 (3)  | 65.4  | 1.72E-02 | 4.41E+03 | 7.67E+03 | 5.94E+03 | 1.15E+03 | 1.15E+03 | 2.83E+03 | 1.87E+03 | 2.42E+03 | 4.26E+03 | 1.66E-02 | 5.82E-02 | 5.70E-01 | -1.81 | -1.08 | 0.73  |
| A0A1D3K4S6 | 12 (5)  | 55.2  | 9.98E-03 | 2.55E+04 | 2.75E+04 | 2.59E+04 | 2.16E+04 | 1.93E+04 | 2.33E+04 | 1.93E+04 | 2.14E+04 | 2.20E+04 | 2.00E-02 | 1.30E-02 | 9.22E-01 | -0.30 | -0.33 | -0.03 |
| A0A1D3K4S9 | 15 (1)  | 104.4 | 3.87E-01 | 1.51E+05 | 1.11E+05 | 1.18E+05 | 1.03E+05 | 1.10E+05 | 7.22E+04 | 1.44E+05 | 8.89E+04 | 7.36E+04 | 3.87E-01 | 5.46E-01 | 9.45E-01 | -0.42 | -0.31 | 0.11  |
| A0A1D3K4T9 | 10 (4)  | 85.7  | 2.79E-03 | 1.69E+05 | 1.48E+05 | 1.64E+05 | 2.60E+05 | 2.64E+05 | 2.69E+05 | 1.89E+05 | 2.34E+05 | 2.58E+05 | 2.38E-03 | 2.05E-02 | 1.58E-01 | 0.73  | 0.50  | -0.22 |
| A0A1D3K4U0 | 5 (0)   | 27.7  | NA       | NA    | NA    | NA    |
| A0A1D3K4U2 | 7 (2)   | 44.0  | 6.95E-04 | 1.38E+05 | 1.08E+05 | 1.23E+05 | 2.09E+05 | 2.40E+05 | 1.92E+05 | 3.67E+05 | 2.76E+05 | 3.53E+05 | 3.35E-02 | 5.60E-04 | 1.04E-02 | 0.80  | 1.43  | 0.64  |
| A0A1D3K4U3 | 8 (1)   | 54.6  | 7.39E-01 | 1.48E+04 | 2.82E+04 | 2.03E+04 | 2.10E+04 | 1.75E+04 | 3.53E+04 | 6.02E+03 | 2.98E+04 | 1.92E+04 | 8.99E-01 | 9.35E-01 | 7.19E-01 | 0.22  | -0.20 | -0.42 |
| A0A1D3K4U4 | 2 (1)   | 6.1   | 1.03E-03 | 3.36E+03 | 2.97E+03 | 3.43E+03 | 7.10E+03 | 7.05E+03 | 6.98E+03 | 1.06E+04 | 7.44E+03 | 8.27E+03 | 6.36E-03 | 9.30E-04 | 1.46E-01 | 1.11  | 1.43  | 0.31  |
| A0A1D3K4U9 | 45 (14) | 327.2 | 1.42E-01 | 7.00E+05 | 5.96E+05 | 6.51E+05 | 4.85E+05 | 5.33E+05 | 4.43E+05 | 7.03E+05 | 5.26E+05 | 4.50E+05 | 1.25E-01 | 4.51E-01 | 5.75E-01 | -0.41 | -0.21 | 0.20  |
| A0A1D3K4V1 | 48 (17) | 296.6 | 4.95E-05 | 4.44E+05 | 3.93E+05 | 4.49E+05 | 5.00E+05 | 5.10E+05 | 4.76E+05 | 7.69E+05 | 7.09E+05 | 8.02E+05 | 1.18E-01 | 5.36E-05 | 1.94E-04 | 0.21  | 0.82  | 0.62  |
| A0A1D3K4V5 | 5 (1)   | 58.3  | NA       | NA    | NA    | NA    |
| A0A1D3K4W0 | 4 (1)   | 22.7  | 1.19E-01 | 2.30E+04 | 3.40E+04 | 2.98E+04 | 2.37E+04 | 2.20E+04 | 3.35E+04 | 1.21E+04 | 2.23E+04 | 1.93E+04 | 8.49E-01 | 1.19E-01 | 2.39E-01 | -0.13 | -0.69 | -0.56 |
| A0A1D3K4W5 | 5 (0)   | 27.0  | NA       | NA    | NA    | NA    |
| A0A1D3K4W6 | 6 (0)   | 32.6  | NA       | NA    | NA    | NA    |
| A0A1D3K4W8 | 22 (3)  | 121.4 | 7.37E-01 | 2.97E+05 | 2.79E+05 | 3.12E+05 | 2.95E+05 | 3.01E+05 | 2.71E+05 | 2.94E+05 | 2.95E+05 | 2.69E+05 | 8.54E-01 | 7.26E-01 | 9.68E-01 | -0.03 | -0.05 | -0.02 |
| A0A1D3K4X6 | 6 (1)   | 30.1  | 1.34E-02 | 2.36E+03 | 1.97E+03 | 2.19E+03 | 4.21E+03 | 5.65E+03 | 2.44E+03 | 1.10E+04 | 1.24E+04 | 5.86E+03 | 5.66E-01 | 1.31E-02 | 4.50E-02 | 0.92  | 2.17  | 1.26  |
| A0A1D3K4Y0 | 14 (4)  | 114.8 | 2.76E-01 | 1.16E+06 | 8.71E+05 | 1.09E+06 | 1.24E+06 | 1.35E+06 | 1.04E+06 | 1.20E+06 | 7.70E+05 | 8.58E+05 | 5.32E-01 | 8.04E-01 | 2.57E-01 | 0.22  | -0.14 | -0.36 |
| A0A1D3K4Z6 | 5 (1)   | 68.4  | NA       | NA    | NA    | NA    |
| A0A1D3K4Z9 | 4 (1)   | 30.2  | 1.30E-01 | 5.42E+04 | 4.76E+04 | 5.93E+04 | 4.45E+04 | 4.64E+04 | 3.48E+04 | 5.13E+04 | 3.13E+04 | 3.19E+04 | 2.60E-01 | 1.29E-01 | 8.48E-01 | -0.36 | -0.49 | -0.13 |
| A0A1D3K500 | 70 (12) | 430.3 | 6.09E-01 | 3.36E+05 | 4.35E+05 | 7.29E+05 | 3.85E+05 | 4.35E+05 | 4.13E+05 | 4.54E+05 | 4.30E+05 | 3.37E+05 | 6.72E-01 | 6.50E-01 | 9.99E-01 | -0.28 | -0.30 | -0.01 |
| A0A1D3K508 | 73 (16) | 469.6 | 2.55E-03 | 3.34E+06 | 3.25E+06 | 2.77E+06 | 1.94E+06 | 2.03E+06 | 2.33E+06 | 2.13E+06 | 2.32E+06 | 2.06E+06 | 3.61E-03 | 5.15E-03 | 9.25E-01 | -0.57 | -0.52 | 0.05  |

|            |         |       |          |          |          |          |          |          |          |          |          |          |          |          |          |       |       |       |
|------------|---------|-------|----------|----------|----------|----------|----------|----------|----------|----------|----------|----------|----------|----------|----------|-------|-------|-------|
| AOA1D3K511 | 27 (3)  | 178.7 | 6.15E-01 | 1.40E+05 | 1.11E+05 | 1.27E+05 | 1.19E+05 | 1.35E+05 | 9.65E+04 | 1.46E+05 | 8.19E+04 | 8.73E+04 | 8.97E-01 | 5.90E-01 | 8.37E-01 | -0.11 | -0.26 | -0.15 |
| AOA1D3K526 | 7 (0)   | 52.6  | NA       | NA    | NA    | NA    |
| AOA1D3K530 | 6 (1)   | 39.2  | 2.54E-01 | 1.21E+04 | 8.86E+03 | 1.23E+04 | 6.48E+03 | 7.79E+03 | 4.15E+03 | 1.25E+04 | 2.70E+03 | 9.38E+03 | 2.32E-01 | 5.55E-01 | 7.35E-01 | -0.85 | -0.44 | 0.42  |
| AOA1D3K535 | 3 (2)   | 14.8  | 1.83E-02 | 6.78E+04 | 6.99E+04 | 7.93E+04 | 8.51E+04 | 8.47E+04 | 8.97E+04 | 6.88E+04 | 7.79E+04 | 6.72E+04 | 3.28E-02 | 9.67E-01 | 2.45E-02 | 0.26  | -0.02 | -0.28 |
| AOA1D3K540 | 9 (2)   | 55.2  | 3.41E-01 | 5.52E+03 | 7.73E+03 | 4.39E+03 | 3.52E+03 | 5.17E+03 | 4.57E+03 | 5.15E+03 | 4.97E+03 | 2.53E+03 | 4.48E-01 | 3.67E-01 | 9.83E-01 | -0.41 | -0.48 | -0.07 |
| AOA1D3K541 | 3 (0)   | 15.7  | NA       | NA    | NA    | NA    |
| AOA1D3K546 | 25 (5)  | 129.5 | 3.05E-01 | 1.45E+05 | 1.48E+05 | 1.66E+05 | 1.58E+05 | 1.64E+05 | 1.90E+05 | 1.18E+05 | 1.75E+05 | 1.33E+05 | 5.86E-01 | 7.92E-01 | 2.82E-01 | 0.15  | -0.11 | -0.26 |
| AOA1D3K548 | 39 (8)  | 297.7 | 1.85E-01 | 7.67E+05 | 5.15E+05 | 6.50E+05 | 5.37E+05 | 5.67E+05 | 4.38E+05 | 8.42E+05 | 7.06E+05 | 5.73E+05 | 3.97E-01 | 7.81E-01 | 1.73E-01 | -0.33 | 0.14  | 0.46  |
| AOA1D3K549 | 2 (1)   | 8.7   | 3.38E-03 | 2.68E+02 | 6.81E+02 | 4.70E+02 | 2.63E+03 | 2.77E+03 | 2.74E+03 | 0.00E+00 | 1.67E+03 | 3.90E+02 | 4.48E-03 | 8.73E-01 | 7.32E-03 | 2.52  | 0.54  | -1.98 |
| AOA1D3K558 | 10 (2)  | 50.9  | 7.55E-05 | 3.50E+05 | 2.70E+05 | 3.37E+05 | 5.24E+05 | 5.83E+05 | 4.50E+05 | 1.12E+06 | 1.00E+06 | 1.26E+06 | 7.26E-02 | 7.49E-05 | 3.74E-04 | 0.70  | 1.82  | 1.12  |
| AOA1D3K560 | 9 (2)   | 57.0  | 9.57E-01 | 8.65E+04 | 6.47E+04 | 7.31E+04 | 7.07E+04 | 8.37E+04 | 5.74E+04 | 1.01E+05 | 3.83E+04 | 7.11E+04 | 9.67E-01 | 9.61E-01 | 1.00E+00 | -0.08 | -0.09 | -0.01 |
| AOA1D3K563 | 2 (1)   | 14.9  | 7.17E-06 | 1.89E+03 | 2.09E+03 | 2.19E+03 | 2.27E+02 | 2.65E+02 | 2.86E+02 | 1.93E+02 | 4.06E+02 | 0.00E+00 | 1.40E-05 | 1.14E-05 | 8.77E-01 | -2.99 | -3.36 | -0.38 |
| AOA1D3K565 | 4 (1)   | 25.6  | 4.24E-02 | 8.22E+02 | 5.18E+02 | 4.86E+02 | 3.19E+03 | 4.71E+03 | 3.61E+03 | 2.43E+04 | 3.75E+04 | 9.21E+04 | 9.80E-01 | 5.52E-02 | 6.99E-02 | 2.65  | 6.40  | 3.74  |
| AOA1D3K566 | 2 (0)   | 10.0  | NA       | NA    | NA    | NA    |
| AOA1D3K569 | 10 (3)  | 75.2  | 7.43E-04 | 1.27E+05 | 1.12E+05 | 1.27E+05 | 4.80E+04 | 5.81E+04 | 3.31E+04 | 7.63E+04 | 6.55E+04 | 4.57E+04 | 7.83E-04 | 2.79E-03 | 3.28E-01 | -1.39 | -0.96 | 0.43  |
| AOA1D3K571 | 4 (1)   | 45.7  | NA       | NA    | NA    | NA    |
| AOA1D3K577 | 2 (0)   | 12.8  | NA       | NA    | NA    | NA    |
| AOA1D3K578 | 14 (3)  | 100.1 | 2.34E-02 | 5.04E+05 | 4.44E+05 | 4.85E+05 | 3.93E+05 | 3.92E+05 | 3.86E+05 | 4.10E+05 | 4.04E+05 | 3.18E+05 | 4.81E-02 | 2.78E-02 | 8.93E-01 | -0.29 | -0.34 | -0.05 |
| AOA1D3K579 | 4 (0)   | 30.1  | NA       | NA    | NA    | NA    |
| AOA1D3K591 | 30 (8)  | 186.2 | 5.22E-01 | 6.48E+05 | 6.64E+05 | 7.13E+05 | 5.28E+05 | 5.77E+05 | 5.23E+05 | 1.15E+06 | 6.39E+05 | 4.51E+05 | 7.30E-01 | 9.13E-01 | 5.02E-01 | -0.32 | 0.14  | 0.46  |
| AOA1D3K596 | 3 (1)   | 15.1  | 2.49E-04 | 4.16E+04 | 3.43E+04 | 3.80E+04 | 9.74E+03 | 1.52E+04 | 4.60E+03 | 1.09E+04 | 9.50E+03 | 3.46E+03 | 5.31E-04 | 3.71E-04 | 8.60E-01 | -1.95 | -2.26 | -0.31 |
| AOA1D3K5A5 | 5 (1)   | 48.6  | NA       | NA    | NA    | NA    |
| AOA1D3K5A9 | 4 (1)   | 20.4  | 1.59E-02 | 5.87E+04 | 4.79E+04 | 5.69E+04 | 2.66E+04 | 3.35E+04 | 1.79E+04 | 3.55E+04 | 2.93E+04 | 8.97E+03 | 2.74E-02 | 2.23E-02 | 9.83E-01 | -1.07 | -1.15 | -0.08 |
| AOA1D3K588 | 14 (1)  | 105.9 | 3.79E-04 | 2.53E+03 | 5.22E+03 | 2.93E+03 | 4.69E+02 | 7.82E+02 | 1.15E+03 | 9.85E+03 | 1.12E+04 | 1.44E+04 | 1.67E-01 | 1.79E-03 | 3.74E-04 | -4.99 | 2.00  | 6.98  |
| AOA1D3K5C8 | 2 (1)   | 11.1  | 1.19E-02 | 1.19E+04 | 1.32E+04 | 1.24E+04 | 1.01E+04 | 9.32E+03 | 1.02E+04 | 1.25E+04 | 1.27E+04 | 1.08E+04 | 1.29E-02 | 7.20E-01 | 3.17E-02 | -0.34 | -0.06 | 0.28  |
| AOA1D3K5D1 | 12 (3)  | 61.5  | NA       | NA    | NA    | NA    |
| AOA1D3K5D5 | 16 (5)  | 111.9 | 1.13E-02 | 8.93E+05 | 7.37E+05 | 8.62E+05 | 9.71E+05 | 1.03E+06 | 8.45E+05 | 1.15E+06 | 1.08E+06 | 1.10E+06 | 2.13E-01 | 9.39E-03 | 8.83E-02 | 0.19  | 0.42  | 0.23  |
| AOA1D3K5D8 | 21 (10) | 156.5 | 6.14E-04 | 2.50E+05 | 3.37E+05 | 2.98E+05 | 1.15E+05 | 1.28E+05 | 1.41E+05 | 1.08E+05 | 1.33E+05 | 7.38E+04 | 1.57E-03 | 7.85E-04 | 6.63E-01 | -1.20 | -1.49 | -0.29 |
| AOA1D3K5F0 | 3 (2)   | 21.2  | 1.90E-02 | 2.56E+04 | 1.65E+04 | 1.99E+04 | 4.70E+04 | 4.63E+04 | 4.55E+04 | 2.98E+04 | 5.38E+04 | 5.72E+04 | 3.07E-02 | 2.77E-02 | 9.96E-01 | 1.16  | 1.18  | 0.02  |
| AOA1D3K5G0 | 11 (5)  | 99.7  | 2.12E-03 | 2.83E+05 | 2.17E+05 | 2.62E+05 | 4.24E+05 | 4.47E+05 | 3.80E+05 | 3.23E+05 | 3.45E+05 | 3.75E+05 | 1.73E-03 | 2.47E-02 | 7.95E-02 | 0.72  | 0.45  | -0.26 |
| AOA1D3K5H0 | 8 (2)   | 57.0  | 3.03E-01 | 1.24E+04 | 1.93E+04 | 1.08E+04 | 1.81E+04 | 2.34E+04 | 2.19E+04 | 1.14E+04 | 2.41E+04 | 2.52E+04 | 3.27E-01 | 4.09E-01 | 9.80E-01 | 0.57  | 0.51  | -0.06 |
| AOA1D3K5I5 | 18 (2)  | 110.7 | 2.95E-02 | 2.12E+04 | 1.84E+04 | 2.34E+04 | 1.79E+04 | 1.94E+04 | 1.32E+04 | 1.58E+04 | 9.42E+03 | 9.34E+03 | 3.10E-01 | 2.48E-02 | 1.84E-01 | -0.32 | -0.87 | -0.55 |
| AOA1D3K5J1 | 2 (0)   | 10.1  | NA       | NA    | NA    | NA    |
| AOA1D3K5K2 | 7 (3)   | 38.2  | 2.74E-01 | 1.11E+05 | 1.25E+05 | 1.18E+05 | 1.11E+05 | 9.92E+04 | 1.36E+05 | 1.01E+05 | 1.09E+05 | 9.29E+04 | 9.62E-01 | 2.89E-01 | 3.95E-01 | -0.03 | -0.22 | -0.19 |
| AOA1D3K5K4 | 10 (2)  | 73.7  | 1.68E-01 | 1.61E+04 | 1.26E+04 | 1.36E+04 | 1.11E+04 | 1.17E+04 | 6.66E+03 | 1.41E+04 | 1.30E+04 | 9.31E+03 | 1.49E-01 | 5.94E-01 | 5.02E-01 | -0.52 | -0.22 | 0.30  |
| AOA1D3K5K5 | 6 (0)   | 29.3  | NA       | NA    | NA    | NA    |
| AOA1D3K5L2 | 27 (9)  | 240.8 | 1.88E-04 | 6.09E+05 | 4.93E+05 | 5.68E+05 | 8.86E+05 | 9.78E+05 | 9.50E+05 | 1.83E+06 | 1.40E+06 | 1.66E+06 | 3.05E-02 | 1.60E-04 | 1.78E-03 | 0.75  | 1.55  | 0.80  |
| AOA1D3K5L4 | 3 (1)   | 24.7  | 3.55E-03 | 8.40E+04 | 5.56E+04 | 8.45E+04 | 1.27E+05 | 1.53E+05 | 9.96E+04 | 3.03E+05 | 1.89E+05 | 2.97E+05 | 3.39E-01 | 3.37E-03 | 1.58E-02 | 0.76  | 1.82  | 1.06  |
| AOA1D3K5L7 | 3 (1)   | 17.7  | 3.25E-01 | 5.65E+03 | 3.28E+03 | 2.38E+03 | 3.11E+03 | 6.06E+03 | 4.42E+03 | 1.87E+03 | 3.60E+03 | 2.53E+03 | 7.88E-01 | 6.19E-01 | 3.00E-01 | 0.27  | -0.50 | -0.76 |
| AOA1D3K5L8 | 21 (5)  | 166.8 | 1.54E-03 | 2.88E+05 | 2.70E+05 | 3.10E+05 | 3.48E+05 | 3.75E+05 | 3.43E+05 | 2.55E+05 | 2.55E+05 | 2.78E+05 | 7.79E-03 | 2.31E-01 | 1.44E-03 | 0.30  | -0.14 | -0.44 |
| AOA1D3K5L9 | 4 (0)   | 27.9  | NA       | NA    | NA    | NA    |
| AOA1D3K5M3 | 3 (1)   | 16.6  | 6.72E-01 | 1.67E+05 | 1.95E+05 | 1.87E+05 | 1.90E+05 | 1.79E+05 | 2.38E+05 | 1.66E+05 | 2.59E+05 | 1.95E+05 | 7.67E-01 | 6.80E-01 | 9.87E-01 | 0.15  | 0.18  | 0.03  |
| AOA1D3K5M7 | 2 (0)   | 9.5   | NA       | NA    | NA    | NA    |
| AOA1D3K5N7 | 2 (0)   | 5.7   | NA       | NA    | NA    | NA    |
| AOA1D3K5N9 | 14 (3)  | 56.3  | NA       | NA    | NA    | NA    |
| AOA1D3K5P0 | 3 (0)   | 22.2  | NA       | NA    | NA    | NA    |
| AOA1D3K5P2 | 15 (5)  | 94.4  | 1.08E-02 | 4.06E+05 | 3.75E+05 | 4.38E+05 | 4.54E+05 | 4.34E+05 | 4.71E+05 | 5.03E+05 | 5.37E+05 | 6.17E+05 | 3.81E-01 | 9.71E-03 | 5.02E-02 | 0.16  | 0.44  | 0.29  |
| AOA1D3K5P5 | 8 (2)   | 47.4  | 7.36E-02 | 6.41E+04 | 4.48E+04 | 5.66E+04 | 3.75E+04 | 3.91E+04 | 3.11E+04 | 5.63E+04 | 3.96E+04 | 4.07E+04 | 6.28E-02 | 3.81E-01 | 3.79E-01 | -0.62 | -0.28 | 0.34  |
| AOA1D3K5Q0 | 14 (5)  | 84.0  | 3.34E-01 | 1.63E+05 | 1.69E+05 | 1.90E+05 | 1.53E+05 | 1.57E+05 | 1.44E+05 | 2.26E+05 | 1.87E+05 | 1.42E+05 | 5.66E-01 | 8.61E-01 | 3.17E-01 | -0.20 | 0.09  | 0.29  |
| AOA1D3K5Q1 | 3 (1)   | 22.3  | 9.12E-02 | 4.79E+04 | 3.67E+04 | 4.34E+04 | 4.36E+04 | 5.08E+04 | 3.26E+04 | 6.88E+04 | 6.42E+04 | 4.69E+04 | 9.99E-01 | 1.28E-01 | 1.21E-01 | -0.01 | 0.49  | 0.50  |
| AOA1D3K5R1 | 3 (1)   | 10.7  | 4.89E-05 | 1.50E+05 | 9.53E+04 | 1.02E+05 | 1.40E+06 | 1.74E+06 | 1.22E+06 | 2.66E+06 | 3.02E+06 | 3.49E+06 | 3.04E-03 | 3.85E-05 | 1.15E-03 | 3.65  | 4.72  | 1.08  |
| AOA1D3K5R3 | 5 (1)   | 42.0  | 1.19E-01 | 1.13E+04 | 8.50E+03 | 9.41E+03 | 7.13E+03 | 7.75E+03 | 5.02E+03 | 8.96E+03 | 7.67E+03 | 5.17E+03 | 1.23E-01 | 2.25E-01 | 8.84E-01 | -0.55 | -0.42 | 0.13  |

|            |         |       |          |          |          |          |          |          |          |          |          |          |          |          |          |       |       |       |
|------------|---------|-------|----------|----------|----------|----------|----------|----------|----------|----------|----------|----------|----------|----------|----------|-------|-------|-------|
| A0A1D3K5R5 | 5 (2)   | 29.7  | 6.12E-01 | 4.44E+02 | 8.55E+03 | 9.98E+02 | 1.49E+03 | 8.67E+02 | 1.60E+04 | 1.11E+02 | 1.75E+03 | 2.32E+03 | 8.21E-01 | 9.09E-01 | 5.88E-01 | 0.88  | -1.26 | -2.14 |
| A0A1D3K5S1 | 4 (1)   | 14.3  | 1.37E-03 | 4.15E+04 | 3.27E+04 | 3.65E+04 | 3.29E+04 | 3.37E+04 | 3.72E+04 | 8.07E+04 | 8.03E+04 | 1.14E+05 | 9.67E-01 | 2.60E-03 | 2.10E-03 | -0.09 | 1.31  | 1.40  |
| A0A1D3K5S6 | 5 (1)   | 42.4  | 5.61E-05 | 2.57E+03 | 2.48E+03 | 2.47E+03 | 1.91E+03 | 1.89E+03 | 1.36E+03 | 6.76E+02 | 4.67E+02 | 6.23E+02 | 5.87E-03 | 4.53E-05 | 8.80E-04 | -0.54 | -2.09 | -1.55 |
| A0A1D3K5S7 | 2 (1)   | 13.8  | 6.53E-01 | 4.51E+03 | 3.31E+03 | 2.96E+03 | 2.55E+03 | 3.77E+03 | 1.60E+03 | 2.84E+03 | 7.84E+03 | 1.90E+03 | 8.34E-01 | 9.30E-01 | 6.32E-01 | -0.44 | 0.22  | 0.67  |
| A0A1D3K5T3 | 13 (2)  | 42.5  | NA       | NA    | NA    | NA    |
| A0A1D3K5U2 | 13 (2)  | 72.9  | 1.17E-05 | 2.27E+04 | 2.24E+04 | 2.37E+04 | 1.65E+04 | 1.59E+04 | 1.70E+04 | 1.18E+04 | 1.36E+04 | 1.15E+04 | 1.73E-04 | 9.05E-06 | 1.82E-03 | -0.47 | -0.90 | -0.42 |
| A0A1D3K5U9 | 2 (0)   | 10.4  | NA       | NA    | NA    | NA    |
| A0A1D3K5Y5 | 5 (2)   | 30.4  | 1.70E-04 | 7.79E+03 | 6.56E+03 | 7.53E+03 | 1.61E+04 | 1.76E+04 | 1.02E+04 | 3.35E+04 | 2.74E+04 | 3.12E+04 | 4.89E-02 | 1.53E-04 | 1.21E-03 | 1.00  | 2.07  | 1.07  |
| A0A1D3K5Z6 | 5 (3)   | 26.9  | 1.79E-02 | 2.62E+04 | 2.44E+04 | 2.83E+04 | 3.24E+04 | 3.19E+04 | 3.49E+04 | 2.82E+04 | 3.27E+04 | 2.94E+04 | 1.49E-02 | 1.30E-01 | 2.49E-01 | 0.33  | 0.19  | -0.13 |
| A0A1D3K5Z7 | 22 (8)  | 197.8 | 8.09E-04 | 3.51E+05 | 3.47E+05 | 3.31E+05 | 5.58E+05 | 5.65E+05 | 6.02E+05 | 4.62E+05 | 5.75E+05 | 5.70E+05 | 9.28E-04 | 2.49E-03 | 4.89E-01 | 0.75  | 0.64  | -0.10 |
| A0A1D3K5Z8 | 3 (0)   | 26.0  | NA       | NA    | NA    | NA    |
| A0A1D3K607 | 9 (1)   | 49.0  | 9.32E-01 | 5.91E+04 | 7.15E+04 | 7.75E+04 | 6.75E+04 | 6.58E+04 | 6.87E+04 | 6.86E+04 | 8.11E+04 | 5.96E+04 | 9.53E-01 | 9.98E-01 | 9.35E-01 | -0.04 | 0.01  | 0.05  |
| A0A1D3K616 | 5 (1)   | 33.8  | 1.51E-02 | 2.35E+04 | 2.04E+04 | 2.16E+04 | 8.32E+03 | 9.75E+03 | 6.97E+03 | 1.25E+04 | 1.65E+04 | 2.54E+04 | 1.45E-02 | 5.39E-01 | 5.35E-02 | -1.38 | -0.26 | 1.12  |
| A0A1D3K628 | 2 (1)   | 43.3  | NA       | NA    | NA    | NA    |
| A0A1D3K635 | 7 (0)   | 39.2  | NA       | NA    | NA    | NA    |
| A0A1D3K642 | 4 (0)   | 23.8  | NA       | NA    | NA    | NA    |
| A0A1D3K653 | 4 (1)   | 20.2  | 7.47E-02 | 2.47E+04 | 2.16E+04 | 2.68E+04 | 2.43E+04 | 2.80E+04 | 2.32E+04 | 1.66E+04 | 2.27E+04 | 1.82E+04 | 9.41E-01 | 1.31E-01 | 8.58E-02 | 0.04  | -0.35 | -0.39 |
| A0A1D3K654 | 16 (2)  | 88.5  | 5.70E-03 | 1.82E+05 | 1.71E+05 | 1.96E+05 | 1.95E+05 | 1.98E+05 | 1.90E+05 | 2.36E+05 | 2.45E+05 | 2.92E+05 | 7.46E-01 | 6.64E-03 | 1.45E-02 | 0.09  | 0.49  | 0.41  |
| A0A1D3K666 | 2 (0)   | 13.0  | NA       | NA    | NA    | NA    |
| A0A1D3K671 | 12 (2)  | 91.8  | 5.89E-02 | 1.27E+05 | 1.12E+05 | 1.09E+05 | 7.59E+04 | 8.49E+04 | 6.30E+04 | 1.18E+05 | 9.34E+04 | 6.91E+04 | 5.01E-02 | 2.97E-01 | 3.92E-01 | -0.64 | -0.31 | 0.33  |
| A0A1D3K673 | 17 (4)  | 101.1 | 8.07E-01 | 6.14E+05 | 4.98E+05 | 5.71E+05 | 5.51E+05 | 5.88E+05 | 4.35E+05 | 6.39E+05 | 4.84E+05 | 4.29E+05 | 8.66E-01 | 8.14E-01 | 9.94E-01 | -0.10 | -0.12 | -0.02 |
| A0A1D3K674 | 5 (3)   | 29.0  | 7.53E-02 | 3.99E+05 | 3.96E+05 | 4.59E+05 | 2.97E+05 | 3.22E+05 | 3.05E+05 | 3.90E+05 | 3.11E+05 | 2.16E+05 | 1.08E-01 | 1.01E-01 | 9.98E-01 | -0.44 | -0.45 | -0.01 |
| A0A1D3K679 | 2 (1)   | 5.0   | 2.89E-03 | 3.90E+03 | 3.12E+03 | 3.70E+03 | 1.51E+03 | 1.67E+03 | 1.21E+03 | 3.38E+03 | 3.15E+03 | 2.24E+03 | 2.62E-03 | 2.42E-01 | 1.58E-02 | -1.29 | -0.29 | 1.00  |
| A0A1D3K684 | 3 (0)   | 22.1  | NA       | NA    | NA    | NA    |
| A0A1D3K692 | 2 (0)   | 10.2  | NA       | NA    | NA    | NA    |
| A0A1D3K696 | 3 (1)   | 52.5  | NA       | NA    | NA    | NA    |
| A0A1D3K699 | 6 (1)   | 46.6  | 3.51E-03 | 1.75E+05 | 1.43E+05 | 1.68E+05 | 2.26E+05 | 2.36E+05 | 2.05E+05 | 2.25E+05 | 2.12E+05 | 2.35E+05 | 6.20E-03 | 5.48E-03 | 9.91E-01 | 0.46  | 0.47  | 0.01  |
| A0A1D3K6A1 | 19 (8)  | 134.3 | 9.06E-01 | 2.66E+05 | 2.21E+05 | 2.48E+05 | 2.57E+05 | 2.65E+05 | 2.14E+05 | 3.18E+05 | 2.48E+05 | 2.06E+05 | 1.00E+00 | 9.19E-01 | 9.24E-01 | 0.00  | 0.07  | 0.07  |
| A0A1D3K6A5 | 10 (4)  | 62.2  | 6.72E-03 | 9.51E+05 | 7.66E+05 | 9.41E+05 | 5.67E+05 | 5.86E+05 | 4.71E+05 | 7.13E+05 | 5.41E+05 | 5.62E+05 | 7.36E-03 | 1.90E-02 | 6.67E-01 | -0.71 | -0.55 | 0.16  |
| A0A1D3K6A7 | 4 (2)   | 22.2  | 4.04E-04 | 1.99E+04 | 1.28E+04 | 1.65E+04 | 4.01E+04 | 4.21E+04 | 3.50E+04 | 3.82E+04 | 3.24E+04 | 3.80E+04 | 5.13E-04 | 1.07E-03 | 6.02E-01 | 1.25  | 1.14  | -0.11 |
| A0A1D3K6A9 | 5 (1)   | 30.2  | 5.27E-01 | 4.49E+02 | 3.17E+03 | 6.81E+02 | 1.09E+03 | 3.21E+02 | 3.11E+03 | 6.19E+02 | 3.10E+02 | 4.25E+02 | 9.97E-01 | 6.06E-01 | 5.65E-01 | 0.07  | -1.67 | -1.74 |
| A0A1D3K6E1 | 2 (0)   | 10.9  | NA       | NA    | NA    | NA    |
| A0A1D3K6E4 | 6 (1)   | 49.1  | 2.06E-01 | 3.22E+03 | 6.91E+03 | 4.63E+03 | 2.46E+03 | 2.26E+03 | 5.70E+03 | 8.22E+02 | 3.22E+03 | 2.24E+03 | 5.79E-01 | 1.84E-01 | 6.06E-01 | -0.50 | -1.23 | -0.73 |
| A0A1D3K6E7 | 4 (0)   | 21.8  | NA       | NA    | NA    | NA    |
| A0A1D3K6F2 | 4 (1)   | 20.8  | 1.40E-03 | 6.69E+03 | 5.99E+03 | 7.22E+03 | 2.61E+03 | 1.93E+03 | 1.65E+03 | 3.48E+03 | 1.30E+03 | 6.94E+02 | 2.73E-03 | 2.10E-03 | 9.51E-01 | -1.68 | -1.86 | -0.18 |
| A0A1D3K6H5 | 6 (1)   | 48.5  | NA       | NA    | NA    | NA    |
| A0A1D3K6I0 | 14 (3)  | 100.3 | 8.76E-02 | 2.00E+05 | 1.71E+05 | 1.90E+05 | 1.37E+05 | 1.41E+05 | 1.15E+05 | 1.86E+05 | 1.40E+05 | 1.04E+05 | 8.92E-02 | 1.84E-01 | 8.41E-01 | -0.51 | -0.38 | 0.13  |
| A0A1D3K6L5 | 3 (0)   | 16.3  | NA       | NA    | NA    | NA    |
| A0A1D3K6M0 | 2 (0)   | 10.6  | NA       | NA    | NA    | NA    |
| A0A1D3K6N0 | 6 (1)   | 35.5  | 4.35E-02 | 1.35E+03 | 2.77E+03 | 1.37E+03 | 3.13E+03 | 2.79E+03 | 2.69E+03 | 3.17E+03 | 3.09E+03 | 4.33E+03 | 1.89E-01 | 3.78E-02 | 4.55E-01 | 0.65  | 0.95  | 0.30  |
| A0A1D3K6N5 | 29 (5)  | 236.0 | 1.33E-01 | 4.19E+05 | 4.23E+05 | 4.73E+05 | 4.95E+05 | 4.98E+05 | 5.36E+05 | 4.07E+05 | 5.11E+05 | 4.67E+05 | 1.23E-01 | 7.30E-01 | 3.25E-01 | 0.22  | 0.08  | -0.14 |
| A0A1D3K6Q5 | 4 (0)   | 29.3  | NA       | NA    | NA    | NA    |
| A0A1D3K6Q6 | 34 (13) | 258.5 | 1.43E-02 | 1.38E+06 | 1.25E+06 | 1.31E+06 | 1.34E+06 | 1.43E+06 | 1.37E+06 | 1.20E+06 | 1.16E+06 | 1.00E+06 | 5.35E-01 | 5.09E-02 | 1.37E-02 | 0.08  | -0.23 | -0.30 |
| A0A1D3K6R9 | 17 (7)  | 121.9 | 2.57E-01 | 1.90E+04 | 4.14E+04 | 2.00E+04 | 3.67E+04 | 3.34E+04 | 6.59E+04 | 1.26E+04 | 3.71E+04 | 2.78E+04 | 3.29E-01 | 9.96E-01 | 2.99E-01 | 0.76  | -0.05 | -0.81 |
| A0A1D3K6U7 | 9 (6)   | 67.5  | 8.05E-01 | 4.83E+05 | 3.33E+05 | 4.14E+05 | 3.98E+05 | 4.17E+05 | 3.16E+05 | 5.08E+05 | 4.00E+05 | 3.34E+05 | 8.52E-01 | 9.98E-01 | 8.20E-01 | -0.12 | 0.01  | 0.13  |
| A0A1D3K6V4 | 4 (0)   | 56.7  | NA       | NA    | NA    | NA    |
| A0A1D3K6V8 | 15 (2)  | 58.4  | NA       | NA    | NA    | NA    |
| A0A1D3K6V9 | 11 (3)  | 58.3  | 4.70E-01 | 6.27E+04 | 6.81E+04 | 7.44E+04 | 6.14E+04 | 6.04E+04 | 7.37E+04 | 7.38E+04 | 8.04E+04 | 6.43E+04 | 8.48E-01 | 7.44E-01 | 4.42E-01 | -0.07 | 0.09  | 0.16  |
| A0A1D3K6X1 | 2 (0)   | 9.6   | NA       | NA    | NA    | NA    |
| A0A1D3K710 | 2 (0)   | 14.4  | NA       | NA    | NA    | NA    |
| A0A1D3K723 | 2 (0)   | 9.7   | NA       | NA    | NA    | NA    |
| A0A1D3K730 | 7 (2)   | 53.9  | 1.22E-02 | 7.81E+04 | 8.01E+04 | 7.57E+04 | 9.60E+04 | 9.83E+04 | 1.01E+05 | 1.10E+05 | 1.29E+05 | 1.62E+05 | 3.09E-01 | 1.05E-02 | 6.88E-02 | 0.34  | 0.78  | 0.44  |

[illegible]

[illegible]

**Supplementary Table S4. Annotations of identified and quantified proteins of *P. veronii*** . Matched against *Pseudomonas veronii* 1YdBTEX2 reference strain. Functional distribution: C-Energy production and conversion; D-Cell cycle control, cell division, chromosome partitioning; E-Amino acid metabolism and transport; F-Nucleotide metabolism and transport; H-Coenzyme transport and metabolism; I-Lipid transport and metabolism; K-Transcription; M-Cell wall/membrane/envelop biogenesis; N-Cell motility; O-Post-translational modification, protein turnover, and chaperone functions; P-Inorganic ion transport and metabolism; Q-Secondary metabolites biosynthesis, transport, and catabolism; T-Signal transduction mechanisms; U-Intracellular trafficking, secretion, and vesicular transport; V-Defense mechanisms; S-Function unknown; MX-Multiple functions (more than 3). Localization: CY-cytoplasm; IM-inner membrane; PR-periplasm; OM-outer membrane; EX-extracellular; UK-unknown; ML-multiple localizations. Y - identified.

| UNIPROT<br>Accession | Protein name                                                                                      | Identified in |            |            | MW [Da]  | pI     | Localizati<br>SOSUIGra<br>mN | PSORTb     | Function<br>COGS |
|----------------------|---------------------------------------------------------------------------------------------------|---------------|------------|------------|----------|--------|------------------------------|------------|------------------|
|                      |                                                                                                   | Control       | Exp_15days | Exp_30days |          |        |                              |            |                  |
| A0A1D3JPF4           | Beta sliding clamp OS= <i>Pseudomonas veronii</i> 1YdBTEX2                                        | Y             | Y          | Y          | 40518    | 4.9043 | CY                           | CY         | L                |
| A0A1D3JPI1           | Glycine/betaine ABC transporter substrate-binding protein OS= <i>Pseudomonas veronii</i> 1YdBTEX2 |               | Y          |            | 33114    | 5.5752 | CY                           | CY         | ET               |
| A0A1D3JPJ0           | Hypothetical membrane protein OS= <i>Pseudomonas veronii</i> 1YdBTEX2                             | Y             | Y          |            | 11711    | 7.396  | CY                           | UK         | T                |
| A0A1D3JPK6           | Cytochrome c oxidase subunit 2 OS= <i>Pseudomonas veronii</i> 1YdBTEX2                            | Y             | Y          | Y          | 38671.82 | 6.23   | IM                           | ML (C, IM) | C                |
| A0A1D3JPL1           | Peroxiredoxin OsmC OS= <i>Pseudomonas veronii</i> 1YdBTEX2                                        | Y             | Y          | Y          | 14856    | 5.1709 | CY                           | CY         | O                |
| A0A1D3JPL2           | DNA gyrase subunit B OS= <i>Pseudomonas veronii</i> 1YdBTEX2                                      | Y             | Y          | Y          | 90406.19 | 5.52   | CY                           | CY         | L                |
| A0A1D3JPL6           | Probable D-methionine-binding lipoprotein MetQ OS= <i>Pseudomonas veronii</i> 1YdBTEX2            | Y             | Y          | Y          | 27869    | 7.8135 | PR                           | IM         | P                |
| A0A1D3JPN3           | Ferric uptake regulation protein OS= <i>Pseudomonas veronii</i> 1YdBTEX2                          |               |            | Y          | 17321    | 6.583  | CY                           | CY         | P                |
| A0A1D3JPP4           | Short-chain dehydrogenase OS= <i>Pseudomonas veronii</i> 1YdBTEX2                                 | Y             | Y          | Y          | 26581    | 6.4263 | CY                           | CY         | IQ               |
| A0A1D3JPP9           | Cytochrome c4 OS= <i>Pseudomonas veronii</i> 1YdBTEX2                                             |               | Y          |            | 20884    | 7.2891 | PR                           | PR         | C                |
| A0A1D3JPQ0           | ABC transporter permease OS= <i>Pseudomonas veronii</i> 1YdBTEX2                                  |               |            | Y          | 33575    | 7.8237 | OM                           | UK         | QT               |
| A0A1D3JPQ1           | Cytochrome P450 OS= <i>Pseudomonas veronii</i> 1YdBTEX2                                           |               | Y          | Y          | 44493    | 5.6118 | CY                           | CY         | CQ               |
| A0A1D3JPQ6           | Shikimate dehydrogenase (NADP(+)) OS= <i>Pseudomonas veronii</i> 1YdBTEX2                         |               |            | Y          | 29089    | 4.8405 | CY                           | CY         | EH               |

|            |                                                                                    |   |   |   |          |        |    |    |        |
|------------|------------------------------------------------------------------------------------|---|---|---|----------|--------|----|----|--------|
| A0A1D3JPR1 | Glycine--tRNA ligase alpha subunit OS=Pseudomonas veronii 1YdBTEX2                 | Y | Y | Y | 36210    | 4.749  | UK | CY | J      |
| A0A1D3JPR5 | Thiol:disulfide interchange protein OS=Pseudomonas veronii 1YdBTEX2                | Y |   |   | 22935    | 7.3125 | PR | PR | CQ     |
| A0A1D3JPS1 | Methyl-accepting chemotaxis protein PctA OS=Pseudomonas veronii 1YdBTEX2           | Y |   |   | 68696    | 4.8809 | IM | IM | NT(mx) |
| A0A1D3JPS8 | LysR family transcriptional regulator OS=Pseudomonas veronii 1YdBTEX2              |   |   | Y | 33973    | 6.7852 | CY | CY | K      |
| A0A1D3JPT2 | D-galactonate dehydratase OS=Pseudomonas veronii 1YdBTEX2                          | Y | Y | Y | 42130    | 5.0024 | CY | CY | M      |
| A0A1D3JPT7 | Taurine dioxygenase OS=Pseudomonas veronii 1YdBTEX2                                | Y |   |   | 33467    | 6.5186 | CY | CY | Q      |
| A0A1D3JPT9 | Transporter OS=Pseudomonas veronii 1YdBTEX2                                        | Y |   | Y | 55429.58 | 6.3    | PR | UK | MU     |
| A0A1D3JPU4 | Glutaryl-CoA dehydrogenase_ mitochondrial OS=Pseudomonas veronii 1YdBTEX2          | Y | Y | Y | 43127    | 5.9297 | CY | CY | IC     |
| A0A1D3JPU5 | Glycine--tRNA ligase beta subunit OS=Pseudomonas veronii 1YdBTEX2                  | Y | Y |   | 74930    | 5.2134 | CY | CY | J      |
| A0A1D3JPU8 | Uncharacterized protein OS=Pseudomonas veronii 1YdBTEX2                            | Y | Y | Y | 52599    | 4.7754 | IM | IM | S      |
| A0A1D3JPX3 | Catalase OS=Pseudomonas veronii 1YdBTEX2                                           | Y | Y | Y | 78223    | 6.4277 | CY | CY | C      |
| A0A1D3JPY5 | Hypothetical secreted protein OS=Pseudomonas veronii 1YdBTEX2                      | Y | Y | Y | 9128.72  | 4.96   | UK | UK | M      |
| A0A1D3JPY6 | Curli production assembly/transport component CsgG OS=Pseudomonas veronii 1YdBTEX2 |   | Y | Y | 24045    | 9.3105 | OM | UK | M      |
| A0A1D3JPY9 | 5-aminovalerate aminotransferase DavT OS=Pseudomonas veronii 1YdBTEX2              | Y |   | Y | 44808    | 6.0176 | CY | CY | EH(mx) |
| A0A1D3JPZ3 | Membrane protein OS=Pseudomonas veronii 1YdBTEX2                                   | Y | Y | Y | 88292.62 | 5.31   | OM | OM | NU(mx) |
| A0A1D3JPZ6 | Succinate--hydroxymethylglutarate CoA-transferase OS=Pseudomonas veronii 1YdBTEX2  | Y | Y | Y | 43230    | 5.5151 | CY | CY | C      |
| A0A1D3JQ04 | L-glyceraldehyde 3-phosphate reductase OS=Pseudomonas veronii 1YdBTEX2             | Y | Y |   | 37980.77 | 6.2    | CY | CY | C      |
| A0A1D3JQ11 | Butanediol dehydrogenase OS=Pseudomonas veronii 1YdBTEX2                           |   | Y | Y | 38566    | 5.6162 | UK | CY | CE(mx) |

|            |                                                                                     |   |   |   |          |        |    |            |        |
|------------|-------------------------------------------------------------------------------------|---|---|---|----------|--------|----|------------|--------|
| A0A1D3JQ20 | Transcriptional regulatory protein OmpR OS=Pseudomonas veronii 1YdBTEX2             | Y |   | Y | 27327    | 5.5371 | CY | CY         | KT     |
| A0A1D3JQ23 | Serine O-acetyltransferase OS=Pseudomonas veronii 1YdBTEX2                          | Y | Y | Y | 33408.43 | 6.15   | CY | CY         | EQ     |
| A0A1D3JQ27 | Cystine-binding periplasmic protein OS=Pseudomonas veronii 1YdBTEX2                 | Y | Y | Y | 28611    | 9.271  | CY | PR         | ET     |
| A0A1D3JQ35 | Haemagg_act domain-containing protein OS=Pseudomonas veronii 1YdBTEX2               | Y | Y | Y | 237969.4 | 5.73   | OM | ML (Ex, OM | UT(mx) |
| A0A1D3JQ49 | Probable D-methionine-binding lipoprotein MetQ OS=Pseudomonas veronii 1YdBTEX2      | Y | Y | Y | 25944.02 | 6.96   | PR | IM         | P      |
| A0A1D3JQ52 | Alpha-ketoglutarate-dependent taurine dioxygenase OS=Pseudomonas veronii 1YdBTEX2   | Y |   |   | 31131    | 5.7656 | CY | CY         | Q      |
| A0A1D3JQ54 | Uncharacterized protein OS=Pseudomonas veronii 1YdBTEX2                             |   | Y |   | 28458.57 | 5.82   | CY | CY         | H      |
| A0A1D3JQ60 | Uncharacterized protein OS=Pseudomonas veronii 1YdBTEX2                             | Y |   |   | 16406.15 | 5.3    | EX | UK         | X      |
| A0A1D3JQ61 | Glucose-1-phosphate thymidyltransferase OS=Pseudomonas veronii 1YdBTEX2             | Y | Y | Y | 32222    | 5.0479 | IM | CY         | JM     |
| A0A1D3JQ62 | Peptidoglycan-binding protein LysM OS=Pseudomonas veronii 1YdBTEX2                  | Y | Y | Y | 15612    | 5.2266 | CY | UK         | NUD    |
| A0A1D3JQ68 | Glutarate-semialdehyde dehydrogenase DavD OS=Pseudomonas veronii 1YdBTEX2           | Y | Y | Y | 51524    | 5.4873 | CY | CY         | C      |
| A0A1D3JQ71 | dTDP-glucose 4_6-dehydratase OS=Pseudomonas veronii 1YdBTEX2                        | Y | Y | Y | 40098    | 5.2251 | CY | CY         | MG     |
| A0A1D3JQ78 | Sulfate/thiosulfate import ATP-binding protein CysA OS=Pseudomonas veronii 1YdBTEX2 | Y | Y | Y | 36633.05 | 6.1    | CY | IM         | PQ(mx) |
| A0A1D3JQ85 | Amino acid ABC transporter OS=Pseudomonas veronii 1YdBTEX2                          | Y | Y | Y | 27708    | 5.2778 | EX | PR         | ET     |
| A0A1D3JQ86 | D-cysteine desulfhydrase OS=Pseudomonas veronii 1YdBTEX2                            |   | Y |   | 35083    | 4.6743 | CY | CY         | E      |
| A0A1D3JQ87 | Cell envelope biogenesis protein AsmA OS=Pseudomonas veronii 1YdBTEX2               | Y | Y |   | 79821.25 | 6.41   | IM | OM         | MD     |

|            |                                                                                             |   |   |   |          |        |    |    |        |
|------------|---------------------------------------------------------------------------------------------|---|---|---|----------|--------|----|----|--------|
| A0A1D3JQA3 | Uncharacterized protein OS=Pseudomonas veronii 1YdBTEX2                                     | Y |   |   | 16484    | 8.9458 | UK | UK | S      |
| A0A1D3JQA5 | Carboxy-terminal-processing protease OS=Pseudomonas veronii 1YdBTEX2                        |   | Y |   | 46345    | 5.7466 | UK | IM | MO     |
| A0A1D3JQA7 | Phosphoenolpyruvate carboxykinase (ATP) OS=Pseudomonas veronii 1YdBTEX2                     | Y | Y |   | 55316    | 5.1753 | UK | CY | H      |
| A0A1D3JQB0 | Glutamine synthetase OS=Pseudomonas veronii 1YdBTEX2                                        | Y | Y | Y | 51647    | 4.9526 | CY | CY | E      |
| A0A1D3JQB2 | Porin D OS=Pseudomonas veronii 1YdBTEX2                                                     | Y | Y | Y | 46511    | 6.1582 | OM | OM | S      |
| A0A1D3JQC6 | TetR family transcriptional regulator OS=Pseudomonas veronii 1YdBTEX2                       | Y | Y |   | 20041    | 5.2046 | CY | CY | K      |
| A0A1D3JQD1 | Histidine ammonia-lyase OS=Pseudomonas veronii 1YdBTEX2                                     | Y | Y | Y | 53882    | 5.3525 | UK | CY | E      |
| A0A1D3JQD4 | Histidine ABC transporter substrate-binding protein OS=Pseudomonas veronii 1YdBTEX2         | Y | Y | Y | 35088    | 6.0117 | PR | PR | E      |
| A0A1D3JQE3 | Glucans biosynthesis protein G OS=Pseudomonas veronii 1YdBTEX2                              | Y | Y |   | 65087    | 6.1816 | OM | PR | P      |
| A0A1D3JQE4 | GTP-binding protein TypA/BipA OS=Pseudomonas veronii 1YdBTEX2                               | Y | Y | Y | 67050    | 5.2002 | CY | CY | TJ(mx) |
| A0A1D3JQE6 | Channel protein TolC OS=Pseudomonas veronii 1YdBTEX2                                        |   | Y | Y | 49965    | 6.0278 | OM | OM | MU     |
| A0A1D3JQE9 | Amino acid ABC transporter substrate-binding protein OS=Pseudomonas veronii 1YdBTEX2        | Y | Y |   | 29769    | 5.978  | PR | PR | ET     |
| A0A1D3JQG4 | 2_3-bisphosphoglycerate-independent phosphoglycerate mutase OS=Pseudomonas veronii 1YdBTEX2 | Y | Y |   | 54919    | 5.1167 | CY | CY | GP     |
| A0A1D3JQH2 | 50S ribosomal protein L31 OS=Pseudomonas veronii 1YdBTEX2                                   | Y | Y | Y | 8322     | 8.4478 | CY | CY | J      |
| A0A1D3JQH4 | Methyl-accepting chemotaxis protein McpS OS=Pseudomonas veronii 1YdBTEX2                    | Y | Y | Y | 68360    | 4.8105 | IM | IM | NT(mx) |
| A0A1D3JQJ5 | Fructose-1_6-bisphosphatase class 1 OS=Pseudomonas veronii 1YdBTEX2                         | Y |   |   | 37150.81 | 5.66   | CY | CY | G      |
| A0A1D3JQK4 | Alpha-1_4 glucan phosphorylase OS=Pseudomonas veronii 1YdBTEX2                              | Y | Y | Y | 91798    | 5.792  | CY | CY | G      |
| A0A1D3JQK6 | Chemotaxis protein OS=Pseudomonas veronii 1YdBTEX2                                          | Y |   |   | 58603    | 4.667  | IM | IM | NT(mx) |

|            |                                                                                               |   |   |   |          |         |    |            |        |
|------------|-----------------------------------------------------------------------------------------------|---|---|---|----------|---------|----|------------|--------|
| A0A1D3JQL2 | Acetyltransferase component of pyruvate dehydrogenase complex OS=Pseudomonas veronii 1YdBTEX2 | Y | Y | Y | 56142    | 5.4302  | UK | CY         | C      |
| A0A1D3JQL3 | Peptide methionine sulfoxide reductase MsrA OS=Pseudomonas veronii 1YdBTEX2                   | Y | Y | Y | 23472    | 4.6597  | UK | UK         | O      |
| A0A1D3JQM4 | Cobyric acid synthase OS=Pseudomonas veronii 1YdBTEX2                                         | Y |   | Y | 28585    | 4.938   | UK | CY         | D      |
| A0A1D3JQM5 | ATP-dependent protease ATPase subunit HslU OS=Pseudomonas veronii 1YdBTEX2                    | Y | Y |   | 49580    | 5.5063  | CY | CY         | OL     |
| A0A1D3JQN4 | Protein-export protein SecB OS=Pseudomonas veronii 1YdBTEX2                                   | Y | Y | Y | 17600    | 4.2979  | CY | CY         | U      |
| A0A1D3JQP1 | Poly(3-hydroxyalkanoate) granule-associated protein PhaF OS=Pseudomonas veronii 1YdBTEX2      | Y | Y |   | 28565    | 10.8486 | CY | CY         | S      |
| A0A1D3JQP4 | Pyruvate dehydrogenase E1 component OS=Pseudomonas veronii 1YdBTEX2                           | Y | Y | Y | 99244    | 5.3584  | CY | CY         | CG     |
| A0A1D3JQP5 | NADP-dependent malic enzyme OS=Pseudomonas veronii 1YdBTEX2                                   | Y | Y | Y | 44964    | 4.9526  | UK | CY         | C      |
| A0A1D3JQQ0 | Urocanate hydratase OS=Pseudomonas veronii 1YdBTEX2                                           | Y | Y |   | 61323    | 5.5034  | CY | CY         | E      |
| A0A1D3JQR5 | Proline iminopeptidase OS=Pseudomonas veronii 1YdBTEX2                                        | Y | Y |   | 36759    | 5.5693  | CY | CY         | El(mx) |
| A0A1D3JQT2 | Chemotaxis protein OS=Pseudomonas veronii 1YdBTEX2                                            | Y |   | Y | 67606    | 5.4946  | IM | IM         | NT(mx) |
| A0A1D3JQT8 | 50S ribosomal protein L9 OS=Pseudomonas veronii 1YdBTEX2                                      | Y | Y | Y | 15431    | 5.2646  | CY | CY         | J      |
| A0A1D3JQU0 | O-acetylhomoserine (Thiol)-lyase OS=Pseudomonas veronii 1YdBTEX2                              | Y |   |   | 45683    | 5.8213  | CY | CY         | EP     |
| A0A1D3JQU3 | RNA-binding protein Hfq OS=Pseudomonas veronii 1YdBTEX2                                       | Y | Y | Y | 9404     | 9.2314  | CY | CY         | S      |
| A0A1D3JQU4 | Protein HflC OS=Pseudomonas veronii 1YdBTEX2                                                  | Y | Y | Y | 32896    | 9.293   | IM | CY         | O      |
| A0A1D3JQU6 | Arginine--tRNA ligase OS=Pseudomonas veronii 1YdBTEX2                                         | Y | Y | Y | 63767    | 5.5737  | CY | CY         | J      |
| A0A1D3JQU8 | NH(3)-dependent NAD(+) synthetase OS=Pseudomonas veronii 1YdBTEX2                             | Y | Y | Y | 29844    | 5.2134  | CY | CY         | H      |
| A0A1D3JQV8 | Shikimate kinase OS=Pseudomonas veronii 1YdBTEX2                                              | Y |   |   | 18280    | 8.8931  | CY | CY         | FG     |
| A0A1D3JQW0 | Glycosyl transferase OS=Pseudomonas veronii 1YdBTEX2                                          | Y |   |   | 33315.45 | 7.82    | CY | ML (C, IM) | MJ     |
| A0A1D3JQW6 | DUF3298 domain-containing protein OS=Pseudomonas veronii 1YdBTEX2                             |   | Y |   | 25178.01 | 7.14    | PR | UK         | G      |
| A0A1D3JQW8 | GTPase HflX OS=Pseudomonas veronii 1YdBTEX2                                                   | Y |   |   | 49021.83 | 5.64    | UK | CY         | OT     |

|            |                                                                                   |   |   |   |          |         |    |    |        |
|------------|-----------------------------------------------------------------------------------|---|---|---|----------|---------|----|----|--------|
| A0A1D3JQX6 | 30S ribosomal protein S6 OS=Pseudomonas veronii 1YdBTEX2                          | Y | Y | Y | 16289    | 4.7388  | CY | CY | J      |
| A0A1D3JQX8 | Channel protein TolC OS=Pseudomonas veronii 1YdBTEX2                              | Y | Y | Y | 52670    | 5.6777  | OM | OM | MU     |
| A0A1D3JQZ1 | Thioredoxin OS=Pseudomonas veronii 1YdBTEX2                                       | Y | Y |   | 15757    | 8.6543  | CY | CY | CO     |
| A0A1D3JQZ2 | Adenylosuccinate synthetase OS=Pseudomonas veronii 1YdBTEX2                       | Y | Y |   | 46557    | 5.4697  | CY | CY | F      |
| A0A1D3JQZ5 | Leu/Ile/Val-binding protein homolog 1 OS=Pseudomonas veronii 1YdBTEX2             | Y | Y | Y | 40087    | 5.874   | PR | PR | E      |
| A0A1D3JR00 | Bifunctional protein PutA OS=Pseudomonas veronii 1YdBTEX2                         | Y | Y |   | 142427   | 5.6968  | CY | CY | CE     |
| A0A1D3JR12 | Biotin carboxylase OS=Pseudomonas veronii 1YdBTEX2                                | Y | Y | Y | 49353    | 5.8945  | CY | CY | IF     |
| A0A1D3JR13 | Phosphate starvation-inducible protein PsIF OS=Pseudomonas veronii 1YdBTEX2       |   | Y |   | 8341.13  | 9.65    | PR | UK | S      |
| A0A1D3JR14 | Protein HflK OS=Pseudomonas veronii 1YdBTEX2                                      | Y | Y | Y | 43149    | 5.2178  | IM | UK | O      |
| A0A1D3JR17 | Azurin OS=Pseudomonas veronii 1YdBTEX2                                            | Y | Y | Y | 15812    | 6.4834  | PR | PR | C      |
| A0A1D3JR22 | 30S ribosomal protein S18 OS=Pseudomonas veronii 1YdBTEX2                         | Y | Y |   | 8911     | 10.9336 | CY | CY | J      |
| A0A1D3JR26 | Alpha-2-macroglobulin OS=Pseudomonas veronii 1YdBTEX2                             | Y | Y | Y | 178036   | 5.3042  | OM | OM | PU     |
| A0A1D3JR27 | Ribonuclease R OS=Pseudomonas veronii 1YdBTEX2                                    | Y | Y | Y | 97499.63 | 8.69    | CY | CY | JKO    |
| A0A1D3JR37 | Methyl-accepting chemotaxis protein CtpL OS=Pseudomonas veronii 1YdBTEX2          | Y | Y | Y | 69417    | 4.9614  | IM | OM | NT(mx) |
| A0A1D3JR39 | DUF4136 domain-containing protein OS=Pseudomonas veronii 1YdBTEX2                 | Y | Y | Y | 20761    | 9.0337  | PR | UK | S      |
| A0A1D3JR45 | Acetyl-CoA acetyltransferase OS=Pseudomonas veronii 1YdBTEX2                      | Y | Y | Y | 45417.81 | 7.66    | CY | CY | S      |
| A0A1D3JR46 | Aldehyde dehydrogenase family 7 member A1 homolog OS=Pseudomonas veronii 1YdBTEX2 | Y |   |   | 53453    | 5.3379  | CY | CY | CE     |
| A0A1D3JR49 | Copper-exporting P-type ATPase A OS=Pseudomonas veronii 1YdBTEX2                  | Y | Y | Y | 76667    | 6.5039  | IM | IM | PC     |
| A0A1D3JR62 | Adenine deaminase OS=Pseudomonas veronii 1YdBTEX2                                 | Y | Y | Y | 35996    | 4.7417  | CY | CY | FQ     |
| A0A1D3JR63 | Omega-amino acid--pyruvate aminotransferase OS=Pseudomonas veronii 1YdBTEX2       | Y | Y | Y | 48614    | 6.0015  | CY | CY | EH(mx) |

|            |                                                                                              |   |   |   |          |        |    |    |     |
|------------|----------------------------------------------------------------------------------------------|---|---|---|----------|--------|----|----|-----|
| A0A1D3JR74 | Zinc-type alcohol dehydrogenase-like protein<br>OS=Pseudomonas veronii 1YdBTEX2              |   |   | Y | 36112    | 6.0015 | CY | CY | CIE |
| A0A1D3JR75 | [Ribosomal protein S18]-alanine N-acetyltransferase<br>OS=Pseudomonas veronii 1YdBTEX2       | Y |   |   | 16922.48 | 5.19   | CY | CY | K   |
| A0A1D3JR76 | Biotin carboxyl carrier protein of acetyl-CoA carboxylase<br>OS=Pseudomonas veronii 1YdBTEX2 | Y | Y | Y | 16248    | 4.9189 | PR | CY | CIE |
| A0A1D3JR85 | TetR family transcriptional regulator OS=Pseudomonas<br>veronii 1YdBTEX2                     | Y |   |   | 24403    | 7.9907 | EX | CY | K   |
| A0A1D3JR88 | TonB-dependent receptor OS=Pseudomonas veronii<br>1YdBTEX2                                   |   | Y | Y | 74763    | 5.4038 | OM | OM | PH  |
| A0A1D3JR94 | Uncharacterized HTH-type transcriptional regulator PA4778<br>OS=Pseudomonas veronii 1YdBTEX2 | Y | Y | Y | 15095    | 7.2583 | CY | CY | KT  |
| A0A1D3JRA5 | Fic/DOC family protein OS=Pseudomonas veronii 1YdBTEX2                                       | Y |   |   | 43394.47 | 6.9    | CY | CY | KD  |
| A0A1D3JRA8 | Bifunctional purine biosynthesis protein PurH<br>OS=Pseudomonas veronii 1YdBTEX2             |   | Y |   | 57264    | 6.1011 | CY | CY | F   |
| A0A1D3JRA9 | Methyl-accepting chemotaxis protein PctA<br>OS=Pseudomonas veronii 1YdBTEX2                  | Y |   |   | 67759.56 | 5.14   | IM | IM | NT  |
| A0A1D3JRB0 | AraC family transcriptional regulator OS=Pseudomonas<br>veronii 1YdBTEX2                     | Y |   |   | 30364.87 | 8.88   | CY | UK | K   |
| A0A1D3JRB1 | Bacterioferritin OS=Pseudomonas veronii 1YdBTEX2                                             | Y | Y | Y | 19810    | 4.4414 | CY | CY | PH  |
| A0A1D3JRB2 | 3-oxopropanoate dehydrogenase OS=Pseudomonas veronii<br>1YdBTEX2                             | Y |   | Y | 53395    | 5.7012 | CY | CY | CE  |
| A0A1D3JRB4 | Porin OS=Pseudomonas veronii 1YdBTEX2                                                        | Y | Y | Y | 48295    | 6.1582 | EX | OM | S   |
| A0A1D3JRB5 | Biosynthetic arginine decarboxylase OS=Pseudomonas<br>veronii 1YdBTEX2                       | Y | Y |   | 71314.15 | 5.32   | CY | CY | HE  |
| A0A1D3JRB8 | Uncharacterized protein OS=Pseudomonas veronii<br>1YdBTEX2                                   | Y | Y | Y | 39373    | 5.814  | OM | UK | S   |
| A0A1D3JRC4 | HPr OS=Pseudomonas veronii 1YdBTEX2                                                          | Y |   |   | 13827    | 3.8481 | CY | CY | S   |
| A0A1D3JRC8 | 3-ketoacyl-ACP reductase OS=Pseudomonas veronii<br>1YdBTEX2                                  | Y |   | Y | 47210    | 7.4121 | PR | CY | IQ  |
| A0A1D3JRD8 | Monoxygenase OS=Pseudomonas veronii 1YdBTEX2                                                 |   | Y | Y | 11078    | 5.7876 | CY | UK | C   |
| A0A1D3JRE5 | Short-chain dehydrogenase OS=Pseudomonas veronii<br>1YdBTEX2                                 | Y | Y | Y | 24432.75 | 7.3    | CY | EX | IQ  |

|            |                                                                             |   |   |   |          |         |    |    |        |
|------------|-----------------------------------------------------------------------------|---|---|---|----------|---------|----|----|--------|
| A0A1D3JRF7 | Phosphoribosylamine--glycine ligase OS=Pseudomonas veronii 1YdBTEX2         | Y | Y | Y | 45403    | 4.8223  | CY | CY | FI     |
| A0A1D3JRI0 | Ribose-phosphate pyrophosphokinase OS=Pseudomonas veronii 1YdBTEX2          | Y | Y | Y | 33834    | 5.4551  | CY | CY | FK     |
| A0A1D3JRI3 | Ribosome-binding ATPase YchF OS=Pseudomonas veronii 1YdBTEX2                | Y |   |   | 39761.49 | 4.9     | CY | CY | JCO    |
| A0A1D3JRJ4 | Molybdopterin-synthase adenylyltransferase OS=Pseudomonas veronii 1YdBTEX2  | Y |   |   | 26470.95 | 5.66    | UK | CY | H      |
| A0A1D3JRL0 | Acyltransferase OS=Pseudomonas veronii 1YdBTEX2                             | Y |   |   | 34806    | 9.7822  | IM | IM | I      |
| A0A1D3JRL1 | Peptidyl-prolyl cis-trans isomerase OS=Pseudomonas veronii 1YdBTEX2         | Y | Y | Y | 16934    | 4.2393  | CY | UK | O      |
| A0A1D3JRL2 | 30S ribosomal protein S20 OS=Pseudomonas veronii 1YdBTEX2                   |   | Y |   | 10032    | 11.3628 | CY | CY | J      |
| A0A1D3JRL7 | 50S ribosomal protein L25 OS=Pseudomonas veronii 1YdBTEX2                   | Y | Y | Y | 21203    | 5.8228  | CY | CY | J      |
| A0A1D3JRM3 | Outer membrane protein assembly factor BamD OS=Pseudomonas veronii 1YdBTEX2 | Y | Y |   | 38551    | 5.2148  | PR | OM | E      |
| A0A1D3JRM8 | Lipid A deacylase OS=Pseudomonas veronii 1YdBTEX2                           | Y | Y | Y | 18801    | 5.313   | PR | UK | M      |
| A0A1D3JRN4 | Chaperone protein ClpB OS=Pseudomonas veronii 1YdBTEX2                      | Y | Y | Y | 95411    | 5.2017  | CY | CY | O      |
| A0A1D3JRP9 | Catabolite repressor/activator OS=Pseudomonas veronii 1YdBTEX2              | Y | Y |   | 36325    | 6.75    | UK | CY | KG     |
| A0A1D3JRQ8 | TPR repeat-containing protein PA4667 OS=Pseudomonas veronii 1YdBTEX2        | Y | Y | Y | 62481.09 | 4.9     | UK | CY | MO(mx) |
| A0A1D3JRR2 | Methyl-accepting chemotaxis protein OS=Pseudomonas veronii 1YdBTEX2         | Y |   |   | 72744    | 5.0962  | IM | IM | NT(mx) |
| A0A1D3JRS0 | Uncharacterized protein OS=Pseudomonas veronii 1YdBTEX2                     | Y | Y | Y | 25611    | 7.5044  | OM | UK | S      |
| A0A1D3JRS4 | Periplasmic dipeptide transport protein OS=Pseudomonas veronii 1YdBTEX2     |   | Y | Y | 58644    | 6.1831  | PR | PR | E      |
| A0A1D3JRS8 | Periplasmic dipeptide transport protein OS=Pseudomonas veronii 1YdBTEX2     | Y | Y | Y | 60156    | 6.8218  | PR | PR | E      |

|            |                                                                                            |   |   |   |          |         |    |    |    |
|------------|--------------------------------------------------------------------------------------------|---|---|---|----------|---------|----|----|----|
| A0A1D3JRT8 | 30S ribosomal protein S9 OS=Pseudomonas veronii 1YdBTEX2                                   | Y | Y | Y | 14606    | 11.7539 | CY | CY | J  |
| A0A1D3JRT9 | Sulfate adenyllyltransferase subunit 2 OS=Pseudomonas veronii 1YdBTEX2                     | Y | Y | Y | 35198    | 5.9458  | CY | CY | EH |
| A0A1D3JRU4 | Ubiquinol-cytochrome c reductase iron-sulfur subunit OS=Pseudomonas veronii 1YdBTEX2       | Y |   | Y | 21090    | 8.2573  | PR | IM | C  |
| A0A1D3JRU5 | Cytochrome c1 OS=Pseudomonas veronii 1YdBTEX2                                              | Y |   | Y | 28913    | 7.2495  | IM | UK | C  |
| A0A1D3JRW1 | Porin OS=Pseudomonas veronii 1YdBTEX2                                                      |   | Y | Y | 50660    | 6.1758  | OM | OM | S  |
| A0A1D3JRW6 | Cell shape-determining protein MreB OS=Pseudomonas veronii 1YdBTEX2                        | Y | Y | Y | 36980    | 5.127   | CY | CY | DO |
| A0A1D3JRW8 | Cytochrome D ubiquinol oxidase subunit III OS=Pseudomonas veronii 1YdBTEX2                 | Y | Y | Y | 16331    | 6.2227  | IM | UK | S  |
| A0A1D3JRX0 | Nucleotide-binding protein PVE_R1G0955 OS=Pseudomonas veronii 1YdBTEX2                     | Y | Y | Y | 32052.75 | 6       | CY | CY | H  |
| A0A1D3JRX2 | Aspartyl/glutamyl-tRNA(Asn/Gln) amidotransferase subunit B OS=Pseudomonas veronii 1YdBTEX2 | Y | Y | Y | 52842    | 4.8882  | CY | CY | J  |
| A0A1D3JRX5 | Cytochrome b OS=Pseudomonas veronii 1YdBTEX2                                               |   | Y |   | 45982    | 8.3071  | IM | IM | C  |
| A0A1D3JRX9 | Metalloprotease TldD homolog OS=Pseudomonas veronii 1YdBTEX2                               |   | Y |   | 50228    | 5.1299  | CY | CY | S  |
| A0A1D3JRZ9 | Organic solvent ABC transporter substrate-binding protein OS=Pseudomonas veronii 1YdBTEX2  | Y | Y | Y | 16378    | 5.6792  | IM | UK | Q  |
| A0A1D3JS01 | Histidinol dehydrogenase OS=Pseudomonas veronii 1YdBTEX2                                   | Y | Y |   | 47356    | 4.9453  | CY | CY | E  |
| A0A1D3JS08 | Probable malate:quinone oxidoreductase OS=Pseudomonas veronii 1YdBTEX2                     | Y |   |   | 54634.09 | 6.88    | PR | CY | E  |
| A0A1D3JS14 | 50S ribosomal protein L13 OS=Pseudomonas veronii 1YdBTEX2                                  | Y | Y | Y | 15708    | 10.0737 | CY | CY | J  |
| A0A1D3JS15 | Uncharacterized protein OS=Pseudomonas veronii 1YdBTEX2                                    | Y | Y | Y | 66959    | 5.2368  | EX | OM | X  |
| A0A1D3JS16 | Lipopolysaccharide export system protein LptA OS=Pseudomonas veronii 1YdBTEX2              | Y |   |   | 16388.43 | 8.11    | OM | UK | S  |
| A0A1D3JS21 | UPF0102 protein PVE_R1G1005 OS=Pseudomonas veronii 1YdBTEX2                                | Y |   |   | 13982.23 | 7.79    | CY | UK | L  |

|            |                                                                                                                                                     |   |   |   |          |        |    |            |        |
|------------|-----------------------------------------------------------------------------------------------------------------------------------------------------|---|---|---|----------|--------|----|------------|--------|
| A0A1D3JS27 | UDP-N-acetylmuramoylalanine--D-glutamate ligase OS=Pseudomonas veronii 1YdBTEX2                                                                     | Y | Y | Y | 47515.42 | 5.64   | CY | CY         | MHJ    |
| A0A1D3JS30 | Uncharacterized protein PA3922 OS=Pseudomonas veronii 1YdBTEX2                                                                                      | Y | Y | Y | 50686    | 9.208  | PR | UK         | S      |
| A0A1D3JS31 | Cell envelope biogenesis protein OmpA OS=Pseudomonas veronii 1YdBTEX2                                                                               | Y |   |   | 26804    | 9.5552 | EX | ML (UK)    | MN     |
| A0A1D3JS34 | Glutamyl-tRNA(Gln) amidotransferase subunit A OS=Pseudomonas veronii 1YdBTEX2                                                                       | Y |   |   | 51664.17 | 6.4    | CY | CY         | JD     |
| A0A1D3JS35 | UDP-N-acetylmuramate--L-alanine ligase OS=Pseudomonas veronii 1YdBTEX2                                                                              | Y | Y | Y | 52630    | 5.7817 | CY | CY         | MHJ    |
| A0A1D3JS37 | Porin OS=Pseudomonas veronii 1YdBTEX2                                                                                                               | Y |   | Y | 48337    | 5.2734 | OM | OM         | S      |
| A0A1D3JS38 | Ribosomal RNA small subunit methyltransferase H OS=Pseudomonas veronii 1YdBTEX2                                                                     | Y |   |   | 34353.94 | 5.88   | CY | CY         | JK     |
| A0A1D3JS41 | Uncharacterized protein OS=Pseudomonas veronii 1YdBTEX2                                                                                             | Y | Y | Y | 65041    | 7.3447 | PR | UK         | M      |
| A0A1D3JS51 | D-alanine--D-alanine ligase OS=Pseudomonas veronii 1YdBTEX2                                                                                         | Y | Y | Y | 34282    | 4.6377 | CY | CY         | FI     |
| A0A1D3JS52 | Cell division protein FtsZ OS=Pseudomonas veronii 1YdBTEX2                                                                                          | Y | Y | Y | 41931    | 4.9688 | CY | CY         | D      |
| A0A1D3JS54 | Cell division protein FtsA OS=Pseudomonas veronii 1YdBTEX2                                                                                          | Y | Y | Y | 44848    | 4.9761 | CY | CY         | DN(mx) |
| A0A1D3JS77 | Uncharacterized protein OS=Pseudomonas veronii 1YdBTEX2                                                                                             | Y | Y | Y | 14949    | 5.9165 | CY | UK         | S      |
| A0A1D3JS79 | Uncharacterized protein OS=Pseudomonas veronii 1YdBTEX2                                                                                             |   |   | Y | 6873     | 3.5977 | CY | UK         | S      |
| A0A1D3JSA4 | Phosphoheptose isomerase OS=Pseudomonas veronii 1YdBTEX2                                                                                            |   |   | Y | 21279    | 4.5396 | CY | CY         | GM     |
| A0A1D3JSA5 | Homogentisate 1_2-dioxygenase OS=Pseudomonas veronii 1YdBTEX2                                                                                       |   | Y | Y | 47211    | 5.4653 | CY | UK         | Q      |
| A0A1D3JSB3 | UDP-N-acetylglucosamine--N-acetylmuramyl-(pentapeptide) pyrophosphoryl-undecaprenol N-acetylglucosamine transferase OS=Pseudomonas veronii 1YdBTEX2 | Y |   |   | 37737.1  | 9.3    | UK | ML (C, IM) | MG(mx) |

|            |                                                                                                     |   |   |   |       |        |    |            |        |
|------------|-----------------------------------------------------------------------------------------------------|---|---|---|-------|--------|----|------------|--------|
| A0A1D3JSC3 | Fumarylacetoacetase OS=Pseudomonas veronii 1YdBTEX2                                                 | Y | Y |   | 46311 | 5.1489 | UK | CY         | Q      |
| A0A1D3JSC7 | Leucine dehydrogenase OS=Pseudomonas veronii 1YdBTEX2                                               |   |   | Y | 35315 | 5.7598 | CY | CY         | EH     |
| A0A1D3JSD1 | Uncharacterized protein OS=Pseudomonas veronii 1YdBTEX2                                             | Y | Y | Y | 20438 | 9.8936 | PR | UK         | M      |
| A0A1D3JSD2 | Amino-acid ABC transporter-binding protein YhdW OS=Pseudomonas veronii 1YdBTEX2                     | Y | Y | Y | 36602 | 6.6826 | OM | PR         | ET     |
| A0A1D3JSD5 | Ribosomal subunit interface protein OS=Pseudomonas veronii 1YdBTEX2                                 | Y | Y | Y | 15280 | 4.73   | CY | CY         | J      |
| A0A1D3JSE9 | Nucleoid-associated protein PFL_1060 OS=Pseudomonas veronii 1YdBTEX2                                |   |   | Y | 26914 | 5.1782 | CY | CY         | S      |
| A0A1D3JSF1 | Probable cytosol aminopeptidase OS=Pseudomonas veronii 1YdBTEX2                                     | Y | Y | Y | 52329 | 7.9717 | CY | CY         | E      |
| A0A1D3JSF6 | Phospholipid-binding protein OS=Pseudomonas veronii 1YdBTEX2                                        |   | Y |   | 20407 | 9.2344 | CY | CY         | GM     |
| A0A1D3JSF8 | Uncharacterized ABC transporter ATP-binding protein YbhF OS=Pseudomonas veronii 1YdBTEX2            | Y |   |   | 63840 | 5.1255 | UK | CY         | V      |
| A0A1D3JSG1 | UDP-N-acetylmuramoyl-tripeptide--D-alanyl-D-alanine ligase OS=Pseudomonas veronii 1YdBTEX2          | Y | Y | Y | 47310 | 6.5405 | CY | CY         | MHJ    |
| A0A1D3JSG8 | Uncharacterized protein OS=Pseudomonas veronii 1YdBTEX2                                             | Y |   |   | 9743  | 4.5073 | CY | UK         | S      |
| A0A1D3JSG9 | ATPase OS=Pseudomonas veronii 1YdBTEX2                                                              | Y | Y | Y | 51814 | 5.4756 | PR | UK         | S      |
| A0A1D3JSH2 | UDP-3-O-acyl-N-acetylglucosamine deacetylase OS=Pseudomonas veronii 1YdBTEX2                        | Y | Y | Y | 33197 | 4.7241 | CY | CY         | M      |
| A0A1D3JSJ1 | IclR family transcriptional regulator OS=Pseudomonas veronii 1YdBTEX2                               | Y |   |   | 27453 | 6.1802 | CY | CY         | K      |
| A0A1D3JSJ6 | Amidase domain-containing protein OS=Pseudomonas veronii 1YdBTEX2                                   |   |   | Y | 46914 | 6.7778 | CY | CY         | J      |
| A0A1D3JSK7 | Uncharacterized protein OS=Pseudomonas veronii 1YdBTEX2                                             | Y | Y |   | 9680  | 9.7808 | CY | CY         | L      |
| A0A1D3JSM2 | Uncharacterized amino-acid ABC transporter ATP-binding protein YhdZ OS=Pseudomonas veronii 1YdBTEX2 | Y |   | Y | 28829 | 7.2773 | CY | ML (C, IM) | EV(mx) |

|            |                                                                                        |   |   |   |          |        |    |    |        |
|------------|----------------------------------------------------------------------------------------|---|---|---|----------|--------|----|----|--------|
| A0A1D3JSM7 | Chemotaxis protein CheY OS=Pseudomonas veronii 1YdBTEX2                                | Y | Y | Y | 50725    | 4.9893 | CY | CY | T      |
| A0A1D3JSM9 | Lon protease OS=Pseudomonas veronii 1YdBTEX2                                           | Y |   |   | 89425    | 5.9399 | CY | CY | O      |
| A0A1D3JSP6 | Alkyl hydroperoxide reductase C OS=Pseudomonas veronii 1YdBTEX2                        | Y | Y | Y | 21906    | 4.9438 | CY | CY | O      |
| A0A1D3JSP7 | Glutamate/aspartate transport ATP-binding protein GltL OS=Pseudomonas veronii 1YdBTEX2 | Y | Y | Y | 26969    | 6.2637 | CY | IM | EV(mx) |
| A0A1D3JSR6 | Methionine--tRNA ligase OS=Pseudomonas veronii 1YdBTEX2                                | Y | Y | Y | 75630.08 | 5.61   | CY | CY | J      |
| A0A1D3JSR8 | Quinoprotein glucose dehydrogenase A OS=Pseudomonas veronii 1YdBTEX2                   |   | Y | Y | 85911    | 5.9238 | IM | PR | G      |
| A0A1D3JSR9 | Argininosuccinate synthase OS=Pseudomonas veronii 1YdBTEX2                             | Y | Y | Y | 45399    | 5.3159 | CY | CY | EJ     |
| A0A1D3JSV2 | NADPH dehydrogenase OS=Pseudomonas veronii                                             | Y | Y | Y | 40479    | 5.8887 | OM | CY | C      |
| A0A1D3JSV4 | Ferredoxin--NADP reductase OS=Pseudomonas veronii 1YdBTEX2                             |   | Y | Y | 29756    | 5.9092 | CY | CY | C      |
| A0A1D3JSV7 | ABC transporter periplasmic-binding protein YdcS OS=Pseudomonas veronii 1YdBTEX2       |   | Y | Y | 41939    | 5.9854 | PR | PR | EP     |
| A0A1D3JSW3 | Gamma-aminobutyraldehyde dehydrogenase OS=Pseudomonas veronii 1YdBTEX2                 | Y | Y |   | 50933    | 5.4331 | CY | CY | C      |
| A0A1D3JSW4 | Uncharacterized protein OS=Pseudomonas veronii 1YdBTEX2                                | Y | Y | Y | 24939.95 | 5.73   | PR | IM | TP     |
| A0A1D3JSW6 | Glutamate/aspartate periplasmic-binding protein OS=Pseudomonas veronii 1YdBTEX2        | Y | Y | Y | 33370    | 8.5986 | PR | PR | ET     |
| A0A1D3JSX5 | Bacterioferritin OS=Pseudomonas veronii 1YdBTEX2                                       |   | Y | Y | 17901    | 4.6963 | CY | CY | P      |
| A0A1D3JSX6 | Glycerol kinase OS=Pseudomonas veronii 1YdBTEX2                                        | Y | Y | Y | 55514    | 5.3013 | CY | CY | CG     |
| A0A1D3JSY3 | Chromosome partitioning protein ParA OS=Pseudomonas veronii 1YdBTEX2                   | Y |   | Y | 15198    | 9.479  | OM | UK | M      |
| A0A1D3JSY5 | TetR family transcriptional regulator OS=Pseudomonas veronii 1YdBTEX2                  | Y | Y |   | 26599    | 6.4043 | CY | CY | K      |
| A0A1D3JSZ2 | Chemotaxis protein OS=Pseudomonas veronii 1YdBTEX2                                     | Y |   | Y | 58559.19 | 5.1    | IM | IM | NT     |
| A0A1D3JSZ5 | Adenylate kinase OS=Pseudomonas veronii 1YdBTEX2                                       | Y |   |   | 23089    | 5.7056 | PR | CY | F      |

|            |                                                                                                            |   |   |   |          |        |    |            |     |
|------------|------------------------------------------------------------------------------------------------------------|---|---|---|----------|--------|----|------------|-----|
| A0A1D3JSZ7 | Uncharacterized protein OS=Pseudomonas veronii 1YdBTEX2                                                    |   | Y |   | 14314    | 8.6704 | PR | UK         | S   |
| A0A1D3JT01 | Glucans biosynthesis protein D OS=Pseudomonas veronii 1YdBTEX2                                             | Y | Y | Y | 60428    | 5.9121 | PR | PR         | P   |
| A0A1D3JT07 | Adenosylmethionine-8-amino-7-oxononanoate aminotransferase OS=Pseudomonas veronii 1YdBTEX2                 | Y | Y | Y | 52137.2  | 5.77   | CY | CY         | EH  |
| A0A1D3JT12 | 2_3_4_5-tetrahydropyridine-2_6-dicarboxylate N-succinyltransferase OS=Pseudomonas veronii 1YdBTEX2         | Y |   | Y | 36000    | 5.584  | UK | CY         | E   |
| A0A1D3JT19 | Lysine--tRNA ligase OS=Pseudomonas veronii 1YdBTEX2                                                        | Y |   | Y | 56884    | 4.9556 | CY | CY         | JK  |
| A0A1D3JT24 | Methionine aminopeptidase OS=Pseudomonas veronii 1YdBTEX2                                                  |   | Y |   | 28536    | 6.123  | CY | CY         | CE  |
| A0A1D3JT28 | Phosphoenolpyruvate carboxylase OS=Pseudomonas veronii 1YdBTEX2                                            | Y |   | Y | 98134    | 5.6558 | CY | CY         | C   |
| A0A1D3JT33 | Glutaredoxin OS=Pseudomonas veronii 1YdBTEX2                                                               | Y | Y | Y | 12213    | 4.5    | CY | UK         | CO  |
| A0A1D3JT34 | Acetyl-coenzyme A carboxylase carboxyl transferase subunit alpha OS=Pseudomonas veronii 1YdBTEX2           | Y | Y | Y | 34840    | 5.7144 | CY | CY         | I   |
| A0A1D3JT35 | Skp-like protein OS=Pseudomonas veronii 1YdBTEX2                                                           | Y | Y | Y | 18963    | 9.7324 | UK | ML (UK)    | M   |
| A0A1D3JT43 | 30S ribosomal protein S2 OS=Pseudomonas veronii 1YdBTEX2                                                   | Y | Y | Y | 27064    | 9.2915 | CY | CY         | J   |
| A0A1D3JT44 | 2-dehydro-3-deoxyphosphooctonate aldolase OS=Pseudomonas veronii 1YdBTEX2                                  | Y |   |   | 30775.75 | 5.35   | CY | CY         | EM  |
| A0A1D3JT50 | dCTP deaminase OS=Pseudomonas veronii 1YdBTEX2                                                             | Y |   |   | 21216    | 5.3496 | CY | CY         | F   |
| A0A1D3JT61 | Enolase OS=Pseudomonas veronii 1YdBTEX2                                                                    | Y | Y | Y | 45605    | 4.8003 | CY | CY         | G   |
| A0A1D3JT64 | Lysine/arginine/ornithine-binding periplasmic protein OS=Pseudomonas veronii 1YdBTEX2                      |   | Y | Y | 27426    | 6.189  | PR | PR         | ET  |
| A0A1D3JT65 | Membrane protein OS=Pseudomonas veronii 1YdBTEX2                                                           | Y | Y | Y | 28646    | 9.5332 | OM | OM         | MP  |
| A0A1D3JT69 | Protein RecA OS=Pseudomonas veronii 1YdBTEX2                                                               | Y | Y |   | 37526    | 5.4507 | CY | CY         | LT  |
| A0A1D3JT71 | Outer membrane protein assembly factor Bama OS=Pseudomonas veronii 1YdBTEX2                                | Y | Y | Y | 87288    | 5.1841 | OM | OM         | M   |
| A0A1D3JT78 | CTP synthase OS=Pseudomonas veronii 1YdBTEX2                                                               | Y | Y | Y | 59604.54 | 5.73   | UK | CY         | F   |
| A0A1D3JT86 | High-affinity branched-chain amino acid transport ATP-binding protein BraF OS=Pseudomonas veronii 1YdBTEX2 | Y |   |   | 28157    | 7.3682 | CY | ML (C, IM) | EVP |
| A0A1D3JT88 | Membrane protein OS=Pseudomonas veronii 1YdBTEX2                                                           | Y | Y | Y | 15847    | 9.4834 | PR | OM         | MI  |

|            |                                                                                                         |   |   |   |          |        |    |            |        |
|------------|---------------------------------------------------------------------------------------------------------|---|---|---|----------|--------|----|------------|--------|
| A0A1D3JT92 | Leucine-_ isoleucine-_ valine-_ threonine-_ and alanine-binding protein OS=Pseudomonas veronii 1YdBTEX2 | Y | Y | Y | 39740    | 6.4468 | PR | PR         | E      |
| A0A1D3JTA1 | 3-oxoadipate CoA-transferase OS=Pseudomonas veronii 1YdBTEX2                                            |   |   | Y | 26988    | 5.27   | CY | CY         | IC     |
| A0A1D3JTA7 | Protocatechuate 3_4-dioxygenase subunit alpha OS=Pseudomonas veronii 1YdBTEX2                           |   | Y | Y | 20539    | 4.8369 | CY | CY         | Q      |
| A0A1D3JTC1 | CSD domain-containing protein OS=Pseudomonas veronii 1YdBTEX2                                           |   | Y |   | 7721     | 7.7212 | CY | CY         | KL     |
| A0A1D3JTE0 | Toluene efflux pump outer membrane protein TtgC OS=Pseudomonas veronii 1YdBTEX2                         |   | Y | Y | 52598    | 8.2998 | OM | OM         | MU     |
| A0A1D3JTE5 | Membrane protein OS=Pseudomonas veronii 1YdBTEX2                                                        | Y | Y |   | 23927    | 5.439  | UK | OM         | M      |
| A0A1D3JTF4 | Elongation factor Ts OS=Pseudomonas veronii 1YdBTEX2                                                    | Y | Y | Y | 30258    | 5.1196 | CY | CY         | J      |
| A0A1D3JTF9 | Protein DJ-1 homolog D OS=Pseudomonas veronii 1YdBTEX2                                                  | Y |   |   | 20515    | 5.4668 | CY | CY         | KQF    |
| A0A1D3JTG6 | 3-hydroxyacyl-[acyl-carrier-protein] dehydratase FabZ OS=Pseudomonas veronii 1YdBTEX2                   | Y | Y | Y | 16690    | 7.8398 | CY | CY         | IQ     |
| A0A1D3JTI3 | 3-oxoadipate enol-lactonase 1 OS=Pseudomonas veronii 1YdBTEX2                                           | Y |   |   | 28351.37 | 5.15   | CY | CY         | EI     |
| A0A1D3JTJ5 | Toluene efflux pump periplasmic linker protein TtgA OS=Pseudomonas veronii 1YdBTEX2                     | Y | Y |   | 38820.31 | 6.75   | PR | IM         | MVP    |
| A0A1D3JTK4 | RNA polymerase sigma factor OS=Pseudomonas veronii 1YdBTEX2                                             | Y | Y | Y | 22237    | 5.1504 | CY | CY         | K      |
| A0A1D3JTK8 | LemA family lipoprotein OS=Pseudomonas veronii 1YdBTEX2                                                 | Y | Y | Y | 22496    | 8.5488 | OM | UK         | S      |
| A0A1D3JTL2 | Uncharacterized protein OS=Pseudomonas veronii 1YdBTEX2                                                 | Y | Y |   | 40447    | 4.9702 | OM | OM         | M      |
| A0A1D3JTM0 | Sigma factor AlgU negative regulatory protein OS=Pseudomonas veronii 1YdBTEX2                           | Y |   |   | 20867    | 5.3101 | CY | IM         | T      |
| A0A1D3JTP0 | Chemotaxis protein OS=Pseudomonas veronii 1YdBTEX2                                                      | Y |   | Y | 57712    | 5.41   | IM | ML (IM, OM | NT     |
| A0A1D3JTP5 | Efflux pump membrane transporter OS=Pseudomonas veronii 1YdBTEX2                                        | Y |   | Y | 112782.2 | 6.13   | IM | IM         | VU(mx) |
| A0A1D3JTR0 | 4-hydroxy-tetrahydrodipicolinate synthase OS=Pseudomonas veronii 1YdBTEX2                               | Y |   |   | 31186    | 5.3218 | CY | CY         | EM     |

|            |                                                                                             |   |   |   |          |        |    |    |    |
|------------|---------------------------------------------------------------------------------------------|---|---|---|----------|--------|----|----|----|
| A0A1D3JTS7 | Periplasmic serine endoprotease DegP-like<br>OS=Pseudomonas veronii 1YdBTEX2                | Y |   |   | 50701    | 5.8989 | PR | PR | O  |
| A0A1D3JTT2 | Cache domain containing protein OS=Pseudomonas veronii<br>1YdBTEX2                          | Y |   |   | 28673.77 | 8.3    | PR | UK | T  |
| A0A1D3JTT4 | Cysteine synthase OS=Pseudomonas veronii 1YdBTEX2                                           | Y | Y | Y | 34233    | 5.9839 | CY | CY | EK |
| A0A1D3JTT6 | Uncharacterized protein OS=Pseudomonas veronii<br>1YdBTEX2                                  | Y |   |   | 6481.26  | 4.81   | UK | UK | S  |
| A0A1D3JTU6 | DNA topoisomerase 1 OS=Pseudomonas veronii 1YdBTEX2                                         | Y | Y | Y | 97213.29 | 8.5    | CY | CY | LK |
| A0A1D3JTU9 | Sulfur carrier protein TusA OS=Pseudomonas veronii<br>1YdBTEX2                              | Y |   |   | 9333     | 4.9277 | CY | CY | O  |
| A0A1D3JTV5 | Universal stress protein OS=Pseudomonas veronii<br>1YdBTEX2                                 | Y | Y | Y | 15787    | 6.2446 | CY | UK | T  |
| A0A1D3JTV9 | Fatty acid oxidation complex subunit alpha<br>OS=Pseudomonas veronii 1YdBTEX2               | Y | Y | Y | 76867.26 | 5.86   | CY | CY | I  |
| A0A1D3JTW0 | Glyceraldehyde-3-phosphate dehydrogenase-like protein<br>OS=Pseudomonas veronii 1YdBTEX2    | Y | Y | Y | 53122    | 8.4946 | CY | CY | E  |
| A0A1D3JTW1 | Glycerophosphoryl diester phosphodiesterase<br>OS=Pseudomonas veronii 1YdBTEX2              | Y |   |   | 26898.75 | 6.32   | CY | CY | C  |
| A0A1D3JTX7 | Porin OS=Pseudomonas veronii 1YdBTEX2                                                       | Y |   |   | 43318.6  | 6.22   | EX | OM | S  |
| A0A1D3JTY1 | ATPase AAA OS=Pseudomonas veronii 1YdBTEX2                                                  | Y |   |   | 32138    | 5.7964 | CY | CY | LO |
| A0A1D3JTY9 | Sigma factor AlgU regulatory protein MucB<br>OS=Pseudomonas veronii 1YdBTEX2                |   | Y |   | 33101.87 | 5.53   | UK | PR | T  |
| A0A1D3JTZ0 | Lytic transglycosylase OS=Pseudomonas veronii 1YdBTEX2                                      | Y |   |   | 71127.14 | 9.4    | OM | PR | MK |
| A0A1D3JTZ7 | Lipoprotein OS=Pseudomonas veronii 1YdBTEX2                                                 | Y |   |   | 12878.43 | 8.89   | PR | UK | M  |
| A0A1D3JTZ9 | Phosphoribosylaminoimidazole-succinocarboxamide<br>synthase OS=Pseudomonas veronii 1YdBTEX2 | Y | Y | Y | 26905    | 5.4976 | CY | CY | F  |
| A0A1D3JU04 | VacJ family lipoprotein OS=Pseudomonas veronii 1YdBTEX2                                     | Y | Y |   | 25711    | 5.1812 | EX | OM | M  |
| A0A1D3JU12 | Diguanylate cyclase OS=Pseudomonas veronii 1YdBTEX2                                         | Y | Y | Y | 56132    | 5.707  | PR | PR | E  |
| A0A1D3JU16 | LysR family transcriptional regulator OS=Pseudomonas<br>veronii 1YdBTEX2                    |   |   | Y | 35800    | 6.6475 | CY | CY | K  |
| A0A1D3JU17 | Transaldolase OS=Pseudomonas veronii 1YdBTEX2                                               | Y |   | Y | 33672    | 5.4829 | IM | CY | G  |
| A0A1D3JU31 | CSD domain-containing protein OS=Pseudomonas veronii<br>1YdBTEX2                            | Y | Y | Y | 7782     | 7.6494 | CY | CY | KL |

|            |                                                                                          |   |   |   |          |        |    |             |        |
|------------|------------------------------------------------------------------------------------------|---|---|---|----------|--------|----|-------------|--------|
| A0A1D3JU39 | Enoyl-[acyl-carrier-protein] reductase [NADH]<br>OS=Pseudomonas veronii 1YdBTEX2         | Y | Y |   | 43068    | 4.9819 | CY | CY          | I      |
| A0A1D3JU43 | Uncharacterized protein C11D3.03c OS=Pseudomonas<br>veronii 1YdBTEX2                     | Y | Y |   | 32034    | 5.6763 | CY | CY          | P      |
| A0A1D3JU50 | Lipoprotein OS=Pseudomonas veronii 1YdBTEX2                                              | Y | Y |   | 9938     | 9.0059 | PR | UK          | M      |
| A0A1D3JU53 | Bifunctional chorismate mutase/prephenate dehydratase<br>OS=Pseudomonas veronii 1YdBTEX2 | Y | Y | Y | 40336    | 6.1348 | CY | CY          | E      |
| A0A1D3JU60 | Methylthioribose-1-phosphate isomerase<br>OS=Pseudomonas veronii 1YdBTEX2                |   |   | Y | 38489    | 5.3247 | CY | CY          | JG     |
| A0A1D3JU80 | Aconitate hydratase OS=Pseudomonas veronii 1YdBTEX2                                      | Y | Y |   | 99089    | 5.4712 | CY | CY          | CE     |
| A0A1D3JU98 | Hypothetical secreted protein OS=Pseudomonas veronii<br>1YdBTEX2                         | Y | Y | Y | 8821     | 8.7642 | OM | OM          | S      |
| A0A1D3JUA2 | Protease HtpX OS=Pseudomonas veronii 1YdBTEX2                                            | Y | Y | Y | 32495.92 | 8.73   | IM | IM          | OM(mx) |
| A0A1D3JUB3 | 30S ribosomal protein S1 OS=Pseudomonas veronii<br>1YdBTEX2                              | Y | Y | Y | 62410    | 4.6509 | CY | CY          | JK(mx) |
| A0A1D3JUB5 | Elongation factor P OS=Pseudomonas veronii 1YdBTEX2                                      | Y | Y | Y | 21218    | 4.5322 | CY | CY          | J      |
| A0A1D3JUB6 | DNA gyrase subunit A OS=Pseudomonas veronii 1YdBTEX2                                     | Y | Y | Y | 97806    | 5.13   | CY | CY          | L      |
| A0A1D3JUC7 | Phospho-2-dehydro-3-deoxyheptonate aldolase<br>OS=Pseudomonas veronii 1YdBTEX2           | Y |   |   | 49828.96 | 5.79   | OM | CY          | E      |
| A0A1D3JUD1 | Molybdenum cofactor biosynthesis protein B<br>OS=Pseudomonas veronii 1YdBTEX2            | Y | Y | Y | 19184    | 5.4141 | CY | CY          | H      |
| A0A1D3JUF4 | Hypothetical secreted protein OS=Pseudomonas veronii<br>1YdBTEX2                         | Y | Y | Y | 8117     | 5.0054 | PR | UK          | M      |
| A0A1D3JUH6 | Metalloprotease OS=Pseudomonas veronii 1YdBTEX2                                          | Y |   |   | 53470.4  | 6.11   | EX | EX          | PQ(mx) |
| A0A1D3JUH9 | Chemotaxis sensory transducer OS=Pseudomonas veronii<br>1YdBTEX2                         | Y |   |   | 72814    | 5.6177 | UK | IM          | MN(mx) |
| A0A1D3JUJ4 | LysR family transcriptional regulator OS=Pseudomonas<br>veronii 1YdBTEX2                 | Y | Y |   | 31658.2  | 5.67   | CY | CY          | K      |
| A0A1D3JUJ8 | Methyl-accepting chemotaxis protein OS=Pseudomonas<br>veronii 1YdBTEX2                   | Y | Y | Y | 73016.82 | 5.46   | IM | ML (IM, OM) | NT     |
| A0A1D3JUN6 | Neutral metalloproteinase OS=Pseudomonas veronii<br>1YdBTEX2                             |   | Y |   | 38866    | 6.5669 | CY | EX          | EO     |

|            |                                                                         |   |   |   |          |        |    |            |        |
|------------|-------------------------------------------------------------------------|---|---|---|----------|--------|----|------------|--------|
| A0A1D3JUP1 | tRNA pseudouridine synthase A OS=Pseudomonas veronii 1YdBTEX2           | Y |   |   | 31786.14 | 8.9    | CY | CY         | J      |
| A0A1D3JUP9 | Uncharacterized protein YafE OS=Pseudomonas veronii 1YdBTEX2            |   | Y |   | 27994    | 5.8462 | UK | CY         | QH     |
| A0A1D3JUR6 | Peptidoglycan-binding protein OS=Pseudomonas veronii 1YdBTEX2           | Y |   |   | 87335.58 | 4.47   | IM | UK         | NU     |
| A0A1D3JUR8 | Translational regulator CsrA OS=Pseudomonas veronii 1YdBTEX2            | Y | Y | Y | 6962.78  | 6.53   | UK | UK         | T      |
| A0A1D3JUR9 | Conserved hypothetical secreted protein OS=Pseudomonas veronii 1YdBTEX2 |   | Y |   | 8475.25  | 9.1    | PR | PR         | S      |
| A0A1D3JUS2 | Membrane protein OS=Pseudomonas veronii 1YdBTEX2                        | Y |   |   | 11267    | 4.5    | CY | UK         | T      |
| A0A1D3JUS8 | Glutaminase-asparaginase OS=Pseudomonas veronii 1YdBTEX2                | Y | Y | Y | 38653    | 8.7612 | UK | PR         | EJ     |
| A0A1D3JUT5 | 50S ribosomal protein L20 OS=Pseudomonas veronii 1YdBTEX2               | Y | Y | Y | 13305    | 12     | CY | CY         | J      |
| A0A1D3JUT7 | Uncharacterized protein OS=Pseudomonas veronii 1YdBTEX2                 | Y |   | Y | 11264    | 8.0068 | PR | UK         | S      |
| A0A1D3JUT9 | LacI family transcriptional regulator OS=Pseudomonas veronii 1YdBTEX2   | Y |   |   | 33220    | 9.3164 | CY | CY         | G      |
| A0A1D3JUU2 | CSD domain-containing protein OS=Pseudomonas veronii 1YdBTEX2           | Y |   |   | 7651     | 7.708  | CY | CY         | KL     |
| A0A1D3JUV1 | Threonine--tRNA ligase OS=Pseudomonas veronii 1YdBTEX2                  | Y | Y | Y | 72424    | 5.6997 | CY | CY         | J      |
| A0A1D3JUW4 | Aminotransferase OS=Pseudomonas veronii 1YdBTEX2                        | Y |   | Y | 42929    | 6      | CY | CY         | EK     |
| A0A1D3JUY1 | Ftsk_gamma domain-containing protein OS=Pseudomonas veronii 1YdBTEX2    | Y |   |   | 38600.73 | 4.64   | CY | ML (C, IM) | DJ     |
| A0A1D3JUY3 | Aspartate-semialdehyde dehydrogenase OS=Pseudomonas veronii 1YdBTEX2    | Y | Y | Y | 40530    | 5.2983 | UK | CY         | E      |
| A0A1D3JV13 | Uncharacterized protein OS=Pseudomonas veronii 1YdBTEX2                 | Y | Y | Y | 63142.31 | 4.93   | CY | UK         | S      |
| A0A1D3JV15 | Uncharacterized protein OS=Pseudomonas veronii 1YdBTEX2                 |   |   | Y | 11166    | 5.1064 | UK | CY         | S      |
| A0A1D3JV23 | Protein LkcJ OS=Pseudomonas veronii 1YdBTEX2                            | Y |   |   | 58533.29 | 6.5    | CY | CY         | VH(mx) |

|            |                                                                                                                |   |   |   |          |        |    |    |        |
|------------|----------------------------------------------------------------------------------------------------------------|---|---|---|----------|--------|----|----|--------|
| A0A1D3JV29 | Phenylalanine--tRNA ligase beta subunit OS=Pseudomonas veronii 1YdBTEX2                                        | Y |   |   | 86514.11 | 5.28   | UK | UK | J      |
| A0A1D3JV34 | 3-isopropylmalate dehydratase large subunit OS=Pseudomonas veronii 1YdBTEX2                                    | Y | Y | Y | 50696    | 5.5444 | CY | CY | EC     |
| A0A1D3JV37 | Uncharacterized protein OS=Pseudomonas veronii 1YdBTEX2                                                        | Y |   |   | 24180.41 | 9.77   | CY | CY | S      |
| A0A1D3JV41 | TonB-dependent receptor OS=Pseudomonas veronii 1YdBTEX2                                                        | Y | Y | Y | 85753    | 5.25   | OM | OM | PH     |
| A0A1D3JV48 | Acetyl-coenzyme A carboxylase carboxyl transferase subunit beta OS=Pseudomonas veronii 1YdBTEX2                | Y |   |   | 33382    | 8.2705 | CY | CY | I      |
| A0A1D3JV62 | Uncharacterized protein OS=Pseudomonas veronii 1YdBTEX2                                                        | Y |   |   | 36563.39 | 6.25   | CY | UK | S      |
| A0A1D3JV63 | Uncharacterized protein OS=Pseudomonas veronii 1YdBTEX2                                                        | Y |   |   | 54123.76 | 7.56   | CY | CY | S      |
| A0A1D3JV75 | Dihydrolipoyl dehydrogenase OS=Pseudomonas veronii 1YdBTEX2                                                    |   | Y | Y | 48777    | 6.4336 | UK | CY | C      |
| A0A1D3JV78 | Translation initiation factor IF-3 OS=Pseudomonas veronii 1YdBTEX2                                             | Y |   |   | 20066    | 9.9023 | CY | CY | J      |
| A0A1D3JV86 | 2-oxoisovalerate dehydrogenase subunit alpha OS=Pseudomonas veronii 1YdBTEX2                                   | Y | Y | Y | 45043    | 5.8594 | CY | CY | IC     |
| A0A1D3JV89 | Branched-chain amino acid ABC transporter substrate-binding protein OS=Pseudomonas veronii 1YdBTEX2            | Y |   |   | 40195.48 | 5.86   | PR | CY | E      |
| A0A1D3JV93 | Phosphate import ATP-binding protein PstB OS=Pseudomonas veronii 1YdBTEX2                                      | Y |   |   | 28182.4  | 8.29   | CY | IM | PE(mx) |
| A0A1D3JVA1 | Uncharacterized protein OS=Pseudomonas veronii 1YdBTEX2                                                        |   | Y | Y | 23214    | 4.9878 | OM | EX | FT     |
| A0A1D3JVA7 | Dihydrolipoamide acetyltransferase component of pyruvate dehydrogenase complex OS=Pseudomonas veronii 1YdBTEX2 | Y | Y | Y | 45000    | 5.8945 | CY | CY | CI     |
| A0A1D3JVA8 | Membrane protein OS=Pseudomonas veronii 1YdBTEX2                                                               |   | Y | Y | 42373    | 4.6743 | OM | OM | M      |
| A0A1D3JVA9 | GntR family transcriptional regulator OS=Pseudomonas veronii 1YdBTEX2                                          | Y |   |   | 28734.7  | 6.22   | CY | CY | K      |

|            |                                                                                                     |   |   |   |          |        |    |    |        |
|------------|-----------------------------------------------------------------------------------------------------|---|---|---|----------|--------|----|----|--------|
| A0A1D3JVB2 | 2-oxoisovalerate dehydrogenase subunit beta<br>OS=Pseudomonas veronii 1YdBTEX2                      | Y |   | Y | 38408    | 4.96   | CY | CY | CGH    |
| A0A1D3JVB3 | Amino acid ABC transporter substrate-binding protein<br>OS=Pseudomonas veronii 1YdBTEX2             | Y |   | Y | 32896    | 4.7988 | PR | PR | ET     |
| A0A1D3JVC4 | Hcp1 family type VI secretion system effector<br>OS=Pseudomonas veronii 1YdBTEX2                    | Y |   | Y | 10018    | 8.5898 | CY | EX | X      |
| A0A1D3JVC5 | Membrane protein OS=Pseudomonas veronii 1YdBTEX2                                                    | Y | Y | Y | 34907    | 5.7832 | OM | UK | DZ(mx) |
| A0A1D3JVD0 | Cytochrome C OS=Pseudomonas veronii 1YdBTEX2                                                        |   | Y | Y | 16392    | 5.1475 | PR | UK | CT     |
| A0A1D3JVD1 | Quinoprotein ethanol dehydrogenase OS=Pseudomonas veronii 1YdBTEX2                                  |   | Y | Y | 69501    | 6.7207 | OM | PR | CH     |
| A0A1D3JVD3 | Aldehyde dehydrogenase OS=Pseudomonas veronii 1YdBTEX2                                              | Y | Y | Y | 55001    | 5.3672 | CY | CY | CK     |
| A0A1D3JVD5 | Sulfur oxidation protein SoxZ OS=Pseudomonas veronii 1YdBTEX2                                       |   |   | Y | 27640    | 5.0669 | PR | CY | S      |
| A0A1D3JVF7 | Porin-like protein GalP OS=Pseudomonas veronii 1YdBTEX2                                             | Y | Y | Y | 42987.21 | 6.17   | OM | OM | S      |
| A0A1D3JVI5 | Branched-chain-amino-acid aminotransferase<br>OS=Pseudomonas veronii 1YdBTEX2                       | Y | Y | Y | 36830    | 5.8887 | CY | CY | E      |
| A0A1D3JVK4 | Quinoprotein ethanol dehydrogenase OS=Pseudomonas veronii 1YdBTEX2                                  |   | Y | Y | 64522    | 8.0405 | PR | PR | GC     |
| A0A1D3JVL2 | ATP-dependent Clp protease proteolytic subunit<br>OS=Pseudomonas veronii 1YdBTEX2                   | Y | Y | Y | 23420    | 5.2485 | CY | CY | OUT    |
| A0A1D3JVM1 | Peptidylprolyl isomerase OS=Pseudomonas veronii 1YdBTEX2                                            | Y | Y | Y | 68710    | 5.0098 | OM | IM | OM     |
| A0A1D3JVM7 | 2_4-dienoyl-CoA reductase [NADPH] OS=Pseudomonas veronii 1YdBTEX2                                   |   |   | Y | 72979    | 6.6445 | CY | CY | C      |
| A0A1D3JVN9 | ATP-dependent Clp protease ATP-binding subunit ClpX<br>OS=Pseudomonas veronii 1YdBTEX2              | Y | Y | Y | 46937    | 4.9292 | CY | CY | OF(mx) |
| A0A1D3JVP1 | Lon protease OS=Pseudomonas veronii 1YdBTEX2                                                        | Y | Y | Y | 88828.01 | 5.61   | CY | CY | OT(mx) |
| A0A1D3JVP7 | Chemotaxis protein OS=Pseudomonas veronii 1YdBTEX2                                                  | Y | Y | Y | 58132    | 4.7593 | IM | IM | NT(mx) |
| A0A1D3JVQ0 | Gamma-carboxygeranoyl-CoA hydratase OS=Pseudomonas veronii 1YdBTEX2                                 | Y | Y | Y | 29401    | 5.644  | CY | CY | IHE    |
| A0A1D3JVQ9 | Branched-chain amino acid ABC transporter substrate-binding protein OS=Pseudomonas veronii 1YdBTEX2 |   | Y | Y | 43111    | 5.9839 | PR | UK | E      |

|            |                                                                                              |   |   |   |          |        |    |             |        |
|------------|----------------------------------------------------------------------------------------------|---|---|---|----------|--------|----|-------------|--------|
| A0A1D3JVR7 | Beta-lactamase OS=Pseudomonas veronii 1YdBTEX2                                               |   | Y | Y | 34183    | 5.1929 | IM | UK          | PQ     |
| A0A1D3JVR8 | Cysteine--tRNA ligase OS=Pseudomonas veronii 1YdBTEX2                                        | Y |   |   | 51619.61 | 5.48   | CY | CY          | J      |
| A0A1D3JVS3 | Biotin carboxylase OS=Pseudomonas veronii 1YdBTEX2                                           | Y | Y | Y | 68554    | 5.2808 | CY | CY          | IF(mx) |
| A0A1D3JVS5 | Membrane protein OS=Pseudomonas veronii 1YdBTEX2                                             |   | Y | Y | 45848.11 | 8.5    | OM | IM          | MP     |
| A0A1D3JVS6 | Methylcrotonoyl-CoA carboxylase beta chain_<br>mitochondrial OS=Pseudomonas veronii 1YdBTEX2 | Y | Y | Y | 57377    | 6.4204 | CY | CY          | I      |
| A0A1D3JVT4 | Peptidyl-prolyl cis-trans isomerase OS=Pseudomonas<br>veronii 1YdBTEX2                       |   | Y | Y | 18212    | 5.5972 | CY | CY          | O      |
| A0A1D3JVT8 | Autotransporter assembly factor TamA OS=Pseudomonas<br>veronii 1YdBTEX2                      | Y |   |   | 61020    | 6.19   | PR | OM          | MU     |
| A0A1D3JVU1 | Major tail tube protein OS=Pseudomonas veronii 1YdBTEX2                                      | Y | Y | Y | 18080.1  | 5.49   | CY | UK          | S      |
| A0A1D3JVU7 | Glutamine--tRNA ligase OS=Pseudomonas veronii                                                | Y | Y | Y | 64514    | 5.8491 | CY | CY          | J      |
| A0A1D3JVV0 | NADH-quinone oxidoreductase OS=Pseudomonas veronii<br>1YdBTEX2                               | Y |   | Y | 98237.33 | 5.4    | CY | ML (C, IM)  | C      |
| A0A1D3JVV9 | NADH-quinone oxidoreductase subunit C/D<br>OS=Pseudomonas veronii 1YdBTEX2                   | Y | Y |   | 67604    | 5.9502 | CY | CY          | C      |
| A0A1D3JVW1 | Trigger factor OS=Pseudomonas veronii 1YdBTEX2                                               | Y | Y | Y | 48288    | 4.5747 | CY | CY          | DO     |
| A0A1D3JVX6 | NADH-quinone oxidoreductase subunit F OS=Pseudomonas<br>veronii 1YdBTEX2                     | Y |   | Y | 48828    | 7.1118 | CY | ML (CY, IM) | C      |
| A0A1D3JVY0 | Probable transcriptional regulatory protein PVE_R1G2279<br>OS=Pseudomonas veronii 1YdBTEX2   | Y | Y | Y | 25214.8  | 4.85   | CY | CY          | K      |
| A0A1D3JVY4 | NADH-quinone oxidoreductase subunit B OS=Pseudomonas<br>veronii 1YdBTEX2                     | Y |   |   | 25411.58 | 5.19   | CY | IM          | C      |
| A0A1D3JVY8 | NADH dehydrogenase I subunit E OS=Pseudomonas veronii<br>1YdBTEX2                            |   | Y | Y | 18032    | 4.522  | CY | CY          | C      |
| A0A1D3JVZ1 | Uncharacterized protein ZMO1242 OS=Pseudomonas<br>veronii 1YdBTEX2                           | Y | Y | Y | 43321    | 6.0073 | UK | CY          | E      |
| A0A1D3JW15 | tRNA-cytidine(32) 2-sulfurtransferase OS=Pseudomonas<br>veronii 1YdBTEX2                     | Y | Y |   | 31093.94 | 6.9    | CY | CY          | FD(mx) |
| A0A1D3JW24 | Uncharacterized protein OS=Pseudomonas veronii<br>1YdBTEX2                                   |   | Y |   | 11495    | 6.3267 | EX | UK          | X      |
| A0A1D3JW27 | Peroxiredoxin OS=Pseudomonas veronii 1YdBTEX2                                                | Y | Y | Y | 16768    | 5.0288 | UK | PR          | CO     |
| A0A1D3JW33 | Peroxidase OS=Pseudomonas veronii 1YdBTEX2                                                   |   |   | Y | 31070    | 4.6787 | CY | CY          | P      |

|            |                                                                                |   |   |   |          |        |    |    |        |
|------------|--------------------------------------------------------------------------------|---|---|---|----------|--------|----|----|--------|
| A0A1D3JW46 | ABC transporter substrate-binding protein<br>OS=Pseudomonas veronii 1YdBTEX2   | Y |   | Y | 64816    | 5.8125 | EX | OM | EP     |
| A0A1D3JW48 | Isovaleryl-CoA dehydrogenase_ mitochondrial<br>OS=Pseudomonas veronii 1YdBTEX2 | Y | Y | Y | 42340    | 5.4829 | CY | CY | I      |
| A0A1D3JW51 | Aldose 1-epimerase OS=Pseudomonas veronii 1YdBTEX2                             | Y |   |   | 41454    | 7.0811 | PR | PR | G      |
| A0A1D3JW53 | Isocitrate OS=Pseudomonas veronii 1YdBTEX2                                     | Y | Y | Y | 48389    | 5.2559 | CY | CY | CG     |
| A0A1D3JW69 | Serine--tRNA ligase OS=Pseudomonas veronii 1YdBTEX2                            | Y |   |   | 46786    | 5.0918 | CY | CY | J      |
| A0A1D3JW75 | Disulfide-bond oxidoreductase YghU OS=Pseudomonas<br>veronii 1YdBTEX2          | Y | Y | Y | 31018.84 | 5.9    | CY | CY | OH     |
| A0A1D3JW78 | Glycos_trans_3N domain-containing protein<br>OS=Pseudomonas veronii 1YdBTEX2   | Y |   |   | 37091.16 | 5.92   | CY | CY | EF     |
| A0A1D3JW79 | General secretion pathway protein M OS=Pseudomonas<br>veronii 1YdBTEX2         | Y |   |   | 18354.6  | 9.68   | IM | IM | U      |
| A0A1D3JW89 | Aldehyde dehydrogenase OS=Pseudomonas veronii<br>1YdBTEX2                      | Y |   | Y | 59606    | 6.1816 | CY | CY | CE     |
| A0A1D3JWA4 | Arylesterase OS=Pseudomonas veronii 1YdBTEX2                                   | Y | Y | Y | 29815    | 5.061  | CY | CY | IQ(mx) |
| A0A1D3JWA5 | Protein-tyrosine-phosphatase OS=Pseudomonas veronii<br>1YdBTEX2                |   |   | Y | 17232    | 5.0625 | CY | CY | TKQ    |
| A0A1D3JWB7 | Membrane protein OS=Pseudomonas veronii 1YdBTEX2                               | Y | Y |   | 59739.63 | 5.27   | OM | OM | KP     |
| A0A1D3JWC1 | Uncharacterized protein OS=Pseudomonas veronii<br>1YdBTEX2                     |   |   | Y | 10743    | 6.3164 | CY | UK | S      |
| A0A1D3JWC4 | Denitrification regulatory protein NirQ OS=Pseudomonas<br>veronii 1YdBTEX2     | Y |   |   | 28964.83 | 5.8    | CY | CY | HO(mx) |
| A0A1D3JWC5 | Isocitrate dehydrogenase [NADP] OS=Pseudomonas veronii<br>1YdBTEX2             | Y | Y | Y | 45472    | 5.1226 | CY | CY | CE     |
| A0A1D3JWD4 | AraC family transcriptional regulator OS=Pseudomonas<br>veronii 1YdBTEX2       | Y |   |   | 27904    | 6.7881 | CY | CY | KTG    |
| A0A1D3JWE2 | Siroheme decarboxylase OS=Pseudomonas veronii<br>1YdBTEX2                      | Y |   |   | 18874.79 | 8.93   | CY | CY | K      |
| A0A1D3JWF2 | DnrE protein OS=Pseudomonas veronii 1YdBTEX2                                   | Y | Y | Y | 25491.71 | 9.29   | CY | CY | KT     |
| A0A1D3JWI4 | Methyl-accepting chemotaxis protein OS=Pseudomonas<br>veronii 1YdBTEX2         | Y | Y | Y | 57991    | 4.9131 | IM | IM | NT(mx) |

|            |                                                                                                |   |   |   |          |        |    |             |        |
|------------|------------------------------------------------------------------------------------------------|---|---|---|----------|--------|----|-------------|--------|
| A0A1D3JWJ9 | L-lactate dehydrogenase OS=Pseudomonas veronii 1YdBTEX2                                        |   |   | Y | 42057    | 7.9834 | CY | CY          | Cl(mx) |
| A0A1D3JWK9 | Iditol 2-dehydrogenase OS=Pseudomonas veronii 1YdBTEX2                                         | Y | Y | Y | 41095.86 | 5.74   | CY | CY          | CE     |
| A0A1D3JWL0 | Transketolase OS=Pseudomonas veronii 1YdBTEX2                                                  |   | Y |   | 74337    | 5.6221 | CY | CY          | GC     |
| A0A1D3JWL4 | Nitrite reductase OS=Pseudomonas veronii 1YdBTEX2                                              | Y | Y | Y | 61256    | 8.543  | PR | PR          | CO     |
| A0A1D3JWM0 | Molybdenum cofactor biosynthesis protein B OS=Pseudomonas veronii 1YdBTEX2                     |   |   | Y | 19928    | 5.1167 | CY | CY          | H      |
| A0A1D3JWM5 | Protein NorD OS=Pseudomonas veronii 1YdBTEX2                                                   | Y |   |   | 69732.04 | 7.67   | PR | CY          | PO(mx) |
| A0A1D3JWM7 | D-beta-hydroxybutyrate dehydrogenase OS=Pseudomonas veronii 1YdBTEX2                           | Y |   |   | 26539.77 | 5.41   | PR | CY          | IQ     |
| A0A1D3JWN2 | ABC transporter substrate-binding protein OS=Pseudomonas veronii 1YdBTEX2                      | Y |   |   | 30872    | 6.0718 | EX | OM          | EP(mx) |
| A0A1D3JWQ7 | Uncharacterized protein y4wM OS=Pseudomonas veronii 1YdBTEX2                                   |   |   | Y | 69217    | 5.8696 | PR | ML (CY, PR) | E      |
| A0A1D3JWQ8 | Uncharacterized protein OS=Pseudomonas veronii 1YdBTEX2                                        | Y |   | Y | 35432.99 | 5.54   | PR | UK          | FG     |
| A0A1D3JWR0 | ABC transporter substrate-binding protein OS=Pseudomonas veronii 1YdBTEX2                      |   |   | Y | 69737    | 5.4961 | PR | PR          | E      |
| A0A1D3JWR4 | Chromate reductase OS=Pseudomonas veronii 1YdBTEX2                                             | Y | Y | Y | 19761    | 7.3784 | PR | CY          | KI     |
| A0A1D3JWR5 | General secretion pathway protein GspG OS=Pseudomonas veronii 1YdBTEX2                         | Y | Y | Y | 16298.32 | 5.28   | IM | IM          | NU     |
| A0A1D3JWT3 | Ribose/galactose/methyl galactoside import ATP-binding protein OS=Pseudomonas veronii 1YdBTEX2 | Y |   |   | 53406.75 | 6.44   | UK | IM          | EV(mx) |
| A0A1D3JWU0 | Oxidoreductase OS=Pseudomonas veronii 1YdBTEX2                                                 |   | Y |   | 18798    | 4.7051 | CY | CY          | EH     |
| A0A1D3JWU1 | Type VI secretion protein ImpG OS=Pseudomonas veronii 1YdBTEX2                                 | Y | Y | Y | 66999.47 | 6.12   | CY | CY          | S      |
| A0A1D3JWU2 | IclR family transcriptional regulator OS=Pseudomonas veronii 1YdBTEX2                          |   |   | Y | 28428    | 5.8872 | CY | CY          | K      |
| A0A1D3JWU4 | Nitrous-oxide reductase OS=Pseudomonas veronii 1YdBTEX2                                        | Y | Y | Y | 70213    | 5.9575 | PR | PR          | CQP    |
| A0A1D3JWU5 | L-methionine gamma-lyase OS=Pseudomonas veronii 1YdBTEX2                                       | Y | Y | Y | 44506    | 6.6035 | UK | CY          | EP     |

|            |                                                                                                   |   |   |   |          |        |    |            |        |
|------------|---------------------------------------------------------------------------------------------------|---|---|---|----------|--------|----|------------|--------|
| A0A1D3JWV4 | Nitrate reductase (quinone) OS=Pseudomonas veronii 1YdBTEX2                                       | Y | Y | Y | 140747   | 6.104  | CY | ML (C, IM) | C      |
| A0A1D3JWV7 | Peptidylprolyl isomerase OS=Pseudomonas veronii 1YdBTEX2                                          | Y | Y | Y | 9865     | 5.4727 | CY | CY         | O      |
| A0A1D3JWX1 | 3D-(3_5/4)-trihydroxycyclohexane-1_2-dione hydrolase OS=Pseudomonas veronii 1YdBTEX2              | Y |   |   | 69664.47 | 5.68   | CY | CY         | EH     |
| A0A1D3JWX5 | Acetoin:2_6-dichlorophenolindophenol oxidoreductase subunit alpha OS=Pseudomonas veronii 1YdBTEX2 | Y |   | Y | 34388    | 5.2427 | CY | CY         | IG     |
| A0A1D3JWX6 | Methyl-accepting chemotaxis protein OS=Pseudomonas veronii 1YdBTEX2                               | Y | Y | Y | 57752    | 5.8198 | IM | IM         | NT(mx) |
| A0A1D3JWY3 | SCP-2 family sterol carrier protein OS=Pseudomonas veronii 1YdBTEX2                               |   | Y |   | 11059    | 3.9917 | CY | UK         | IQ     |
| A0A1D3JWY7 | Uncharacterized protein OS=Pseudomonas veronii 1YdBTEX2                                           | Y | Y | Y | 21052.62 | 6.71   | CY | CY         | E      |
| A0A1D3JWZ7 | Rhizopine-binding protein OS=Pseudomonas veronii 1YdBTEX2                                         | Y | Y | Y | 33598    | 8.8008 | PR | PR         | G      |
| A0A1D3JX08 | ABC transporter substrate-binding protein OS=Pseudomonas veronii 1YdBTEX2                         |   |   | Y | 36811    | 5.6426 | PR | PR         | E      |
| A0A1D3JX27 | Acetoin:2_6-dichlorophenolindophenol oxidoreductase subunit beta OS=Pseudomonas veronii 1YdBTEX2  |   |   | Y | 36805    | 4.8296 | CY | CY         | CH     |
| A0A1D3JX36 | 3-carboxymuconate cyclase OS=Pseudomonas veronii 1YdBTEX2                                         |   |   | Y | 42071    | 6.4204 | PR | PR         | GO     |
| A0A1D3JX42 | von Willebrand factor A OS=Pseudomonas veronii 1YdBTEX2                                           | Y | Y | Y | 40132.58 | 8.85   | IM | IM         | MH(mx) |
| A0A1D3JX46 | Glutamate dehydrogenase OS=Pseudomonas veronii 1YdBTEX2                                           | Y | Y | Y | 181917   | 5.3818 | CY | IM         | E      |
| A0A1D3JX49 | Aconitate hydratase B OS=Pseudomonas veronii 1YdBTEX2                                             | Y | Y | Y | 94118    | 5.0757 | CY | CY         | CE     |
| A0A1D3JX53 | Pyruvate dehydrogenase [ubiquinone] OS=Pseudomonas veronii 1YdBTEX2                               | Y | Y | Y | 62006.66 | 5.58   | PR | ML (C, IM) | EH     |
| A0A1D3JX55 | Universal stress protein A OS=Pseudomonas veronii 1YdBTEX2                                        | Y |   |   | 31106.45 | 5.75   | CY | CY         | T      |
| A0A1D3JXE2 | Glycogen operon protein GlgX homolog OS=Pseudomonas veronii 1YdBTEX2                              | Y | Y | Y | 81728    | 5.1533 | CY | CY         | G      |

|            |                                                                              |   |   |   |          |        |    |    |        |
|------------|------------------------------------------------------------------------------|---|---|---|----------|--------|----|----|--------|
| A0A1D3JXE5 | Chemotaxis protein OS=Pseudomonas veronii 1YdBTEX2                           | Y |   |   | 56128    | 5.9619 | IM | IM | NT(mx) |
| A0A1D3JXF1 | Uncharacterized protein OS=Pseudomonas veronii 1YdBTEX2                      | Y |   |   | 5537.88  | 9.51   | UK | UK | S      |
| A0A1D3JXF4 | TonB-dependent receptor OS=Pseudomonas veronii 1YdBTEX2                      | Y | Y | Y | 78594    | 4.8794 | OM | OM | PH     |
| A0A1D3JXG1 | Biotin carboxylase OS=Pseudomonas veronii 1YdBTEX2                           | Y | Y | Y | 61095    | 5.5371 | UK | CY | IC     |
| A0A1D3JXG4 | 5-oxoprolinase subunit A OS=Pseudomonas veronii 1YdBTEX2                     | Y |   |   | 26823    | 6.4951 | CY | UK | S      |
| A0A1D3JXH4 | HTH luxR-type domain-containing protein OS=Pseudomonas veronii 1YdBTEX2      | Y |   |   | 95930.06 | 6.81   | CY | CY | KT     |
| A0A1D3JXH6 | Alpha/beta hydrolase OS=Pseudomonas veronii 1YdBTEX2                         |   |   | Y | 41671    | 7.2    | PR | UK | IC     |
| A0A1D3JXK1 | Methylhydantoinase OS=Pseudomonas veronii 1YdBTEX2                           | Y | Y | Y | 59189    | 4.8721 | EX | CY | EQ     |
| A0A1D3JXK8 | Uncharacterized protein OS=Pseudomonas veronii 1YdBTEX2                      | Y | Y | Y | 56087    | 5.5811 | CY | CY | E      |
| A0A1D3JXL3 | Uncharacterized protein OS=Pseudomonas veronii 1YdBTEX2                      | Y | Y | Y | 12383    | 9.3237 | PR | UK | M      |
| A0A1D3JXM3 | Alkyl hydroperoxide reductase C OS=Pseudomonas veronii 1YdBTEX2              | Y | Y | Y | 20438    | 4.7695 | UK | CY | O      |
| A0A1D3JXN6 | 4-hydroxyphenylpyruvate dioxygenase OS=Pseudomonas veronii 1YdBTEX2          | Y |   | Y | 40163    | 4.8076 | CY | CY | E      |
| A0A1D3JXQ1 | Uncharacterized protein OS=Pseudomonas veronii 1YdBTEX2                      | Y | Y | Y | 24073    | 9.5464 | PR | UK | S      |
| A0A1D3JXQ3 | Uncharacterized protein OS=Pseudomonas veronii 1YdBTEX2                      | Y | Y | Y | 17261    | 5.9414 | CY | CY | X      |
| A0A1D3JXQ4 | UTP--glucose-1-phosphate uridylyltransferase OS=Pseudomonas veronii 1YdBTEX2 | Y | Y | Y | 30912    | 5.1519 | CY | CY | JM     |
| A0A1D3JXR9 | Transcriptional regulator OS=Pseudomonas veronii 1YdBTEX2                    | Y | Y | Y | 13321    | 10.084 | CY | CY | I      |
| A0A1D3JXS0 | Probable acetyl-CoA acetyltransferase OS=Pseudomonas veronii 1YdBTEX2        | Y | Y | Y | 40823    | 6.394  | CY | CY | I      |
| A0A1D3JXT0 | UDP-glucose 6-dehydrogenase OS=Pseudomonas veronii 1YdBTEX2                  | Y |   |   | 51004    | 5.5913 | UK | CY | M      |

|            |                                                                                |   |   |   |          |        |    |    |        |
|------------|--------------------------------------------------------------------------------|---|---|---|----------|--------|----|----|--------|
| A0A1D3JXT3 | Uncharacterized protein OS=Pseudomonas veronii 1YdBTEX2                        |   | Y |   | 29956    | 4.4385 | OM | UK | S      |
| A0A1D3JXT7 | Acyl-CoA dehydrogenase OS=Pseudomonas veronii 1YdBTEX2                         | Y |   | Y | 40594    | 5.0845 | CY | CY | I      |
| A0A1D3JXU0 | Histidine kinase OS=Pseudomonas veronii 1YdBTEX2                               | Y | Y | Y | 57737    | 5.0435 | IM | IM | NT(mx) |
| A0A1D3JXW0 | Uncharacterized protein OS=Pseudomonas veronii 1YdBTEX2                        |   |   | Y | 21016    | 5.2676 | CY | UK | S      |
| A0A1D3JXW3 | Bifunctional polymyxin resistance protein ArnA OS=Pseudomonas veronii 1YdBTEX2 | Y |   | Y | 74164    | 6.4746 | UK | CY | GM     |
| A0A1D3JXX3 | Trehalose synthase OS=Pseudomonas veronii 1YdBTEX2                             | Y |   |   | 75721.58 | 5.33   | CY | CY | G      |
| A0A1D3JXY5 | Aldehyde-activating protein OS=Pseudomonas veronii 1YdBTEX2                    | Y | Y | Y | 16947    | 6.0425 | UK | PR | S      |
| A0A1D3JY00 | Acyl-CoA dehydrogenase OS=Pseudomonas veronii 1YdBTEX2                         | Y |   | Y | 41589    | 5.4023 | CY | CY | I      |
| A0A1D3JY17 | Chemotaxis protein OS=Pseudomonas veronii 1YdBTEX2                             | Y | Y | Y | 58093    | 5.3848 | IM | IM | NT(mx) |
| A0A1D3JY18 | Uncharacterized protein OS=Pseudomonas veronii 1YdBTEX2                        | Y | Y | Y | 40165    | 5.6353 | IM | IM | I      |
| A0A1D3JY20 | Ribosome association toxin RatA OS=Pseudomonas veronii 1YdBTEX2                |   |   | Y | 16481    | 4.6128 | CY | UK | I      |
| A0A1D3JY28 | Uncharacterized protein OS=Pseudomonas veronii 1YdBTEX2                        | Y | Y | Y | 36406    | 6.3911 | OM | UK | C      |
| A0A1D3JY32 | Uncharacterized protein OS=Pseudomonas veronii 1YdBTEX2                        |   | Y |   | 18261    | 4.3037 | CY | CY | K      |
| A0A1D3JY35 | NADP-dependent oxidoreductase OS=Pseudomonas veronii 1YdBTEX2                  | Y |   |   | 36993    | 5.4272 | CY | CY | C      |
| A0A1D3JY37 | Heat-shock protein OS=Pseudomonas veronii 1YdBTEX2                             | Y | Y |   | 20428    | 6.3545 | CY | CY | O      |
| A0A1D3JY38 | Short-chain dehydrogenase OS=Pseudomonas veronii 1YdBTEX2                      | Y |   |   | 29457.86 | 9.15   | UK | CY | IQ     |
| A0A1D3JY39 | Fe(3+)-pyochelin receptor OS=Pseudomonas veronii 1YdBTEX2                      |   | Y | Y | 78087    | 5.6279 | OM | OM | PH     |
| A0A1D3JY42 | GFO_IDH_MocA domain-containing protein OS=Pseudomonas veronii 1YdBTEX2         | Y | Y | Y | 37548    | 5.8887 | CY | UK | T      |
| A0A1D3JY45 | 60 kDa chaperonin OS=Pseudomonas veronii 1YdBTEX2                              | Y | Y | Y | 56925.12 | 5.15   | CY | CY | O      |

|            |                                                                             |   |   |   |          |        |    |         |        |
|------------|-----------------------------------------------------------------------------|---|---|---|----------|--------|----|---------|--------|
| A0A1D3JY51 | Phosphoribosyl transferase OS=Pseudomonas veronii 1YdBTEX2                  | Y | Y | Y | 25309    | 5.1445 | CY | UK      | QF     |
| A0A1D3JY52 | Acetylornithine aminotransferase OS=Pseudomonas veronii 1YdBTEX2            | Y | Y | Y | 44912    | 6.3208 | CY | CY      | EH     |
| A0A1D3JY58 | Beta-Casp domain-containing protein OS=Pseudomonas veronii 1YdBTEX2         | Y | Y | Y | 51001    | 6.3765 | UK | CY      | JP     |
| A0A1D3JY66 | Probable enoyl-CoA hydratase OS=Pseudomonas veronii 1YdBTEX2                | Y | Y | Y | 27758    | 5.2939 | CY | CY      | IH(mx) |
| A0A1D3JY68 | Esterase OS=Pseudomonas veronii 1YdBTEX2                                    | Y | Y | Y | 38026    | 5.2178 | EX | CY      | CI     |
| A0A1D3JY71 | Biofilm dispersion protein BdlA OS=Pseudomonas veronii 1YdBTEX2             | Y |   | Y | 49423    | 5.9678 | CY | ML (UK) | NT(mx) |
| A0A1D3JY75 | Hypothetical secreted protein OS=Pseudomonas veronii 1YdBTEX2               | Y | Y | Y | 8954     | 9.8804 | PR | OM      | S      |
| A0A1D3JY85 | Uncharacterized protein OS=Pseudomonas veronii 1YdBTEX2                     | Y | Y | Y | 59879    | 9.7354 | IM | IM      | VE(mx) |
| A0A1D3JY92 | Alcohol dehydrogenase OS=Pseudomonas veronii 1YdBTEX2                       | Y | Y |   | 37431    | 5.3042 | CY | CY      | CP(mx) |
| A0A1D3JYA8 | Hypothetical secreted protein OS=Pseudomonas veronii 1YdBTEX2               | Y | Y | Y | 9010     | 7.3184 | PR | OM      | S      |
| A0A1D3JYB7 | Universal stress protein OS=Pseudomonas veronii 1YdBTEX2                    | Y | Y | Y | 33891    | 5.6001 | UK | CY      | T      |
| A0A1D3JYC9 | Phosphoglucomutase OS=Pseudomonas veronii 1YdBTEX2                          | Y | Y |   | 58779    | 5.5239 | CY | CY      | GK     |
| A0A1D3JYD7 | Uncharacterized protein OS=Pseudomonas veronii 1YdBTEX2                     |   |   | Y | 4724     | 3.3413 | UK | UK      | S      |
| A0A1D3JYG5 | Quercetin 2_3-dioxygenase PA1210 OS=Pseudomonas veronii 1YdBTEX2            | Y |   | Y | 25284    | 5.5825 | CY | CY      | OL     |
| A0A1D3JYH3 | Acetyltransferase PA5475 OS=Pseudomonas veronii 1YdBTEX2                    | Y |   |   | 21135    | 6.0498 | CY | CY      | ME     |
| A0A1D3JYH4 | LysR family transcriptional regulator OS=Pseudomonas veronii 1YdBTEX2       | Y |   |   | 35145.22 | 6.7    | CY | CY      | K      |
| A0A1D3JYJ0 | 2-hydroxymuconic semialdehyde dehydrogenase OS=Pseudomonas veronii 1YdBTEX2 | Y |   |   | 52872.45 | 5.84   | CY | CY      | C      |

|            |                                                                                       |   |   |   |          |         |    |              |     |
|------------|---------------------------------------------------------------------------------------|---|---|---|----------|---------|----|--------------|-----|
| A0A1D3JYJ6 | 2-hydroxyhexa-2_4-dienoate hydratase OS=Pseudomonas veronii 1YdBTEX2                  |   | Y | Y | 28433.66 | 4.98    | CY | UK           | Q   |
| A0A1D3JYN7 | Phenol hydroxylase P1 protein OS=Pseudomonas veronii 1YdBTEX2                         |   |   | Y | 37542    | 4.7241  | CY | UK           | C   |
| A0A1D3JYP8 | Aldehyde dehydrogenase PuuC OS=Pseudomonas veronii 1YdBTEX2                           | Y | Y | Y | 53525    | 5.2046  | CY | CY           | CEK |
| A0A1D3JYP9 | Spermidine/putrescine import ATP-binding protein PotA OS=Pseudomonas veronii 1YdBTEX2 | Y | Y | Y | 42409.75 | 6.15    | CY | IM           | PE  |
| A0A1D3JYR3 | 3-phenylpropionate dioxygenase OS=Pseudomonas veronii 1YdBTEX2                        | Y |   |   | 20583    | 7.3579  | CY | CY           | Q   |
| A0A1D3JYR4 | 2-hydroxymuconate tautomerase OS=Pseudomonas veronii 1YdBTEX2                         |   | Y | Y | 15693    | 5.1958  | CY | CY           | S   |
| A0A1D3JYS7 | Chemotaxis protein OS=Pseudomonas veronii 1YdBTEX2                                    | Y | Y |   | 58446.94 | 5.74    | IM | IM           | NT  |
| A0A1D3JYS9 | Gamma-glutamylputrescine synthetase PuuA OS=Pseudomonas veronii 1YdBTEX2              | Y | Y | Y | 50887    | 4.667   | CY | CY           | E   |
| A0A1D3JYX3 | C4-dicarboxylate-binding periplasmic protein OS=Pseudomonas veronii 1YdBTEX2          | Y | Y |   | 36837    | 8.8799  | PR | PR           | GQ  |
| A0A1D3JYX6 | 50S ribosomal protein L21 OS=Pseudomonas veronii 1YdBTEX2                             | Y | Y | Y | 18992.34 | 6.53    | CY | CY           | J   |
| A0A1D3JYY5 | Sugar ABC transporter substrate-binding protein OS=Pseudomonas veronii 1YdBTEX2       | Y |   |   | 33334    | 10.7227 | UK | PR           | PT  |
| A0A1D3JYZ2 | Uncharacterized protein OS=Pseudomonas veronii 1YdBTEX2                               | Y | Y | Y | 13950.67 | 4.53    | EX | UK           | X   |
| A0A1D3JYZ4 | Phenol hydroxylase OS=Pseudomonas veronii 1YdBTEX2                                    |   | Y | Y | 13234    | 5.877   | CY | UK           | Q   |
| A0A1D3JYZ7 | Gamma-glutamyltranspeptidase OS=Pseudomonas veronii 1YdBTEX2                          | Y | Y | Y | 60932    | 6.2212  | OM | PR           | E   |
| A0A1D3JYZ8 | TetR family transcriptional regulator OS=Pseudomonas veronii 1YdBTEX2                 |   |   | Y | 21961    | 5.1724  | CY | CY           | K   |
| A0A1D3JZ06 | Maltokinase OS=Pseudomonas veronii 1YdBTEX2                                           | Y | Y | Y | 125167.5 | 5.69    | CY | L (C, IM, O) | GM  |
| A0A1D3JZ09 | Uncharacterized protein OS=Pseudomonas veronii 1YdBTEX2                               | Y |   |   | 8617.15  | 4.21    | CY | CY           | S   |
| A0A1D3JZ13 | Uncharacterized oxidoreductase YgfF OS=Pseudomonas veronii 1YdBTEX2                   | Y | Y | Y | 26164.64 | 7.2     | UK | CY           | IQ  |

|            |                                                                                    |   |   |   |          |        |    |            |        |
|------------|------------------------------------------------------------------------------------|---|---|---|----------|--------|----|------------|--------|
| A0A1D3JZ21 | Thiol peroxidase OS=Pseudomonas veronii 1YdBTEX2                                   | Y | Y | Y | 17643    | 4.3228 | CY | PR         | O      |
| A0A1D3JZ23 | Sugar ABC transporter substrate-binding protein<br>OS=Pseudomonas veronii 1YdBTEX2 | Y | Y | Y | 48187    | 6.5244 | PR | UK         | G      |
| A0A1D3JZ40 | Methyltransferase OS=Pseudomonas veronii 1YdBTEX2                                  |   | Y | Y | 27870.26 | 6.3    | CY | CY         | QH(mx) |
| A0A1D3JZ43 | C4-dicarboxylate ABC transporter OS=Pseudomonas veronii<br>1YdBTEX2                |   |   | Y | 33431    | 7.3594 | OM | UK         | GP(mx) |
| A0A1D3JZ60 | Uncharacterized protein OS=Pseudomonas veronii<br>1YdBTEX2                         | Y | Y | Y | 11471    | 5.2339 | CY | UK         | T      |
| A0A1D3JZ66 | Uncharacterized protein OS=Pseudomonas veronii<br>1YdBTEX2                         | Y |   |   | 46511    | 4.8296 | OM | UK         | M      |
| A0A1D3JZ78 | Allergen V5/Tpx-1 family protein OS=Pseudomonas veronii<br>1YdBTEX2                | Y |   |   | 27915.8  | 5.56   | PR | UK         | O      |
| A0A1D3JZ92 | Uncharacterized protein OS=Pseudomonas veronii<br>1YdBTEX2                         |   |   | Y | 15244    | 5.3745 | CY | UK         | X      |
| A0A1D3JZA0 | TonB-dependent receptor OS=Pseudomonas veronii<br>1YdBTEX2                         |   | Y | Y | 82573    | 5.1841 | OM | OM         | PH     |
| A0A1D3JZE2 | Ferripyoverdine receptor OS=Pseudomonas veronii<br>1YdBTEX2                        |   | Y | Y | 88987    | 5.0303 | OM | OM         | PH     |
| A0A1D3JZG0 | Photosynthetic protein synthase I OS=Pseudomonas veronii<br>1YdBTEX2               |   | Y |   | 22064    | 6.8452 | CY | UK         | MP(mx) |
| A0A1D3JZG1 | Type IV secretion protein DotU OS=Pseudomonas veronii<br>1YdBTEX2                  |   |   | Y | 24916    | 5.0391 | CY | UK         | S      |
| A0A1D3JZI1 | 2-oxoglutarate dioxygenase (ethylene-forming)<br>OS=Pseudomonas veronii 1YdBTEX2   |   |   | Y | 37791    | 8.0024 | CY | CY         | CQ     |
| A0A1D3JZI9 | Urea ABC transporter ATP-binding protein<br>OS=Pseudomonas veronii 1YdBTEX2        | Y |   |   | 25478.48 | 6.33   | UK | ML (C, IM) | EV(mx) |
| A0A1D3JZJ4 | Chemotaxis protein OS=Pseudomonas veronii 1YdBTEX2                                 | Y | Y | Y | 57552    | 5.1152 | IM | IM         | NTP    |
| A0A1D3JZL5 | 6-phosphogluconate dehydrogenase YqeC<br>OS=Pseudomonas veronii 1YdBTEX2           | Y | Y | Y | 35120    | 5.5854 | OM | UK         | GI     |
| A0A1D3JZN3 | Uncharacterized protein YcaC OS=Pseudomonas veronii<br>1YdBTEX2                    | Y | Y | Y | 22549    | 4.6772 | CY | UK         | Q      |
| A0A1D3JZN4 | Uncharacterized protein OS=Pseudomonas veronii<br>1YdBTEX2                         | Y |   |   | 86800.24 | 6.23   | PR | CY         | UTM    |

|            |                                                                                                          |   |   |   |          |        |    |    |        |
|------------|----------------------------------------------------------------------------------------------------------|---|---|---|----------|--------|----|----|--------|
| A0A1D3JZR0 | Chemotaxis protein OS=Pseudomonas veronii 1YdBTEX2                                                       | Y | Y | Y | 69464    | 4.9541 | IM | IM | NTP    |
| A0A1D3JZS8 | 2_3-dihydroxyphenylpropionate/2_3-dihydroxycinnamic acid 1_2-dioxygenase OS=Pseudomonas veronii 1YdBTEX2 |   |   | Y | 34222    | 5.6089 | PR | UK | CQ     |
| A0A1D3JZT1 | Cell filamentation protein Fic OS=Pseudomonas veronii 1YdBTEX2                                           |   |   | Y | 26152    | 6.0645 | CY | CY | DK     |
| A0A1D3JZT7 | Type IV secretion protein Rhs OS=Pseudomonas veronii 1YdBTEX2                                            | Y | Y | Y | 37504    | 9.145  | EX | CY | M      |
| A0A1D3JZV6 | Mhp operon transcriptional activator OS=Pseudomonas veronii 1YdBTEX2                                     | Y |   |   | 29346    | 6.3618 | CY | CY | KT     |
| A0A1D3JZV9 | Peptidase OS=Pseudomonas veronii 1YdBTEX2                                                                | Y |   |   | 52542.15 | 7      | PR | UK | EO     |
| A0A1D3JZX4 | Glucarate dehydratase OS=Pseudomonas veronii 1YdBTEX2                                                    |   |   | Y | 49257    | 5.644  | CY | CY | M      |
| A0A1D3JZX8 | DeoR family transcriptional regulator OS=Pseudomonas veronii 1YdBTEX2                                    | Y |   |   | 23735.65 | 6.44   | UK | CY | QT(mx) |
| A0A1D3JZZ0 | Methyl-accepting chemotaxis protein McpS OS=Pseudomonas veronii 1YdBTEX2                                 | Y | Y | Y | 68731    | 5.0845 | IM | IM | NT(mx) |
| A0A1D3JZZ6 | Alcohol dehydrogenase_ propanol-preferring OS=Pseudomonas veronii 1YdBTEX2                               | Y | Y | Y | 35559    | 5.981  | UK | CY | CP     |
| A0A1D3K008 | Type VI secretion system protein VgrGA OS=Pseudomonas veronii 1YdBTEX2                                   | Y |   |   | 75868    | 6.0498 | CY | CY | T      |
| A0A1D3K015 | Tli4_C domain-containing protein OS=Pseudomonas veronii 1YdBTEX2                                         |   |   | Y | 46585    | 5.9561 | PR | UK | S      |
| A0A1D3K049 | L-arabinose-binding periplasmic protein OS=Pseudomonas veronii 1YdBTEX2                                  | Y | Y | Y | 35506    | 7.1763 | PR | PR | GK     |
| A0A1D3K060 | Succinate-semialdehyde dehydrogenase [NADP(+)] OS=Pseudomonas veronii 1YdBTEX2                           | Y | Y |   | 49609    | 4.9966 | CY | CY | CE(mx) |
| A0A1D3K076 | Lysine/arginine/ornithine-binding periplasmic protein OS=Pseudomonas veronii 1YdBTEX2                    | Y |   | Y | 28213    | 7.9233 | PR | PR | ET     |
| A0A1D3K077 | 3-oxoadipate CoA-transferase OS=Pseudomonas veronii 1YdBTEX2                                             | Y | Y | Y | 25043    | 5.1035 | CY | CY | I      |
| A0A1D3K079 | Virulence factors putative positive transcription regulator BvgA OS=Pseudomonas veronii 1YdBTEX2         | Y | Y |   | 23017.24 | 8.86   | CY | CY | KT     |
| A0A1D3K096 | DNA topoisomerase OS=Pseudomonas veronii 1YdBTEX2                                                        | Y |   |   | 71115    | 9.854  | CY | CY | LBK    |

|            |                                                                            |   |   |   |          |        |    |    |        |
|------------|----------------------------------------------------------------------------|---|---|---|----------|--------|----|----|--------|
| A0A1D3K097 | Uncharacterized protein OS=Pseudomonas veronii 1YdBTEX2                    | Y | Y |   | 18757    | 6.3721 | CY | CY | O      |
| A0A1D3K0A2 | 3-oxoadipate CoA-transferase OS=Pseudomonas veronii 1YdBTEX2               | Y | Y |   | 23405    | 4.6172 | CY | CY | IC     |
| A0A1D3K0A7 | Methyl-accepting chemotaxis protein OS=Pseudomonas veronii 1YdBTEX2        | Y |   |   | 76663    | 4.689  | IM | IM | NT(mx) |
| A0A1D3K0C0 | Methyl-accepting chemotaxis protein OS=Pseudomonas veronii 1YdBTEX2        | Y |   |   | 42326    | 4.9116 | OM | IM | NT(mx) |
| A0A1D3K0C8 | UPF0502 protein PVE_R1G3888 OS=Pseudomonas veronii 1YdBTEX2                | Y |   |   | 24947    | 5.3364 | CY | CY | Q      |
| A0A1D3K0D4 | Methyl-accepting chemotaxis protein PA2652 OS=Pseudomonas veronii 1YdBTEX2 |   | Y |   | 59459    | 5.0845 | IM | IM | NT     |
| A0A1D3K0E9 | TonB-dependent siderophore receptor OS=Pseudomonas veronii 1YdBTEX2        | Y | Y | Y | 78183    | 5.3218 | OM | OM | PH     |
| A0A1D3K0F0 | Histidine kinase OS=Pseudomonas veronii 1YdBTEX2                           | Y | Y |   | 16098.62 | 6.29   | CY | CY | KT(mx) |
| A0A1D3K0G0 | Delta-aminolevulinic acid dehydratase OS=Pseudomonas veronii 1YdBTEX2      |   |   | Y | 35410    | 5.4932 | CY | CY | H      |
| A0A1D3K0I8 | Methyl-accepting chemotaxis protein OS=Pseudomonas veronii 1YdBTEX2        | Y | Y | Y | 73299.88 | 5.84   | IM | IM | NT     |
| A0A1D3K0K8 | Methyl-accepting chemotaxis protein PA2652 OS=Pseudomonas veronii 1YdBTEX2 | Y |   |   | 59915    | 5.332  | IM | IM | TQ(mx) |
| A0A1D3K0L5 | Acetyl-CoA acetyltransferase OS=Pseudomonas veronii 1YdBTEX2               | Y | Y | Y | 40278    | 5.7979 | CY | CY | IQC    |
| A0A1D3K0M4 | Tyrosyl-trna synthetase OS=Pseudomonas veronii 1YdBTEX2                    | Y | Y | Y | 20536    | 9.0015 | CY | UK | S      |
| A0A1D3K0N5 | Uncharacterized protein OS=Pseudomonas veronii 1YdBTEX2                    |   | Y |   | 9883     | 9.3149 | IM | UK | M      |
| A0A1D3K0N9 | Antibiotic biosynthesis monooxygenase OS=Pseudomonas veronii 1YdBTEX2      |   |   | Y | 13719    | 5.5518 | CY | UK | S      |
| A0A1D3K0P5 | Glyoxalase OS=Pseudomonas veronii 1YdBTEX2                                 | Y | Y | Y | 16819    | 5.9268 | CY | UK | E      |
| A0A1D3K0P6 | ABC transporter substrate-binding protein OS=Pseudomonas veronii 1YdBTEX2  |   |   | Y | 43826    | 6.5859 | PR | PR | E      |

|            |                                                                                         |   |   |   |          |        |    |            |        |
|------------|-----------------------------------------------------------------------------------------|---|---|---|----------|--------|----|------------|--------|
| A0A1D3K0Q4 | ABC transporter substrate-binding protein<br>OS=Pseudomonas veronii 1YdBTEX2            | Y | Y | Y | 38151    | 5.9868 | PR | PR         | E      |
| A0A1D3K0Q5 | HAD family hydrolase OS=Pseudomonas veronii 1YdBTEX2                                    | Y |   |   | 24554.34 | 4.62   | CY | CY         | EI     |
| A0A1D3K0Q8 | Cro/Ci family transcriptional regulator OS=Pseudomonas veronii 1YdBTEX2                 |   | Y |   | 12021.18 | 4.87   | CY | UK         | K      |
| A0A1D3K0Q9 | Hydroxycinnamoyl-CoA hydratase-lyase OS=Pseudomonas veronii 1YdBTEX2                    |   | Y | Y | 31057.77 | 5.66   | CY | CY         | IH     |
| A0A1D3K0S4 | Response regulatory domain-containing protein<br>OS=Pseudomonas veronii 1YdBTEX2        |   |   | Y | 16751    | 4.7622 | CY | CY         | TK     |
| A0A1D3K0T2 | Acyl-CoA dehydrogenase OS=Pseudomonas veronii 1YdBTEX2                                  |   |   | Y | 41492    | 5.4287 | CY | CY         | I      |
| A0A1D3K0T9 | Uncharacterized protein OS=Pseudomonas veronii 1YdBTEX2                                 | Y | Y | Y | 56103    | 6.2109 | IM | UK         | TN     |
| A0A1D3K0V2 | Recombination-associated protein RdgC OS=Pseudomonas veronii 1YdBTEX2                   | Y | Y | Y | 34161    | 4.6919 | CY | CY         | L      |
| A0A1D3K0W5 | Cysteine protease OS=Pseudomonas veronii 1YdBTEX2                                       | Y |   |   | 24427.95 | 5.81   | CY | UK         | E      |
| A0A1D3K0Y3 | Inorganic pyrophosphatase OS=Pseudomonas veronii 1YdBTEX2                               | Y | Y | Y | 19519    | 4.5981 | CY | CY         | C      |
| A0A1D3K0Y4 | Acetate/butyrate--CoA ligase AAE7_ peroxisomal<br>OS=Pseudomonas veronii 1YdBTEX2       | Y | Y | Y | 59466.24 | 5.7    | CY | CY         | IQ     |
| A0A1D3K0Y9 | Quinone oxidoreductase PIG3 OS=Pseudomonas veronii 1YdBTEX2                             | Y |   | Y | 33520    | 4.623  | UK | ML (C, IM) | CP     |
| A0A1D3K0Z6 | Chemotaxis protein OS=Pseudomonas veronii 1YdBTEX2                                      | Y | Y | Y | 21133    | 4.9307 | CY | IM         | NT(mx) |
| A0A1D3K106 | Alpha/beta hydrolase OS=Pseudomonas veronii 1YdBTEX2                                    | Y |   |   | 30522.96 | 6.67   | CY | CY         | IC     |
| A0A1D3K109 | DeoR family transcriptional regulator OS=Pseudomonas veronii 1YdBTEX2                   | Y | Y | Y | 25657    | 5.6558 | CY | UK         | QE(mx) |
| A0A1D3K115 | Pirin OS=Pseudomonas veronii 1YdBTEX2                                                   |   | Y |   | 31361    | 5.3965 | CY | UK         | LO     |
| A0A1D3K116 | Succinate dehydrogenase iron-sulfur subunit<br>OS=Pseudomonas veronii 1YdBTEX2          | Y |   | Y | 26104    | 7.6685 | CY | IM         | C      |
| A0A1D3K117 | Hypothetical secreted protein OS=Pseudomonas veronii 1YdBTEX2                           | Y | Y | Y | 8351     | 5.6499 | OM | UK         | M      |
| A0A1D3K119 | 3-hydroxydecanoyl-[acyl-carrier-protein] dehydratase<br>OS=Pseudomonas veronii 1YdBTEX2 | Y | Y | Y | 18703    | 6.1362 | CY | CY         | I      |

|            |                                                                                                                                      |   |   |   |          |        |    |    |        |
|------------|--------------------------------------------------------------------------------------------------------------------------------------|---|---|---|----------|--------|----|----|--------|
| A0A1D3K120 | Dihydrolipoyllysine-residue succinyltransferase component of 2-oxoglutarate dehydrogenase complex<br>OS=Pseudomonas veronii 1YdBTEX2 | Y | Y | Y | 42364    | 5.3101 | CY | CY | C      |
| A0A1D3K125 | Dihydrolipoyl dehydrogenase OS=Pseudomonas veronii 1YdBTEX2                                                                          | Y |   | Y | 49961    | 6.2212 | UK | CY | C      |
| A0A1D3K127 | Succinate dehydrogenase hydrophobic membrane anchor subunit OS=Pseudomonas veronii 1YdBTEX2                                          | Y |   |   | 13478.93 | 8.93   | IM | IM | C      |
| A0A1D3K130 | Peptidyl-prolyl cis-trans isomerase OS=Pseudomonas veronii 1YdBTEX2                                                                  | Y | Y | Y | 25585    | 5.1987 | PR | CY | O      |
| A0A1D3K133 | Succinate dehydrogenase flavoprotein subunit<br>OS=Pseudomonas veronii 1YdBTEX2                                                      | Y | Y | Y | 63567    | 5.729  | CY | IM | CHN    |
| A0A1D3K135 | Citrate synthase OS=Pseudomonas veronii 1YdBTEX2                                                                                     | Y | Y | Y | 47769    | 6.4966 | IM | CY | C      |
| A0A1D3K138 | Glycine/betaine ABC transporter substrate-binding protein<br>OS=Pseudomonas veronii 1YdBTEX2                                         | Y |   |   | 28244.73 | 7.1    | UK | UK | EP     |
| A0A1D3K160 | Fumarate hydratase class II OS=Pseudomonas veronii 1YdBTEX2                                                                          | Y | Y | Y | 49123.11 | 5.67   | CY | CY | CEF    |
| A0A1D3K167 | Peptidase M42 OS=Pseudomonas veronii 1YdBTEX2                                                                                        | Y | Y | Y | 42559    | 4.9805 | CY | CY | GE     |
| A0A1D3K174 | Peroxiredoxin OS=Pseudomonas veronii 1YdBTEX2                                                                                        |   |   | Y | 15322    | 5.8081 | CY | CY | OK     |
| A0A1D3K181 | Isochorismatase OS=Pseudomonas veronii 1YdBTEX2                                                                                      | Y | Y | Y | 20683    | 6.4131 | CY | CY | Q      |
| A0A1D3K184 | Succinate--CoA ligase [ADP-forming] subunit beta<br>OS=Pseudomonas veronii 1YdBTEX2                                                  | Y | Y | Y | 42946    | 5.9312 | CY | CY | CF     |
| A0A1D3K197 | Chaperone protein HtpG OS=Pseudomonas veronii 1YdBTEX2                                                                               | Y | Y | Y | 71247    | 4.9834 | CY | CY | OL     |
| A0A1D3K1A4 | Oxoglutarate dehydrogenase (succinyl-transferring)<br>OS=Pseudomonas veronii 1YdBTEX2                                                | Y | Y | Y | 105962   | 6.0835 | CY | CY | CI     |
| A0A1D3K1B1 | Chemotaxis protein OS=Pseudomonas veronii 1YdBTEX2                                                                                   | Y | Y |   | 46935.2  | 4.99   | IM | IM | NT     |
| A0A1D3K1B4 | Probable M18 family aminopeptidase 2 OS=Pseudomonas veronii 1YdBTEX2                                                                 | Y | Y | Y | 46877    | 5.5254 | CY | CY | EG     |
| A0A1D3K1B5 | Cell division inhibitor MinD OS=Pseudomonas veronii 1YdBTEX2                                                                         | Y |   |   | 29228.35 | 5.4    | CY | CY | DU     |
| A0A1D3K1D3 | 3-oxoacyl-[acyl-carrier-protein] synthase 1<br>OS=Pseudomonas veronii 1YdBTEX2                                                       | Y | Y |   | 43010    | 5.3452 | CY | CY | IQ(mx) |
| A0A1D3K1E0 | GTP cyclohydrolase 1 OS=Pseudomonas veronii 1YdBTEX2                                                                                 | Y |   | Y | 20103    | 6.0996 | CY | CY | H      |

|            |                                                                                      |   |   |   |          |        |    |    |        |
|------------|--------------------------------------------------------------------------------------|---|---|---|----------|--------|----|----|--------|
| A0A1D3K1E4 | Succinate--CoA ligase [ADP-forming] subunit alpha<br>OS=Pseudomonas veronii 1YdBTEX2 | Y | Y | Y | 29896    | 6.0762 | CY | CY | C      |
| A0A1D3K1E8 | Exonuclease OS=Pseudomonas veronii 1YdBTEX2                                          |   | Y |   | 20672    | 7.6362 | CY | CY | L      |
| A0A1D3K1F0 | Protein phosphatase CheZ OS=Pseudomonas veronii<br>1YdBTEX2                          | Y | Y | Y | 29494    | 4.708  | CY | CY | NT     |
| A0A1D3K1G9 | ABC transporter substrate-binding protein<br>OS=Pseudomonas veronii 1YdBTEX2         |   |   | Y | 47156    | 5.0186 | PR | PR | E      |
| A0A1D3K1I0 | ATPase AAA OS=Pseudomonas veronii 1YdBTEX2                                           | Y | Y |   | 55503    | 5.5708 | CY | CY | KT(mx) |
| A0A1D3K1I8 | Uncharacterized protein OS=Pseudomonas veronii<br>1YdBTEX2                           |   |   | Y | 29458    | 4.4077 | EX | CY | X      |
| A0A1D3K1J2 | Biotin carboxylase OS=Pseudomonas veronii 1YdBTEX2                                   | Y |   |   | 69142.72 | 6.15   | UK | CY | IF     |
| A0A1D3K1J5 | Aromatic-amino-acid aminotransferase OS=Pseudomonas<br>veronii 1YdBTEX2              | Y | Y |   | 42811    | 5.9956 | CY | CY | EK     |
| A0A1D3K1K2 | Chemotaxis protein CheW OS=Pseudomonas veronii<br>1YdBTEX2                           | Y | Y | Y | 17813    | 4.1499 | CY | CY | NT     |
| A0A1D3K1K6 | Putative pterin-4-alpha-carbinolamine dehydratase<br>OS=Pseudomonas veronii 1YdBTEX2 | Y | Y | Y | 13298    | 5.6353 | CY | CY | H      |
| A0A1D3K1L8 | Metal-binding protein OS=Pseudomonas veronii 1YdBTEX2                                | Y |   |   | 21796    | 3.7983 | CY | CY | L      |
| A0A1D3K1P0 | Dehydrogenase OS=Pseudomonas veronii 1YdBTEX2                                        | Y | Y | Y | 26143    | 9.397  | PR | PR | S      |
| A0A1D3K1Q3 | Cysteine synthase OS=Pseudomonas veronii 1YdBTEX2                                    | Y | Y | Y | 32416    | 5.0361 | CY | CY | E      |
| A0A1D3K1R8 | Flagellin OS=Pseudomonas veronii 1YdBTEX2                                            | Y | Y | Y | 56065.34 | 4.87   | EX | EX | N      |
| A0A1D3K1T5 | Chemotaxis protein OS=Pseudomonas veronii 1YdBTEX2                                   | Y | Y | Y | 56819    | 5.7246 | CY | IM | NT(mx) |
| A0A1D3K1U5 | Membrane protein OS=Pseudomonas veronii 1YdBTEX2                                     |   | Y | Y | 77979    | 5.0684 | EX | OM | PH     |
| A0A1D3K1V3 | Cbb3-type cytochrome c oxidase subunit OS=Pseudomonas<br>veronii 1YdBTEX2            |   | Y | Y | 35294    | 6.0688 | IM | IM | C      |
| A0A1D3K1V5 | Extradiol dioxygenase OS=Pseudomonas veronii 1YdBTEX2                                |   | Y | Y | 13312    | 4.83   | CY | UK | E      |
| A0A1D3K1V7 | Peptidase S41 OS=Pseudomonas veronii 1YdBTEX2                                        |   | Y | Y | 22441    | 8.666  | CY | UK | C      |
| A0A1D3K1V9 | NADPH-dependent curcumin reductase OS=Pseudomonas<br>veronii 1YdBTEX2                | Y |   | Y | 36981    | 5.748  | UK | CY | LC     |
| A0A1D3K1W1 | Peptidase S41 OS=Pseudomonas veronii 1YdBTEX2                                        |   | Y | Y | 22668    | 8.6616 | IM | UK | C      |
| A0A1D3K1Y7 | Outer membrane porin F OS=Pseudomonas veronii<br>1YdBTEX2                            | Y | Y | Y | 34658    | 5.7891 | PR | OM | MNP    |

|            |                                                                                          |   |   |   |          |         |    |    |        |
|------------|------------------------------------------------------------------------------------------|---|---|---|----------|---------|----|----|--------|
| A0A1D3K1Y8 | Cell division protein ZipA OS=Pseudomonas veronii 1YdBTEX2                               | Y | Y |   | 31651    | 5.3467  | IM | CY | X      |
| A0A1D3K202 | CmpX protein OS=Pseudomonas veronii 1YdBTEX2                                             | Y |   |   | 28967    | 6.1582  | IM | IM | MT     |
| A0A1D3K205 | Alanine--tRNA ligase OS=Pseudomonas veronii 1YdBTEX2                                     | Y |   |   | 26846    | 5.6646  | CY | CY | J      |
| A0A1D3K207 | Aconitate hydratase OS=Pseudomonas veronii 1YdBTEX2                                      | Y | Y | Y | 94030.25 | 5.48    | CY | CY | CE     |
| A0A1D3K218 | Phosphoenolpyruvate synthase OS=Pseudomonas veronii 1YdBTEX2                             | Y | Y | Y | 85861    | 4.8164  | CY | CY | GT(mx) |
| A0A1D3K222 | 2-methylisocitrate lyase OS=Pseudomonas veronii 1YdBTEX2                                 | Y | Y | Y | 32137    | 5.5107  | UK | CY | GC     |
| A0A1D3K227 | Cbb3-type cytochrome c oxidase subunit OS=Pseudomonas veronii 1YdBTEX2                   |   | Y |   | 33804    | 5.9707  | IM | IM | C      |
| A0A1D3K228 | Citrate synthase OS=Pseudomonas veronii 1YdBTEX2                                         | Y | Y | Y | 41627    | 5.9531  | CY | CY | C      |
| A0A1D3K241 | Uncharacterized protein OS=Pseudomonas veronii 1YdBTEX2                                  | Y | Y | Y | 12797    | 4.437   | CY | CY | S      |
| A0A1D3K244 | Acyltransferase Rv0859 OS=Pseudomonas veronii 1YdBTEX2                                   | Y | Y | Y | 42039.77 | 5.53    | CY | CY | I      |
| A0A1D3K251 | Amidotransferase OS=Pseudomonas veronii 1YdBTEX2                                         | Y | Y | Y | 27763    | 5.2119  | CY | CY | F      |
| A0A1D3K261 | Electron transfer flavoprotein subunit beta OS=Pseudomonas veronii 1YdBTEX2              | Y | Y | Y | 26298    | 9.4629  | CY | UK | C      |
| A0A1D3K275 | Uncharacterized protein PA1579 OS=Pseudomonas veronii 1YdBTEX2                           | Y | Y | Y | 22109    | 8.4082  | PR | PR | I      |
| A0A1D3K278 | L-arabinose-binding periplasmic protein OS=Pseudomonas veronii 1YdBTEX2                  |   | Y |   | 34896    | 6.0015  | PR | PR | GK     |
| A0A1D3K280 | Electron transfer flavoprotein-ubiquinone oxidoreductase OS=Pseudomonas veronii 1YdBTEX2 | Y | Y | Y | 60641    | 5.4331  | UK | CY | CH     |
| A0A1D3K286 | 50S ribosomal protein L32 OS=Pseudomonas veronii 1YdBTEX2                                |   | Y |   | 6738     | 10.4443 | CY | CY | J      |
| A0A1D3K290 | Sugar kinase OS=Pseudomonas veronii 1YdBTEX2                                             |   |   | Y | 31397    | 4.9512  | PR | CY | GH     |
| A0A1D3K298 | 3-oxoacyl-[acyl-carrier-protein] reductase OS=Pseudomonas veronii 1YdBTEX2               |   |   | Y | 25556    | 5.8477  | CY | CY | IQ     |
| A0A1D3K2A7 | Uncharacterized protein OS=Pseudomonas veronii 1YdBTEX2                                  | Y |   |   | 38950.02 | 5.35    | EX | CY | P      |
| A0A1D3K2A9 | Peptidase S49 OS=Pseudomonas veronii 1YdBTEX2                                            | Y | Y | Y | 35993.71 | 6.93    | OM | IM | OU     |

|            |                                                                                             |   |   |   |          |        |    |              |        |
|------------|---------------------------------------------------------------------------------------------|---|---|---|----------|--------|----|--------------|--------|
| A0A1D3K2B2 | 4-hydroxy-4-methyl-2-oxoglutarate aldolase<br>OS=Pseudomonas veronii 1YdBTEX2               |   | Y | Y | 17408    | 4.4604 | CY | CY           | H      |
| A0A1D3K2B6 | Flagellar brake protein YcgR OS=Pseudomonas veronii<br>1YdBTEX2                             | Y |   |   | 28523.51 | 5.86   | CY | CY           | M      |
| A0A1D3K2B9 | Sensor histidine protein kinase/phosphatase PhoQ<br>OS=Pseudomonas veronii 1YdBTEX2         | Y | Y | Y | 50445.66 | 6      | IM | ML (C, IM)   | TP     |
| A0A1D3K2C5 | Virulence transcriptional regulatory protein PhoP<br>OS=Pseudomonas veronii 1YdBTEX2        | Y |   |   | 25547    | 5.2983 | CY | CY           | KT(mx) |
| A0A1D3K2C8 | Flagellar basal-body rod protein FlgC OS=Pseudomonas<br>veronii 1YdBTEX2                    | Y |   |   | 15770    | 4.6318 | EX | PR-flagellar | N      |
| A0A1D3K2E2 | Cyclic-di-GMP-binding biofilm dispersal mediator protein<br>OS=Pseudomonas veronii 1YdBTEX2 |   | Y |   | 25193.02 | 5.43   | UK | CY           | IQ     |
| A0A1D3K2F0 | Acyl carrier protein OS=Pseudomonas veronii 1YdBTEX2                                        | Y | Y | Y | 8637     | 3.7515 | CY | CY           | IQ(mx) |
| A0A1D3K2F3 | Electron transfer flavoprotein subunit alpha<br>OS=Pseudomonas veronii 1YdBTEX2             | Y | Y |   | 31293    | 4.8838 | CY | UK           | C      |
| A0A1D3K2F5 | Low specificity L-threonine aldolase OS=Pseudomonas<br>veronii 1YdBTEX2                     | Y |   |   | 36113    | 6.1582 | CY | CY           | E      |
| A0A1D3K2G0 | Ribonuclease E OS=Pseudomonas veronii 1YdBTEX2                                              | Y | Y |   | 117039   | 4.7842 | CY | CY           | JG     |
| A0A1D3K2G3 | Arginine N-succinyltransferase subunit beta<br>OS=Pseudomonas veronii 1YdBTEX2              | Y |   | Y | 37416    | 6.271  | CY | CY           | E      |
| A0A1D3K2G8 | N-succinylglutamate 5-semialdehyde dehydrogenase<br>OS=Pseudomonas veronii 1YdBTEX2         | Y |   |   | 51407    | 4.9863 | UK | CY           | CE     |
| A0A1D3K2H4 | TetR family transcriptional regulator OS=Pseudomonas<br>veronii 1YdBTEX2                    |   |   | Y | 25780    | 6.2827 | CY | CY           | K      |
| A0A1D3K2H8 | N-succinylarginine dihydrolase OS=Pseudomonas veronii<br>1YdBTEX2                           | Y | Y | Y | 48526    | 6.0571 | CY | CY           | E      |
| A0A1D3K2I0 | Acetyl-coenzyme A synthetase OS=Pseudomonas veronii<br>1YdBTEX2                             | Y | Y | Y | 71555    | 5.9897 | CY | CY           | IQ(mx) |
| A0A1D3K2I2 | AraC family transcriptional regulator OS=Pseudomonas<br>veronii 1YdBTEX2                    | Y | Y |   | 18114    | 5.5049 | CY | CY           | KT     |
| A0A1D3K2I7 | Lysine/arginine/ornithine-binding periplasmic protein<br>OS=Pseudomonas veronii 1YdBTEX2    | Y | Y | Y | 28347    | 7.0386 | PR | PR           | ET     |

|            |                                                                                         |   |   |   |          |        |    |    |        |
|------------|-----------------------------------------------------------------------------------------|---|---|---|----------|--------|----|----|--------|
| A0A1D3K2J8 | Aldehyde dehydrogenase OS=Pseudomonas veronii 1YdBTEX2                                  |   | Y |   | 16918    | 6.0747 | CY | CY | P      |
| A0A1D3K2J9 | Glycerophosphoryl diester phosphodiesterase OS=Pseudomonas veronii 1YdBTEX2             | Y | Y | Y | 38529.79 | 5.45   | PR | PR | C      |
| A0A1D3K2K2 | 3-oxoacyl-[acyl-carrier-protein] synthase 2 OS=Pseudomonas veronii 1YdBTEX2             | Y |   |   | 43263    | 5.5342 | CY | IM | IQ(mx) |
| A0A1D3K2K3 | Ribonucleoside-diphosphate reductase OS=Pseudomonas veronii 1YdBTEX2                    | Y | Y | Y | 107325   | 5.5327 | EX | CY | F      |
| A0A1D3K2K5 | Alanine--tRNA ligase OS=Pseudomonas veronii 1YdBTEX2                                    | Y |   | Y | 93722    | 5.3423 | CY | CY | J      |
| A0A1D3K2K7 | Methyl-accepting chemotaxis protein CtpH OS=Pseudomonas veronii 1YdBTEX2                | Y |   | Y | 58333    | 5.5254 | IM | IM | NT(mx) |
| A0A1D3K2L3 | Uncharacterized HTH-type transcriptional regulator YhjC OS=Pseudomonas veronii 1YdBTEX2 | Y |   |   | 32955.27 | 6.25   | CY | CY | K      |
| A0A1D3K2L4 | Probable sugar-binding periplasmic protein OS=Pseudomonas veronii 1YdBTEX2              | Y | Y | Y | 45582    | 6.1567 | PR | PR | GP     |
| A0A1D3K2N2 | Long-chain-fatty-acid--CoA ligase OS=Pseudomonas veronii 1YdBTEX2                       | Y | Y | Y | 61501.17 | 8.32   | CY | CY | IQ     |
| A0A1D3K2P8 | Acetyl-CoA carboxylase OS=Pseudomonas veronii 1YdBTEX2                                  | Y |   |   | 13858    | 5.6045 | CY | CY | S      |
| A0A1D3K2Q8 | AraC family transcriptional regulator OS=Pseudomonas veronii 1YdBTEX2                   |   |   | Y | 39385    | 6.0015 | CY | CY | K      |
| A0A1D3K2S6 | Carbamate kinase OS=Pseudomonas veronii 1YdBTEX2                                        | Y |   |   | 32790    | 5.1021 | UK | CY | E      |
| A0A1D3K2S7 | Acetylornithine aminotransferase OS=Pseudomonas veronii 1YdBTEX2                        | Y | Y | Y | 43245    | 5.7817 | CY | CY | EH(mx) |
| A0A1D3K2S8 | CAIB/BAIF family CoA transferase OS=Pseudomonas veronii 1YdBTEX2                        | Y | Y | Y | 48084    | 6.9346 | PR | CY | C      |
| A0A1D3K2T8 | CSD domain-containing protein OS=Pseudomonas veronii 1YdBTEX2                           | Y | Y | Y | 7788     | 7.708  | CY | CY | KL     |
| A0A1D3K2T9 | L-serine dehydratase OS=Pseudomonas veronii 1YdBTEX2                                    | Y | Y | Y | 48721.8  | 6.43   | CY | CY | E      |
| A0A1D3K2U2 | Porin OS=Pseudomonas veronii 1YdBTEX2                                                   | Y | Y | Y | 49479    | 5.9956 | OM | OM | M      |
| A0A1D3K2U3 | Glycine cleavage system T protein OS=Pseudomonas veronii 1YdBTEX2                       | Y | Y | Y | 40310    | 5.7056 | CY | CY | E      |

|            |                                                                                    |   |   |   |          |        |    |    |        |
|------------|------------------------------------------------------------------------------------|---|---|---|----------|--------|----|----|--------|
| A0A1D3K2U4 | Methyl-accepting chemotaxis protein PctA<br>OS=Pseudomonas veronii 1YdBTEX2        | Y | Y | Y | 67708    | 4.9702 | IM | IM | NT(mx) |
| A0A1D3K2U5 | Glycine dehydrogenase (decarboxylating)<br>OS=Pseudomonas veronii 1YdBTEX2         | Y | Y | Y | 102259   | 5.6499 | UK | CY | E      |
| A0A1D3K2U9 | Superoxide dismutase OS=Pseudomonas veronii 1YdBTEX2                               | Y |   | Y | 21905    | 5.4961 | CY | PR | CP     |
| A0A1D3K2V0 | Peptidoglycan-associated protein OS=Pseudomonas veronii<br>1YdBTEX2                | Y | Y |   | 17768    | 5.6748 | OM | OM | MN     |
| A0A1D3K2V5 | Tol-Pal system protein TolB OS=Pseudomonas veronii<br>1YdBTEX2                     |   | Y | Y | 45789    | 9.3501 | CY | PR | U      |
| A0A1D3K2V8 | Arylsulfate sulfotransferase OS=Pseudomonas veronii<br>1YdBTEX2                    | Y |   |   | 12578.54 | 9.59   | CY | CY | OT     |
| A0A1D3K2W1 | Pyruvate kinase OS=Pseudomonas veronii 1YdBTEX2                                    | Y |   |   | 52052    | 5.9707 | CY | CY | G      |
| A0A1D3K2W4 | Protein translocase subunit SecA OS=Pseudomonas veronii<br>1YdBTEX2                | Y | Y | Y | 102871   | 5.2559 | CY | CY | UE(mx) |
| A0A1D3K2W7 | Aspartate--tRNA(Asp/Asn) ligase OS=Pseudomonas veronii<br>1YdBTEX2                 | Y | Y | Y | 66257    | 5.272  | CY | CY | J      |
| A0A1D3K2X0 | UPF0234 protein PVE_R1G4785 OS=Pseudomonas veronii<br>1YdBTEX2                     | Y | Y | Y | 18236    | 7.3169 | CY | CY | S      |
| A0A1D3K2X4 | Exodeoxyribonuclease I OS=Pseudomonas veronii<br>1YdBTEX2                          | Y |   |   | 54703.87 | 5.66   | CY | CY | L      |
| A0A1D3K2Y0 | Methyl-accepting chemotaxis protein OS=Pseudomonas<br>veronii 1YdBTEX2             | Y | Y | Y | 76074    | 4.8486 | IM | IM | NT(mx) |
| A0A1D3K2Y2 | Peptidase OS=Pseudomonas veronii 1YdBTEX2                                          | Y | Y |   | 47150    | 4.3711 | UK | OM | P      |
| A0A1D3K2Y3 | Ornithine carbamoyltransferase OS=Pseudomonas veronii<br>1YdBTEX2                  | Y | Y | Y | 37867    | 6.0117 | CY | CY | EF     |
| A0A1D3K2Z9 | Proline--tRNA ligase OS=Pseudomonas veronii 1YdBTEX2                               | Y | Y | Y | 63107    | 5.1343 | CY | CY | J      |
| A0A1D3K314 | Glyceraldehyde-3-phosphate dehydrogenase<br>OS=Pseudomonas veronii 1YdBTEX2        | Y | Y | Y | 36056    | 6.23   | CY | CY | GE     |
| A0A1D3K322 | Arginine biosynthesis bifunctional protein ArgJ<br>OS=Pseudomonas veronii 1YdBTEX2 | Y |   |   | 42253    | 5.0054 | CY | CY | E      |
| A0A1D3K323 | Imelysin family lipoprotein OS=Pseudomonas veronii<br>1YdBTEX2                     |   | Y |   | 38456    | 6.5244 | PR | UK | S      |
| A0A1D3K332 | Arginine deiminase OS=Pseudomonas veronii 1YdBTEX2                                 | Y | Y | Y | 46343    | 5.2427 | CY | CY | E      |

|            |                                                                                    |   |   |   |          |         |    |    |        |
|------------|------------------------------------------------------------------------------------|---|---|---|----------|---------|----|----|--------|
| A0A1D3K334 | 10 kDa chaperonin OS=Pseudomonas veronii 1YdBTEX2                                  | Y | Y | Y | 10254    | 6.1318  | CY | CY | O      |
| A0A1D3K335 | 60 kDa chaperonin OS=Pseudomonas veronii 1YdBTEX2                                  | Y | Y | Y | 57069    | 4.7754  | CY | CY | O      |
| A0A1D3K342 | Porin D OS=Pseudomonas veronii 1YdBTEX2                                            | Y | Y | Y | 46960    | 5.6396  | OM | OM | S      |
| A0A1D3K345 | Secretion protein HyID OS=Pseudomonas veronii 1YdBTEX2                             | Y |   | Y | 38015    | 8.9209  | IM | IM | MV     |
| A0A1D3K353 | Threonine synthase OS=Pseudomonas veronii 1YdBTEX2                                 | Y | Y | Y | 51952    | 5.7393  | CY | CY | EP     |
| A0A1D3K358 | GTP-binding protein OS=Pseudomonas veronii 1YdBTEX2                                | Y |   |   | 22702.77 | 4.82    | IM | UK | CO(mx) |
| A0A1D3K362 | Uncharacterized protein slr1894 OS=Pseudomonas veronii 1YdBTEX2                    | Y | Y | Y | 17764    | 5.2354  | CY | CY | P      |
| A0A1D3K366 | Phosphoenolpyruvate--protein phosphotransferase OS=Pseudomonas veronii 1YdBTEX2    | Y |   |   | 88802    | 5.5474  | CY | CY | GT     |
| A0A1D3K367 | Phosphoribosylformylglycinamide synthase OS=Pseudomonas veronii 1YdBTEX2           | Y | Y | Y | 140552   | 4.8809  | CY | CY | FT     |
| A0A1D3K371 | Iron-sulfur cluster assembly scaffold protein IscU OS=Pseudomonas veronii 1YdBTEX2 | Y |   | Y | 13861    | 5.0186  | CY | CY | CP     |
| A0A1D3K372 | Nudix hydrolase domain-containing protein OS=Pseudomonas veronii 1YdBTEX2          | Y |   |   | 34075    | 5.3262  | CY | CY | FH(mx) |
| A0A1D3K378 | Protein translocase subunit SecD OS=Pseudomonas veronii 1YdBTEX2                   | Y | Y |   | 67207    | 9.7251  | IM | IM | UQ(mx) |
| A0A1D3K382 | H-NS histone OS=Pseudomonas veronii 1YdBTEX2                                       | Y | Y | Y | 13999    | 9.9697  | CY | CY | S      |
| A0A1D3K388 | Outer membrane protein assembly factor BamB OS=Pseudomonas veronii 1YdBTEX2        | Y | Y |   | 42902    | 5.5225  | UK | OM | G      |
| A0A1D3K395 | 2-isopropylmalate synthase OS=Pseudomonas veronii 1YdBTEX2                         |   | Y |   | 61773    | 5.2236  | CY | CY | E      |
| A0A1D3K397 | Nucleoside diphosphate kinase OS=Pseudomonas veronii 1YdBTEX2                      | Y |   |   | 14943    | 5.2588  | CY | EX | F      |
| A0A1D3K398 | Chaperone protein HscA homolog OS=Pseudomonas veronii 1YdBTEX2                     | Y | Y | Y | 66169.28 | 4.78    | CY | CY | OD     |
| A0A1D3K399 | 50S ribosomal protein L19 OS=Pseudomonas veronii 1YdBTEX2                          | Y |   |   | 12961    | 10.7021 | CY | CY | J      |
| A0A1D3K3A4 | TonB-dependent receptor OS=Pseudomonas veronii 1YdBTEX2                            | Y | Y | Y | 92999    | 6.4937  | EX | OM | PH     |
| A0A1D3K3A7 | Uncharacterized protein OS=Pseudomonas veronii 1YdBTEX2                            | Y |   |   | 7672     | 5.6089  | CY | UK | S      |

|            |                                                                                  |   |   |   |          |         |    |    |        |
|------------|----------------------------------------------------------------------------------|---|---|---|----------|---------|----|----|--------|
| A0A1D3K3B1 | Cysteine desulfurase IscS OS=Pseudomonas veronii 1YdBTEX2                        | Y | Y | Y | 44443    | 5.9165  | CY | CY | E      |
| A0A1D3K3B3 | Dual-specificity RNA methyltransferase RlmN OS=Pseudomonas veronii 1YdBTEX2      | Y |   |   | 42244.54 | 8.6     | CY | CY | JC     |
| A0A1D3K3C7 | Inosine-5'-monophosphate dehydrogenase OS=Pseudomonas veronii 1YdBTEX2           | Y | Y | Y | 51939    | 6.2534  | CY | CY | FT(mx) |
| A0A1D3K3D5 | 30S ribosomal protein S16 OS=Pseudomonas veronii 1YdBTEX2                        | Y | Y | Y | 9201     | 10.8369 | CY | CY | J      |
| A0A1D3K3F7 | Rick_17kDa_Anti domain-containing protein OS=Pseudomonas veronii 1YdBTEX2        |   | Y |   | 18682    | 9.5347  | PR | UK | IM     |
| A0A1D3K3F8 | 12-oxophytodienoate reductase OS=Pseudomonas veronii 1YdBTEX2                    | Y |   |   | 40370    | 6.0044  | CY | CY | C      |
| A0A1D3K3G0 | Aminotransferase OS=Pseudomonas veronii 1YdBTEX2                                 | Y |   |   | 38920.08 | 8.61    | PR | IM | EK     |
| A0A1D3K3G5 | Uncharacterized protein PA3922 OS=Pseudomonas veronii 1YdBTEX2                   | Y |   |   | 48317.62 | 7.94    | PR | UK | S      |
| A0A1D3K3G8 | Peptidyl-prolyl cis-trans isomerase OS=Pseudomonas veronii 1YdBTEX2              | Y |   |   | 21732    | 4.4194  | CY | CY | O      |
| A0A1D3K3H2 | GMP synthase [glutamine-hydrolyzing] OS=Pseudomonas veronii 1YdBTEX2             | Y | Y | Y | 58261    | 5.4507  | CY | CY | FH(mx) |
| A0A1D3K3I7 | Iron-binding protein IscA OS=Pseudomonas veronii 1YdBTEX2                        | Y |   | Y | 11648    | 4.6743  | CY | CY | C      |
| A0A1D3K3J3 | Uncharacterized protein OS=Pseudomonas veronii 1YdBTEX2                          |   | Y |   | 7492     | 3.835   | CY | UK | S      |
| A0A1D3K3K1 | 3-hydroxyisobutyrate dehydrogenase OS=Pseudomonas veronii 1YdBTEX2               | Y | Y | Y | 29998    | 5.5122  | CY | CY | IG     |
| A0A1D3K3K8 | Glutathione peroxidase OS=Pseudomonas veronii                                    | Y | Y | Y | 17519    | 5.2383  | CY | PR | CO     |
| A0A1D3K3K9 | Protein CreA OS=Pseudomonas veronii 1YdBTEX2                                     |   | Y |   | 16860    | 9.2183  | CY | UK | S      |
| A0A1D3K3L5 | Methyl-accepting chemotaxis protein McpS OS=Pseudomonas veronii 1YdBTEX2         | Y |   |   | 68336.28 | 5.23    | IM | IM | NT     |
| A0A1D3K3L8 | Muconolactone Delta-isomerase OS=Pseudomonas veronii 1YdBTEX2                    |   | Y | Y | 11133    | 6.3193  | CY | UK | Q      |
| A0A1D3K3M6 | RNA polymerase-binding transcription factor DksA OS=Pseudomonas veronii 1YdBTEX2 | Y | Y |   | 17100    | 4.9497  | CY | CY | T      |

|            |                                                                                                         |   |   |   |          |         |    |    |        |
|------------|---------------------------------------------------------------------------------------------------------|---|---|---|----------|---------|----|----|--------|
| A0A1D3K3M8 | PAS sensor protein OS=Pseudomonas veronii 1YdBTEX2                                                      |   | Y |   | 17296.85 | 6.12    | CY | UK | TK     |
| A0A1D3K3P0 | Anthranilate 1_2-dioxygenase small subunit<br>OS=Pseudomonas veronii 1YdBTEX2                           | Y |   | Y | 19536    | 6.8965  | CY | CY | Q      |
| A0A1D3K3P2 | Hypothetical membrane protein OS=Pseudomonas veronii<br>1YdBTEX2                                        | Y |   |   | 12683    | 8.5503  | CY | IM | H      |
| A0A1D3K3P7 | 50S ribosomal protein L21 OS=Pseudomonas veronii<br>1YdBTEX2                                            | Y | Y | Y | 11596    | 10.2993 | CY | CY | J      |
| A0A1D3K3P9 | Transcription termination/antitermination protein NusA<br>OS=Pseudomonas veronii 1YdBTEX2               | Y | Y | Y | 54381    | 4.3506  | CY | CY | KJ     |
| A0A1D3K3Q9 | Carbamoyl-phosphate synthase large chain<br>OS=Pseudomonas veronii 1YdBTEX2                             | Y |   | Y | 117424   | 4.9233  | UK | UK | F      |
| A0A1D3K3R3 | APH domain-containing protein OS=Pseudomonas veronii<br>1YdBTEX2                                        | Y |   |   | 57785.94 | 5.79    | CY | CY | M      |
| A0A1D3K3R6 | Catechol 1_2-dioxygenase OS=Pseudomonas veronii<br>1YdBTEX2                                             | Y |   | Y | 34546    | 4.8457  | CY | CY | Q      |
| A0A1D3K3S6 | Ornithine aminotransferase OS=Pseudomonas veronii<br>1YdBTEX2                                           |   | Y | Y | 20369    | 9.936   | OM | PR | S      |
| A0A1D3K3T4 | Thioredoxin reductase OS=Pseudomonas veronii 1YdBTEX2                                                   | Y |   | Y | 33696    | 4.9512  | PR | UK | C      |
| A0A1D3K3T6 | Cell envelope biogenesis protein OmpA OS=Pseudomonas<br>veronii 1YdBTEX2                                |   | Y |   | 17302    | 9.4072  | PR | OM | MN     |
| A0A1D3K3U5 | 50S ribosomal protein L27 OS=Pseudomonas veronii<br>1YdBTEX2                                            |   | Y |   | 9767     | 10.8545 | CY | CY | J      |
| A0A1D3K3U7 | Chaperone protein DnaK OS=Pseudomonas veronii<br>1YdBTEX2                                               | Y | Y | Y | 68413    | 4.7124  | CY | CY | ODE    |
| A0A1D3K3U9 | Ferric uptake regulation protein OS=Pseudomonas veronii<br>1YdBTEX2                                     | Y | Y | Y | 15117    | 5.1606  | CY | CY | P      |
| A0A1D3K3V1 | Carbamoyl-phosphate synthase small chain<br>OS=Pseudomonas veronii 1YdBTEX2                             | Y | Y | Y | 40686    | 5.3481  | CY | CY | FH(mx) |
| A0A1D3K3V4 | Phosphoglucosamine mutase OS=Pseudomonas veronii<br>1YdBTEX2                                            | Y | Y | Y | 47719    | 5.5254  | CY | CY | G      |
| A0A1D3K3W3 | Methylmalonate-semialdehyde dehydrogenase [acylating]_<br>mitochondrial OS=Pseudomonas veronii 1YdBTEX2 | Y | Y | Y | 53790    | 5.8125  | CY | CY | CEK    |

|            |                                                                                      |   |   |   |          |        |    |    |        |
|------------|--------------------------------------------------------------------------------------|---|---|---|----------|--------|----|----|--------|
| A0A1D3K3W6 | Chaperone protein DnaJ OS=Pseudomonas veronii 1YdBTEX2                               | Y |   | Y | 40362    | 6.2065 | OM | CY | O      |
| A0A1D3K3X1 | Acetone carboxylase gamma subunit OS=Pseudomonas veronii 1YdBTEX2                    |   | Y | Y | 19482    | 5.3862 | CY | CY | EQ     |
| A0A1D3K3Z2 | Transposase OS=Pseudomonas veronii 1YdBTEX2                                          |   |   | Y | 24110    | 8.9883 | UK | UK | KL     |
| A0A1D3K3Z6 | Ketol-acid reductoisomerase (NADP(+)) OS=Pseudomonas veronii 1YdBTEX2                | Y | Y | Y | 36202    | 5.3525 | CY | CY | IEH    |
| A0A1D3K402 | Acetone carboxylase alpha subunit OS=Pseudomonas veronii 1YdBTEX2                    | Y | Y | Y | 86396    | 5.4595 | CY | CY | EQ     |
| A0A1D3K403 | Glucose-6-phosphate isomerase OS=Pseudomonas veronii 1YdBTEX2                        | Y |   | Y | 61455.19 | 6.4    | IM | CY | G      |
| A0A1D3K406 | Serine hydroxymethyltransferase OS=Pseudomonas veronii 1YdBTEX2                      | Y |   |   | 44825    | 5.9399 | CY | CY | EH     |
| A0A1D3K408 | Energy-dependent translational throttle protein EttA OS=Pseudomonas veronii 1YdBTEX2 | Y |   | Y | 61421    | 5.187  | CY | CY | VQ(mx) |
| A0A1D3K427 | Catalase OS=Pseudomonas veronii 1YdBTEX2                                             | Y | Y | Y | 53782.22 | 6.97   | CY | CY | C      |
| A0A1D3K431 | Chemotaxis protein OS=Pseudomonas veronii 1YdBTEX2                                   | Y |   | Y | 76464    | 4.7607 | IM | IM | NT(mx) |
| A0A1D3K434 | Translation initiation factor IF-2 OS=Pseudomonas veronii 1YdBTEX2                   | Y | Y | Y | 90498    | 6.5156 | CY | CY | JM(mx) |
| A0A1D3K439 | Inner membrane protein YjiY OS=Pseudomonas veronii 1YdBTEX2                          | Y |   |   | 73786.48 | 9.1    | IM | IM | T      |
| A0A1D3K442 | Uncharacterized protein OS=Pseudomonas veronii 1YdBTEX2                              | Y | Y | Y | 54124.43 | 6.81   | CY | UK | S      |
| A0A1D3K443 | Polyribonucleotide nucleotidyltransferase OS=Pseudomonas veronii 1YdBTEX2            | Y | Y | Y | 74887    | 5.0259 | UK | CY | J      |
| A0A1D3K444 | Transcription elongation factor GreA OS=Pseudomonas veronii 1YdBTEX2                 | Y |   |   | 17371    | 5.1182 | CY | CY | KJ     |
| A0A1D3K451 | Acetone carboxylase beta subunit OS=Pseudomonas veronii 1YdBTEX2                     |   | Y | Y | 77668    | 5.0962 | CY | CY | EQ     |
| A0A1D3K459 | TetR family transcriptional regulator OS=Pseudomonas veronii 1YdBTEX2                |   |   | Y | 25686    | 6.4365 | CY | CY | K      |
| A0A1D3K465 | Protein GrpE OS=Pseudomonas veronii 1YdBTEX2                                         | Y |   | Y | 20671    | 4.4458 | CY | CY | O      |

|            |                                                                                |   |   |   |          |         |    |            |        |
|------------|--------------------------------------------------------------------------------|---|---|---|----------|---------|----|------------|--------|
| A0A1D3K476 | Shikimate dehydrogenase (NADP(+)) OS=Pseudomonas veronii 1YdBTEX2              | Y |   | Y | 30332    | 5.5869  | CY | CY         | EH     |
| A0A1D3K477 | Glutamate-1-semialdehyde 2_1-aminomutase OS=Pseudomonas veronii 1YdBTEX2       | Y |   |   | 45122    | 5.3306  | CY | CY         | HE(mx) |
| A0A1D3K478 | LPS-assembly lipoprotein LptE OS=Pseudomonas veronii 1YdBTEX2                  | Y | Y | Y | 22362    | 5.6133  | OM | CY         | M      |
| A0A1D3K486 | Membrane-bound lytic murein transglycosylase B OS=Pseudomonas veronii 1YdBTEX2 |   | Y |   | 37873    | 5.5034  | CY | IM         | M      |
| A0A1D3K488 | Leucine--tRNA ligase OS=Pseudomonas veronii 1YdBTEX2                           | Y | Y | Y | 97123    | 5.3438  | CY | CY         | J      |
| A0A1D3K496 | ABC transporter substrate-binding protein OS=Pseudomonas veronii 1YdBTEX2      |   |   | Y | 27082    | 4.1982  | PR | PR         | E      |
| A0A1D3K4A0 | Magnesium and cobalt efflux protein CorC OS=Pseudomonas veronii 1YdBTEX2       | Y | Y | Y | 31413.24 | 4.93    | CY | ML (C, IM) | PT     |
| A0A1D3K4A8 | AMP nucleosidase OS=Pseudomonas veronii 1YdBTEX2                               | Y | Y | Y | 54477    | 6.3633  | CY | CY         | F      |
| A0A1D3K4B7 | Endoribonuclease YbeY OS=Pseudomonas veronii                                   |   |   | Y | 17235    | 4.0254  | CY | CY         | JC     |
| A0A1D3K4C4 | Uncharacterized protein OS=Pseudomonas veronii 1YdBTEX2                        | Y |   |   | 56148.75 | 5.7     | CY | UK         | S      |
| A0A1D3K4D2 | Uncharacterized protein YraR OS=Pseudomonas veronii 1YdBTEX2                   | Y |   |   | 23402    | 8.0112  | CY | CY         | GM     |
| A0A1D3K4D7 | Endopeptidase La OS=Pseudomonas veronii 1YdBTEX2                               | Y |   |   | 89084.55 | 4.85    | CY | CY         | OP     |
| A0A1D3K4G0 | MaoC family dehydratase OS=Pseudomonas veronii 1YdBTEX2                        | Y | Y | Y | 16781.79 | 5.9     | UK | CY         | CI     |
| A0A1D3K4G6 | Outer membrane protein W OS=Pseudomonas veronii 1YdBTEX2                       | Y | Y | Y | 24771    | 8.7847  | OM | OM         | M      |
| A0A1D3K4H2 | Transcription antitermination protein NusB OS=Pseudomonas veronii 1YdBTEX2     | Y |   |   | 18865.78 | 5.56    | CY | CY         | J      |
| A0A1D3K4H5 | 6_7-dimethyl-8-ribityllumazine synthase OS=Pseudomonas veronii 1YdBTEX2        | Y | Y | Y | 16437    | 5.6177  | CY | CY         | H      |
| A0A1D3K4H8 | Uncharacterized protein OS=Pseudomonas veronii 1YdBTEX2                        | Y |   |   | 35413.98 | 9.37    | CY | UK         | S      |
| A0A1D3K4I6 | 30S ribosomal protein S4 OS=Pseudomonas veronii 1YdBTEX2                       | Y | Y |   | 23062    | 10.1177 | CY | CY         | J      |

|            |                                                                          |   |   |   |          |         |    |    |     |
|------------|--------------------------------------------------------------------------|---|---|---|----------|---------|----|----|-----|
| A0A1D3K4I7 | 50S ribosomal protein L17 OS=Pseudomonas veronii 1YdBTEX2                | Y | Y | Y | 14406    | 11.0186 | CY | CY | J   |
| A0A1D3K4J2 | Catalase OS=Pseudomonas veronii 1YdBTEX2                                 | Y | Y | Y | 53667    | 6.8833  | PR | PR | CP  |
| A0A1D3K4J6 | 50S ribosomal protein L6 OS=Pseudomonas veronii 1YdBTEX2                 | Y | Y | Y | 19185    | 10.0459 | CY | CY | J   |
| A0A1D3K4K1 | Inorganic pyrophosphatase OS=Pseudomonas veronii 1YdBTEX2                | Y | Y | Y | 19365    | 4.5981  | CY | CY | C   |
| A0A1D3K4K4 | 50S ribosomal protein L18 OS=Pseudomonas veronii 1YdBTEX2                | Y | Y | Y | 12634    | 10.7095 | CY | CY | J   |
| A0A1D3K4K6 | Thioredoxin OS=Pseudomonas veronii 1YdBTEX2                              | Y |   |   | 31627    | 4.4897  | OM | CY | O   |
| A0A1D3K4K8 | 50S ribosomal protein L22 OS=Pseudomonas veronii 1YdBTEX2                | Y | Y |   | 11903    | 10.6216 | CY | CY | J   |
| A0A1D3K4L0 | Hydrogenase OS=Pseudomonas veronii 1YdBTEX2                              | Y |   |   | 28113.39 | 5.82    | OM | UK | HK  |
| A0A1D3K4L2 | 50S ribosomal protein L2 OS=Pseudomonas veronii 1YdBTEX2                 | Y | Y | Y | 29673    | 11.6367 | CY | CY | J   |
| A0A1D3K4L5 | 30S ribosomal protein S3 OS=Pseudomonas veronii 1YdBTEX2                 | Y | Y | Y | 25736    | 10.4531 | CY | CY | J   |
| A0A1D3K4M1 | DNA-directed RNA polymerase subunit beta OS=Pseudomonas veronii 1YdBTEX2 | Y | Y | Y | 150894   | 5.5151  | OM | CY | K   |
| A0A1D3K4M2 | Single-stranded DNA-binding protein OS=Pseudomonas veronii 1YdBTEX2      | Y | Y | Y | 18977    | 5.8184  | CY | CY | L   |
| A0A1D3K4M3 | 30S ribosomal protein S12 OS=Pseudomonas veronii 1YdBTEX2                |   | Y |   | 13716.41 | 11.1    | CY | CY | J   |
| A0A1D3K4M5 | 30S ribosomal protein S7 OS=Pseudomonas veronii 1YdBTEX2                 |   | Y | Y | 17636    | 10.5762 | CY | CY | J   |
| A0A1D3K4M9 | 50S ribosomal protein L15 OS=Pseudomonas veronii 1YdBTEX2                | Y | Y | Y | 15215    | 11.2471 | CY | CY | J   |
| A0A1D3K4N2 | 30S ribosomal protein S13 OS=Pseudomonas veronii 1YdBTEX2                | Y | Y | Y | 13272    | 11.3862 | CY | CY | J   |
| A0A1D3K4N4 | 50S ribosomal protein L14 OS=Pseudomonas veronii 1YdBTEX2                | Y | Y | Y | 13401    | 11.376  | CY | CY | J   |
| A0A1D3K4N7 | Aldehyde dehydrogenase OS=Pseudomonas veronii 1YdBTEX2                   | Y | Y | Y | 54882    | 5.8169  | CY | CY | CEK |

|            |                                                                          |   |   |   |       |         |    |    |    |
|------------|--------------------------------------------------------------------------|---|---|---|-------|---------|----|----|----|
| A0A1D3K4N8 | 30S ribosomal protein S17 OS=Pseudomonas veronii 1YdBTEX2                | Y | Y | Y | 10090 | 10.1455 | CY | CY | J  |
| A0A1D3K4N9 | Putative 3-methyladenine DNA glycosylase OS=Pseudomonas veronii 1YdBTEX2 | Y | Y | Y | 25409 | 9.2065  | CY | UK | L  |
| A0A1D3K4P2 | 50S ribosomal protein L24 OS=Pseudomonas veronii 1YdBTEX2                | Y | Y | Y | 11338 | 10.5615 | CY | CY | J  |
| A0A1D3K4P3 | 50S ribosomal protein L3 OS=Pseudomonas veronii 1YdBTEX2                 | Y | Y | Y | 22563 | 10.3638 | CY | CY | J  |
| A0A1D3K4P6 | Ribulose-phosphate 3-epimerase OS=Pseudomonas veronii 1YdBTEX2           | Y | Y | Y | 24076 | 4.7725  | CY | CY | GH |
| A0A1D3K4P8 | 30S ribosomal protein S11 OS=Pseudomonas veronii 1YdBTEX2                | Y | Y |   | 13607 | 11.2646 | CY | CY | J  |
| A0A1D3K4Q0 | 30S ribosomal protein S10 OS=Pseudomonas veronii 1YdBTEX2                | Y | Y | Y | 11745 | 10.248  | CY | CY | J  |
| A0A1D3K4Q1 | 50S ribosomal protein L4 OS=Pseudomonas veronii 1YdBTEX2                 | Y | Y | Y | 21954 | 10.2363 | CY | CY | J  |
| A0A1D3K4Q3 | 50S ribosomal protein L1 OS=Pseudomonas veronii 1YdBTEX2                 | Y | Y | Y | 24060 | 10.043  | CY | CY | J  |
| A0A1D3K4Q4 | Anthranilate synthase component 1 OS=Pseudomonas veronii 1YdBTEX2        | Y |   | Y | 54351 | 4.8413  | UK | CY | EH |
| A0A1D3K4Q5 | Anthranilate synthase component 2 OS=Pseudomonas veronii 1YdBTEX2        |   | Y |   | 21643 | 5.064   | CY | CY | EH |
| A0A1D3K4Q7 | 50S ribosomal protein L5 OS=Pseudomonas veronii 1YdBTEX2                 | Y | Y | Y | 20444 | 10.1499 | CY | CY | J  |
| A0A1D3K4Q9 | 50S ribosomal protein L11 OS=Pseudomonas veronii 1YdBTEX2                | Y | Y | Y | 14902 | 10.2437 | CY | CY | J  |
| A0A1D3K4R1 | 50S ribosomal protein L10 OS=Pseudomonas veronii 1YdBTEX2                | Y | Y | Y | 17636 | 9.7061  | CY | CY | J  |
| A0A1D3K4R6 | 50S ribosomal protein L23 OS=Pseudomonas veronii 1YdBTEX2                | Y | Y | Y | 10938 | 10.5088 | CY | CY | J  |
| A0A1D3K4R7 | Bacterioferritin OS=Pseudomonas veronii 1YdBTEX2                         | Y | Y | Y | 18086 | 4.4692  | CY | CY | P  |
| A0A1D3K4R8 | UPF0229 protein PVE_R1G5476 OS=Pseudomonas veronii 1YdBTEX2              | Y | Y | Y | 48607 | 6.4761  | CY | CY | S  |

|            |                                                                                                 |   |   |   |          |         |    |           |        |
|------------|-------------------------------------------------------------------------------------------------|---|---|---|----------|---------|----|-----------|--------|
| A0A1D3K4S6 | 50S ribosomal protein L7/L12 OS=Pseudomonas veronii 1YdBTEX2                                    | Y | Y | Y | 12458    | 4.4517  | CY | CY        | J      |
| A0A1D3K4S9 | 30S ribosomal protein S5 OS=Pseudomonas veronii 1YdBTEX2                                        | Y | Y | Y | 17676    | 10.5454 | CY | CY        | J      |
| A0A1D3K4T9 | Spermidine/putrescine ABC transporter substrate-binding protein OS=Pseudomonas veronii 1YdBTEX2 |   | Y | Y | 37724    | 5.6572  | PR | PR        | EP     |
| A0A1D3K4U0 | 50S ribosomal protein L16 OS=Pseudomonas veronii 1YdBTEX2                                       | Y |   |   | 15419    | 11.7642 | CY | CY        | J      |
| A0A1D3K4U2 | Chaperone SurA OS=Pseudomonas veronii 1YdBTEX2                                                  | Y |   | Y | 49411    | 5.3818  | CY | ML (C, P) | MO     |
| A0A1D3K4U3 | 3_4-dihydroxy-2-butanone 4-phosphate synthase OS=Pseudomonas veronii 1YdBTEX2                   | Y | Y | Y | 39382    | 5.0625  | CY | CY        | H      |
| A0A1D3K4U4 | Coenzyme PQQ synthesis protein B OS=Pseudomonas veronii 1YdBTEX2                                | Y | Y | Y | 33073    | 4.9761  | UK | CY        | P      |
| A0A1D3K4U9 | Elongation factor G OS=Pseudomonas veronii 1YdBTEX2                                             | Y | Y | Y | 77048    | 5.0845  | CY | CY        | JT(mx) |
| A0A1D3K4V1 | LPS-assembly protein LptD OS=Pseudomonas veronii 1YdBTEX2                                       | Y | Y | Y | 104426   | 5.2764  | OM | OM        | M      |
| A0A1D3K4V5 | Long-chain-alcohol dehydrogenase 1 OS=Pseudomonas veronii 1YdBTEX2                              |   |   | Y | 39583    | 5.1504  | CY | CY        | C      |
| A0A1D3K4W0 | Glycine cleavage system transcriptional repressor OS=Pseudomonas veronii 1YdBTEX2               | Y | Y |   | 18200.53 | 5.3     | CY | CY        | ET     |
| A0A1D3K4W5 | Aminoglycoside phosphotransferase OS=Pseudomonas veronii 1YdBTEX2                               | Y |   |   | 38908.08 | 5.2     | CY | CY        | M      |
| A0A1D3K4W6 | Amine oxidase OS=Pseudomonas veronii 1YdBTEX2                                                   | Y |   |   | 62551    | 5.9341  | CY | UK        | EQ     |
| A0A1D3K4W8 | DNA-directed RNA polymerase subunit alpha OS=Pseudomonas veronii 1YdBTEX2                       | Y | Y | Y | 36623    | 4.7183  | CY | CY        | K      |
| A0A1D3K4X6 | TonB-dependent receptor OS=Pseudomonas veronii 1YdBTEX2                                         | Y | Y | Y | 60843    | 5.3994  | OM | OM        | PH     |
| A0A1D3K4Y0 | 30S ribosomal protein S8 OS=Pseudomonas veronii 1YdBTEX2                                        | Y | Y | Y | 14106    | 9.8394  | CY | CY        | J      |
| A0A1D3K4Z6 | Sarcosine oxidase subunit delta OS=Pseudomonas veronii 1YdBTEX2                                 |   | Y |   | 11499    | 5.9282  | CY | CY        | E      |
| A0A1D3K4Z9 | 50S ribosomal protein L29 OS=Pseudomonas veronii 1YdBTEX2                                       | Y | Y | Y | 7167     | 11.1021 | CY | CY        | J      |

|            |                                                                                               |   |   |   |          |        |    |    |        |
|------------|-----------------------------------------------------------------------------------------------|---|---|---|----------|--------|----|----|--------|
| A0A1D3K500 | DNA-directed RNA polymerase subunit beta'<br>OS=Pseudomonas veronii 1YdBTEX2                  | Y | Y | Y | 154570   | 6.8789 | CY | CY | K      |
| A0A1D3K508 | Elongation factor Tu OS=Pseudomonas veronii 1YdBTEX2                                          | Y | Y | Y | 43551    | 5.1943 | CY | CY | JT(mx) |
| A0A1D3K511 | Malate synthase G OS=Pseudomonas veronii 1YdBTEX2                                             |   | Y | Y | 78913    | 5.5269 | CY | CY | C      |
| A0A1D3K526 | N-acetyl-gamma-glutamyl-phosphate reductase<br>OS=Pseudomonas veronii 1YdBTEX2                | Y |   |   | 36618    | 6.3281 | UK | CY | E      |
| A0A1D3K530 | Serine hydroxymethyltransferase OS=Pseudomonas veronii<br>1YdBTEX2                            | Y | Y | Y | 44671    | 6.1904 | UK | CY | E      |
| A0A1D3K535 | Indole-3-glycerol phosphate synthase OS=Pseudomonas<br>veronii 1YdBTEX2                       | Y |   | Y | 30252.05 | 4.99   | CY | CY | E      |
| A0A1D3K540 | Phosphoglycerate kinase OS=Pseudomonas veronii<br>1YdBTEX2                                    | Y | Y |   | 40167    | 4.8706 | UK | CY | FG     |
| A0A1D3K541 | Peptidase M19 OS=Pseudomonas veronii 1YdBTEX2                                                 |   |   | Y | 35862    | 5.3218 | CY | CY | E      |
| A0A1D3K546 | Transketolase OS=Pseudomonas veronii 1YdBTEX2                                                 | Y | Y | Y | 72573    | 4.9248 | CY | CY | CGH    |
| A0A1D3K548 | Uncharacterized protein YeaG OS=Pseudomonas veronii<br>1YdBTEX2                               | Y | Y | Y | 73763    | 5.54   | CY | CY | T      |
| A0A1D3K549 | Sarcosine oxidase subunit beta OS=Pseudomonas veronii<br>1YdBTEX2                             | Y | Y | Y | 45155.73 | 8.2    | UK | CY | EH(mx) |
| A0A1D3K558 | RNA polymerase sigma factor RpoD OS=Pseudomonas<br>veronii 1YdBTEX2                           | Y | Y | Y | 69291    | 4.8516 | CY | CY | K      |
| A0A1D3K560 | Glutamate/aspartate periplasmic-binding protein<br>OS=Pseudomonas veronii 1YdBTEX2            | Y | Y | Y | 32887    | 7.9395 | UK | PR | ET     |
| A0A1D3K563 | Rhamnosyltransferase 1 subunit A OS=Pseudomonas<br>veronii 1YdBTEX2                           | Y | Y | Y | 33028    | 6.4922 | CY | CY | IC     |
| A0A1D3K565 | Pyrroloquinoline-quinone synthase OS=Pseudomonas<br>veronii 1YdBTEX2                          | Y |   | Y | 29030    | 6.4482 | CY | CY | H      |
| A0A1D3K566 | Adenosylmethionine-8-amino-7-oxononanoate<br>aminotransferase OS=Pseudomonas veronii 1YdBTEX2 | Y |   |   | 52365.34 | 5.8    | CY | CY | EH     |
| A0A1D3K569 | Glutathione-independent formaldehyde dehydrogenase<br>OS=Pseudomonas veronii 1YdBTEX2         | Y |   | Y | 42186    | 6.1626 | CY | CY | CE(mx) |
| A0A1D3K571 | Malonyl CoA-acyl carrier protein transacylase<br>OS=Pseudomonas veronii 1YdBTEX2              | Y |   |   | 32206    | 6.6929 | UK | CY | IQ     |

|            |                                                                                                      |   |   |   |          |        |    |    |        |
|------------|------------------------------------------------------------------------------------------------------|---|---|---|----------|--------|----|----|--------|
| A0A1D3K577 | Hydrolase in pqqF 5' region OS=Pseudomonas veronii 1YdBTEX2                                          | Y |   |   | 28745    | 4.6421 | CY | CY | TH(mx) |
| A0A1D3K578 | S-adenosylmethionine synthase OS=Pseudomonas veronii 1YdBTEX2                                        | Y | Y | Y | 45682    | 5.3408 | CY | CY | H      |
| A0A1D3K579 | Methylenetetrahydrofolate reductase OS=Pseudomonas veronii 1YdBTEX2                                  | Y |   |   | 31287    | 5.9795 | CY | CY | E      |
| A0A1D3K591 | Adenosylhomocysteinase OS=Pseudomonas veronii 1YdBTEX2                                               | Y | Y | Y | 51282    | 5.2734 | CY | CY | H      |
| A0A1D3K596 | Aspartate carbamoyltransferase OS=Pseudomonas veronii 1YdBTEX2                                       | Y | Y | Y | 36358.97 | 7.14   | CY | CY | EF     |
| A0A1D3K5A5 | Uncharacterized protein OS=Pseudomonas veronii 1YdBTEX2                                              |   |   | Y | 7179     | 5.8682 | PR | UK | X      |
| A0A1D3K5A9 | Thioesterase OS=Pseudomonas veronii 1YdBTEX2                                                         | Y | Y | Y | 15057    | 7.314  | CY | CY | IQ     |
| A0A1D3K5B8 | Aldehyde dehydrogenase OS=Pseudomonas veronii 1YdBTEX2                                               | Y |   | Y | 52119    | 8.8096 | IM | CY | C      |
| A0A1D3K5C8 | Thiazole synthase OS=Pseudomonas veronii 1YdBTEX2                                                    | Y | Y | Y | 28288    | 5.0376 | CY | CY | H      |
| A0A1D3K5D1 | Dihydroxy-acid dehydratase OS=Pseudomonas veronii 1YdBTEX2                                           | Y |   |   | 65664    | 5.7085 | CY | CY | EG     |
| A0A1D3K5D5 | UPF0312 protein PVE_R1G5612 OS=Pseudomonas veronii 1YdBTEX2                                          | Y | Y | Y | 21272    | 7.8135 | PR | UK | O      |
| A0A1D3K5D8 | 4-deoxy-4-formamido-L-arabinose-phosphoundecaprenol deformylase ArnD OS=Pseudomonas veronii 1YdBTEX2 | Y | Y | Y | 79551    | 6.2769 | IM | IM | PC     |
| A0A1D3K5F0 | RNA pyrophosphohydrolase OS=Pseudomonas veronii 1YdBTEX2                                             | Y | Y | Y | 18868.82 | 9.3    | CY | CY | LF     |
| A0A1D3K5G0 | ATPase OS=Pseudomonas veronii 1YdBTEX2                                                               | Y | Y | Y | 15344    | 9.3003 | PR | UK | S      |
| A0A1D3K5H0 | Spermidine-binding periplasmic protein SpuE OS=Pseudomonas veronii 1YdBTEX2                          | Y | Y | Y | 39932    | 5.9912 | PR | PR | P      |
| A0A1D3K5I5 | Fructose-1_6-bisphosphate aldolase OS=Pseudomonas veronii 1YdBTEX2                                   | Y |   | Y | 38385    | 5.291  | PR | CY | G      |
| A0A1D3K5J1 | Ribosomal RNA small subunit methyltransferase E OS=Pseudomonas veronii 1YdBTEX2                      | Y |   |   | 26271    | 5.7671 | CY | UK | J      |
| A0A1D3K5K2 | Glutamine synthetase OS=Pseudomonas veronii 1YdBTEX2                                                 | Y | Y | Y | 51023    | 4.8311 | CY | CY | E      |

|            |                                                                                                   |   |   |   |          |        |    |             |        |
|------------|---------------------------------------------------------------------------------------------------|---|---|---|----------|--------|----|-------------|--------|
| A0A1D3K5K4 | Gamma aminobutyrate transaminase 1_ mitochondrial OS=Pseudomonas veronii 1YdBTEX2                 | Y | Y | Y | 49859    | 5.6689 | CY | CY          | EH(mx) |
| A0A1D3K5K5 | Probable binding protein component of ABC iron transporter PA5217 OS=Pseudomonas veronii 1YdBTEX2 | Y |   |   | 36676    | 6.2651 | PR | PR          | P      |
| A0A1D3K5L2 | Anaerobically-induced outer membrane porin OprE OS=Pseudomonas veronii 1YdBTEX2                   | Y | Y | Y | 47187    | 5.6455 | OM | OM          | S      |
| A0A1D3K5L4 | Transporter OS=Pseudomonas veronii 1YdBTEX2                                                       | Y | Y | Y | 34637    | 7.6758 | OM | IM          | MVI    |
| A0A1D3K5L7 | Dihydroorotase-like protein OS=Pseudomonas veronii 1YdBTEX2                                       | Y | Y | Y | 44042    | 5.2983 | UK | CY          | FQ(mx) |
| A0A1D3K5L8 | Putrescine-binding periplasmic protein SpuD OS=Pseudomonas veronii 1YdBTEX2                       | Y | Y | Y | 40054    | 6.5391 | CY | PR          | PE     |
| A0A1D3K5L9 | Thioredoxin OS=Pseudomonas veronii 1YdBTEX2                                                       | Y |   |   | 11764    | 4.6553 | CY | CY          | O      |
| A0A1D3K5M3 | Gamma-glutamylputrescine synthetase PuuA OS=Pseudomonas veronii 1YdBTEX2                          | Y | Y | Y | 50968    | 4.6538 | CY | CY          | E      |
| A0A1D3K5M7 | Exopolyphosphatase OS=Pseudomonas veronii 1YdBTEX2                                                | Y |   |   | 56026    | 6.1025 | CY | CY          | FP     |
| A0A1D3K5N7 | UPF0149 protein PFL_5969 OS=Pseudomonas veronii 1YdBTEX2                                          | Y |   |   | 19768.75 | 4.2    | CY | UK          | L      |
| A0A1D3K5N9 | Uncharacterized ABC transporter ATP-binding protein YheS OS=Pseudomonas veronii 1YdBTEX2          |   |   | Y | 70801    | 5.3496 | CY | ML (CY, OM) | VH(mx) |
| A0A1D3K5P0 | Gamma-glutamylcyclotransferase OS=Pseudomonas veronii 1YdBTEX2                                    | Y |   |   | 24595.21 | 7.7    | CY | CY          | P      |
| A0A1D3K5P2 | D-3-phosphoglycerate dehydrogenase OS=Pseudomonas veronii 1YdBTEX2                                | Y | Y | Y | 44303    | 6.0747 | CY | CY          | EH(mx) |
| A0A1D3K5P5 | Uroporphyrin-III C-methyltransferase OS=Pseudomonas veronii 1YdBTEX2                              | Y | Y |   | 40390    | 5.0713 | IM | IM          | H      |
| A0A1D3K5Q0 | GMC family oxidoreductase OS=Pseudomonas veronii 1YdBTEX2                                         | Y |   | Y | 57177    | 6.7383 | UK | UK          | EC     |
| A0A1D3K5Q1 | UDP-4-amino-4-deoxy-L-arabinose--oxoglutarate aminotransferase OS=Pseudomonas veronii 1YdBTEX2    | Y | Y | Y | 41290    | 5.2119 | CY | CY          | E      |
| A0A1D3K5R1 | Cell division protein ZapA OS=Pseudomonas veronii 1YdBTEX2                                        | Y | Y | Y | 11579.9  | 5.64   | CY | UK          | D      |
| A0A1D3K5R3 | Probable 3-mercaptopyruvate sulfurtransferase OS=Pseudomonas veronii 1YdBTEX2                     | Y |   | Y | 30795    | 5.105  | CY | CY          | P      |

|            |                                                                                       |   |   |   |          |         |    |            |        |
|------------|---------------------------------------------------------------------------------------|---|---|---|----------|---------|----|------------|--------|
| A0A1D3K5R5 | Delta-aminolevulinic acid dehydratase OS=Pseudomonas veronii 1YdBTEX2                 | Y | Y |   | 36996    | 4.9438  | CY | CY         | H      |
| A0A1D3K5S1 | sn-glycerol-3-phosphate transporter OS=Pseudomonas veronii 1YdBTEX2                   | Y |   | Y | 17731    | 9.5112  | EX | UK         | S      |
| A0A1D3K5S6 | Uncharacterized protein OS=Pseudomonas veronii 1YdBTEX2                               | Y | Y | Y | 34757    | 11.0405 | CY | UK         | S      |
| A0A1D3K5S7 | Polyphosphate kinase OS=Pseudomonas veronii 1YdBTEX2                                  | Y | Y | Y | 82954.62 | 6.78    | OM | ML (C, IM) | P      |
| A0A1D3K5T3 | Aminomethyltransferase OS=Pseudomonas veronii 1YdBTEX2                                | Y |   |   | 39553    | 5.7788  | CY | CY         | EC     |
| A0A1D3K5U2 | Spermidine/putrescine import ATP-binding protein PotA OS=Pseudomonas veronii 1YdBTEX2 | Y | Y | Y | 42374    | 5.9355  | CY | IM         | PE(mx) |
| A0A1D3K5U9 | Argininosuccinate lyase OS=Pseudomonas veronii 1YdBTEX2                               |   | Y |   | 51568    | 5.521   | CY | CY         | EF     |
| A0A1D3K5Y5 | Chemotaxis protein OS=Pseudomonas veronii 1YdBTEX2                                    | Y |   | Y | 70053    | 5.1577  | IM | IM         | NT(mx) |
| A0A1D3K5Z6 | Transcription termination factor Rho OS=Pseudomonas veronii 1YdBTEX2                  | Y | Y | Y | 46938    | 7.5352  | CY | CY         | KU(mx) |
| A0A1D3K5Z7 | Aldehyde dehydrogenase PuuC OS=Pseudomonas veronii 1YdBTEX2                           | Y | Y | Y | 52651    | 5.4478  | CY | CY         | CK     |
| A0A1D3K5Z8 | Glycine cleavage system H protein OS=Pseudomonas veronii 1YdBTEX2                     | Y |   |   | 13179.61 | 4.22    | CY | UK         | E      |
| A0A1D3K607 | Phosphomannomutase/phosphoglucomutase OS=Pseudomonas veronii 1YdBTEX2                 | Y | Y | Y | 50548    | 5.3657  | CY | CY         | GJM    |
| A0A1D3K616 | Biopolymer transport protein ExbB OS=Pseudomonas veronii 1YdBTEX2                     | Y | Y | Y | 29676.73 | 6.6     | IM | IM         | U      |
| A0A1D3K628 | Uncharacterized protein OS=Pseudomonas veronii 1YdBTEX2                               | Y |   |   | 6569     | 5.0669  | CY | UK         | T      |
| A0A1D3K635 | Serine hydroxymethyltransferase OS=Pseudomonas veronii 1YdBTEX2                       | Y |   |   | 46173    | 6.2871  | CY | CY         | E      |
| A0A1D3K642 | Glyoxalase OS=Pseudomonas veronii 1YdBTEX2                                            |   | Y |   | 23116.76 | 4.92    | CY | CY         | Q      |
| A0A1D3K653 | LysR family transcriptional regulator OS=Pseudomonas veronii 1YdBTEX2                 | Y | Y |   | 33503.74 | 6.49    | CY | CY         | K      |
| A0A1D3K654 | Protein ClpV1 OS=Pseudomonas veronii 1YdBTEX2                                         | Y |   | Y | 96909    | 5.4185  | CY | CY         | OL(mx) |

|            |                                                                                           |   |   |   |          |         |    |             |        |
|------------|-------------------------------------------------------------------------------------------|---|---|---|----------|---------|----|-------------|--------|
| A0A1D3K666 | Biopolymer transport protein ExbD OS=Pseudomonas veronii 1YdBTEX2                         | Y |   |   | 15211    | 4.6714  | PR | IM          | U      |
| A0A1D3K671 | EvpB family type VI secretion protein OS=Pseudomonas veronii 1YdBTEX2                     | Y |   | Y | 55675    | 5.1196  | CY | CY          | K      |
| A0A1D3K673 | Aspartate ammonia-lyase OS=Pseudomonas veronii 1YdBTEX2                                   | Y | Y | Y | 51058    | 5.3745  | CY | CY          | ECF    |
| A0A1D3K674 | Uncharacterized protein OS=Pseudomonas veronii 1YdBTEX2                                   | Y |   | Y | 18388    | 5.1064  | UK | CY          | K      |
| A0A1D3K679 | Type VI secretion protein ImpA OS=Pseudomonas veronii 1YdBTEX2                            | Y | Y |   | 36751.68 | 4.56    | CY | UK          | M      |
| A0A1D3K684 | N5-carboxyaminoimidazole ribonucleotide mutase OS=Pseudomonas veronii 1YdBTEX2            |   | Y |   | 16907    | 6.3237  | UK | UK          | F      |
| A0A1D3K692 | Phosphate regulon transcriptional regulatory protein PhoB OS=Pseudomonas veronii 1YdBTEX2 | Y |   |   | 25565.33 | 5.25    | CY | CY          | KT     |
| A0A1D3K696 | LysR family transcriptional regulator OS=Pseudomonas veronii 1YdBTEX2                     |   |   | Y | 36345    | 8.2529  | CY | CY          | K      |
| A0A1D3K699 | Uncharacterized protein OS=Pseudomonas veronii 1YdBTEX2                                   |   | Y | Y | 13695    | 8.7466  | PR | PR          | P      |
| A0A1D3K6A1 | Pyruvate carboxylase subunit B OS=Pseudomonas veronii 1YdBTEX2                            | Y | Y | Y | 65353    | 5.4243  | CY | CY          | CQ(mx) |
| A0A1D3K6A5 | Protein hcp1 OS=Pseudomonas veronii 1YdBTEX2                                              | Y | Y | Y | 17507    | 6.5068  | CY | EX          | S      |
| A0A1D3K6A7 | D-amino acid dehydrogenase OS=Pseudomonas veronii 1YdBTEX2                                | Y | Y | Y | 47149.32 | 8.18    | PR | ML (C a IM) | EH(mx) |
| A0A1D3K6A9 | Phosphate-binding protein OS=Pseudomonas veronii 1YdBTEX2                                 | Y | Y | Y | 34609    | 9.1538  | OM | IM          | P      |
| A0A1D3K6E1 | Cytochrome c domain-containing protein OS=Pseudomonas veronii 1YdBTEX2                    |   |   | Y | 9064.5   | 6.8     | CY | UK          | C      |
| A0A1D3K6E4 | DNA-binding protein HU-alpha OS=Pseudomonas veronii 1YdBTEX2                              | Y | Y | Y | 9814     | 10.6743 | CY | CY          | LK     |
| A0A1D3K6E7 | Gly-zipper_YMGG domain-containing protein OS=Pseudomonas veronii 1YdBTEX2                 | Y |   |   | 32460    | 9.5142  | OM | UK          | MI     |
| A0A1D3K6F2 | Chemotaxis protein CheY OS=Pseudomonas veronii 1YdBTEX2                                   | Y | Y | Y | 32512.18 | 8.95    | CY | CY          | TK     |

|            |                                                                                                |   |   |   |          |        |    |    |        |
|------------|------------------------------------------------------------------------------------------------|---|---|---|----------|--------|----|----|--------|
| A0A1D3K6H5 | DNA-directed RNA polymerase subunit omega OS=Pseudomonas veronii 1YdBTEX2                      |   | Y |   | 9820     | 4.103  | CY | CY | K      |
| A0A1D3K6I0 | Probable fatty acid methyltransferase OS=Pseudomonas veronii 1YdBTEX2                          | Y |   | Y | 44080    | 5.272  | CY | CY | QH(mx) |
| A0A1D3K6L5 | Biotin carboxylase OS=Pseudomonas veronii 1YdBTEX2                                             | Y |   |   | 51846.68 | 6.13   | CY | CY | IF     |
| A0A1D3K6M0 | Uncharacterized protein OS=Pseudomonas veronii 1YdBTEX2                                        | Y |   |   | 51938.76 | 6.1    | CY | CY | S      |
| A0A1D3K6N0 | Bifunctional protein GlmU OS=Pseudomonas veronii 1YdBTEX2                                      | Y | Y | Y | 48747.57 | 6.4    | CY | CY | JM     |
| A0A1D3K6N5 | ATP synthase subunit beta OS=Pseudomonas veronii 1YdBTEX2                                      | Y | Y |   | 49488    | 4.7241 | CY | CY | CNU    |
| A0A1D3K6Q5 | ATP synthase subunit delta OS=Pseudomonas veronii 1YdBTEX2                                     | Y |   |   | 19302.22 | 5.42   | CY | CY | TU     |
| A0A1D3K6Q6 | ATP synthase subunit alpha OS=Pseudomonas veronii 1YdBTEX2                                     | Y | Y | Y | 55301    | 5.3027 | CY | CY | CNU    |
| A0A1D3K6R9 | ATP synthase gamma chain OS=Pseudomonas veronii 1YdBTEX2                                       | Y | Y | Y | 31434    | 8.1577 | CY | CY | C      |
| A0A1D3K6U7 | ATP synthase subunit b OS=Pseudomonas veronii                                                  | Y | Y | Y | 16832    | 6.1055 | IM | IM | S      |
| A0A1D3K6V4 | Aldehyde dehydrogenase OS=Pseudomonas veronii 1YdBTEX2                                         | Y |   |   | 18024    | 5.8491 | OM | UK | M      |
| A0A1D3K6V8 | Transposase OS=Pseudomonas veronii 1YdBTEX2                                                    |   |   | Y | 57419    | 8.5063 | CY | CY | KL     |
| A0A1D3K6V9 | Glutamine--fructose-6-phosphate aminotransferase [isomerizing] OS=Pseudomonas veronii 1YdBTEX2 | Y | Y | Y | 66081    | 5.7437 | CY | CY | MF     |
| A0A1D3K6X1 | DNA polymerase OS=Pseudomonas veronii 1YdBTEX2                                                 | Y |   |   | 17365    | 7.1162 | CY | UK | X      |
| A0A1D3K710 | Tn7 transposition protein B OS=Pseudomonas veronii 1YdBTEX2                                    | Y |   |   | 82430.26 | 8.35   | CY | CY | L      |
| A0A1D3K723 | PLDc_2 domain-containing protein OS=Pseudomonas veronii 1YdBTEX2                               | Y |   |   | 37719.17 | 6.1    | CY | CY | L      |
| A0A1D3K730 | Aldehyde dehydrogenase OS=Pseudomonas veronii 1YdBTEX2                                         |   | Y | Y | 18054    | 7.377  | OM | UK | M      |
| A0A1D3K738 | Uncharacterized protein OS=Pseudomonas veronii 1YdBTEX2                                        |   |   | Y | 7719     | 9.2578 | CY | UK | S      |
| A0A1D3K740 | Membrane protein OS=Pseudomonas veronii 1YdBTEX2                                               | Y |   |   | 26561.88 | 5.99   | IM | UK | MU     |

|            |                                                                             |   |   |   |          |        |    |    |    |
|------------|-----------------------------------------------------------------------------|---|---|---|----------|--------|----|----|----|
| A0A1D3K765 | Catabolite gene activator protein OS=Pseudomonas veronii 1YdBTEX2           |   |   | Y | 27055    | 8.6865 | CY | UK | KT |
| A0A1D3K7B5 | Uncharacterized protein OS=Pseudomonas veronii 1YdBTEX2                     | Y | Y | Y | 62364.94 | 5.61   | CY | CY | CI |
| A0A1D3K7D2 | Twitching motility protein OS=Pseudomonas veronii 1YdBTEX2                  |   |   | Y | 38383    | 9.2417 | CY | CY | NU |
| A0A1D3K7I1 | Fe2OG dioxygenase domain-containing protein OS=Pseudomonas veronii 1YdBTEX2 |   | Y | Y | 24186    | 5.2207 | CY | UK | O  |
| A0A1D3K7N6 | Hypothetical membrane protein OS=Pseudomonas veronii 1YdBTEX2               |   | Y |   | 8460     | 9.1069 | IM | IM | M  |
| A0A1D3K7P1 | Uncharacterized protein OS=Pseudomonas veronii 1YdBTEX2                     | Y |   |   | 11486.82 | 8.84   | PR | UK | J  |
| A0A1D3K7S1 | AraC family transcriptional regulator OS=Pseudomonas veronii 1YdBTEX2       |   |   | Y | 21295    | 9.8979 | CY | CY | K  |
| A0A1D3K7T3 | Helicase OS=Pseudomonas veronii 1YdBTEX2                                    | Y |   |   | 36795.03 | 9.8    | CY | UK | L  |
| A0A1D3K7Z3 | Starvation protein A OS=Pseudomonas veronii 1YdBTEX2                        | Y | Y |   | 21635.01 | 6.2    | UK | CY | O  |
| A0A1D3K820 | Uncharacterized protein OS=Pseudomonas veronii 1YdBTEX2                     | Y |   |   | 13768.92 | 6.21   | CY | UK | S  |
| A0A1D3K825 | Uncharacterized protein OS=Pseudomonas veronii 1YdBTEX2                     |   |   | Y | 6552     | 3.5977 | UK | UK | X  |
| A0A1D3K830 | Uncharacterized protein OS=Pseudomonas veronii 1YdBTEX2                     |   |   | Y | 27756    | 4.2715 | CY | UK | X  |
| A0A1D3K842 | Uncharacterized protein OS=Pseudomonas veronii 1YdBTEX2                     |   | Y |   | 35771    | 7.2935 | CY | CY | K  |
| A0A1D3K887 | Uncharacterized protein OS=Pseudomonas veronii 1YdBTEX2                     | Y | Y | Y | 17064.53 | 6.28   | CY | UK | X  |
| A0A1D3K8A2 | Transposase OS=Pseudomonas veronii 1YdBTEX2                                 | Y |   |   | 36904.55 | 9.75   | CY | CY | L  |
| A0A1D3K8B8 | Uncharacterized protein OS=Pseudomonas veronii 1YdBTEX2                     |   | Y |   | 13999    | 4.6538 | CY | CY | X  |
| A0A1D3K8L4 | Uncharacterized protein OS=Pseudomonas veronii 1YdBTEX2                     | Y |   |   | 14936.91 | 4.34   | CY | UK | X  |
| A0A1D3K8L6 | Hypothetical secreted protein OS=Pseudomonas veronii 1YdBTEX2               |   | Y |   | 5362     | 6.1772 | UK | IM | X  |

|            |                                                                                                  |   |   |   |          |        |    |             |        |
|------------|--------------------------------------------------------------------------------------------------|---|---|---|----------|--------|----|-------------|--------|
| A0A1D3K8Q8 | Chemotaxis protein OS=Pseudomonas veronii 1YdBTEX2                                               |   |   | Y | 34682    | 4.6626 | UK | ML (CY, IM) | NT     |
| A0A1D3K8S2 | Methyl-accepting chemotaxis protein OS=Pseudomonas veronii 1YdBTEX2                              | Y |   |   | 28643    | 4.4443 | UK | ML (C, IM)  | NT     |
| A0A1D3K8V4 | Transposase OS=Pseudomonas veronii 1YdBTEX2                                                      | Y |   |   | 41498.22 | 9.73   | PR | UK          | KL     |
| A0A1D3K906 | CatO2ase OS=Pseudomonas veronii 1YdBTEX2                                                         | Y |   | Y | 35016    | 5.5122 | CY | CY          | E      |
| A0A1D3K908 | 4-hydroxy-2-oxovalerate aldolase OS=Pseudomonas veronii 1YdBTEX2                                 |   |   | Y | 37151    | 5.5459 | CY | CY          | EQ     |
| A0A1D3K930 | Isopropylbenzene dioxygenase_ iron-sulfur protein_ small subunit OS=Pseudomonas veronii 1YdBTEX2 |   | Y | Y | 21759    | 5.7993 | CY | CY          | Q      |
| A0A1D3K961 | Uncharacterized protein OS=Pseudomonas veronii 1YdBTEX2                                          |   | Y |   | 7550     | 3.9756 | CY | UK          | X      |
| A0A1D3K963 | Uncharacterized protein OS=Pseudomonas veronii 1YdBTEX2                                          |   |   | Y | 13499    | 6.1318 | CY | UK          | S      |
| A0A1D3K967 | Transposase OS=Pseudomonas veronii 1YdBTEX2                                                      | Y |   |   | 115041.3 | 6.89   | CY | CY          | L      |
| A0A1D3K973 | Acetaldehyde dehydrogenase OS=Pseudomonas veronii 1YdBTEX2                                       |   |   | Y | 32661    | 5.4946 | UK | UK          | Q      |
| A0A1D3K985 | Uncharacterized protein OS=Pseudomonas veronii 1YdBTEX2                                          | Y |   |   | 13829    | 5.0684 | CY | CY          | S      |
| A0A1D3K990 | Uncharacterized protein OS=Pseudomonas veronii 1YdBTEX2                                          |   |   | Y | 21096    | 9.5273 | UK | UK          | S      |
| A0A1D3K9A2 | Integrase OS=Pseudomonas veronii 1YdBTEX2                                                        | Y | Y |   | 76864.24 | 7.96   | CY | CY          | L      |
| A0A1D3K9A5 | Single-stranded DNA-binding protein OS=Pseudomonas veronii 1YdBTEX2                              |   | Y |   | 18424    | 7.1763 | CY | CY          | L      |
| A0A1D3K9C6 | Ferredoxin_ plant-type OS=Pseudomonas veronii 1YdBTEX2                                           |   |   | Y | 12510    | 7.7285 | CY | CY          | C      |
| A0A1D3K9G1 | Hydrogenase transcriptional regulatory protein HoxA OS=Pseudomonas veronii 1YdBTEX2              | Y | Y | Y | 54378.59 | 6.35   | CY | CY          | TK     |
| A0A1D3K9G5 | Multidrug ABC transporter ATP-binding protein OS=Pseudomonas veronii 1YdBTEX2                    | Y |   | Y | 11137    | 4.3652 | CY | IM          | VE(mx) |
| A0A1D3K9L9 | PLD phosphodiesterase domain-containing protein OS=Pseudomonas veronii 1YdBTEX2                  |   |   | Y | 46914    | 6.6152 | CY | UK          | LI     |
| A0A1D3K9P9 | Porin D OS=Pseudomonas veronii 1YdBTEX2                                                          | Y |   |   | 48747    | 4.9512 | OM | OM          | S      |
| A0A1D3K9V8 | Probable family 20 transposase OS=Pseudomonas veronii 1YdBTEX2                                   | Y | Y |   | 38487.71 | 10.37  | CY | CY          | L      |

|            |                                                                           |   |   |   |          |         |    |    |        |
|------------|---------------------------------------------------------------------------|---|---|---|----------|---------|----|----|--------|
| A0A1D3K9Y9 | Inner membrane transport permease YhhJ<br>OS=Pseudomonas veronii 1YdBTEX2 |   |   | Y | 41656    | 5.647   | IM | IM | VM(mx) |
| A0A1D3K9Z4 | Uncharacterized oxidoreductase Mb2924c<br>OS=Pseudomonas veronii 1YdBTEX2 | Y |   |   | 66645.04 | 6.58    | CY | CY | C      |
| A0A1D3KA55 | Twitching motility protein PilT OS=Pseudomonas veronii<br>1YdBTEX2        | Y |   |   | 15176    | 7.3198  | CY | UK | G      |
| A0A1D3KA82 | Resolvase OS=Pseudomonas veronii 1YdBTEX2                                 | Y |   |   | 34495.98 | 9.12    | CY | CY | L      |
| A0A1D3KA96 | Uncharacterized protein OS=Pseudomonas veronii<br>1YdBTEX2                |   |   | Y | 13485    | 8.228   | CY | CY | S      |
| A0A1D3KAA8 | Hypothetical secreted protein OS=Pseudomonas veronii<br>1YdBTEX2          | Y |   |   | 10097.72 | 5.65    | OM | UK | S      |
| A0A1D3KAD4 | Uncharacterized protein Yhil OS=Pseudomonas veronii<br>1YdBTEX2           | Y |   |   | 38102.14 | 5.32    | OM | IM | MU     |
| A0A1D3KAD8 | InaA protein OS=Pseudomonas veronii 1YdBTEX2                              | Y |   |   | 26991.18 | 9.97    | CY | CY | QT(mx) |
| A0A1D3KAH4 | Transposase OS=Pseudomonas veronii 1YdBTEX2                               | Y |   | Y | 30804.09 | 7.71    | CY | CY | L      |
| A0A1D3KAH6 | Sex pilus assembly protein OS=Pseudomonas veronii<br>1YdBTEX2             | Y | Y | Y | 24950.81 | 9.2     | CY | UK | S      |
| A0A1D3KAI3 | Conjugal transfer protein OS=Pseudomonas veronii<br>1YdBTEX2              | Y |   |   | 33481.02 | 6.34    | PR | PR | CO     |
| A0A1D3KAI6 | ATPase OS=Pseudomonas veronii 1YdBTEX2                                    | Y |   |   | 38095    | 6.5186  | EX | UK | CTL    |
| A0A1D3KAI8 | Transposase OS=Pseudomonas veronii 1YdBTEX2                               |   |   | Y | 13916    | 10.0342 | UK | UK | L      |
| A0A1D3KAJ5 | Cysteine peptidase OS=Pseudomonas veronii 1YdBTEX2                        | Y | Y | Y | 25674.31 | 6.22    | CY | CY | S      |
| A0A1D3KAP2 | Uncharacterized protein OS=Pseudomonas veronii<br>1YdBTEX2                | Y |   |   | 37771.66 | 5.55    | CY | CY | D      |

**Supplementary Table S5. Annotations of significantly changed (fold>1.8; ANOVA p<0.05; fitted Tukey's HSD thresholds) proteins of *P. veronii*.** Functional distribution: C-Energy production and conversion; D-Cell cycle control, cell division, chromosome partitioning; E-Amino acid metabolism and transport; F-Nucleotide metabolism and transport; H-Coenzyme transport and metabolism; I-Lipid transport and metabolism; K-Transcription; M-Cell wall/membrane/envelop biogenesis; N-Cell motility; O-Post-translational modification, protein turnover, and chaperone functions; P-Inorganic ion transport and metabolism; Q-Secondary metabolites biosynthesis, transport, and

**Upregulated**

| UNIPROT<br>Accession | Protein name                                                                        | MW [Da]  | pI     | Localizat<br>SOSUIGr<br>amN | PSORTb | Function<br>COGS |
|----------------------|-------------------------------------------------------------------------------------|----------|--------|-----------------------------|--------|------------------|
| A0A1D3JPP4           | Short-chain dehydrogenase OS=Pseudomonas veronii 1YdBTEX2                           | 26581    | 6.4263 | CY                          | CY     | IQ               |
| A0A1D3JPQ1           | Cytochrome P450 OS=Pseudomonas veronii 1YdBTEX2                                     | 44493    | 5.6118 | CY                          | CY     | CQ               |
| A0A1D3JPT9           | Transporter OS=Pseudomonas veronii 1YdBTEX2                                         | 55429.58 | 6.3    | PR                          | UK     | MU               |
| A0A1D3JQ11           | Butanediol dehydrogenase OS=Pseudomonas veronii 1YdBTEX2                            | 38566    | 5.6162 | UK                          | CY     | CE(mx)           |
| A0A1D3JQ27           | Cystine-binding periplasmic protein OS=Pseudomonas veronii 1YdBTEX2                 | 28611    | 9.271  | CY                          | PR     | ET               |
| A0A1D3JQ78           | Sulfate/thiosulfate import ATP-binding protein CysA OS=Pseudomonas veronii 1YdBTEX2 | 36633.05 | 6.1    | CY                          | IM     | PQ(mx)           |
| A0A1D3JQB2           | Porin D OS=Pseudomonas veronii 1YdBTEX2                                             | 46511    | 6.1582 | OM                          | OM     | S                |
| A0A1D3JQC6           | TetR family transcriptional regulator OS=Pseudomonas veronii 1YdBTEX2               | 20041    | 5.2046 | CY                          | CY     | K                |
| A0A1D3JRB4           | Porin OS=Pseudomonas veronii 1YdBTEX2                                               | 48295    | 6.1582 | EX                          | OM     | S                |
| A0A1D3JRE5           | Short-chain dehydrogenase OS=Pseudomonas veronii 1YdBTEX2                           | 24432.75 | 7.3    | CY                          | EX     | IQ               |

|            |                                                                                                         |          |        |    |    |     |
|------------|---------------------------------------------------------------------------------------------------------|----------|--------|----|----|-----|
| A0A1D3JRS4 | Periplasmic dipeptide transport protein OS=Pseudomonas veronii 1YdBTEX2                                 | 58644    | 6.1831 | PR | PR | E   |
| A0A1D3JRW1 | Porin OS=Pseudomonas veronii 1YdBTEX2                                                                   | 50660    | 6.1758 | OM | OM | S   |
| A0A1D3JS15 | Uncharacterized protein OS=Pseudomonas veronii 1YdBTEX2                                                 | 66959    | 5.2368 | EX | OM | X   |
| A0A1D3JSC3 | Fumarylacetoacetase OS=Pseudomonas veronii 1YdBTEX2                                                     | 46311    | 5.1489 | UK | CY | Q   |
| A0A1D3JSV4 | Ferredoxin--NADP reductase OS=Pseudomonas veronii 1YdBTEX2                                              | 29756    | 5.9092 | CY | CY | C   |
| A0A1D3JSW6 | Glutamate/aspartate periplasmic-binding protein OS=Pseudomonas veronii 1YdBTEX2                         | 33370    | 8.5986 | PR | PR | ET  |
| A0A1D3JSX5 | Bacterioferritin OS=Pseudomonas veronii 1YdBTEX2                                                        | 17901    | 4.6963 | CY | CY | P   |
| A0A1D3JT07 | Adenosylmethionine-8-amino-7-oxononanoate aminotransferase OS=Pseudomonas veronii 1YdBTEX2              | 52137.2  | 5.77   | CY | CY | EH  |
| A0A1D3JT64 | Lysine/arginine/ornithine-binding periplasmic protein OS=Pseudomonas veronii 1YdBTEX2                   | 27426    | 6.189  | PR | PR | ET  |
| A0A1D3JT88 | Membrane protein OS=Pseudomonas veronii 1YdBTEX2                                                        | 15847    | 9.4834 | PR | OM | MI  |
| A0A1D3JT92 | Leucine-_ isoleucine-_ valine-_ threonine-_ and alanine-binding protein OS=Pseudomonas veronii 1YdBTEX2 | 39740    | 6.4468 | PR | PR | E   |
| A0A1D3JTA7 | Protocatechuate 3_4-dioxygenase subunit alpha OS=Pseudomonas veronii 1YdBTEX2                           | 20539    | 4.8369 | CY | CY | Q   |
| A0A1D3JTJ5 | Toluene efflux pump periplasmic linker protein TtgA OS=Pseudomonas veronii 1YdBTEX2                     | 38820.31 | 6.75   | PR | IM | MVP |
| A0A1D3JU31 | CSD domain-containing protein OS=Pseudomonas veronii 1YdBTEX2                                           | 7782     | 7.6494 | CY | CY | KL  |
| A0A1D3JUF4 | Hypothetical secreted protein OS=Pseudomonas veronii 1YdBTEX2                                           | 8117     | 5.0054 | PR | UK | M   |
| A0A1D3JUR8 | Translational regulator CsrA OS=Pseudomonas veronii 1YdBTEX2                                            | 6962.78  | 6.53   | UK | UK | T   |

|            |                                                                                                     |          |        |    |            |        |
|------------|-----------------------------------------------------------------------------------------------------|----------|--------|----|------------|--------|
| A0A1D3JV13 | Uncharacterized protein OS=Pseudomonas veronii 1YdBTEX2                                             | 63142.31 | 4.93   | CY | UK         | S      |
| A0A1D3JVA1 | Uncharacterized protein OS=Pseudomonas veronii 1YdBTEX2                                             | 23214    | 4.9878 | OM | EX         | FT     |
| A0A1D3JVA8 | Membrane protein OS=Pseudomonas veronii 1YdBTEX2                                                    | 42373    | 4.6743 | OM | OM         | M      |
| A0A1D3JVB3 | Amino acid ABC transporter substrate-binding protein OS=Pseudomonas veronii 1YdBTEX2                | 32896    | 4.7988 | PR | PR         | ET     |
| A0A1D3JVC5 | Membrane protein OS=Pseudomonas veronii 1YdBTEX2                                                    | 34907    | 5.7832 | OM | UK         | DZ(mx) |
| A0A1D3JVD0 | Cytochrome C OS=Pseudomonas veronii 1YdBTEX2                                                        | 16392    | 5.1475 | PR | UK         | CT     |
| A0A1D3JVD1 | Quinoprotein ethanol dehydrogenase OS=Pseudomonas veronii 1YdBTEX2                                  | 69501    | 6.7207 | OM | PR         | CH     |
| A0A1D3JVD3 | Aldehyde dehydrogenase OS=Pseudomonas veronii 1YdBTEX2                                              | 55001    | 5.3672 | CY | CY         | CK     |
| A0A1D3JVK4 | Quinoprotein ethanol dehydrogenase OS=Pseudomonas veronii 1YdBTEX2                                  | 64522    | 8.0405 | PR | PR         | GC     |
| A0A1D3JVQ9 | Branched-chain amino acid ABC transporter substrate-binding protein OS=Pseudomonas veronii 1YdBTEX2 | 43111    | 5.9839 | PR | UK         | E      |
| A0A1D3JW46 | ABC transporter substrate-binding protein OS=Pseudomonas veronii 1YdBTEX2                           | 64816    | 5.8125 | EX | OM         | EP     |
| A0A1D3JWQ8 | Uncharacterized protein OS=Pseudomonas veronii 1YdBTEX2                                             | 35432.99 | 5.54   | PR | UK         | FG     |
| A0A1D3JWV4 | Nitrate reductase (quinone) OS=Pseudomonas veronii 1YdBTEX2                                         | 140747   | 6.104  | CY | ML (C, IM) | C      |
| A0A1D3JX42 | von Willebrand factor A OS=Pseudomonas veronii 1YdBTEX2                                             | 40132.58 | 8.85   | IM | IM         | MH(mx) |
| A0A1D3JXF4 | TonB-dependent receptor OS=Pseudomonas veronii 1YdBTEX2                                             | 78594    | 4.8794 | OM | OM         | PH     |
| A0A1D3JXG1 | Biotin carboxylase OS=Pseudomonas veronii 1YdBTEX2                                                  | 61095    | 5.5371 | UK | CY         | IC     |

|            |                                                                                                  |          |        |    |    |    |
|------------|--------------------------------------------------------------------------------------------------|----------|--------|----|----|----|
| A0A1D3JXL3 | Uncharacterized protein OS=Pseudomonas veronii 1YdBTEX2                                          | 12383    | 9.3237 | PR | UK | M  |
| A0A1D3JY28 | Uncharacterized protein OS=Pseudomonas veronii 1YdBTEX2                                          | 36406    | 6.3911 | OM | UK | C  |
| A0A1D3JY68 | Esterase OS=Pseudomonas veronii 1YdBTEX2                                                         | 38026    | 5.2178 | EX | CY | CI |
| A0A1D3JY75 | Hypothetical secreted protein OS=Pseudomonas veronii 1YdBTEX2                                    | 8954     | 9.8804 | PR | OM | S  |
| A0A1D3JYA8 | Hypothetical secreted protein OS=Pseudomonas veronii 1YdBTEX2                                    | 9010     | 7.3184 | PR | OM | S  |
| A0A1D3JYZ2 | Uncharacterized protein OS=Pseudomonas veronii 1YdBTEX2                                          | 13950.67 | 4.53   | EX | UK | X  |
| A0A1D3JZ23 | Sugar ABC transporter substrate-binding protein OS=Pseudomonas veronii 1YdBTEX2                  | 48187    | 6.5244 | PR | UK | G  |
| A0A1D3JZA0 | TonB-dependent receptor OS=Pseudomonas veronii 1YdBTEX2                                          | 82573    | 5.1841 | OM | OM | PH |
| A0A1D3JZE2 | Ferripyoverdine receptor OS=Pseudomonas veronii 1YdBTEX2                                         | 88987    | 5.0303 | OM | OM | PH |
| A0A1D3K049 | L-arabinose-binding periplasmic protein OS=Pseudomonas veronii 1YdBTEX2                          | 35506    | 7.1763 | PR | PR | GK |
| A0A1D3K079 | Virulence factors putative positive transcription regulator BvgA OS=Pseudomonas veronii 1YdBTEX2 | 23017.24 | 8.86   | CY | CY | KT |
| A0A1D3K0Q4 | ABC transporter substrate-binding protein OS=Pseudomonas veronii 1YdBTEX2                        | 38151    | 5.9868 | PR | PR | E  |
| A0A1D3K0Q9 | Hydroxycinnamoyl-CoA hydratase-lyase OS=Pseudomonas veronii 1YdBTEX2                             | 31057.77 | 5.66   | CY | CY | IH |
| A0A1D3K181 | Isochorismatase OS=Pseudomonas veronii 1YdBTEX2                                                  | 20683    | 6.4131 | CY | CY | Q  |
| A0A1D3K1B1 | Chemotaxis protein OS=Pseudomonas veronii 1YdBTEX2                                               | 46935.2  | 4.99   | IM | IM | NT |
| A0A1D3K1U5 | Membrane protein OS=Pseudomonas veronii 1YdBTEX2                                                 | 77979    | 5.0684 | EX | OM | PH |

|            |                                                                                        |       |        |    |    |        |
|------------|----------------------------------------------------------------------------------------|-------|--------|----|----|--------|
| A0A1D3K1V3 | Cbb3-type cytochrome c oxidase subunit OS=Pseudomonas veronii 1YdBTEX2                 | 35294 | 6.0688 | IM | IM | C      |
| A0A1D3K1V5 | Extradiol dioxygenase OS=Pseudomonas veronii 1YdBTEX2                                  | 13312 | 4.83   | CY | UK | E      |
| A0A1D3K1V7 | Peptidase S41 OS=Pseudomonas veronii 1YdBTEX2                                          | 22441 | 8.666  | CY | UK | C      |
| A0A1D3K1Y8 | Cell division protein ZipA OS=Pseudomonas veronii 1YdBTEX2                             | 31651 | 5.3467 | IM | CY | X      |
| A0A1D3K251 | Amidotransferase OS=Pseudomonas veronii 1YdBTEX2                                       | 27763 | 5.2119 | CY | CY | F      |
| A0A1D3K2I7 | Lysine/arginine/ornithine-binding periplasmic protein OS=Pseudomonas veronii 1YdBTEX2  | 28347 | 7.0386 | PR | PR | ET     |
| A0A1D3K2T8 | CSD domain-containing protein OS=Pseudomonas veronii 1YdBTEX2                          | 7788  | 7.708  | CY | CY | KL     |
| A0A1D3K2Y0 | Methyl-accepting chemotaxis protein OS=Pseudomonas veronii 1YdBTEX2                    | 76074 | 4.8486 | IM | IM | NT(mx) |
| A0A1D3K2Y2 | Peptidase OS=Pseudomonas veronii 1YdBTEX2                                              | 47150 | 4.3711 | UK | OM | P      |
| A0A1D3K342 | Porin D OS=Pseudomonas veronii 1YdBTEX2                                                | 46960 | 5.6396 | OM | OM | S      |
| A0A1D3K345 | Secretion protein HyID OS=Pseudomonas veronii 1YdBTEX2                                 | 38015 | 8.9209 | IM | IM | MV     |
| A0A1D3K353 | Threonine synthase OS=Pseudomonas veronii 1YdBTEX2                                     | 51952 | 5.7393 | CY | CY | EP     |
| A0A1D3K3A4 | TonB-dependent receptor OS=Pseudomonas veronii 1YdBTEX2                                | 92999 | 6.4937 | EX | OM | PH     |
| A0A1D3K3P9 | Transcription termination/antitermination protein NusA OS=Pseudomonas veronii 1YdBTEX2 | 54381 | 4.3506 | CY | CY | KJ     |
| A0A1D3K3R6 | Catechol 1_2-dioxygenase OS=Pseudomonas veronii 1YdBTEX2                               | 34546 | 4.8457 | CY | CY | Q      |
| A0A1D3K3X1 | Acetone carboxylase gamma subunit OS=Pseudomonas veronii 1YdBTEX2                      | 19482 | 5.3862 | CY | CY | EQ     |

|            |                                                                                 |          |         |    |           |        |
|------------|---------------------------------------------------------------------------------|----------|---------|----|-----------|--------|
| A0A1D3K402 | Acetone carboxylase alpha subunit OS=Pseudomonas veronii 1YdBTEX2               | 86396    | 5.4595  | CY | CY        | EQ     |
| A0A1D3K451 | Acetone carboxylase beta subunit OS=Pseudomonas veronii 1YdBTEX2                | 77668    | 5.0962  | CY | CY        | EQ     |
| A0A1D3K4A8 | AMP nucleosidase OS=Pseudomonas veronii 1YdBTEX2                                | 54477    | 6.3633  | CY | CY        | F      |
| A0A1D3K4H5 | 6_7-dimethyl-8-ribityllumazine synthase OS=Pseudomonas veronii 1YdBTEX2         | 16437    | 5.6177  | CY | CY        | H      |
| A0A1D3K4M5 | 30S ribosomal protein S7 OS=Pseudomonas veronii 1YdBTEX2                        | 17636    | 10.5762 | CY | CY        | J      |
| A0A1D3K4P2 | 50S ribosomal protein L24 OS=Pseudomonas veronii 1YdBTEX2                       | 11338    | 10.5615 | CY | CY        | J      |
| A0A1D3K4U2 | Chaperone SurA OS=Pseudomonas veronii 1YdBTEX2                                  | 49411    | 5.3818  | CY | ML (C, P) | MO     |
| A0A1D3K4U4 | Coenzyme PQQ synthesis protein B OS=Pseudomonas veronii 1YdBTEX2                | 33073    | 4.9761  | UK | CY        | P      |
| A0A1D3K4X6 | TonB-dependent receptor OS=Pseudomonas veronii 1YdBTEX2                         | 60843    | 5.3994  | OM | OM        | PH     |
| A0A1D3K549 | Sarcosine oxidase subunit beta OS=Pseudomonas veronii 1YdBTEX2                  | 45155.73 | 8.2     | UK | CY        | EH(mx) |
| A0A1D3K558 | RNA polymerase sigma factor RpoD OS=Pseudomonas veronii 1YdBTEX2                | 69291    | 4.8516  | CY | CY        | K      |
| A0A1D3K5B8 | Aldehyde dehydrogenase OS=Pseudomonas veronii 1YdBTEX2                          | 52119    | 8.8096  | IM | CY        | C      |
| A0A1D3K5F0 | RNA pyrophosphohydrolase OS=Pseudomonas veronii 1YdBTEX2                        | 18868.82 | 9.3     | CY | CY        | LF     |
| A0A1D3K5L2 | Anaerobically-induced outer membrane porin OprE OS=Pseudomonas veronii 1YdBTEX2 | 47187    | 5.6455  | OM | OM        | S      |
| A0A1D3K5L4 | Transporter OS=Pseudomonas veronii 1YdBTEX2                                     | 34637    | 7.6758  | OM | IM        | MVI    |
| A0A1D3K5R1 | Cell division protein ZapA OS=Pseudomonas veronii 1YdBTEX2                      | 11579.9  | 5.64    | CY | UK        | D      |

|                              |                                                                                     |                |           |                                    |               |                          |
|------------------------------|-------------------------------------------------------------------------------------|----------------|-----------|------------------------------------|---------------|--------------------------|
| A0A1D3K5S1                   | sn-glycerol-3-phosphate transporter OS=Pseudomonas veronii 1YdBTEX2                 | 17731          | 9.5112    | EX                                 | UK            | S                        |
| A0A1D3K5Y5                   | Chemotaxis protein OS=Pseudomonas veronii 1YdBTEX2                                  | 70053          | 5.1577    | IM                                 | IM            | NT(mx)                   |
| A0A1D3K6A7                   | D-amino acid dehydrogenase OS=Pseudomonas veronii 1YdBTEX2                          | 47149.32       | 8.18      | PR                                 | ML (C a IM)   | EH(mx)                   |
| A0A1D3K6N0                   | Bifunctional protein GlmU OS=Pseudomonas veronii 1YdBTEX2                           | 48747.57       | 6.4       | CY                                 | CY            | JM                       |
| A0A1D3K7I1                   | Fe2OG dioxygenase domain-containing protein OS=Pseudomonas veronii 1YdBTEX2         | 24186          | 5.2207    | CY                                 | UK            | O                        |
| A0A1D3K906                   | CatO2ase OS=Pseudomonas veronii 1YdBTEX2                                            | 35016          | 5.5122    | CY                                 | CY            | E                        |
| A0A1D3K9G1                   | Hydrogenase transcriptional regulatory protein HoxA OS=Pseudomonas veronii 1YdBTEX2 | 54378.59       | 6.35      | CY                                 | CY            | TK                       |
|                              |                                                                                     |                |           |                                    |               |                          |
|                              |                                                                                     |                |           |                                    |               |                          |
|                              |                                                                                     |                |           |                                    |               |                          |
|                              |                                                                                     |                |           |                                    |               |                          |
| <b>Downregulated</b>         |                                                                                     |                |           |                                    |               |                          |
| <b>UNIPROT<br/>Accession</b> | <b>Protein name</b>                                                                 | <b>MW [Da]</b> | <b>pI</b> | <b>Localization<br/>SOSUIGramN</b> | <b>PSORTb</b> | <b>Function<br/>COGS</b> |
| A0A1D3JPL2                   | DNA gyrase subunit B OS=Pseudomonas veronii 1YdBTEX2                                | 90406.19       | 5.52      | CY                                 | CY            | L                        |
| A0A1D3JQH4                   | Methyl-accepting chemotaxis protein McpS OS=Pseudomonas veronii 1YdBTEX2            | 68360          | 4.8105    | IM                                 | IM            | NT(mx)                   |

|            |                                                                                            |          |        |    |             |        |
|------------|--------------------------------------------------------------------------------------------|----------|--------|----|-------------|--------|
| A0A1D3JQM4 | Cobyrlic acid synthase OS=Pseudomonas veronii 1YdBTEX2                                     | 28585    | 4.938  | UK | CY          | D      |
| A0A1D3JQN4 | Protein-export protein SecB OS=Pseudomonas veronii 1YdBTEX2                                | 17600    | 4.2979 | CY | CY          | U      |
| A0A1D3JR37 | Methyl-accepting chemotaxis protein CtpL OS=Pseudomonas veronii 1YdBTEX2                   | 69417    | 4.9614 | IM | OM          | NT(mx) |
| A0A1D3JR94 | Uncharacterized HTH-type transcriptional regulator PA4778 OS=Pseudomonas veronii 1YdBTEX2  | 15095    | 7.2583 | CY | CY          | KT     |
| A0A1D3JRP9 | Catabolite repressor/activator OS=Pseudomonas veronii 1YdBTEX2                             | 36325    | 6.75   | UK | CY          | KG     |
| A0A1D3JRT9 | Sulfate adenylyltransferase subunit 2 OS=Pseudomonas veronii 1YdBTEX2                      | 35198    | 5.9458 | CY | CY          | EH     |
| A0A1D3JS27 | UDP-N-acetylmuramoylalanine--D-glutamate ligase OS=Pseudomonas veronii 1YdBTEX2            | 47515.42 | 5.64   | CY | CY          | MHJ    |
| A0A1D3JS51 | D-alanine--D-alanine ligase OS=Pseudomonas veronii 1YdBTEX2                                | 34282    | 4.6377 | CY | CY          | FI     |
| A0A1D3JS54 | Cell division protein FtsA OS=Pseudomonas veronii 1YdBTEX2                                 | 44848    | 4.9761 | CY | CY          | DN(mx) |
| A0A1D3JSG1 | UDP-N-acetylmuramoyl-tripeptide--D-alanyl-D-alanine ligase OS=Pseudomonas veronii 1YdBTEX2 | 47310    | 6.5405 | CY | CY          | MHJ    |
| A0A1D3JUJ8 | Methyl-accepting chemotaxis protein OS=Pseudomonas veronii 1YdBTEX2                        | 73016.82 | 5.46   | IM | ML (IM, OM) | NT     |
| A0A1D3JV34 | 3-isopropylmalate dehydratase large subunit OS=Pseudomonas veronii 1YdBTEX2                | 50696    | 5.5444 | CY | CY          | EC     |
| A0A1D3JVI5 | Branched-chain-amino-acid aminotransferase OS=Pseudomonas veronii 1YdBTEX2                 | 36830    | 5.8887 | CY | CY          | E      |
| A0A1D3JVU1 | Major tail tube protein OS=Pseudomonas veronii 1YdBTEX2                                    | 18080.1  | 5.49   | CY | UK          | S      |
| A0A1D3JW75 | Disulfide-bond oxidoreductase YghU OS=Pseudomonas veronii 1YdBTEX2                         | 31018.84 | 5.9    | CY | CY          | OH     |
| A0A1D3JW89 | Aldehyde dehydrogenase OS=Pseudomonas veronii 1YdBTEX2                                     | 59606    | 6.1816 | CY | CY          | CE     |

|            |                                                                                       |       |        |    |    |        |
|------------|---------------------------------------------------------------------------------------|-------|--------|----|----|--------|
| A0A1D3JWI4 | Methyl-accepting chemotaxis protein OS=Pseudomonas veronii 1YdBTEX2                   | 57991 | 4.9131 | IM | IM | NT(mx) |
| A0A1D3JXE2 | Glycogen operon protein GlgX homolog OS=Pseudomonas veronii 1YdBTEX2                  | 81728 | 5.1533 | CY | CY | G      |
| A0A1D3JXK1 | Methylhydantoinase OS=Pseudomonas veronii 1YdBTEX2                                    | 59189 | 4.8721 | EX | CY | EQ     |
| A0A1D3JXN6 | 4-hydroxyphenylpyruvate dioxygenase OS=Pseudomonas veronii 1YdBTEX2                   | 40163 | 4.8076 | CY | CY | E      |
| A0A1D3JXS0 | Probable acetyl-CoA acetyltransferase OS=Pseudomonas veronii 1YdBTEX2                 | 40823 | 6.394  | CY | CY | I      |
| A0A1D3JXT7 | Acyl-CoA dehydrogenase OS=Pseudomonas veronii 1YdBTEX2                                | 40594 | 5.0845 | CY | CY | I      |
| A0A1D3JXY5 | Aldehyde-activating protein OS=Pseudomonas veronii 1YdBTEX2                           | 16947 | 6.0425 | UK | PR | S      |
| A0A1D3JY52 | Acetylornithine aminotransferase OS=Pseudomonas veronii 1YdBTEX2                      | 44912 | 6.3208 | CY | CY | EH     |
| A0A1D3JY66 | Probable enoyl-CoA hydratase OS=Pseudomonas veronii 1YdBTEX2                          | 27758 | 5.2939 | CY | CY | IH(mx) |
| A0A1D3JY92 | Alcohol dehydrogenase OS=Pseudomonas veronii 1YdBTEX2                                 | 37431 | 5.3042 | CY | CY | CP(mx) |
| A0A1D3JYB7 | Universal stress protein OS=Pseudomonas veronii 1YdBTEX2                              | 33891 | 5.6001 | UK | CY | T      |
| A0A1D3JZZ6 | Alcohol dehydrogenase_ propanol-preferring OS=Pseudomonas veronii 1YdBTEX2            | 35559 | 5.981  | UK | CY | CP     |
| A0A1D3K076 | Lysine/arginine/ornithine-binding periplasmic protein OS=Pseudomonas veronii 1YdBTEX2 | 28213 | 7.9233 | PR | PR | ET     |
| A0A1D3K167 | Peptidase M42 OS=Pseudomonas veronii 1YdBTEX2                                         | 42559 | 4.9805 | CY | CY | GE     |
| A0A1D3K184 | Succinate--CoA ligase [ADP-forming] subunit beta OS=Pseudomonas veronii 1YdBTEX2      | 42946 | 5.9312 | CY | CY | CF     |
| A0A1D3K1P0 | Dehydrogenase OS=Pseudomonas veronii 1YdBTEX2                                         | 26143 | 9.397  | PR | PR | S      |

|            |                                                                                    |       |         |    |    |    |
|------------|------------------------------------------------------------------------------------|-------|---------|----|----|----|
| A0A1D3K1Q3 | Cysteine synthase OS=Pseudomonas veronii 1YdBTEX2                                  | 32416 | 5.0361  | CY | CY | E  |
| A0A1D3K2B2 | 4-hydroxy-4-methyl-2-oxoglutarate aldolase OS=Pseudomonas veronii 1YdBTEX2         | 17408 | 4.4604  | CY | CY | H  |
| A0A1D3K2G3 | Arginine N-succinyltransferase subunit beta OS=Pseudomonas veronii 1YdBTEX2        | 37416 | 6.271   | CY | CY | E  |
| A0A1D3K2X0 | UPF0234 protein PVE_R1G4785 OS=Pseudomonas veronii 1YdBTEX2                        | 18236 | 7.3169  | CY | CY | S  |
| A0A1D3K314 | Glyceraldehyde-3-phosphate dehydrogenase OS=Pseudomonas veronii 1YdBTEX2           | 36056 | 6.23    | CY | CY | GE |
| A0A1D3K332 | Arginine deiminase OS=Pseudomonas veronii 1YdBTEX2                                 | 46343 | 5.2427  | CY | CY | E  |
| A0A1D3K371 | Iron-sulfur cluster assembly scaffold protein IscU OS=Pseudomonas veronii 1YdBTEX2 | 13861 | 5.0186  | CY | CY | CP |
| A0A1D3K3D5 | 30S ribosomal protein S16 OS=Pseudomonas veronii 1YdBTEX2                          | 9201  | 10.8369 | CY | CY | J  |
| A0A1D3K3I7 | Iron-binding protein IscA OS=Pseudomonas veronii 1YdBTEX2                          | 11648 | 4.6743  | CY | CY | C  |
| A0A1D3K3K8 | Glutathione peroxidase OS=Pseudomonas veronii 1YdBTEX2                             | 17519 | 5.2383  | CY | PR | CO |
| A0A1D3K3M6 | RNA polymerase-binding transcription factor DksA OS=Pseudomonas veronii 1YdBTEX2   | 17100 | 4.9497  | CY | CY | T  |
| A0A1D3K3P0 | Anthranilate 1_2-dioxygenase small subunit OS=Pseudomonas veronii 1YdBTEX2         | 19536 | 6.8965  | CY | CY | Q  |
| A0A1D3K3V4 | Phosphoglucosamine mutase OS=Pseudomonas veronii 1YdBTEX2                          | 47719 | 5.5254  | CY | CY | G  |
| A0A1D3K4M9 | 50S ribosomal protein L15 OS=Pseudomonas veronii 1YdBTEX2                          | 15215 | 11.2471 | CY | CY | J  |
| A0A1D3K4N8 | 30S ribosomal protein S17 OS=Pseudomonas veronii 1YdBTEX2                          | 10090 | 10.1455 | CY | CY | J  |
| A0A1D3K4Q4 | Anthranilate synthase component 1 OS=Pseudomonas veronii 1YdBTEX2                  | 54351 | 4.8413  | UK | CY | EH |

|            |                                                                                                      |          |         |    |    |        |
|------------|------------------------------------------------------------------------------------------------------|----------|---------|----|----|--------|
| A0A1D3K4R6 | 50S ribosomal protein L23 OS=Pseudomonas veronii 1YdBTEX2                                            | 10938    | 10.5088 | CY | CY | J      |
| A0A1D3K4R8 | UPF0229 protein PVE_R1G5476 OS=Pseudomonas veronii 1YdBTEX2                                          | 48607    | 6.4761  | CY | CY | S      |
| A0A1D3K563 | Rhamnosyltransferase 1 subunit A OS=Pseudomonas veronii 1YdBTEX2                                     | 33028    | 6.4922  | CY | CY | IC     |
| A0A1D3K569 | Glutathione-independent formaldehyde dehydrogenase OS=Pseudomonas veronii 1YdBTEX2                   | 42186    | 6.1626  | CY | CY | CE(mx) |
| A0A1D3K596 | Aspartate carbamoyltransferase OS=Pseudomonas veronii 1YdBTEX2                                       | 36358.97 | 7.14    | CY | CY | EF     |
| A0A1D3K5A9 | Thioesterase OS=Pseudomonas veronii 1YdBTEX2                                                         | 15057    | 7.314   | CY | CY | IQ     |
| A0A1D3K5D8 | 4-deoxy-4-formamido-L-arabinose-phosphoundecaprenol deformylase ArnD OS=Pseudomonas veronii 1YdBTEX2 | 79551    | 6.2769  | IM | IM | PC     |
| A0A1D3K5I5 | Fructose-1_6-bisphosphate aldolase OS=Pseudomonas veronii 1YdBTEX2                                   | 38385    | 5.291   | PR | CY | G      |
| A0A1D3K5S6 | Uncharacterized protein OS=Pseudomonas veronii 1YdBTEX2                                              | 34757    | 11.0405 | CY | UK | S      |
| A0A1D3K5U2 | Spermidine/putrescine import ATP-binding protein PotA OS=Pseudomonas veronii 1YdBTEX2                | 42374    | 5.9355  | CY | IM | PE(mx) |
| A0A1D3K616 | Biopolymer transport protein ExbB OS=Pseudomonas veronii 1YdBTEX2                                    | 29676.73 | 6.6     | IM | IM | U      |
| A0A1D3K679 | Type VI secretion protein ImpA OS=Pseudomonas veronii 1YdBTEX2                                       | 36751.68 | 4.56    | CY | UK | M      |
| A0A1D3K6F2 | Chemotaxis protein CheY OS=Pseudomonas veronii 1YdBTEX2                                              | 32512.18 | 8.95    | CY | CY | TK     |
| A0A1D3K7B5 | Uncharacterized protein OS=Pseudomonas veronii 1YdBTEX2                                              | 62364.94 | 5.61    | CY | CY | CI     |
| A0A1D3K9A2 | Integrase OS=Pseudomonas veronii 1YdBTEX2                                                            | 76864.24 | 7.96    | CY | CY | L      |

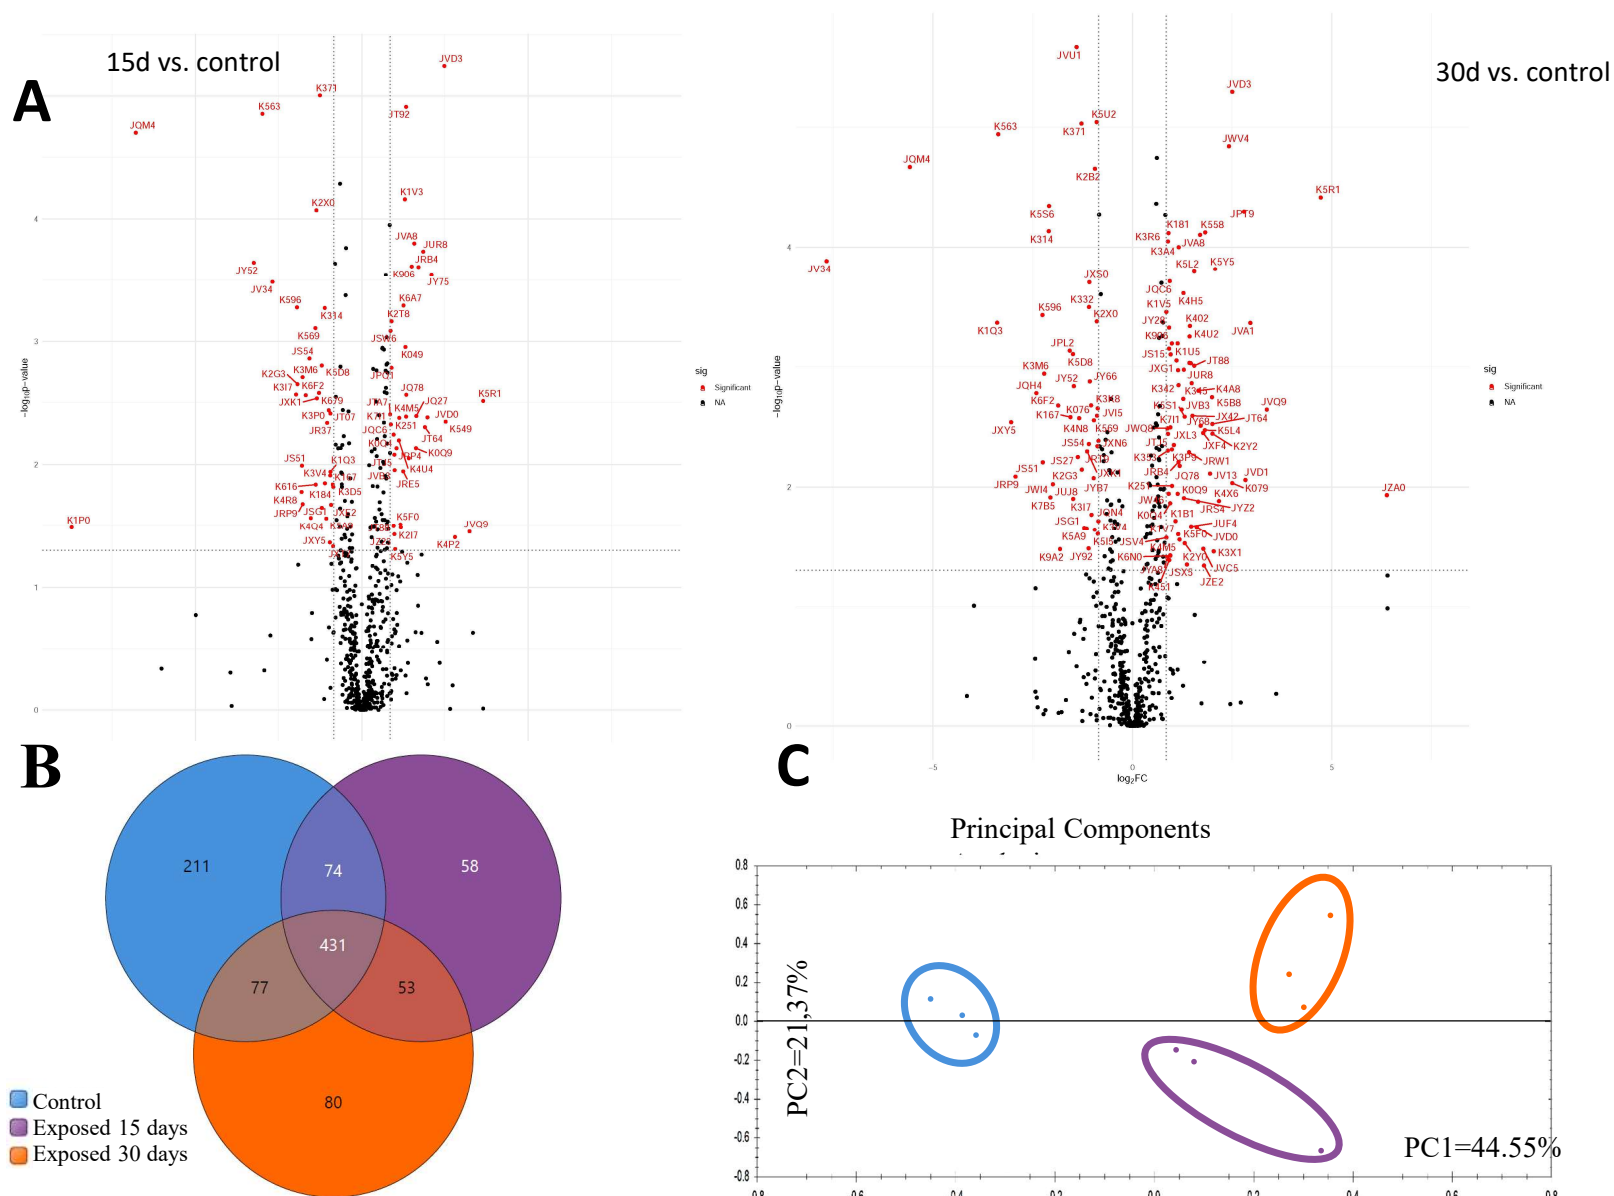

**Supplementary Figure S10.** Distribution of identified proteins of *P. veronii* among sampling points. **A.** Volcano plots of proteins identified in exposed samples (after 15 and 30 days) versus control (cells before PHE exposure). **B.** Venn diagram of the number of identified proteins in exposed *P. veronii* SM-20 compared to control. Overlapping regions indicate the number of proteins that are shared among the different samples under analysis. **C.** Principal component analysis, calculated and visualized using the functions integrated into Progenesis Q1, confirmed clustering of biological replicates into representative groups.

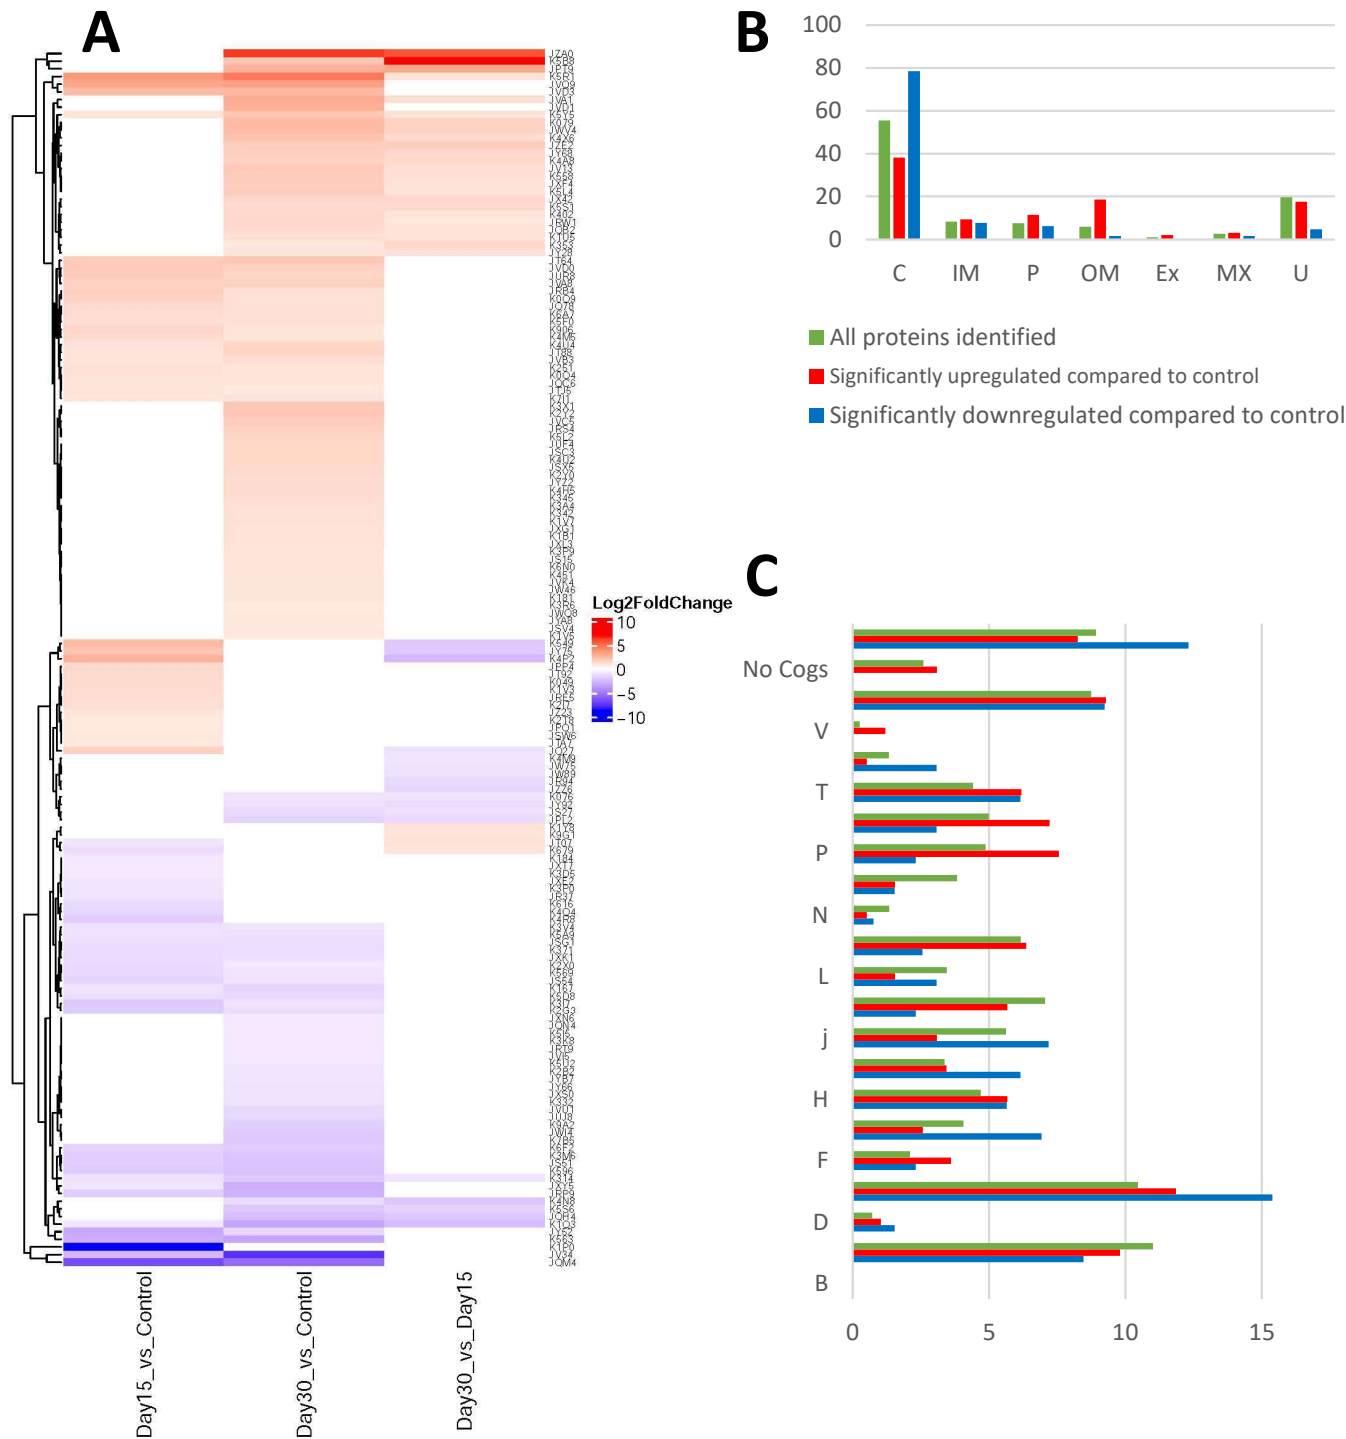

**Supplementary Figure S11.** Heat map (A) of statistically significant upregulated (red) and downregulated (blue) proteins of *P. veronii* and their classification based on subcellular localization (B) and clusters of orthologous groups (COGs) (C) in contrast to all identified (green) proteins. Subcellular localization (in percentages) according to PSORTb prediction tool (C-Cytoplasmic; IM-Inner membrane; P-Periplasmic; OM-Outer membrane; Ex-Extracellular; MX-Multiple Localization U-Unknown localization). Functional distribution (in percentages) by the EggNOG v5.0 database (B-Chromatin Structure and dynamics; C-Energy production and conversion; D-Cell cycle control, cell division, chromosome partitioning; E-Amino acid metabolism and transport; F-Nucleotide metabolism and transport; G-Carbohydrate metabolism and transport; H-Coenzyme transport and metabolism; I-Lipid transport and metabolism; J-Translation, ribosomal structures, and biogenesis; K-Transcription; L-Replication, recombination, and repair; M-Cell wall/membrane/envelop biogenesis; N-Cell motility; O-Post-translational modification, protein turnover, and chaperone functions; P-Inorganic ion transport and metabolism; Q-Secondary metabolites biosynthesis, transport, and catabolism; T-Signal transduction mechanisms; U-Intracellular trafficking, secretion, and vesicular transport; V-Defense mechanisms; S-Function unknown; MX-Multiple functions (more than 3).
